# Supplementary material
Source: publisher figshare collection journal article supplement (https://acs.figshare.com/ndownloader/files/7024997)
Supplement: Supplementary file 1 [file 7024997]

1
 

 20 21  0  0  0  0  0  0  0  0999 V2000
   -1.8661   -3.3511    0.0000 C   0  0  0  0  0  0  0  0  0  0  0  0
   -1.1516   -3.7636    0.0000 C   0  0  0  0  0  0  0  0  0  0  0  0
   -1.1516   -4.5886    0.0000 C   0  0  0  0  0  0  0  0  0  0  0  0
   -1.8661   -5.0011    0.0000 C   0  0  0  0  0  0  0  0  0  0  0  0
   -2.5805   -4.5886    0.0000 C   0  0  0  0  0  0  0  0  0  0  0  0
   -2.5805   -3.7636    0.0000 C   0  0  0  0  0  0  0  0  0  0  0  0
   -1.8661   -2.5261    0.0000 C   0  0  0  0  0  0  0  0  0  0  0  0
   -2.5805   -2.1136    0.0000 C   0  0  0  0  0  0  0  0  0  0  0  0
   -2.5805   -1.2886    0.0000 C   0  0  0  0  0  0  0  0  0  0  0  0
   -1.8661   -0.8761    0.0000 C   0  0  0  0  0  0  0  0  0  0  0  0
   -1.1516   -1.2886    0.0000 C   0  0  0  0  0  0  0  0  0  0  0  0
   -1.1516   -2.1136    0.0000 C   0  0  0  0  0  0  0  0  0  0  0  0
   -0.4371   -3.3511    0.0000 Cl  0  0  0  0  0  0  0  0  0  0  0  0
   -3.2950   -3.3511    0.0000 Cl  0  0  0  0  0  0  0  0  0  0  0  0
   -0.3547   -2.3271    0.0000 C   0  0  0  0  0  0  0  0  0  0  0  0
    0.2287   -1.7437    0.0000 C   0  0  0  0  0  0  0  0  0  0  0  0
   -3.3774   -2.3271    0.0000 C   0  0  0  0  0  0  0  0  0  0  0  0
   -3.9608   -1.7437    0.0000 C   0  0  0  0  0  0  0  0  0  0  0  0
   -3.5909   -3.1240    0.0000 C   0  0  0  0  0  0  0  0  0  0  0  0
   -0.1412   -3.1240    0.0000 C   0  0  0  0  0  0  0  0  0  0  0  0
  1  2  2  0  0  0  0
  1  6  1  0  0  0  0
  1  7  1  0  0  0  0
  2  3  1  0  0  0  0
  2 13  1  0  0  0  0
  3  4  2  0  0  0  0
  4  5  1  0  0  0  0
  5  6  2  0  0  0  0
  6 14  1  0  0  0  0
  7  8  2  0  0  0  0
  7 12  1  0  0  0  0
  8  9  1  0  0  0  0
  8 17  1  0  0  0  0
  9 10  2  0  0  0  0
 10 11  1  0  0  0  0
 11 12  2  0  0  0  0
 12 15  1  0  0  0  0
 15 16  1  0  0  0  0
 15 20  1  0  0  0  0
 17 18  1  0  0  0  0
 17 19  1  0  0  0  0
M  END
2
 

 32 37  0  0  0  0  0  0  0  0999 V2000
   -7.0518    1.5321    0.0000 C   0  0  0  0  0  0  0  0  0  0  0  0
   -7.7662    1.9446    0.0000 C   0  0  0  0  0  0  0  0  0  0  0  0
   -8.4808    1.5321    0.0000 C   0  0  0  0  0  0  0  0  0  0  0  0
   -8.4808    0.7071    0.0000 C   0  0  0  0  0  0  0  0  0  0  0  0
   -7.7662    0.2946    0.0000 C   0  0  0  0  0  0  0  0  0  0  0  0
   -7.0518    0.7071    0.0000 C   0  0  0  0  0  0  0  0  0  0  0  0
   -6.3373    0.2946    0.0000 C   0  0  0  0  0  0  0  0  0  0  0  0
   -5.6228    0.7071    0.0000 C   0  0  0  0  0  0  0  0  0  0  0  0
   -5.6228    1.5321    0.0000 C   0  0  0  0  0  0  0  0  0  0  0  0
   -6.3373    1.9446    0.0000 C   0  0  0  0  0  0  0  0  0  0  0  0
   -4.9084    0.2946    0.0000 C   0  0  0  0  0  0  0  0  0  0  0  0
   -4.1939    0.7071    0.0000 C   0  0  0  0  0  0  0  0  0  0  0  0
   -4.1939    1.5321    0.0000 C   0  0  0  0  0  0  0  0  0  0  0  0
   -4.9084    1.9446    0.0000 C   0  0  0  0  0  0  0  0  0  0  0  0
   -6.3570    4.3018    0.0000 C   0  0  0  0  0  0  0  0  0  0  0  0
   -7.0714    5.5393    0.0000 C   0  0  0  0  0  0  0  0  0  0  0  0
   -7.7859    5.9518    0.0000 C   0  0  0  0  0  0  0  0  0  0  0  0
   -8.5004    5.5393    0.0000 C   0  0  0  0  0  0  0  0  0  0  0  0
   -8.5004    4.7143    0.0000 C   0  0  0  0  0  0  0  0  0  0  0  0
   -7.7859    4.3018    0.0000 C   0  0  0  0  0  0  0  0  0  0  0  0
   -7.0714    4.7143    0.0000 C   0  0  0  0  0  0  0  0  0  0  0  0
   -5.6424    4.7143    0.0000 C   0  0  0  0  0  0  0  0  0  0  0  0
   -5.6424    5.5393    0.0000 C   0  0  0  0  0  0  0  0  0  0  0  0
   -6.3570    5.9518    0.0000 C   0  0  0  0  0  0  0  0  0  0  0  0
   -4.9280    4.3018    0.0000 C   0  0  0  0  0  0  0  0  0  0  0  0
   -4.2135    4.7143    0.0000 C   0  0  0  0  0  0  0  0  0  0  0  0
   -4.2135    5.5393    0.0000 C   0  0  0  0  0  0  0  0  0  0  0  0
   -4.9280    5.9518    0.0000 C   0  0  0  0  0  0  0  0  0  0  0  0
   -7.7859    3.4768    0.0000 C   0  0  0  0  0  0  0  0  0  0  0  0
   -7.7662    2.7696    0.0000 C   0  0  0  0  0  0  0  0  0  0  0  0
   -4.9280    3.4768    0.0000 C   0  0  0  0  0  0  0  0  0  0  0  0
   -4.9085    2.7696    0.0000 C   0  0  0  0  0  0  0  0  0  0  0  0
  1  2  2  0  0  0  0
  1  6  1  0  0  0  0
  1 10  1  0  0  0  0
  2  3  1  0  0  0  0
  2 30  1  0  0  0  0
  3  4  2  0  0  0  0
  4  5  1  0  0  0  0
  5  6  2  0  0  0  0
  6  7  1  0  0  0  0
  7  8  2  0  0  0  0
  8  9  1  0  0  0  0
  8 11  1  0  0  0  0
  9 10  2  0  0  0  0
  9 14  1  0  0  0  0
 10 15  1  0  0  0  0
 11 12  2  0  0  0  0
 12 13  1  0  0  0  0
 13 14  2  0  0  0  0
 14 32  1  0  0  0  0
 15 22  2  0  0  0  0
 16 17  2  0  0  0  0
 16 21  1  0  0  0  0
 17 18  1  0  0  0  0
 18 19  2  0  0  0  0
 19 20  1  0  0  0  0
 20 21  2  0  0  0  0
 20 29  1  0  0  0  0
 21 15  1  0  0  0  0
 22 25  1  0  0  0  0
 23 28  1  0  0  0  0
 23 24  2  0  0  0  0
 23 22  1  0  0  0  0
 24 16  1  0  0  0  0
 25 26  2  0  0  0  0
 25 31  1  0  0  0  0
 26 27  1  0  0  0  0
 27 28  2  0  0  0  0
M  END
3
 

 44 49  0  0  0  0  0  0  0  0999 V2000
    4.4982    2.8089    0.0000 C   0  0  0  0  0  0  0  0  0  0  0  0
    3.7837    2.3964    0.0000 C   0  0  0  0  0  0  0  0  0  0  0  0
    3.7837    1.5714    0.0000 C   0  0  0  0  0  0  0  0  0  0  0  0
    4.4982    1.1589    0.0000 C   0  0  0  0  0  0  0  0  0  0  0  0
    5.2127    1.5714    0.0000 C   0  0  0  0  0  0  0  0  0  0  0  0
    5.2127    2.3964    0.0000 C   0  0  0  0  0  0  0  0  0  0  0  0
    4.4982    0.2750    0.0000 C   0  0  0  0  0  0  0  0  0  0  0  0
    3.7837   -0.1375    0.0000 C   0  0  0  0  0  0  0  0  0  0  0  0
    3.7837   -0.9625    0.0000 C   0  0  0  0  0  0  0  0  0  0  0  0
    4.4982   -1.3751    0.0000 C   0  0  0  0  0  0  0  0  0  0  0  0
    5.2127   -0.9625    0.0000 C   0  0  0  0  0  0  0  0  0  0  0  0
    5.2127   -0.1375    0.0000 C   0  0  0  0  0  0  0  0  0  0  0  0
    2.9587    1.5714    0.0000 C   0  0  0  0  0  0  0  0  0  0  0  0
    2.1337    1.5714    0.0000 C   0  0  0  0  0  0  0  0  0  0  0  0
    1.3087    1.5714    0.0000 C   0  0  0  0  0  0  0  0  0  0  0  0
    6.0377    1.5714    0.0000 C   0  0  0  0  0  0  0  0  0  0  0  0
    6.8627    1.5714    0.0000 C   0  0  0  0  0  0  0  0  0  0  0  0
    7.6877    1.5714    0.0000 C   0  0  0  0  0  0  0  0  0  0  0  0
    2.9587   -0.1375    0.0000 C   0  0  0  0  0  0  0  0  0  0  0  0
    2.1337   -0.1375    0.0000 C   0  0  0  0  0  0  0  0  0  0  0  0
    1.3087   -0.1375    0.0000 C   0  0  0  0  0  0  0  0  0  0  0  0
    6.0377   -0.1375    0.0000 C   0  0  0  0  0  0  0  0  0  0  0  0
    6.8627   -0.1375    0.0000 C   0  0  0  0  0  0  0  0  0  0  0  0
    7.6877   -0.1375    0.0000 C   0  0  0  0  0  0  0  0  0  0  0  0
    0.8962    0.5769    0.0000 C   0  0  0  0  0  0  0  0  0  0  0  0
    0.0712    0.5769    0.0000 C   0  0  0  0  0  0  0  0  0  0  0  0
   -0.3413   -0.1375    0.0000 C   0  0  0  0  0  0  0  0  0  0  0  0
    0.0712   -0.8520    0.0000 C   0  0  0  0  0  0  0  0  0  0  0  0
    0.8962   -0.8520    0.0000 C   0  0  0  0  0  0  0  0  0  0  0  0
    8.1002    0.8570    0.0000 C   0  0  0  0  0  0  0  0  0  0  0  0
    8.9252    0.8570    0.0000 C   0  0  0  0  0  0  0  0  0  0  0  0
    9.3377    1.5714    0.0000 C   0  0  0  0  0  0  0  0  0  0  0  0
    8.9252    2.2859    0.0000 C   0  0  0  0  0  0  0  0  0  0  0  0
    8.1002    2.2859    0.0000 C   0  0  0  0  0  0  0  0  0  0  0  0
    8.1002   -0.8520    0.0000 C   0  0  0  0  0  0  0  0  0  0  0  0
    8.9252   -0.8520    0.0000 C   0  0  0  0  0  0  0  0  0  0  0  0
    9.3377   -0.1375    0.0000 C   0  0  0  0  0  0  0  0  0  0  0  0
    8.9252    0.5769    0.0000 C   0  0  0  0  0  0  0  0  0  0  0  0
    8.1002    0.5769    0.0000 C   0  0  0  0  0  0  0  0  0  0  0  0
    0.8962    2.2859    0.0000 C   0  0  0  0  0  0  0  0  0  0  0  0
    0.0712    2.2859    0.0000 C   0  0  0  0  0  0  0  0  0  0  0  0
   -0.3413    1.5714    0.0000 C   0  0  0  0  0  0  0  0  0  0  0  0
    0.0712    0.8570    0.0000 C   0  0  0  0  0  0  0  0  0  0  0  0
    0.8962    0.8570    0.0000 C   0  0  0  0  0  0  0  0  0  0  0  0
  1  2  2  0  0  0  0
  1  6  1  0  0  0  0
  2  3  1  0  0  0  0
  3  4  2  0  0  0  0
  3 13  1  0  0  0  0
  4  5  1  0  0  0  0
  4  7  1  0  0  0  0
  5  6  2  0  0  0  0
  5 16  1  0  0  0  0
  7  8  2  0  0  0  0
  7 12  1  0  0  0  0
  8  9  1  0  0  0  0
  8 19  1  0  0  0  0
  9 10  2  0  0  0  0
 10 11  1  0  0  0  0
 11 12  2  0  0  0  0
 12 22  1  0  0  0  0
 13 14  3  0  0  0  0
 14 15  1  0  0  0  0
 15 40  2  0  0  0  0
 15 44  1  0  0  0  0
 16 17  3  0  0  0  0
 17 18  1  0  0  0  0
 18 30  2  0  0  0  0
 18 34  1  0  0  0  0
 19 20  3  0  0  0  0
 20 21  1  0  0  0  0
 21 25  2  0  0  0  0
 21 29  1  0  0  0  0
 22 23  3  0  0  0  0
 23 24  1  0  0  0  0
 24 35  2  0  0  0  0
 24 39  1  0  0  0  0
 25 26  1  0  0  0  0
 26 27  2  0  0  0  0
 27 28  1  0  0  0  0
 28 29  2  0  0  0  0
 30 31  1  0  0  0  0
 31 32  2  0  0  0  0
 32 33  1  0  0  0  0
 33 34  2  0  0  0  0
 35 36  1  0  0  0  0
 36 37  2  0  0  0  0
 37 38  1  0  0  0  0
 38 39  2  0  0  0  0
 40 41  1  0  0  0  0
 41 42  2  0  0  0  0
 42 43  1  0  0  0  0
 43 44  2  0  0  0  0
M  END
4
 

 48 55  0  0  0  0  0  0  0  0999 V2000
   -1.0804    6.8750    0.0000 C   0  0  0  0  0  0  0  0  0  0  0  0
   -1.7948    6.4625    0.0000 C   0  0  0  0  0  0  0  0  0  0  0  0
   -1.7948    5.6375    0.0000 C   0  0  0  0  0  0  0  0  0  0  0  0
   -1.0804    5.2250    0.0000 C   0  0  0  0  0  0  0  0  0  0  0  0
   -0.3659    5.6375    0.0000 C   0  0  0  0  0  0  0  0  0  0  0  0
   -0.3659    6.4625    0.0000 C   0  0  0  0  0  0  0  0  0  0  0  0
    0.4591    6.4625    0.0000 C   0  0  0  0  0  0  0  0  0  0  0  0
    0.8716    5.7480    0.0000 C   0  0  0  0  0  0  0  0  0  0  0  0
    1.6966    5.7480    0.0000 C   0  0  0  0  0  0  0  0  0  0  0  0
    2.1091    6.4625    0.0000 C   0  0  0  0  0  0  0  0  0  0  0  0
    1.6966    7.1770    0.0000 C   0  0  0  0  0  0  0  0  0  0  0  0
    0.8716    7.1770    0.0000 C   0  0  0  0  0  0  0  0  0  0  0  0
   -1.4929    7.5895    0.0000 C   0  0  0  0  0  0  0  0  0  0  0  0
   -1.0804    8.3040    0.0000 C   0  0  0  0  0  0  0  0  0  0  0  0
   -1.4929    9.0185    0.0000 C   0  0  0  0  0  0  0  0  0  0  0  0
   -2.3179    9.0185    0.0000 C   0  0  0  0  0  0  0  0  0  0  0  0
   -2.7304    8.3040    0.0000 C   0  0  0  0  0  0  0  0  0  0  0  0
   -2.3179    7.5895    0.0000 C   0  0  0  0  0  0  0  0  0  0  0  0
   -1.0804    4.4000    0.0000 C   0  0  0  0  0  0  0  0  0  0  0  0
   -1.7948    3.9875    0.0000 C   0  0  0  0  0  0  0  0  0  0  0  0
   -1.7948    3.1625    0.0000 C   0  0  0  0  0  0  0  0  0  0  0  0
   -1.0804    2.7499    0.0000 C   0  0  0  0  0  0  0  0  0  0  0  0
   -0.3659    3.1625    0.0000 C   0  0  0  0  0  0  0  0  0  0  0  0
   -0.3659    3.9875    0.0000 C   0  0  0  0  0  0  0  0  0  0  0  0
    2.1091    5.0336    0.0000 C   0  0  0  0  0  0  0  0  0  0  0  0
    1.6966    4.3191    0.0000 C   0  0  0  0  0  0  0  0  0  0  0  0
    2.1091    3.6046    0.0000 C   0  0  0  0  0  0  0  0  0  0  0  0
    2.9341    3.6046    0.0000 C   0  0  0  0  0  0  0  0  0  0  0  0
    3.3466    4.3190    0.0000 C   0  0  0  0  0  0  0  0  0  0  0  0
    2.9341    5.0335    0.0000 C   0  0  0  0  0  0  0  0  0  0  0  0
    0.4591    7.8914    0.0000 C   0  0  0  0  0  0  0  0  0  0  0  0
    0.8716    8.6059    0.0000 C   0  0  0  0  0  0  0  0  0  0  0  0
    0.4591    9.3204    0.0000 C   0  0  0  0  0  0  0  0  0  0  0  0
   -0.3659    9.3204    0.0000 C   0  0  0  0  0  0  0  0  0  0  0  0
   -0.7784    8.6060    0.0000 C   0  0  0  0  0  0  0  0  0  0  0  0
   -0.3659    7.8915    0.0000 C   0  0  0  0  0  0  0  0  0  0  0  0
   -2.7304    6.8750    0.0000 C   0  0  0  0  0  0  0  0  0  0  0  0
   -1.0804    9.7329    0.0000 C   0  0  0  0  0  0  0  0  0  0  0  0
   -3.5554    6.8750    0.0000 C   0  0  0  0  0  0  0  0  0  0  0  0
   -3.9679    6.1605    0.0000 C   0  0  0  0  0  0  0  0  0  0  0  0
   -3.5554    5.4461    0.0000 C   0  0  0  0  0  0  0  0  0  0  0  0
   -2.7304    5.4461    0.0000 C   0  0  0  0  0  0  0  0  0  0  0  0
   -2.3179    6.1606    0.0000 C   0  0  0  0  0  0  0  0  0  0  0  0
   -0.2554    9.7329    0.0000 C   0  0  0  0  0  0  0  0  0  0  0  0
    0.1571   10.4474    0.0000 C   0  0  0  0  0  0  0  0  0  0  0  0
   -0.2553   11.1619    0.0000 C   0  0  0  0  0  0  0  0  0  0  0  0
   -1.0803   11.1619    0.0000 C   0  0  0  0  0  0  0  0  0  0  0  0
   -1.4929   10.4474    0.0000 C   0  0  0  0  0  0  0  0  0  0  0  0
  1  2  2  0  0  0  0
  1  6  1  0  0  0  0
  1 13  1  0  0  0  0
  2  3  1  0  0  0  0
  3  4  2  0  0  0  0
  4  5  1  0  0  0  0
  4 19  1  0  0  0  0
  5  6  2  0  0  0  0
  6  7  1  0  0  0  0
  7  8  2  0  0  0  0
  7 12  1  0  0  0  0
  8  9  1  0  0  0  0
  9 10  2  0  0  0  0
  9 25  1  0  0  0  0
 10 11  1  0  0  0  0
 11 12  2  0  0  0  0
 12 31  1  0  0  0  0
 13 14  2  0  0  0  0
 13 18  1  0  0  0  0
 14 15  1  0  0  0  0
 15 16  2  0  0  0  0
 15 38  1  0  0  0  0
 16 17  1  0  0  0  0
 17 18  2  0  0  0  0
 18 37  1  0  0  0  0
 19 20  2  0  0  0  0
 19 24  1  0  0  0  0
 20 21  1  0  0  0  0
 21 22  2  0  0  0  0
 22 23  1  0  0  0  0
 23 24  2  0  0  0  0
 25 26  2  0  0  0  0
 25 30  1  0  0  0  0
 26 27  1  0  0  0  0
 27 28  2  0  0  0  0
 28 29  1  0  0  0  0
 29 30  2  0  0  0  0
 31 32  2  0  0  0  0
 31 36  1  0  0  0  0
 32 33  1  0  0  0  0
 33 34  2  0  0  0  0
 34 35  1  0  0  0  0
 35 36  2  0  0  0  0
 37 39  2  0  0  0  0
 37 43  1  0  0  0  0
 38 44  2  0  0  0  0
 38 48  1  0  0  0  0
 39 40  1  0  0  0  0
 40 41  2  0  0  0  0
 41 42  1  0  0  0  0
 42 43  2  0  0  0  0
 44 45  1  0  0  0  0
 45 46  2  0  0  0  0
 46 47  1  0  0  0  0
 47 48  2  0  0  0  0
M  END
5
 

 29 31  0  0  0  0  0  0  0  0999 V2000
   -2.0441    0.0331    0.0000 C   0  0  0  0  0  0  0  0  0  0  0  0
   -1.5297   -0.6119    0.0000 C   0  0  0  0  0  0  0  0  0  0  0  0
   -0.7139   -0.4889    0.0000 C   0  0  0  0  0  0  0  0  0  0  0  0
   -0.4125    0.2790    0.0000 C   0  0  0  0  0  0  0  0  0  0  0  0
   -0.9269    0.9241    0.0000 C   0  0  0  0  0  0  0  0  0  0  0  0
   -1.7427    0.8011    0.0000 C   0  0  0  0  0  0  0  0  0  0  0  0
    0.4125    0.2790    0.0000 C   0  0  0  0  0  0  0  0  0  0  0  0
    0.7139   -0.4889    0.0000 C   0  0  0  0  0  0  0  0  0  0  0  0
    1.5297   -0.6119    0.0000 C   0  0  0  0  0  0  0  0  0  0  0  0
    2.0441    0.0331    0.0000 C   0  0  0  0  0  0  0  0  0  0  0  0
    1.7427    0.8011    0.0000 C   0  0  0  0  0  0  0  0  0  0  0  0
    0.9269    0.9241    0.0000 C   0  0  0  0  0  0  0  0  0  0  0  0
   -0.7433    1.7284    0.0000 C   0  0  0  0  0  0  0  0  0  0  0  0
    0.7433    1.7284    0.0000 C   0  0  0  0  0  0  0  0  0  0  0  0
   -0.0000    2.0863    0.0000 C   0  0  0  0  0  0  0  0  0  0  0  0
    2.0196   -1.2757    0.0000 C   0  0  0  0  0  0  0  0  0  0  0  0
   -2.0196   -1.2757    0.0000 C   0  0  0  0  0  0  0  0  0  0  0  0
   -1.6897   -2.0318    0.0000 O   0  0  0  0  0  0  0  0  0  0  0  0
   -2.8394   -1.1833    0.0000 O   0  0  0  0  0  0  0  0  0  0  0  0
   -0.6379   -1.2662    0.0000 C   0  0  0  0  0  0  0  0  0  0  0  0
    2.8394   -1.1833    0.0000 F   0  0  0  0  0  0  0  0  0  0  0  0
    1.6897   -2.0318    0.0000 F   0  0  0  0  0  0  0  0  0  0  0  0
    2.6030   -1.8590    0.0000 F   0  0  0  0  0  0  0  0  0  0  0  0
   -1.4115   -1.5528    0.0000 F   0  0  0  0  0  0  0  0  0  0  0  0
   -0.5480   -2.0863    0.0000 F   0  0  0  0  0  0  0  0  0  0  0  0
    0.1733   -1.4165    0.0000 F   0  0  0  0  0  0  0  0  0  0  0  0
    0.7139   -1.2943    0.0000 C   0  0  0  0  0  0  0  0  0  0  0  0
    0.1859   -1.9282    0.0000 O   0  0  0  0  0  0  0  0  0  0  0  0
    1.4677   -1.6086    0.0000 O   0  0  0  0  0  0  0  0  0  0  0  0
  1  2  2  0  0  0  0
  1  6  1  0  0  0  0
  2  3  1  0  0  0  0
  2 17  1  0  0  0  0
  3  4  2  0  0  0  0
  3 20  1  0  0  0  0
  4  5  1  0  0  0  0
  4  7  1  0  0  0  0
  5  6  2  0  0  0  0
  5 13  1  0  0  0  0
  7  8  2  0  0  0  0
  7 12  1  0  0  0  0
  8  9  1  0  0  0  0
  8 27  1  0  0  0  0
  9 10  2  0  0  0  0
  9 16  1  0  0  0  0
 10 11  1  0  0  0  0
 11 12  2  0  0  0  0
 12 14  1  0  0  0  0
 14 15  1  0  0  0  0
 15 13  1  0  0  0  0
 16 21  1  0  0  0  0
 16 22  1  0  0  0  0
 16 23  1  0  0  0  0
 17 18  1  0  0  0  0
 17 19  2  0  0  0  0
 20 24  1  0  0  0  0
 20 25  1  0  0  0  0
 20 26  1  0  0  0  0
 27 28  1  0  0  0  0
 27 29  2  0  0  0  0
M  END
6
 

 33 37  0  0  0  0  0  0  0  0999 V2000
   -3.2018    4.5572    0.0000 C   0  0  0  0  0  0  0  0  0  0  0  0
   -3.9163    4.1447    0.0000 C   0  0  0  0  0  0  0  0  0  0  0  0
   -3.9163    3.3196    0.0000 C   0  0  0  0  0  0  0  0  0  0  0  0
   -3.2018    2.9071    0.0000 C   0  0  0  0  0  0  0  0  0  0  0  0
   -2.4873    3.3196    0.0000 C   0  0  0  0  0  0  0  0  0  0  0  0
   -2.4873    4.1447    0.0000 C   0  0  0  0  0  0  0  0  0  0  0  0
   -1.7728    2.9071    0.0000 C   0  0  0  0  0  0  0  0  0  0  0  0
   -1.0584    3.3196    0.0000 C   0  0  0  0  0  0  0  0  0  0  0  0
   -1.0584    4.1446    0.0000 C   0  0  0  0  0  0  0  0  0  0  0  0
   -1.7728    4.5571    0.0000 O   0  0  0  0  0  0  0  0  0  0  0  0
   -0.3439    2.9071    0.0000 C   0  0  0  0  0  0  0  0  0  0  0  0
    0.3706    3.3196    0.0000 C   0  0  0  0  0  0  0  0  0  0  0  0
    0.3706    4.1446    0.0000 C   0  0  0  0  0  0  0  0  0  0  0  0
   -0.3439    4.5571    0.0000 C   0  0  0  0  0  0  0  0  0  0  0  0
   -2.5933    2.8209    0.0000 O   0  0  0  0  0  0  0  0  0  0  0  0
   -2.7648    2.0139    0.0000 C   0  0  0  0  0  0  0  0  0  0  0  0
   -2.0504    1.6014    0.0000 C   0  0  0  0  0  0  0  0  0  0  0  0
   -1.4373    2.1534    0.0000 C   0  0  0  0  0  0  0  0  0  0  0  0
   -1.8788    0.7944    0.0000 C   0  0  0  0  0  0  0  0  0  0  0  0
   -1.0942    0.5395    0.0000 C   0  0  0  0  0  0  0  0  0  0  0  0
   -0.4811    1.0915    0.0000 C   0  0  0  0  0  0  0  0  0  0  0  0
   -0.6526    1.8985    0.0000 C   0  0  0  0  0  0  0  0  0  0  0  0
    1.0851    4.5571    0.0000 O   0  0  0  0  0  0  0  0  0  0  0  0
   -0.3439    5.3821    0.0000 Cl  0  0  0  0  0  0  0  0  0  0  0  0
   -0.4421    2.1999    0.0000 Cl  0  0  0  0  0  0  0  0  0  0  0  0
   -3.2018    5.3822    0.0000 Cl  0  0  0  0  0  0  0  0  0  0  0  0
   -4.6307    4.5571    0.0000 O   0  0  0  0  0  0  0  0  0  0  0  0
   -3.2018    2.0821    0.0000 Cl  0  0  0  0  0  0  0  0  0  0  0  0
   -3.4793    1.6014    0.0000 O   0  0  0  0  0  0  0  0  0  0  0  0
    0.2509    2.0753    0.0000 Cl  0  0  0  0  0  0  0  0  0  0  0  0
    0.3035    0.8366    0.0000 Cl  0  0  0  0  0  0  0  0  0  0  0  0
   -0.9227   -0.2675    0.0000 Cl  0  0  0  0  0  0  0  0  0  0  0  0
   -2.4919    0.2424    0.0000 Cl  0  0  0  0  0  0  0  0  0  0  0  0
  1  2  2  0  0  0  0
  1  6  1  0  0  0  0
  1 26  1  0  0  0  0
  2  3  1  0  0  0  0
  2 27  1  0  0  0  0
  3  4  2  0  0  0  0
  4  5  1  0  0  0  0
  4 28  1  0  0  0  0
  5  6  2  0  0  0  0
  5  7  1  0  0  0  0
  6 10  1  0  0  0  0
  7  8  1  0  0  0  0
  7 15  1  0  0  0  0
  7 18  1  0  0  0  0
  8 11  2  0  0  0  0
  9 10  1  0  0  0  0
  9 14  2  0  0  0  0
  9  8  1  0  0  0  0
 11 12  1  0  0  0  0
 11 25  1  0  0  0  0
 12 13  2  0  0  0  0
 13 14  1  0  0  0  0
 13 23  1  0  0  0  0
 14 24  1  0  0  0  0
 15 16  1  0  0  0  0
 16 17  1  0  0  0  0
 16 29  2  0  0  0  0
 17 19  2  0  0  0  0
 18 22  2  0  0  0  0
 18 17  1  0  0  0  0
 19 20  1  0  0  0  0
 19 33  1  0  0  0  0
 20 21  2  0  0  0  0
 20 32  1  0  0  0  0
 21 22  1  0  0  0  0
 21 31  1  0  0  0  0
 22 30  1  0  0  0  0
M  END
7
 

 46 53  0  0  0  0  0  0  0  0999 V2000
   -9.0986   -3.2529    0.0000 N   0  0  0  0  0  0  0  0  0  0  0  0
   -9.8130   -2.8404    0.0000 C   0  0  3  0  0  0  0  0  0  0  0  0
   -9.8130   -2.0154    0.0000 C   0  0  0  0  0  0  0  0  0  0  0  0
   -8.3841   -2.0154    0.0000 C   0  0  3  0  0  0  0  0  0  0  0  0
   -8.3841   -2.8404    0.0000 C   0  0  3  0  0  0  0  0  0  0  0  0
   -7.6697   -3.2529    0.0000 N   0  0  0  0  0  0  0  0  0  0  0  0
   -6.9552   -2.0154    0.0000 C   0  0  0  0  0  0  0  0  0  0  0  0
   -6.9552   -2.8404    0.0000 C   0  0  0  0  0  0  0  0  0  0  0  0
   -6.2407   -3.2529    0.0000 C   0  0  0  0  0  0  0  0  0  0  0  0
   -5.5263   -2.8404    0.0000 C   0  0  0  0  0  0  0  0  0  0  0  0
   -5.5263   -2.0154    0.0000 C   0  0  0  0  0  0  0  0  0  0  0  0
   -6.2407   -1.6029    0.0000 C   0  0  0  0  0  0  0  0  0  0  0  0
  -10.5275   -3.2528    0.0000 C   0  0  0  0  0  0  0  0  0  0  0  0
  -10.5276   -4.0778    0.0000 N   0  0  0  0  0  0  0  0  0  0  0  0
   -9.8131   -4.4903    0.0000 C   0  0  3  0  0  0  0  0  0  0  0  0
   -9.0986   -4.0779    0.0000 C   0  0  0  0  0  0  0  0  0  0  0  0
  -11.2420   -2.8403    0.0000 O   0  0  0  0  0  0  0  0  0  0  0  0
   -8.3841   -4.4904    0.0000 O   0  0  0  0  0  0  0  0  0  0  0  0
  -11.2420   -4.4903    0.0000 C   0  0  0  0  0  0  0  0  0  0  0  0
   -9.8131   -5.3153    0.0000 C   0  0  0  0  0  0  0  0  0  0  0  0
   -9.0987   -5.7279    0.0000 C   0  0  0  0  0  0  0  0  0  0  0  0
   -9.0987   -6.5529    0.0000 C   0  0  0  0  0  0  0  0  0  0  0  0
   -8.3842   -5.3154    0.0000 C   0  0  0  0  0  0  0  0  0  0  0  0
   -7.6823    0.3023    0.0000 N   0  0  0  0  0  0  0  0  0  0  0  0
   -6.9679   -0.1102    0.0000 C   0  0  3  0  0  0  0  0  0  0  0  0
   -6.9679   -0.9352    0.0000 C   0  0  0  0  0  0  0  0  0  0  0  0
   -8.3968   -0.9352    0.0000 C   0  0  3  0  0  0  0  0  0  0  0  0
   -8.3968   -0.1102    0.0000 C   0  0  3  0  0  0  0  0  0  0  0  0
   -9.1112    0.3023    0.0000 N   0  0  0  0  0  0  0  0  0  0  0  0
   -9.8257   -0.9352    0.0000 C   0  0  0  0  0  0  0  0  0  0  0  0
   -9.8257   -0.1102    0.0000 C   0  0  0  0  0  0  0  0  0  0  0  0
  -10.5401    0.3023    0.0000 C   0  0  0  0  0  0  0  0  0  0  0  0
  -11.2546   -0.1101    0.0000 C   0  0  0  0  0  0  0  0  0  0  0  0
  -11.2546   -0.9351    0.0000 C   0  0  0  0  0  0  0  0  0  0  0  0
  -10.5401   -1.3477    0.0000 C   0  0  0  0  0  0  0  0  0  0  0  0
   -6.2533    0.3023    0.0000 C   0  0  0  0  0  0  0  0  0  0  0  0
   -6.2533    1.1273    0.0000 N   0  0  0  0  0  0  0  0  0  0  0  0
   -6.9678    1.5398    0.0000 C   0  0  3  0  0  0  0  0  0  0  0  0
   -7.6823    1.1273    0.0000 C   0  0  0  0  0  0  0  0  0  0  0  0
   -5.5389   -0.1102    0.0000 O   0  0  0  0  0  0  0  0  0  0  0  0
   -8.3967    1.5399    0.0000 O   0  0  0  0  0  0  0  0  0  0  0  0
   -5.5388    1.5398    0.0000 C   0  0  0  0  0  0  0  0  0  0  0  0
   -6.9678    2.3648    0.0000 C   0  0  0  0  0  0  0  0  0  0  0  0
   -7.6822    2.7773    0.0000 C   0  0  0  0  0  0  0  0  0  0  0  0
   -7.6822    3.6023    0.0000 C   0  0  0  0  0  0  0  0  0  0  0  0
   -8.3967    2.3648    0.0000 C   0  0  0  0  0  0  0  0  0  0  0  0
  1  2  1  0  0  0  0
  1  5  1  0  0  0  0
  1 16  1  0  0  0  0
  2  3  1  0  0  0  0
  2 13  1  0  0  0  0
  3  4  1  0  0  0  0
  4  5  1  0  0  0  0
  4  7  1  0  0  0  0
  6  8  1  0  0  0  0
  6  5  1  0  0  0  0
  7 12  2  0  0  0  0
  7  8  1  0  0  0  0
  8  9  2  0  0  0  0
  9 10  1  0  0  0  0
 10 11  2  0  0  0  0
 11 12  1  0  0  0  0
 13 14  1  0  0  0  0
 13 17  2  0  0  0  0
 14 15  1  0  0  0  0
 14 19  1  0  0  0  0
 15 16  1  0  0  0  0
 15 20  1  0  0  0  0
 16 18  2  0  0  0  0
 20 21  1  0  0  0  0
 21 22  1  0  0  0  0
 21 23  1  0  0  0  0
 24 25  1  0  0  0  0
 24 28  1  0  0  0  0
 24 39  1  0  0  0  0
 25 26  1  0  0  0  0
 25 36  1  0  0  0  0
 26 27  1  0  0  0  0
 27 28  1  0  0  0  0
 27 30  1  0  0  0  0
 27  4  1  0  0  0  0
 29 31  1  0  0  0  0
 29 28  1  0  0  0  0
 30 35  2  0  0  0  0
 30 31  1  0  0  0  0
 31 32  2  0  0  0  0
 32 33  1  0  0  0  0
 33 34  2  0  0  0  0
 34 35  1  0  0  0  0
 36 37  1  0  0  0  0
 36 40  2  0  0  0  0
 37 38  1  0  0  0  0
 37 42  1  0  0  0  0
 38 39  1  0  0  0  0
 38 43  1  0  0  0  0
 39 41  2  0  0  0  0
 43 44  1  0  0  0  0
 44 45  1  0  0  0  0
 44 46  1  0  0  0  0
M  END
8
 

 70 81  0  0  0  0  0  0  0  0999 V2000
    3.1427    3.2740    0.0000 N   0  0  0  0  0  0  0  0  0  0  0  0
    2.3380    3.2737    0.0000 P   0  0  0  0  0  0  0  0  0  0  0  0
    1.9518    4.0027    0.0000 O   0  0  0  0  0  0  0  0  0  0  0  0
    1.1410    4.1552    0.0000 C   0  0  0  0  0  0  0  0  0  0  0  0
    0.5162    3.6165    0.0000 C   0  0  0  0  0  0  0  0  0  0  0  0
   -0.2628    3.8881    0.0000 C   0  0  0  0  0  0  0  0  0  0  0  0
   -0.4170    4.6986    0.0000 C   0  0  0  0  0  0  0  0  0  0  0  0
   -1.1960    4.9703    0.0000 C   0  0  0  0  0  0  0  0  0  0  0  0
   -1.8207    4.4315    0.0000 C   0  0  0  0  0  0  0  0  0  0  0  0
   -1.6665    3.6210    0.0000 C   0  0  0  0  0  0  0  0  0  0  0  0
   -0.8875    3.3494    0.0000 C   0  0  0  0  0  0  0  0  0  0  0  0
    0.2078    5.2374    0.0000 C   0  0  0  0  0  0  0  0  0  0  0  0
    0.9868    4.9657    0.0000 C   0  0  0  0  0  0  0  0  0  0  0  0
    1.4145    5.6712    0.0000 Si  0  0  0  0  0  0  0  0  0  0  0  0
    1.8422    6.3767    0.0000 C   0  0  0  0  0  0  0  0  0  0  0  0
    2.6670    6.3590    0.0000 C   0  0  0  0  0  0  0  0  0  0  0  0
    3.0947    7.0645    0.0000 C   0  0  0  0  0  0  0  0  0  0  0  0
    2.6976    7.7876    0.0000 C   0  0  0  0  0  0  0  0  0  0  0  0
    1.8727    7.8053    0.0000 C   0  0  0  0  0  0  0  0  0  0  0  0
    1.4450    7.0998    0.0000 C   0  0  0  0  0  0  0  0  0  0  0  0
    0.8437    6.2669    0.0000 C   0  0  0  0  0  0  0  0  0  0  0  0
    1.0743    7.0590    0.0000 C   0  0  0  0  0  0  0  0  0  0  0  0
    0.5035    7.6548    0.0000 C   0  0  0  0  0  0  0  0  0  0  0  0
   -0.2978    7.4583    0.0000 C   0  0  0  0  0  0  0  0  0  0  0  0
   -0.5283    6.6662    0.0000 C   0  0  0  0  0  0  0  0  0  0  0  0
    0.0424    6.0705    0.0000 C   0  0  0  0  0  0  0  0  0  0  0  0
    2.2066    5.4407    0.0000 C   0  0  0  0  0  0  0  0  0  0  0  0
    2.4030    4.6394    0.0000 C   0  0  0  0  0  0  0  0  0  0  0  0
    3.1952    4.4088    0.0000 C   0  0  0  0  0  0  0  0  0  0  0  0
    3.7909    4.9796    0.0000 C   0  0  0  0  0  0  0  0  0  0  0  0
    3.5944    5.7809    0.0000 C   0  0  0  0  0  0  0  0  0  0  0  0
    2.8023    6.0114    0.0000 C   0  0  0  0  0  0  0  0  0  0  0  0
    0.5479    2.7921    0.0000 C   0  0  0  0  0  0  0  0  0  0  0  0
    1.2122    2.3029    0.0000 C   0  0  0  0  0  0  0  0  0  0  0  0
    2.0089    2.5172    0.0000 O   0  0  0  0  0  0  0  0  0  0  0  0
    1.1207    1.4830    0.0000 C   0  0  0  0  0  0  0  0  0  0  0  0
    0.3649    1.1523    0.0000 C   0  0  0  0  0  0  0  0  0  0  0  0
   -0.2994    1.6415    0.0000 C   0  0  0  0  0  0  0  0  0  0  0  0
   -0.2079    2.4614    0.0000 C   0  0  0  0  0  0  0  0  0  0  0  0
   -0.8722    2.9506    0.0000 C   0  0  0  0  0  0  0  0  0  0  0  0
   -1.6280    2.6199    0.0000 C   0  0  0  0  0  0  0  0  0  0  0  0
   -1.7196    1.8000    0.0000 C   0  0  0  0  0  0  0  0  0  0  0  0
   -1.0553    1.3108    0.0000 C   0  0  0  0  0  0  0  0  0  0  0  0
    1.6013    0.8124    0.0000 Si  0  0  0  0  0  0  0  0  0  0  0  0
    2.0819    0.1418    0.0000 C   0  0  0  0  0  0  0  0  0  0  0  0
    1.7415   -0.6096    0.0000 C   0  0  0  0  0  0  0  0  0  0  0  0
    2.2221   -1.2802    0.0000 C   0  0  0  0  0  0  0  0  0  0  0  0
    3.0431   -1.1993    0.0000 C   0  0  0  0  0  0  0  0  0  0  0  0
    3.3835   -0.4478    0.0000 C   0  0  0  0  0  0  0  0  0  0  0  0
    2.9029    0.2228    0.0000 C   0  0  0  0  0  0  0  0  0  0  0  0
    1.0780    0.1746    0.0000 C   0  0  0  0  0  0  0  0  0  0  0  0
    0.2640    0.3089    0.0000 C   0  0  0  0  0  0  0  0  0  0  0  0
   -0.2593   -0.3289    0.0000 C   0  0  0  0  0  0  0  0  0  0  0  0
    0.0314   -1.1010    0.0000 C   0  0  0  0  0  0  0  0  0  0  0  0
    0.8453   -1.2353    0.0000 C   0  0  0  0  0  0  0  0  0  0  0  0
    1.3687   -0.5975    0.0000 C   0  0  0  0  0  0  0  0  0  0  0  0
    2.3734    1.1031    0.0000 C   0  0  0  0  0  0  0  0  0  0  0  0
    3.0112    0.5798    0.0000 C   0  0  0  0  0  0  0  0  0  0  0  0
    3.7833    0.8705    0.0000 C   0  0  0  0  0  0  0  0  0  0  0  0
    3.9176    1.6844    0.0000 C   0  0  0  0  0  0  0  0  0  0  0  0
    3.2798    2.2078    0.0000 C   0  0  0  0  0  0  0  0  0  0  0  0
    2.5077    1.9171    0.0000 C   0  0  0  0  0  0  0  0  0  0  0  0
    3.8572    3.6865    0.0000 C   0  0  3  0  0  0  0  0  0  0  0  0
    4.5717    3.2740    0.0000 C   0  0  0  0  0  0  0  0  0  0  0  0
    3.8572    4.5115    0.0000 C   0  0  0  0  0  0  0  0  0  0  0  0
    4.5717    2.4490    0.0000 C   0  0  0  0  0  0  0  0  0  0  0  0
    5.2862    2.0365    0.0000 C   0  0  0  0  0  0  0  0  0  0  0  0
    6.0007    2.4490    0.0000 C   0  0  0  0  0  0  0  0  0  0  0  0
    6.0007    3.2740    0.0000 C   0  0  0  0  0  0  0  0  0  0  0  0
    5.2862    3.6865    0.0000 C   0  0  0  0  0  0  0  0  0  0  0  0
  1 63  1  0  0  0  0
  2  1  1  0  0  0  0
  2 35  1  0  0  0  0
  3  2  1  0  0  0  0
  4  3  1  0  0  0  0
  4 13  2  0  0  0  0
  4  5  1  0  0  0  0
  6  5  2  0  0  0  0
  6 11  1  0  0  0  0
  6  7  1  0  0  0  0
  8  7  1  0  0  0  0
  9  8  2  0  0  0  0
 10  9  1  0  0  0  0
 11 10  2  0  0  0  0
 12  7  2  0  0  0  0
 12 13  1  0  0  0  0
 14 13  1  0  0  0  0
 15 14  1  0  0  0  0
 15 20  2  0  0  0  0
 16 15  1  0  0  0  0
 17 16  2  0  0  0  0
 18 17  1  0  0  0  0
 19 18  2  0  0  0  0
 20 19  1  0  0  0  0
 21 14  1  0  0  0  0
 21 26  2  0  0  0  0
 21 22  1  0  0  0  0
 23 22  2  0  0  0  0
 23 24  1  0  0  0  0
 25 24  2  0  0  0  0
 25 26  1  0  0  0  0
 27 14  1  0  0  0  0
 27 32  2  0  0  0  0
 28 27  1  0  0  0  0
 29 28  2  0  0  0  0
 30 29  1  0  0  0  0
 31 30  2  0  0  0  0
 32 31  1  0  0  0  0
 33  5  1  0  0  0  0
 33 39  2  0  0  0  0
 34 33  1  0  0  0  0
 35 34  1  0  0  0  0
 36 34  2  0  0  0  0
 36 37  1  0  0  0  0
 38 37  2  0  0  0  0
 38 43  1  0  0  0  0
 38 39  1  0  0  0  0
 40 39  1  0  0  0  0
 41 40  2  0  0  0  0
 42 41  1  0  0  0  0
 43 42  2  0  0  0  0
 44 36  1  0  0  0  0
 45 44  1  0  0  0  0
 45 50  2  0  0  0  0
 45 46  1  0  0  0  0
 47 46  2  0  0  0  0
 47 48  1  0  0  0  0
 49 48  2  0  0  0  0
 49 50  1  0  0  0  0
 51 44  1  0  0  0  0
 51 56  2  0  0  0  0
 51 52  1  0  0  0  0
 53 52  2  0  0  0  0
 53 54  1  0  0  0  0
 55 54  2  0  0  0  0
 55 56  1  0  0  0  0
 57 44  1  0  0  0  0
 57 62  2  0  0  0  0
 58 57  1  0  0  0  0
 59 58  2  0  0  0  0
 60 59  1  0  0  0  0
 61 60  2  0  0  0  0
 62 61  1  0  0  0  0
 63 64  1  0  0  0  0
 63 65  1  0  0  0  0
 64 66  1  0  0  0  0
 64 70  2  0  0  0  0
 66 67  2  0  0  0  0
 67 68  1  0  0  0  0
 68 69  2  0  0  0  0
 69 70  1  0  0  0  0
M  END
9
 

 53 61  0  0  0  0  0  0  0  0999 V2000
   -1.3973    3.9078    0.0000 N   0  0  0  0  0  0  0  0  0  0  0  0
   -2.2178    3.8215    0.0000 C   0  0  0  0  0  0  0  0  0  0  0  0
   -2.3893    3.0146    0.0000 C   0  0  0  0  0  0  0  0  0  0  0  0
   -1.6748    2.6021    0.0000 C   0  0  3  0  0  0  0  0  0  0  0  0
   -1.0618    3.1541    0.0000 C   0  0  3  0  0  0  0  0  0  0  0  0
   -1.5886    1.7816    0.0000 C   0  0  3  0  0  0  0  0  0  0  0  0
   -2.2017    1.2295    0.0000 C   0  0  0  0  0  0  0  0  0  0  0  0
   -1.8662    0.4759    0.0000 C   0  0  0  0  0  0  0  0  0  0  0  0
   -1.0457    0.5622    0.0000 N   0  0  0  0  0  0  0  0  0  0  0  0
   -0.8741    1.3691    0.0000 C   0  0  3  0  0  0  0  0  0  0  0  0
   -0.5904    2.2825    0.0000 O   0  0  0  0  0  0  0  0  0  0  0  0
   -0.2413    3.0678    0.0000 C   0  0  0  0  0  0  0  0  0  0  0  0
    0.2437    3.7352    0.0000 N   0  0  0  0  0  0  0  0  0  0  0  0
   -0.0919    4.4889    0.0000 C   0  0  0  0  0  0  0  0  0  0  0  0
   -0.9124    4.5752    0.0000 C   0  0  0  0  0  0  0  0  0  0  0  0
   -0.4326    0.0101    0.0000 C   0  0  0  0  0  0  0  0  0  0  0  0
    0.3521    0.2650    0.0000 C   0  0  0  0  0  0  0  0  0  0  0  0
    0.5236    1.0720    0.0000 N   0  0  0  0  0  0  0  0  0  0  0  0
   -0.0895    1.6240    0.0000 C   0  0  0  0  0  0  0  0  0  0  0  0
    0.1728    2.5695    0.0000 O   0  0  0  0  0  0  0  0  0  0  0  0
    0.2041    2.1632    0.0000 O   0  0  0  0  0  0  0  0  0  0  0  0
   -1.2479    5.3289    0.0000 O   0  0  0  0  0  0  0  0  0  0  0  0
   -0.6041   -0.7969    0.0000 O   0  0  0  0  0  0  0  0  0  0  0  0
    0.9651   -0.2870    0.0000 C   0  0  0  0  0  0  0  0  0  0  0  0
    1.7498   -0.0321    0.0000 C   0  0  0  0  0  0  0  0  0  0  0  0
    0.3931    5.1563    0.0000 C   0  0  0  0  0  0  0  0  0  0  0  0
    1.2135    5.0701    0.0000 C   0  0  0  0  0  0  0  0  0  0  0  0
    1.6260    4.3556    0.0000 C   0  0  0  0  0  0  0  0  0  0  0  0
    2.4330    4.5271    0.0000 C   0  0  0  0  0  0  0  0  0  0  0  0
    2.5192    5.3476    0.0000 N   0  0  0  0  0  0  0  0  0  0  0  0
    1.7656    5.6831    0.0000 C   0  0  0  0  0  0  0  0  0  0  0  0
    2.4172   -0.5170    0.0000 C   0  0  0  0  0  0  0  0  0  0  0  0
    3.0846   -0.0321    0.0000 N   0  0  0  0  0  0  0  0  0  0  0  0
    2.8297    0.7525    0.0000 C   0  0  0  0  0  0  0  0  0  0  0  0
    2.0047    0.7525    0.0000 C   0  0  0  0  0  0  0  0  0  0  0  0
    1.5922    1.4670    0.0000 C   0  0  0  0  0  0  0  0  0  0  0  0
    2.0047    2.1815    0.0000 C   0  0  0  0  0  0  0  0  0  0  0  0
    2.8297    2.1815    0.0000 C   0  0  0  0  0  0  0  0  0  0  0  0
    3.2422    1.4670    0.0000 C   0  0  0  0  0  0  0  0  0  0  0  0
    1.3711    3.5710    0.0000 C   0  0  0  0  0  0  0  0  0  0  0  0
    1.9231    2.9579    0.0000 C   0  0  0  0  0  0  0  0  0  0  0  0
    2.7300    3.1294    0.0000 C   0  0  0  0  0  0  0  0  0  0  0  0
    2.9850    3.9140    0.0000 C   0  0  0  0  0  0  0  0  0  0  0  0
    1.5941    6.4901    0.0000 C   0  0  0  0  0  0  0  0  0  0  0  0
    2.4172   -1.3420    0.0000 C   0  0  0  0  0  0  0  0  0  0  0  0
    0.8095    6.7451    0.0000 C   0  0  0  0  0  0  0  0  0  0  0  0
    2.2072    7.0421    0.0000 C   0  0  0  0  0  0  0  0  0  0  0  0
    1.7027   -1.7545    0.0000 C   0  0  0  0  0  0  0  0  0  0  0  0
    3.1317   -1.7545    0.0000 C   0  0  0  0  0  0  0  0  0  0  0  0
    2.0357    7.8491    0.0000 C   0  0  0  0  0  0  0  0  0  0  0  0
    3.1317   -2.5795    0.0000 C   0  0  0  0  0  0  0  0  0  0  0  0
    2.2037   -2.1389    0.0000 C   0  0  0  0  0  0  0  0  0  0  0  0
    1.1816    7.2046    0.0000 C   0  0  0  0  0  0  0  0  0  0  0  0
  1  2  1  0  0  0  0
  1  5  1  0  0  0  0
  1 15  1  0  0  0  0
  2  3  1  0  0  0  0
  3  4  1  0  0  0  0
  4  5  1  0  0  0  0
  4  6  1  0  0  0  0
  5 11  1  0  0  0  0
  5 12  1  0  0  0  0
  6  7  1  0  0  0  0
  6 10  1  0  0  0  0
  7  8  1  0  0  0  0
  8  9  1  0  0  0  0
  9 10  1  0  0  0  0
  9 16  1  0  0  0  0
 10 19  1  0  0  0  0
 11 10  1  0  0  0  0
 12 13  1  0  0  0  0
 12 20  2  0  0  0  0
 13 14  1  0  0  0  0
 14 15  1  0  0  0  0
 14 26  2  0  0  0  0
 15 22  2  0  0  0  0
 16 17  1  0  0  0  0
 16 23  2  0  0  0  0
 17 18  1  0  0  0  0
 17 24  2  0  0  0  0
 18 19  1  0  0  0  0
 19 21  2  0  0  0  0
 24 25  1  0  0  0  0
 25 32  2  0  0  0  0
 25 35  1  0  0  0  0
 26 27  1  0  0  0  0
 27 28  1  0  0  0  0
 27 31  2  0  0  0  0
 28 40  2  0  0  0  0
 29 30  1  0  0  0  0
 29 43  2  0  0  0  0
 29 28  1  0  0  0  0
 30 31  1  0  0  0  0
 31 44  1  0  0  0  0
 32 33  1  0  0  0  0
 32 45  1  0  0  0  0
 33 34  1  0  0  0  0
 34 39  2  0  0  0  0
 34 35  1  0  0  0  0
 35 36  2  0  0  0  0
 36 37  1  0  0  0  0
 37 38  2  0  0  0  0
 38 39  1  0  0  0  0
 40 41  1  0  0  0  0
 41 42  2  0  0  0  0
 42 43  1  0  0  0  0
 44 46  1  0  0  0  0
 44 47  1  0  0  0  0
 44 53  1  0  0  0  0
 45 48  1  0  0  0  0
 45 49  1  0  0  0  0
 45 52  1  0  0  0  0
 47 50  2  0  0  0  0
 49 51  2  0  0  0  0
M  END
10
 

 54 59  0  0  0  0  0  0  0  0999 V2000
   -0.6429    3.6538    0.0000 C   0  0  0  0  0  0  0  0  0  0  0  0
    0.0716    3.2413    0.0000 C   0  0  0  0  0  0  0  0  0  0  0  0
    0.0716    2.4163    0.0000 C   0  0  0  0  0  0  0  0  0  0  0  0
   -0.6429    2.0038    0.0000 C   0  0  0  0  0  0  0  0  0  0  0  0
   -1.3574    2.4163    0.0000 C   0  0  0  0  0  0  0  0  0  0  0  0
   -1.3574    3.2413    0.0000 C   0  0  0  0  0  0  0  0  0  0  0  0
   -2.0718    2.0038    0.0000 C   0  0  0  0  0  0  0  0  0  0  0  0
   -2.0718    1.1788    0.0000 C   0  0  0  0  0  0  0  0  0  0  0  0
   -1.3574    0.7663    0.0000 N   0  0  0  0  0  0  0  0  0  0  0  0
   -0.6429    1.1788    0.0000 C   0  0  3  0  0  0  0  0  0  0  0  0
    0.0716    0.7663    0.0000 C   0  0  0  0  0  0  0  0  0  0  0  0
    0.0716   -0.0587    0.0000 C   0  0  0  0  0  0  0  0  0  0  0  0
    0.7861   -0.4712    0.0000 C   0  0  0  0  0  0  0  0  0  0  0  0
   -0.6429   -0.4712    0.0000 C   0  0  0  0  0  0  0  0  0  0  0  0
   -1.3574   -0.0587    0.0000 C   0  0  0  0  0  0  0  0  0  0  0  0
    1.6106    1.9723    0.0000 C   0  0  0  0  0  0  0  0  0  0  0  0
    0.7861    3.6538    0.0000 O   0  0  0  0  0  0  0  0  0  0  0  0
    0.7861    4.4788    0.0000 C   0  0  0  0  0  0  0  0  0  0  0  0
    0.0716    4.8913    0.0000 C   0  0  0  0  0  0  0  0  0  0  0  0
    0.0716    5.7163    0.0000 C   0  0  0  0  0  0  0  0  0  0  0  0
    0.7861    6.1288    0.0000 C   0  0  0  0  0  0  0  0  0  0  0  0
    1.5005    5.7163    0.0000 C   0  0  0  0  0  0  0  0  0  0  0  0
    1.5005    4.8913    0.0000 C   0  0  0  0  0  0  0  0  0  0  0  0
    2.2150    4.4788    0.0000 C   0  0  3  0  0  0  0  0  0  0  0  0
    2.9295    4.8913    0.0000 N   0  0  0  0  0  0  0  0  0  0  0  0
    2.9295    5.7163    0.0000 C   0  0  0  0  0  0  0  0  0  0  0  0
    2.2150    6.1288    0.0000 C   0  0  0  0  0  0  0  0  0  0  0  0
    3.6439    4.4788    0.0000 C   0  0  0  0  0  0  0  0  0  0  0  0
    2.2150    3.6538    0.0000 C   0  0  0  0  0  0  0  0  0  0  0  0
    2.9295    3.2413    0.0000 C   0  0  0  0  0  0  0  0  0  0  0  0
    3.6439    3.6538    0.0000 C   0  0  0  0  0  0  0  0  0  0  0  0
   -0.6429    6.1288    0.0000 O   0  0  0  0  0  0  0  0  0  0  0  0
   -0.6429    6.9538    0.0000 C   0  0  0  0  0  0  0  0  0  0  0  0
   -0.7489    4.8989    0.0000 O   0  0  0  0  0  0  0  0  0  0  0  0
   -0.6429    4.4788    0.0000 O   0  0  0  0  0  0  0  0  0  0  0  0
   -1.3574    4.8913    0.0000 C   0  0  0  0  0  0  0  0  0  0  0  0
    2.9295    2.4163    0.0000 C   0  0  0  0  0  0  0  0  0  0  0  0
    2.3250    2.3848    0.0000 C   0  0  0  0  0  0  0  0  0  0  0  0
    1.6106    1.1472    0.0000 C   0  0  0  0  0  0  0  0  0  0  0  0
    2.3250    0.7347    0.0000 C   0  0  0  0  0  0  0  0  0  0  0  0
    3.0395    1.1472    0.0000 C   0  0  0  0  0  0  0  0  0  0  0  0
    3.0395    1.9723    0.0000 C   0  0  0  0  0  0  0  0  0  0  0  0
    3.7540    2.3848    0.0000 C   0  0  3  0  0  0  0  0  0  0  0  0
    3.7540    0.7347    0.0000 C   0  0  0  0  0  0  0  0  0  0  0  0
    4.4684    1.1472    0.0000 C   0  0  0  0  0  0  0  0  0  0  0  0
    4.4684    1.9723    0.0000 N   0  0  0  0  0  0  0  0  0  0  0  0
    0.8961    0.7347    0.0000 O   0  0  0  0  0  0  0  0  0  0  0  0
    5.1829    2.3847    0.0000 C   0  0  0  0  0  0  0  0  0  0  0  0
    3.7540    3.2098    0.0000 C   0  0  0  0  0  0  0  0  0  0  0  0
    4.4684    3.6223    0.0000 C   0  0  0  0  0  0  0  0  0  0  0  0
    4.4684    4.4473    0.0000 C   0  0  0  0  0  0  0  0  0  0  0  0
    5.1829    3.2098    0.0000 C   0  0  0  0  0  0  0  0  0  0  0  0
    0.8961   -0.0903    0.0000 C   0  0  0  0  0  0  0  0  0  0  0  0
    0.7861    2.0038    0.0000 O   0  0  0  0  0  0  0  0  0  0  0  0
  1  6  2  0  0  0  0
  2  1  1  0  0  0  0
  3  2  2  0  0  0  0
  3 54  1  0  0  0  0
  4  3  1  0  0  0  0
  4 10  1  0  0  0  0
  5  4  2  0  0  0  0
  6  5  1  0  0  0  0
  7  5  1  0  0  0  0
  8  7  1  0  0  0  0
  9  8  1  0  0  0  0
 10  9  1  0  0  0  0
 11 10  1  0  0  0  0
 12 11  1  0  0  0  0
 13 12  1  0  0  0  0
 14 12  1  0  0  0  0
 15  9  1  0  0  0  0
 16 39  1  0  0  0  0
 17  2  1  0  0  0  0
 18 17  1  0  0  0  0
 19 18  1  0  0  0  0
 19 20  2  0  0  0  0
 21 20  1  0  0  0  0
 21 22  2  0  0  0  0
 22 27  1  0  0  0  0
 23 18  2  0  0  0  0
 23 22  1  0  0  0  0
 24 23  1  0  0  0  0
 25 24  1  0  0  0  0
 26 25  1  0  0  0  0
 27 26  1  0  0  0  0
 28 25  1  0  0  0  0
 29 24  1  0  0  0  0
 30 29  1  0  0  0  0
 30 37  1  0  0  0  0
 31 30  1  0  0  0  0
 32 20  1  0  0  0  0
 33 32  1  0  0  0  0
 34 19  1  0  0  0  0
 35  1  1  0  0  0  0
 36 35  1  0  0  0  0
 38 42  1  0  0  0  0
 38 16  2  0  0  0  0
 39 40  2  0  0  0  0
 39 47  1  0  0  0  0
 40 41  1  0  0  0  0
 41 42  2  0  0  0  0
 41 44  1  0  0  0  0
 43 46  1  0  0  0  0
 43 42  1  0  0  0  0
 43 49  1  0  0  0  0
 44 45  1  0  0  0  0
 45 46  1  0  0  0  0
 46 48  1  0  0  0  0
 47 53  1  0  0  0  0
 49 50  1  0  0  0  0
 50 51  1  0  0  0  0
 50 52  1  0  0  0  0
 54 16  1  0  0  0  0
M  END
11
 

 67 74  0  0  0  0  0  0  0  0999 V2000
   -0.6429    3.6538    0.0000 C   0  0  0  0  0  0  0  0  0  0  0  0
    0.0716    3.2413    0.0000 C   0  0  0  0  0  0  0  0  0  0  0  0
    0.0716    2.4163    0.0000 C   0  0  0  0  0  0  0  0  0  0  0  0
   -0.6429    2.0038    0.0000 C   0  0  0  0  0  0  0  0  0  0  0  0
   -1.3574    2.4163    0.0000 C   0  0  0  0  0  0  0  0  0  0  0  0
   -1.3574    3.2413    0.0000 C   0  0  0  0  0  0  0  0  0  0  0  0
   -2.0718    2.0038    0.0000 C   0  0  0  0  0  0  0  0  0  0  0  0
   -2.0718    1.1788    0.0000 C   0  0  0  0  0  0  0  0  0  0  0  0
   -1.3574    0.7663    0.0000 N   0  0  0  0  0  0  0  0  0  0  0  0
   -0.6429    1.1788    0.0000 C   0  0  3  0  0  0  0  0  0  0  0  0
    0.0716    0.7663    0.0000 C   0  0  0  0  0  0  0  0  0  0  0  0
    0.0716   -0.0587    0.0000 C   0  0  0  0  0  0  0  0  0  0  0  0
    0.7861   -0.4712    0.0000 C   0  0  0  0  0  0  0  0  0  0  0  0
   -0.6429   -0.4712    0.0000 C   0  0  0  0  0  0  0  0  0  0  0  0
   -1.3574   -0.0587    0.0000 C   0  0  0  0  0  0  0  0  0  0  0  0
    1.6106    1.9723    0.0000 C   0  0  0  0  0  0  0  0  0  0  0  0
    0.7861    3.6538    0.0000 O   0  0  0  0  0  0  0  0  0  0  0  0
    0.7861    4.4788    0.0000 C   0  0  0  0  0  0  0  0  0  0  0  0
    0.0716    4.8913    0.0000 C   0  0  0  0  0  0  0  0  0  0  0  0
    0.0716    5.7163    0.0000 C   0  0  0  0  0  0  0  0  0  0  0  0
    0.7861    6.1288    0.0000 C   0  0  0  0  0  0  0  0  0  0  0  0
    1.5005    5.7163    0.0000 C   0  0  0  0  0  0  0  0  0  0  0  0
    1.5005    4.8913    0.0000 C   0  0  0  0  0  0  0  0  0  0  0  0
    2.2150    4.4788    0.0000 C   0  0  3  0  0  0  0  0  0  0  0  0
    2.9295    4.8913    0.0000 N   0  0  0  0  0  0  0  0  0  0  0  0
    2.9295    5.7163    0.0000 C   0  0  0  0  0  0  0  0  0  0  0  0
    2.2150    6.1288    0.0000 C   0  0  0  0  0  0  0  0  0  0  0  0
    3.6439    4.4788    0.0000 C   0  0  0  0  0  0  0  0  0  0  0  0
    2.2150    3.6538    0.0000 C   0  0  0  0  0  0  0  0  0  0  0  0
    2.9295    3.2413    0.0000 C   0  0  0  0  0  0  0  0  0  0  0  0
    3.6439    3.6538    0.0000 C   0  0  0  0  0  0  0  0  0  0  0  0
   -0.6429    6.1288    0.0000 O   0  0  0  0  0  0  0  0  0  0  0  0
   -0.6429    6.9538    0.0000 C   0  0  0  0  0  0  0  0  0  0  0  0
   -0.7489    4.8989    0.0000 O   0  0  0  0  0  0  0  0  0  0  0  0
   -0.6429    4.4788    0.0000 O   0  0  0  0  0  0  0  0  0  0  0  0
    2.9295    2.4163    0.0000 C   0  0  0  0  0  0  0  0  0  0  0  0
    2.3250    2.3848    0.0000 C   0  0  0  0  0  0  0  0  0  0  0  0
    1.6106    1.1472    0.0000 C   0  0  0  0  0  0  0  0  0  0  0  0
    2.3250    0.7347    0.0000 C   0  0  0  0  0  0  0  0  0  0  0  0
    3.0395    1.1472    0.0000 C   0  0  0  0  0  0  0  0  0  0  0  0
    3.0395    1.9723    0.0000 C   0  0  0  0  0  0  0  0  0  0  0  0
    3.7540    2.3848    0.0000 C   0  0  3  0  0  0  0  0  0  0  0  0
    3.7540    0.7347    0.0000 C   0  0  0  0  0  0  0  0  0  0  0  0
    4.4684    1.1472    0.0000 C   0  0  0  0  0  0  0  0  0  0  0  0
    4.4684    1.9723    0.0000 N   0  0  0  0  0  0  0  0  0  0  0  0
    0.8961    0.7347    0.0000 O   0  0  0  0  0  0  0  0  0  0  0  0
    5.1829    2.3847    0.0000 C   0  0  0  0  0  0  0  0  0  0  0  0
    3.7540    3.2098    0.0000 C   0  0  0  0  0  0  0  0  0  0  0  0
    4.4684    3.6223    0.0000 C   0  0  0  0  0  0  0  0  0  0  0  0
    4.4684    4.4473    0.0000 C   0  0  0  0  0  0  0  0  0  0  0  0
    5.1829    3.2098    0.0000 C   0  0  0  0  0  0  0  0  0  0  0  0
    0.8961   -0.0903    0.0000 C   0  0  0  0  0  0  0  0  0  0  0  0
    0.7861    2.0038    0.0000 O   0  0  0  0  0  0  0  0  0  0  0  0
   -1.4634    5.3114    0.0000 C   0  0  0  0  0  0  0  0  0  0  0  0
   -1.4634    6.1364    0.0000 C   0  0  0  0  0  0  0  0  0  0  0  0
   -2.1779    6.5489    0.0000 C   0  0  0  0  0  0  0  0  0  0  0  0
   -2.8923    6.1364    0.0000 C   0  0  0  0  0  0  0  0  0  0  0  0
   -2.8923    5.3114    0.0000 C   0  0  0  0  0  0  0  0  0  0  0  0
   -2.1778    4.8989    0.0000 C   0  0  0  0  0  0  0  0  0  0  0  0
   -3.6068    4.8989    0.0000 C   0  0  0  0  0  0  0  0  0  0  0  0
   -3.6068    4.0739    0.0000 N   0  0  0  0  0  0  0  0  0  0  0  0
   -2.8924    3.6614    0.0000 C   0  0  0  0  0  0  0  0  0  0  0  0
   -2.1779    4.0739    0.0000 C   0  0  0  0  0  0  0  0  0  0  0  0
   -0.9257    6.6864    0.0000 O   0  0  0  0  0  0  0  0  0  0  0  0
   -0.9257    7.5114    0.0000 C   0  0  0  0  0  0  0  0  0  0  0  0
   -4.3213    3.6615    0.0000 C   0  0  0  0  0  0  0  0  0  0  0  0
   -1.3574    4.8913    0.0000 C   0  0  0  0  0  0  0  0  0  0  0  0
  1  6  2  0  0  0  0
  2  1  1  0  0  0  0
  3  2  2  0  0  0  0
  3 53  1  0  0  0  0
  4  3  1  0  0  0  0
  4 10  1  0  0  0  0
  5  4  2  0  0  0  0
  6  5  1  0  0  0  0
  7  5  1  0  0  0  0
  8  7  1  0  0  0  0
  9  8  1  0  0  0  0
 10  9  1  0  0  0  0
 11 10  1  0  0  0  0
 12 11  1  0  0  0  0
 13 12  1  0  0  0  0
 14 12  1  0  0  0  0
 15  9  1  0  0  0  0
 16 38  1  0  0  0  0
 17  2  1  0  0  0  0
 18 17  1  0  0  0  0
 19 18  1  0  0  0  0
 19 20  2  0  0  0  0
 21 20  1  0  0  0  0
 21 22  2  0  0  0  0
 22 27  1  0  0  0  0
 23 18  2  0  0  0  0
 23 22  1  0  0  0  0
 24 23  1  0  0  0  0
 25 24  1  0  0  0  0
 26 25  1  0  0  0  0
 27 26  1  0  0  0  0
 28 25  1  0  0  0  0
 29 24  1  0  0  0  0
 30 29  1  0  0  0  0
 30 36  1  0  0  0  0
 31 30  1  0  0  0  0
 32 20  1  0  0  0  0
 33 32  1  0  0  0  0
 34 19  1  0  0  0  0
 34 54  1  0  0  0  0
 35  1  1  0  0  0  0
 35 67  1  0  0  0  0
 37 41  1  0  0  0  0
 37 16  2  0  0  0  0
 38 39  2  0  0  0  0
 38 46  1  0  0  0  0
 39 40  1  0  0  0  0
 40 41  2  0  0  0  0
 40 43  1  0  0  0  0
 42 45  1  0  0  0  0
 42 41  1  0  0  0  0
 42 48  1  0  0  0  0
 43 44  1  0  0  0  0
 44 45  1  0  0  0  0
 45 47  1  0  0  0  0
 46 52  1  0  0  0  0
 48 49  1  0  0  0  0
 49 50  1  0  0  0  0
 49 51  1  0  0  0  0
 53 16  1  0  0  0  0
 54 55  2  0  0  0  0
 54 59  1  0  0  0  0
 55 56  1  0  0  0  0
 55 64  1  0  0  0  0
 56 57  2  0  0  0  0
 57 58  1  0  0  0  0
 58 59  2  0  0  0  0
 58 60  1  0  0  0  0
 59 63  1  0  0  0  0
 60 61  1  0  0  0  0
 61 62  1  0  0  0  0
 61 66  1  0  0  0  0
 62 63  1  0  0  0  0
 64 65  1  0  0  0  0
M  END
12
 

 54 60  0  0  0  0  0  0  0  0999 V2000
    0.1383    0.2159    0.0000 C   0  0  0  0  0  0  0  0  0  0  0  0
   -0.5761    0.6284    0.0000 C   0  0  0  0  0  0  0  0  0  0  0  0
   -0.5761    1.4534    0.0000 C   0  0  0  0  0  0  0  0  0  0  0  0
   -1.2906    1.8659    0.0000 C   0  0  0  0  0  0  0  0  0  0  0  0
   -2.0051    1.4534    0.0000 C   0  0  0  0  0  0  0  0  0  0  0  0
   -2.0051    0.6284    0.0000 C   0  0  0  0  0  0  0  0  0  0  0  0
   -1.2906    0.2159    0.0000 C   0  0  0  0  0  0  0  0  0  0  0  0
   -1.2906   -0.6091    0.0000 C   0  0  0  0  0  0  0  0  0  0  0  0
   -2.0051   -1.0216    0.0000 C   0  0  0  0  0  0  0  0  0  0  0  0
   -2.7195   -0.6091    0.0000 C   0  0  0  0  0  0  0  0  0  0  0  0
   -3.4340   -1.0216    0.0000 C   0  0  0  0  0  0  0  0  0  0  0  0
   -4.1485   -0.6091    0.0000 C   0  0  0  0  0  0  0  0  0  0  0  0
   -4.1485    0.2159    0.0000 C   0  0  0  0  0  0  0  0  0  0  0  0
   -3.4340    0.6284    0.0000 C   0  0  0  0  0  0  0  0  0  0  0  0
   -2.7195    0.2159    0.0000 C   0  0  0  0  0  0  0  0  0  0  0  0
   -0.5761   -1.0216    0.0000 C   0  0  0  0  0  0  0  0  0  0  0  0
    0.1383   -0.6091    0.0000 C   0  0  0  0  0  0  0  0  0  0  0  0
    0.8528   -1.0216    0.0000 C   0  0  0  0  0  0  0  0  0  0  0  0
    1.5673   -0.6091    0.0000 C   0  0  0  0  0  0  0  0  0  0  0  0
    2.2818   -1.0216    0.0000 C   0  0  0  0  0  0  0  0  0  0  0  0
    2.2818   -1.8466    0.0000 C   0  0  0  0  0  0  0  0  0  0  0  0
    2.9962   -2.2591    0.0000 C   0  0  0  0  0  0  0  0  0  0  0  0
    3.7107   -1.8466    0.0000 C   0  0  0  0  0  0  0  0  0  0  0  0
    1.5673   -2.2591    0.0000 C   0  0  0  0  0  0  0  0  0  0  0  0
    0.8528   -1.8466    0.0000 C   0  0  0  0  0  0  0  0  0  0  0  0
   -0.5761   -1.8466    0.0000 C   0  0  0  0  0  0  0  0  0  0  0  0
    0.1383   -2.2591    0.0000 C   0  0  0  0  0  0  0  0  0  0  0  0
    0.1383   -3.0841    0.0000 C   0  0  0  0  0  0  0  0  0  0  0  0
   -0.5761   -3.4966    0.0000 C   0  0  0  0  0  0  0  0  0  0  0  0
   -1.2906   -3.0841    0.0000 C   0  0  0  0  0  0  0  0  0  0  0  0
   -1.2906   -2.2591    0.0000 C   0  0  0  0  0  0  0  0  0  0  0  0
   -2.0051   -1.8466    0.0000 C   0  0  0  0  0  0  0  0  0  0  0  0
    4.4252   -2.2591    0.0000 C   0  0  0  0  0  0  0  0  0  0  0  0
    5.1396   -1.8466    0.0000 C   0  0  0  0  0  0  0  0  0  0  0  0
    5.8541   -2.2591    0.0000 C   0  0  0  0  0  0  0  0  0  0  0  0
    4.4252   -3.0841    0.0000 C   0  0  0  0  0  0  0  0  0  0  0  0
    3.7107   -3.4966    0.0000 C   0  0  0  0  0  0  0  0  0  0  0  0
    2.9962   -3.0841    0.0000 C   0  0  0  0  0  0  0  0  0  0  0  0
    2.2817   -3.4966    0.0000 C   0  0  0  0  0  0  0  0  0  0  0  0
    2.2817   -4.3216    0.0000 C   0  0  0  0  0  0  0  0  0  0  0  0
    2.9962   -4.7341    0.0000 C   0  0  0  0  0  0  0  0  0  0  0  0
    3.7107   -4.3216    0.0000 C   0  0  0  0  0  0  0  0  0  0  0  0
    5.8541   -3.0841    0.0000 C   0  0  0  0  0  0  0  0  0  0  0  0
    3.7107   -1.0216    0.0000 C   0  0  0  0  0  0  0  0  0  0  0  0
    4.4252   -0.6090    0.0000 C   0  0  0  0  0  0  0  0  0  0  0  0
    4.4252    0.2160    0.0000 C   0  0  0  0  0  0  0  0  0  0  0  0
    3.7107    0.6285    0.0000 C   0  0  0  0  0  0  0  0  0  0  0  0
    2.9962    0.2160    0.0000 C   0  0  0  0  0  0  0  0  0  0  0  0
    2.9962   -0.6090    0.0000 C   0  0  0  0  0  0  0  0  0  0  0  0
    5.1396   -1.0215    0.0000 C   0  0  0  0  0  0  0  0  0  0  0  0
    5.8541   -0.6090    0.0000 C   0  0  0  0  0  0  0  0  0  0  0  0
    6.5686   -1.0215    0.0000 C   0  0  0  0  0  0  0  0  0  0  0  0
    6.5686   -1.8465    0.0000 C   0  0  0  0  0  0  0  0  0  0  0  0
    2.1712   -0.6090    0.0000 C   0  0  0  0  0  0  0  0  0  0  0  0
  1  2  1  0  0  0  0
  2  3  2  0  0  0  0
  2  7  1  0  0  0  0
  3  4  1  0  0  0  0
  4  5  2  0  0  0  0
  5  6  1  0  0  0  0
  6  7  2  0  0  0  0
  7  8  1  0  0  0  0
  8  9  1  0  0  0  0
  8 16  2  0  0  0  0
  9 10  1  0  0  0  0
 10 11  2  0  0  0  0
 10 15  1  0  0  0  0
 11 12  1  0  0  0  0
 12 13  2  0  0  0  0
 13 14  1  0  0  0  0
 14 15  2  0  0  0  0
 16 17  1  0  0  0  0
 16 26  1  0  0  0  0
 17 18  1  0  0  0  0
 18 19  2  0  0  0  0
 18 25  1  0  0  0  0
 19 20  1  0  0  0  0
 20 21  2  0  0  0  0
 21 22  1  0  0  0  0
 21 24  1  0  0  0  0
 22 23  1  0  0  0  0
 23 33  2  0  0  0  0
 23 44  1  0  0  0  0
 24 25  2  0  0  0  0
 26 27  2  0  0  0  0
 26 31  1  0  0  0  0
 27 28  1  0  0  0  0
 28 29  2  0  0  0  0
 29 30  1  0  0  0  0
 30 31  2  0  0  0  0
 31 32  1  0  0  0  0
 33 34  1  0  0  0  0
 33 36  1  0  0  0  0
 34 50  2  0  0  0  0
 35 53  2  0  0  0  0
 35 34  1  0  0  0  0
 35 43  1  0  0  0  0
 36 37  1  0  0  0  0
 37 38  2  0  0  0  0
 37 42  1  0  0  0  0
 38 39  1  0  0  0  0
 39 40  2  0  0  0  0
 40 41  1  0  0  0  0
 41 42  2  0  0  0  0
 44 45  2  0  0  0  0
 44 49  1  0  0  0  0
 45 46  1  0  0  0  0
 46 47  2  0  0  0  0
 47 48  1  0  0  0  0
 48 49  2  0  0  0  0
 49 54  1  0  0  0  0
 50 51  1  0  0  0  0
 51 52  2  0  0  0  0
 52 53  1  0  0  0  0
M  END
13
 

 45 48  0  0  0  0  0  0  0  0999 V2000
   -1.5192   -0.8984    0.0000 C   0  0  0  0  0  0  0  0  0  0  0  0
   -1.5192   -2.2419    0.0000 C   0  0  0  0  0  0  0  0  0  0  0  0
   -1.5192    0.4452    0.0000 C   0  0  0  0  0  0  0  0  0  0  0  0
   -0.6942   -0.8984    0.0000 C   0  0  0  0  0  0  0  0  0  0  0  0
   -2.3442   -0.8984    0.0000 C   0  0  0  0  0  0  0  0  0  0  0  0
   -0.8047    0.8577    0.0000 C   0  0  0  0  0  0  0  0  0  0  0  0
   -0.8047    1.6827    0.0000 C   0  0  0  0  0  0  0  0  0  0  0  0
   -1.5192    2.0952    0.0000 C   0  0  0  0  0  0  0  0  0  0  0  0
   -2.2336    1.6827    0.0000 C   0  0  0  0  0  0  0  0  0  0  0  0
   -2.2336    0.8577    0.0000 C   0  0  0  0  0  0  0  0  0  0  0  0
   -2.7567   -0.1839    0.0000 C   0  0  0  0  0  0  0  0  0  0  0  0
   -3.5817   -0.1839    0.0000 C   0  0  0  0  0  0  0  0  0  0  0  0
   -3.9942   -0.8984    0.0000 C   0  0  0  0  0  0  0  0  0  0  0  0
   -3.5817   -1.6128    0.0000 C   0  0  0  0  0  0  0  0  0  0  0  0
   -2.7567   -1.6128    0.0000 C   0  0  0  0  0  0  0  0  0  0  0  0
   -2.3442   -2.1859    0.0000 F   0  0  0  0  0  0  0  0  0  0  0  0
   -2.3678    0.3891    0.0000 F   0  0  0  0  0  0  0  0  0  0  0  0
   -0.2817   -1.6128    0.0000 C   0  0  0  0  0  0  0  0  0  0  0  0
    0.5434   -1.6128    0.0000 C   0  0  0  0  0  0  0  0  0  0  0  0
    0.9559   -0.8984    0.0000 C   0  0  0  0  0  0  0  0  0  0  0  0
    0.5434   -0.1839    0.0000 C   0  0  0  0  0  0  0  0  0  0  0  0
   -0.2817   -0.1839    0.0000 C   0  0  0  0  0  0  0  0  0  0  0  0
   -0.7177    0.3891    0.0000 F   0  0  0  0  0  0  0  0  0  0  0  0
   -0.7177   -2.1623    0.0000 F   0  0  0  0  0  0  0  0  0  0  0  0
   -2.2336   -2.6544    0.0000 C   0  0  0  0  0  0  0  0  0  0  0  0
   -2.2336   -3.4795    0.0000 C   0  0  0  0  0  0  0  0  0  0  0  0
   -1.5192   -3.8920    0.0000 C   0  0  0  0  0  0  0  0  0  0  0  0
   -0.8047   -3.4795    0.0000 C   0  0  0  0  0  0  0  0  0  0  0  0
   -0.8047   -2.6544    0.0000 C   0  0  0  0  0  0  0  0  0  0  0  0
   -2.9481    0.4452    0.0000 F   0  0  0  0  0  0  0  0  0  0  0  0
   -0.0902    0.4452    0.0000 F   0  0  0  0  0  0  0  0  0  0  0  0
   -2.9481   -2.2419    0.0000 F   0  0  0  0  0  0  0  0  0  0  0  0
   -0.0902   -2.2419    0.0000 F   0  0  0  0  0  0  0  0  0  0  0  0
   -2.9481    2.0952    0.0000 C   0  0  0  0  0  0  0  0  0  0  0  0
   -1.5192    2.9202    0.0000 C   0  0  0  0  0  0  0  0  0  0  0  0
   -0.0902    2.0952    0.0000 C   0  0  0  0  0  0  0  0  0  0  0  0
    0.9559    0.5306    0.0000 C   0  0  0  0  0  0  0  0  0  0  0  0
    1.7809   -0.8984    0.0000 C   0  0  0  0  0  0  0  0  0  0  0  0
    0.9559   -2.3273    0.0000 C   0  0  0  0  0  0  0  0  0  0  0  0
   -0.0902   -3.8920    0.0000 C   0  0  0  0  0  0  0  0  0  0  0  0
   -1.5192   -4.7170    0.0000 C   0  0  0  0  0  0  0  0  0  0  0  0
   -2.9481   -3.8920    0.0000 C   0  0  0  0  0  0  0  0  0  0  0  0
   -4.8192   -0.8984    0.0000 C   0  0  0  0  0  0  0  0  0  0  0  0
   -3.9942    0.5306    0.0000 C   0  0  0  0  0  0  0  0  0  0  0  0
   -3.9942   -2.3273    0.0000 C   0  0  0  0  0  0  0  0  0  0  0  0
  1  2  1  0  0  0  0
  1  3  1  0  0  0  0
  1  4  1  0  0  0  0
  1  5  1  0  0  0  0
  2 25  2  0  0  0  0
  2 29  1  0  0  0  0
  3  6  2  0  0  0  0
  3 10  1  0  0  0  0
  4 18  2  0  0  0  0
  4 22  1  0  0  0  0
  5 11  2  0  0  0  0
  5 15  1  0  0  0  0
  6  7  1  0  0  0  0
  6 31  1  0  0  0  0
  7  8  2  0  0  0  0
  7 36  1  0  0  0  0
  8  9  1  0  0  0  0
  8 35  1  0  0  0  0
  9 10  2  0  0  0  0
  9 34  1  0  0  0  0
 10 30  1  0  0  0  0
 11 12  1  0  0  0  0
 11 17  1  0  0  0  0
 12 13  2  0  0  0  0
 12 44  1  0  0  0  0
 13 14  1  0  0  0  0
 13 43  1  0  0  0  0
 14 15  2  0  0  0  0
 14 45  1  0  0  0  0
 15 16  1  0  0  0  0
 18 19  1  0  0  0  0
 18 24  1  0  0  0  0
 19 20  2  0  0  0  0
 19 39  1  0  0  0  0
 20 21  1  0  0  0  0
 20 38  1  0  0  0  0
 21 22  2  0  0  0  0
 21 37  1  0  0  0  0
 22 23  1  0  0  0  0
 25 26  1  0  0  0  0
 25 32  1  0  0  0  0
 26 27  2  0  0  0  0
 26 42  1  0  0  0  0
 27 28  1  0  0  0  0
 27 41  1  0  0  0  0
 28 29  2  0  0  0  0
 28 40  1  0  0  0  0
 29 33  1  0  0  0  0
M  END
14
 

 46 52  0  0  0  0  0  0  0  0999 V2000
   -1.4295    1.6463    0.0000 N   0  0  3  0  0  0  0  0  0  0  0  0
   -1.4295    0.8223    0.0000 C   0  0  0  0  0  0  0  0  0  0  0  0
   -0.0010    1.6463    0.0000 C   0  0  0  0  0  0  0  0  0  0  0  0
   -0.7162    2.0602    0.0000 C   0  0  3  0  0  0  0  0  0  0  0  0
    1.4275    0.8223    0.0000 C   0  0  0  0  0  0  0  0  0  0  0  0
    1.4275    1.6463    0.0000 C   0  0  0  0  0  0  0  0  0  0  0  0
    0.7123    2.0602    0.0000 N   0  0  0  0  0  0  0  0  0  0  0  0
    1.4275   -0.8295    0.0000 C   0  0  0  0  0  0  0  0  0  0  0  0
    2.1427   -0.4156    0.0000 C   0  0  3  0  0  0  0  0  0  0  0  0
    2.1427    0.4103    0.0000 N   0  0  3  0  0  0  0  0  0  0  0  0
   -2.1429    0.4103    0.0000 C   0  0  3  0  0  0  0  0  0  0  0  0
   -2.1429   -0.4156    0.0000 N   0  0  3  0  0  0  0  0  0  0  0  0
   -1.4295   -0.8277    0.0000 C   0  0  0  0  0  0  0  0  0  0  0  0
   -1.4295   -1.6499    0.0000 C   0  0  0  0  0  0  0  0  0  0  0  0
   -0.7179   -2.0601    0.0000 N   0  0  0  0  0  0  0  0  0  0  0  0
   -0.0046   -1.6499    0.0000 C   0  0  0  0  0  0  0  0  0  0  0  0
    0.7123   -2.0692    0.0000 C   0  0  3  0  0  0  0  0  0  0  0  0
    1.4275   -1.6553    0.0000 N   0  0  3  0  0  0  0  0  0  0  0  0
   -2.8572   -0.8273    0.0000 C   0  0  0  0  0  0  0  0  0  0  0  0
   -3.5717   -0.4148    0.0000 C   0  0  0  0  0  0  0  0  0  0  0  0
   -3.5717    0.4102    0.0000 C   0  0  0  0  0  0  0  0  0  0  0  0
   -2.8572    0.8227    0.0000 C   0  0  0  0  0  0  0  0  0  0  0  0
    2.8572   -0.8282    0.0000 C   0  0  0  0  0  0  0  0  0  0  0  0
    3.5717   -0.4157    0.0000 C   0  0  0  0  0  0  0  0  0  0  0  0
    3.5717    0.4093    0.0000 C   0  0  0  0  0  0  0  0  0  0  0  0
    2.8572    0.8218    0.0000 C   0  0  0  0  0  0  0  0  0  0  0  0
   -2.1447    2.0572    0.0000 C   0  0  0  0  0  0  0  0  0  0  0  0
   -2.1466    2.8822    0.0000 C   0  0  0  0  0  0  0  0  0  0  0  0
   -1.4330    3.2963    0.0000 C   0  0  0  0  0  0  0  0  0  0  0  0
   -0.7177    2.8853    0.0000 C   0  0  0  0  0  0  0  0  0  0  0  0
    0.7132   -2.8943    0.0000 C   0  0  0  0  0  0  0  0  0  0  0  0
    1.4281   -3.3060    0.0000 C   0  0  0  0  0  0  0  0  0  0  0  0
    2.1421   -2.8928    0.0000 C   0  0  0  0  0  0  0  0  0  0  0  0
    2.1413   -2.0678    0.0000 C   0  0  0  0  0  0  0  0  0  0  0  0
    0.7119    2.8852    0.0000 C   0  0  0  0  0  0  0  0  0  0  0  0
    1.4261    3.2981    0.0000 C   0  0  0  0  0  0  0  0  0  0  0  0
    1.4256    4.1231    0.0000 C   0  0  0  0  0  0  0  0  0  0  0  0
    0.7109    4.5352    0.0000 C   0  0  0  0  0  0  0  0  0  0  0  0
   -0.0033    4.1223    0.0000 C   0  0  0  0  0  0  0  0  0  0  0  0
   -0.0027    3.2973    0.0000 C   0  0  0  0  0  0  0  0  0  0  0  0
   -0.7184   -2.8851    0.0000 C   0  0  0  0  0  0  0  0  0  0  0  0
   -1.4330   -3.2972    0.0000 C   0  0  0  0  0  0  0  0  0  0  0  0
   -1.4336   -4.1223    0.0000 C   0  0  0  0  0  0  0  0  0  0  0  0
   -0.7194   -4.5352    0.0000 C   0  0  0  0  0  0  0  0  0  0  0  0
   -0.0047   -4.1231    0.0000 C   0  0  0  0  0  0  0  0  0  0  0  0
   -0.0042   -3.2981    0.0000 C   0  0  0  0  0  0  0  0  0  0  0  0
  1  2  1  0  0  0  0
  1  4  1  0  0  0  0
  1 27  1  0  0  0  0
  2 11  1  0  0  0  0
  3  4  1  0  0  0  0
  3  7  1  0  0  0  0
  4 30  1  0  0  0  0
  5  6  1  0  0  0  0
  5 10  1  0  0  0  0
  6  7  1  0  0  0  0
  7 35  1  0  0  0  0
  8  9  1  0  0  0  0
  8 18  1  0  0  0  0
  9 10  1  0  0  0  0
  9 23  1  0  0  0  0
 10 26  1  0  0  0  0
 11 12  1  0  0  0  0
 11 22  1  0  0  0  0
 12 13  1  0  0  0  0
 12 19  1  0  0  0  0
 13 14  1  0  0  0  0
 14 15  1  0  0  0  0
 15 16  1  0  0  0  0
 15 41  1  0  0  0  0
 16 17  1  0  0  0  0
 17 18  1  0  0  0  0
 17 31  1  0  0  0  0
 18 34  1  0  0  0  0
 19 20  1  0  0  0  0
 20 21  1  0  0  0  0
 21 22  1  0  0  0  0
 23 24  1  0  0  0  0
 24 25  1  0  0  0  0
 25 26  1  0  0  0  0
 27 28  1  0  0  0  0
 28 29  1  0  0  0  0
 29 30  1  0  0  0  0
 31 32  1  0  0  0  0
 32 33  1  0  0  0  0
 33 34  1  0  0  0  0
 35 36  1  0  0  0  0
 35 40  2  0  0  0  0
 36 37  2  0  0  0  0
 37 38  1  0  0  0  0
 38 39  2  0  0  0  0
 39 40  1  0  0  0  0
 41 42  1  0  0  0  0
 41 46  2  0  0  0  0
 42 43  2  0  0  0  0
 43 44  1  0  0  0  0
 44 45  2  0  0  0  0
 45 46  1  0  0  0  0
M  END
15
 

 25 26  0  0  0  0  0  0  0  0999 V2000
   -1.9260    1.9099    0.0000 C   0  0  0  0  0  0  0  0  0  0  0  0
   -2.6557    1.9049    0.0000 C   0  0  0  0  0  0  0  0  0  0  0  0
   -3.1015    2.5355    0.0000 C   0  0  0  0  0  0  0  0  0  0  0  0
   -3.8397    2.3309    0.0000 C   0  0  3  0  0  0  0  0  0  0  0  0
   -4.3979    2.7930    0.0000 C   0  0  0  0  0  0  0  0  0  0  0  0
   -5.1280    2.6397    0.0000 C   0  0  0  0  0  0  0  0  0  0  0  0
   -5.4618    1.9762    0.0000 C   0  0  0  0  0  0  0  0  0  0  0  0
   -5.0998    1.3138    0.0000 C   0  0  0  0  0  0  0  0  0  0  0  0
   -4.3622    1.2580    0.0000 C   0  0  0  0  0  0  0  0  0  0  0  0
   -3.9725    0.6210    0.0000 C   0  0  0  0  0  0  0  0  0  0  0  0
   -3.2515    0.5129    0.0000 C   0  0  0  0  0  0  0  0  0  0  0  0
   -2.6503    1.0057    0.0000 C   0  0  0  0  0  0  0  0  0  0  0  0
   -1.9787    0.6544    0.0000 C   0  0  0  0  0  0  0  0  0  0  0  0
   -1.2838    0.7403    0.0000 C   0  0  0  0  0  0  0  0  0  0  0  0
   -0.6946    1.1669    0.0000 C   0  0  3  0  0  0  0  0  0  0  0  0
   -0.4562    1.8523    0.0000 C   0  0  3  0  0  0  0  0  0  0  0  0
   -0.7875    2.5193    0.0000 C   0  0  0  0  0  0  0  0  0  0  0  0
   -1.5480    2.5724    0.0000 C   0  0  0  0  0  0  0  0  0  0  0  0
    0.3502    1.9139    0.0000 C   0  0  0  0  0  0  0  0  0  0  0  0
   -0.0190    0.6623    0.0000 C   0  0  0  0  0  0  0  0  0  0  0  0
   -5.4910    0.6624    0.0000 C   0  0  0  0  0  0  0  0  0  0  0  0
   -6.2506    0.6610    0.0000 C   0  0  0  0  0  0  0  0  0  0  0  0
   -6.6193    1.3309    0.0000 C   0  0  0  0  0  0  0  0  0  0  0  0
   -6.2378    1.9747    0.0000 C   0  0  0  0  0  0  0  0  0  0  0  0
   -3.9100    1.5774    0.0000 C   0  0  0  0  0  0  0  0  0  0  0  0
  1 18  1  0  0  0  0
  1  2  2  0  0  0  0
  3  2  1  0  0  0  0
  4  3  1  0  0  0  0
  5  4  1  0  0  0  0
  5  6  2  0  0  0  0
  7  6  1  0  0  0  0
  7 24  2  0  0  0  0
  8  7  1  0  0  0  0
  9  8  1  0  0  0  0
 10  9  1  0  0  0  0
 11 10  1  0  0  0  0
 11 12  2  0  0  0  0
 13 12  1  0  0  0  0
 13 14  2  0  0  0  0
 15 14  1  0  0  0  0
 16 15  1  0  0  0  0
 17 16  1  0  0  0  0
 17 18  2  0  0  0  0
 19 16  1  0  0  0  0
 20 15  1  0  0  0  0
 21  8  2  0  0  0  0
 22 21  1  0  0  0  0
 23 22  2  0  0  0  0
 24 23  1  0  0  0  0
 25  4  1  0  0  0  0
M  END
16
 

 46 52  0  0  0  0  0  0  0  0999 V2000
   -2.6125    4.9893    0.0000 C   0  0  0  0  0  0  0  0  0  0  0  0
   -3.3270    4.5768    0.0000 C   0  0  0  0  0  0  0  0  0  0  0  0
   -3.3270    3.7518    0.0000 C   0  0  0  0  0  0  0  0  0  0  0  0
   -2.6125    3.3393    0.0000 C   0  0  0  0  0  0  0  0  0  0  0  0
   -1.8980    3.7518    0.0000 C   0  0  3  0  0  0  0  0  0  0  0  0
   -1.8980    4.5768    0.0000 C   0  0  3  0  0  0  0  0  0  0  0  0
   -1.1836    3.3393    0.0000 C   0  0  3  0  0  0  0  0  0  0  0  0
   -0.4691    3.7517    0.0000 C   0  0  0  0  0  0  0  0  0  0  0  0
   -0.4691    4.5767    0.0000 C   0  0  0  0  0  0  0  0  0  0  0  0
   -1.1836    4.9893    0.0000 C   0  0  0  0  0  0  0  0  0  0  0  0
   -3.1959    5.5727    0.0000 C   0  0  0  0  0  0  0  0  0  0  0  0
   -2.0291    5.5727    0.0000 C   0  0  0  0  0  0  0  0  0  0  0  0
   -1.8980    2.9268    0.0000 C   0  0  0  0  0  0  0  0  0  0  0  0
    0.2454    3.3392    0.0000 O   0  0  0  0  0  0  0  0  0  0  0  0
   -1.5961    2.6248    0.0000 C   0  0  0  0  0  0  0  0  0  0  0  0
   -0.7711    2.6248    0.0000 C   0  0  0  0  0  0  0  0  0  0  0  0
   -2.3105    2.2123    0.0000 C   0  0  0  0  0  0  0  0  0  0  0  0
   -2.3105    1.3873    0.0000 C   0  0  0  0  0  0  0  0  0  0  0  0
   -0.0566    2.2123    0.0000 C   0  0  0  0  0  0  0  0  0  0  0  0
   -0.0566    1.3873    0.0000 C   0  0  0  0  0  0  0  0  0  0  0  0
   -1.5961    0.9748    0.0000 C   0  0  0  0  0  0  0  0  0  0  0  0
   -1.1836   -1.3897    0.0000 C   0  0  0  0  0  0  0  0  0  0  0  0
   -1.8980   -0.9772    0.0000 C   0  0  0  0  0  0  0  0  0  0  0  0
   -1.8980   -0.1522    0.0000 C   0  0  0  0  0  0  0  0  0  0  0  0
   -1.1836    0.2603    0.0000 C   0  0  3  0  0  0  0  0  0  0  0  0
   -0.4691   -0.1522    0.0000 C   0  0  3  0  0  0  0  0  0  0  0  0
   -0.4691   -0.9772    0.0000 C   0  0  3  0  0  0  0  0  0  0  0  0
    0.2454    0.2603    0.0000 C   0  0  0  0  0  0  0  0  0  0  0  0
    0.9599   -0.1522    0.0000 C   0  0  0  0  0  0  0  0  0  0  0  0
    0.9599   -0.9772    0.0000 C   0  0  0  0  0  0  0  0  0  0  0  0
    0.2454   -1.3897    0.0000 C   0  0  0  0  0  0  0  0  0  0  0  0
   -0.4691    0.6728    0.0000 C   0  0  0  0  0  0  0  0  0  0  0  0
   -0.7711    0.9748    0.0000 C   0  0  0  0  0  0  0  0  0  0  0  0
   -3.0250    2.6248    0.0000 O   0  0  0  0  0  0  0  0  0  0  0  0
   -3.7395    2.2123    0.0000 C   0  0  0  0  0  0  0  0  0  0  0  0
   -3.7395    1.3873    0.0000 C   0  0  0  0  0  0  0  0  0  0  0  0
   -3.0250    0.9748    0.0000 C   0  0  0  0  0  0  0  0  0  0  0  0
    0.6579    0.9748    0.0000 O   0  0  0  0  0  0  0  0  0  0  0  0
    1.3724    1.3873    0.0000 C   0  0  0  0  0  0  0  0  0  0  0  0
    1.3724    2.2123    0.0000 C   0  0  0  0  0  0  0  0  0  0  0  0
    0.6579    2.6248    0.0000 C   0  0  0  0  0  0  0  0  0  0  0  0
    0.6579    3.4498    0.0000 O   0  0  0  0  0  0  0  0  0  0  0  0
   -3.0250    0.1498    0.0000 O   0  0  0  0  0  0  0  0  0  0  0  0
   -2.6125    0.2603    0.0000 O   0  0  0  0  0  0  0  0  0  0  0  0
   -0.3380   -1.9730    0.0000 C   0  0  0  0  0  0  0  0  0  0  0  0
    0.8288   -1.9730    0.0000 C   0  0  0  0  0  0  0  0  0  0  0  0
  1  2  1  0  0  0  0
  1  6  1  0  0  0  0
  1 11  1  0  0  0  0
  1 12  1  0  0  0  0
  2  3  1  0  0  0  0
  3  4  1  0  0  0  0
  4  5  1  0  0  0  0
  5  6  1  0  0  0  0
  5  7  1  0  0  0  0
  5 13  1  0  0  0  0
  6 10  1  0  0  0  0
  7  8  1  0  0  0  0
  7 15  1  0  0  0  0
  7 16  1  0  0  0  0
  8  9  1  0  0  0  0
  8 14  2  0  0  0  0
  9 10  1  0  0  0  0
 15 17  1  0  0  0  0
 16 19  1  0  0  0  0
 17 18  2  0  0  0  0
 18 21  1  0  0  0  0
 19 20  2  0  0  0  0
 19 41  1  0  0  0  0
 20 38  1  0  0  0  0
 22 23  1  0  0  0  0
 22 27  1  0  0  0  0
 23 24  1  0  0  0  0
 24 25  1  0  0  0  0
 24 44  2  0  0  0  0
 25 26  1  0  0  0  0
 25 21  1  0  0  0  0
 25 33  1  0  0  0  0
 26 27  1  0  0  0  0
 26 28  1  0  0  0  0
 26 32  1  0  0  0  0
 27 31  1  0  0  0  0
 28 29  1  0  0  0  0
 29 30  1  0  0  0  0
 30 31  1  0  0  0  0
 31 45  1  0  0  0  0
 31 46  1  0  0  0  0
 33 20  1  0  0  0  0
 34 35  1  0  0  0  0
 34 17  1  0  0  0  0
 35 36  2  0  0  0  0
 36 37  1  0  0  0  0
 37 18  1  0  0  0  0
 37 43  2  0  0  0  0
 38 39  1  0  0  0  0
 39 40  2  0  0  0  0
 40 41  1  0  0  0  0
 41 42  2  0  0  0  0
M  END
17
 

 29 34  0  0  0  0  0  0  0  0999 V2000
    0.8155   -1.2680    0.0000 C   0  0  0  0  0  0  0  0  0  0  0  0
    0.2321   -0.6846    0.0000 N   0  0  3  0  0  0  0  0  0  0  0  0
   -0.5929   -0.6846    0.0000 C   0  0  3  0  0  0  0  0  0  0  0  0
   -1.1763   -1.2680    0.0000 C   0  0  0  0  0  0  0  0  0  0  0  0
   -1.1763   -2.0930    0.0000 C   0  0  0  0  0  0  0  0  0  0  0  0
   -0.5929   -2.6764    0.0000 C   0  0  0  0  0  0  0  0  0  0  0  0
    0.2321   -2.6764    0.0000 C   0  0  0  0  0  0  0  0  0  0  0  0
    0.8155   -2.0930    0.0000 C   0  0  0  0  0  0  0  0  0  0  0  0
   -0.8478    0.1000    0.0000 C   0  0  0  0  0  0  0  0  0  0  0  0
   -0.1804    0.5849    0.0000 C   0  0  3  0  0  0  0  0  0  0  0  0
    0.4870    0.1000    0.0000 C   0  0  3  0  0  0  0  0  0  0  0  0
    0.0745    1.3695    0.0000 C   0  0  3  0  0  0  0  0  0  0  0  0
    0.8995    1.3695    0.0000 C   0  0  0  0  0  0  0  0  0  0  0  0
    1.1544    0.5850    0.0000 C   0  0  0  0  0  0  0  0  0  0  0  0
   -0.9874    0.4133    0.0000 C   0  0  0  0  0  0  0  0  0  0  0  0
   -1.5395    1.0264    0.0000 N   0  0  3  0  0  0  0  0  0  0  0  0
   -1.2846    1.8110    0.0000 C   0  0  0  0  0  0  0  0  0  0  0  0
   -0.4776    1.9826    0.0000 C   0  0  0  0  0  0  0  0  0  0  0  0
    1.9794    0.5850    0.0000 O   0  0  0  0  0  0  0  0  0  0  0  0
    2.2343    1.3696    0.0000 C   0  0  0  0  0  0  0  0  0  0  0  0
    1.5669    1.8545    0.0000 C   0  0  0  0  0  0  0  0  0  0  0  0
   -2.2539    1.4389    0.0000 C   0  0  0  0  0  0  0  0  0  0  0  0
   -2.2539    2.2639    0.0000 C   0  0  0  0  0  0  0  0  0  0  0  0
   -1.5395    2.6764    0.0000 C   0  0  0  0  0  0  0  0  0  0  0  0
   -0.8250    2.2639    0.0000 C   0  0  0  0  0  0  0  0  0  0  0  0
   -0.1105    2.6764    0.0000 C   0  0  0  0  0  0  0  0  0  0  0  0
    0.7145    2.6764    0.0000 C   0  0  0  0  0  0  0  0  0  0  0  0
    1.4289    2.2639    0.0000 C   0  0  0  0  0  0  0  0  0  0  0  0
    2.2539    2.2639    0.0000 C   0  0  0  0  0  0  0  0  0  0  0  0
  1  2  1  0  0  0  0
  2  3  1  0  0  0  0
  2 11  1  0  0  0  0
  3  4  1  0  0  0  0
  3  9  1  0  0  0  0
  4  5  2  0  0  0  0
  5  6  1  0  0  0  0
  6  7  1  0  0  0  0
  7  8  1  0  0  0  0
  8  1  1  0  0  0  0
  9 10  1  0  0  0  0
 10 11  1  0  0  0  0
 10 12  1  0  0  0  0
 10 15  1  0  0  0  0
 11 14  1  0  0  0  0
 12 13  1  0  0  0  0
 12 18  1  0  0  0  0
 13 14  2  0  0  0  0
 13 21  1  0  0  0  0
 14 19  1  0  0  0  0
 15 16  1  0  0  0  0
 16 17  1  0  0  0  0
 16 22  1  0  0  0  0
 17 18  1  0  0  0  0
 19 20  1  0  0  0  0
 20 21  2  0  0  0  0
 22 23  1  0  0  0  0
 23 24  1  0  0  0  0
 24 25  1  0  0  0  0
 25 26  1  0  0  0  0
 26 27  2  0  0  0  0
 27 28  1  0  0  0  0
 28 29  1  0  0  0  0
 29 20  1  0  0  0  0
M  END
18
 

 28 32  0  0  0  0  0  0  0  0999 V2000
    1.5530    1.4747    0.0000 C   0  0  0  0  0  0  0  0  0  0  0  0
    0.8624    1.4747    0.0000 N   0  0  3  0  0  0  0  0  0  0  0  0
    0.8446    2.2923    0.0000 C   0  0  3  0  0  0  0  0  0  0  0  0
    0.0966    2.5551    0.0000 C   0  0  3  0  0  0  0  0  0  0  0  0
    0.7953    2.8738    0.0000 C   0  0  3  0  0  0  0  0  0  0  0  0
    1.5133    2.2919    0.0000 C   0  0  3  0  0  0  0  0  0  0  0  0
    2.1655    2.6758    0.0000 C   0  0  0  0  0  0  0  0  0  0  0  0
    1.4004    3.0236    0.0000 C   0  0  0  0  0  0  0  0  0  0  0  0
    1.4130    3.7899    0.0000 C   0  0  0  0  0  0  0  0  0  0  0  0
    2.0501    4.2581    0.0000 C   0  0  0  0  0  0  0  0  0  0  0  0
    1.9392    5.0514    0.0000 C   0  0  0  0  0  0  0  0  0  0  0  0
    1.2383    5.3748    0.0000 C   0  0  0  0  0  0  0  0  0  0  0  0
    0.5470    4.9787    0.0000 C   0  0  0  0  0  0  0  0  0  0  0  0
   -0.1238    5.4005    0.0000 C   0  0  0  0  0  0  0  0  0  0  0  0
   -0.8442    5.1187    0.0000 C   0  0  0  0  0  0  0  0  0  0  0  0
   -1.0227    4.3456    0.0000 C   0  0  0  0  0  0  0  0  0  0  0  0
   -0.4325    3.8193    0.0000 N   0  0  3  0  0  0  0  0  0  0  0  0
   -0.5369    3.0490    0.0000 C   0  0  0  0  0  0  0  0  0  0  0  0
    0.3113    4.1206    0.0000 C   0  0  0  0  0  0  0  0  0  0  0  0
    0.9141    3.6083    0.0000 C   0  0  0  0  0  0  0  0  0  0  0  0
   -0.6312    2.2144    0.0000 C   0  0  0  0  0  0  0  0  0  0  0  0
   -1.2576    2.6915    0.0000 C   0  0  0  0  0  0  0  0  0  0  0  0
   -1.9904    2.4473    0.0000 C   0  0  0  0  0  0  0  0  0  0  0  0
   -2.2479    1.7219    0.0000 C   0  0  0  0  0  0  0  0  0  0  0  0
   -1.8673    1.0537    0.0000 C   0  0  0  0  0  0  0  0  0  0  0  0
   -1.1194    0.8941    0.0000 C   0  0  0  0  0  0  0  0  0  0  0  0
   -0.5246    1.3946    0.0000 C   0  0  0  0  0  0  0  0  0  0  0  0
    0.2251    1.0674    0.0000 C   0  0  0  0  0  0  0  0  0  0  0  0
  1  6  1  0  0  0  0
  2  1  1  0  0  0  0
  2 28  1  0  0  0  0
  3  2  1  0  0  0  0
  3  8  1  0  0  0  0
  4  3  1  0  0  0  0
  4 18  1  0  0  0  0
  5  4  1  0  0  0  0
  5 20  1  0  0  0  0
  6  5  1  0  0  0  0
  7  6  1  0  0  0  0
  7  8  2  0  0  0  0
  9  8  1  0  0  0  0
 10  9  1  0  0  0  0
 11 10  1  0  0  0  0
 11 12  2  0  0  0  0
 13 12  1  0  0  0  0
 14 13  1  0  0  0  0
 15 14  1  0  0  0  0
 16 15  1  0  0  0  0
 17 16  1  0  0  0  0
 18 17  1  0  0  0  0
 19 17  1  0  0  0  0
 20 19  1  0  0  0  0
 21  4  1  0  0  0  0
 22 21  1  0  0  0  0
 23 22  1  0  0  0  0
 23 24  2  0  0  0  0
 25 24  1  0  0  0  0
 26 25  1  0  0  0  0
 27 26  1  0  0  0  0
 28 27  1  0  0  0  0
M  END
19
 

 44 51  0  0  0  0  0  0  0  0999 V2000
   -4.7850    3.2882    0.0000 C   0  0  0  0  0  0  0  0  0  0  0  0
   -5.4995    3.7007    0.0000 C   0  0  0  0  0  0  0  0  0  0  0  0
   -6.2140    3.2882    0.0000 C   0  0  0  0  0  0  0  0  0  0  0  0
   -6.2140    2.4632    0.0000 C   0  0  0  0  0  0  0  0  0  0  0  0
   -5.4995    2.0507    0.0000 C   0  0  0  0  0  0  0  0  0  0  0  0
   -4.7850    2.4632    0.0000 C   0  0  0  0  0  0  0  0  0  0  0  0
   -4.0706    2.0507    0.0000 C   0  0  0  0  0  0  0  0  0  0  0  0
   -3.3560    2.4632    0.0000 C   0  0  0  0  0  0  0  0  0  0  0  0
   -3.3560    3.2882    0.0000 C   0  0  0  0  0  0  0  0  0  0  0  0
   -4.0706    3.7007    0.0000 C   0  0  0  0  0  0  0  0  0  0  0  0
   -2.6416    2.0507    0.0000 O   0  0  0  0  0  0  0  0  0  0  0  0
   -1.9271    2.4632    0.0000 C   0  0  0  0  0  0  0  0  0  0  0  0
   -1.2126    3.7007    0.0000 C   0  0  0  0  0  0  0  0  0  0  0  0
   -1.9271    3.2882    0.0000 C   0  0  0  0  0  0  0  0  0  0  0  0
   -1.2126    2.0507    0.0000 C   0  0  0  0  0  0  0  0  0  0  0  0
   -0.4982    2.4632    0.0000 C   0  0  0  0  0  0  0  0  0  0  0  0
   -0.4982    3.2882    0.0000 C   0  0  0  0  0  0  0  0  0  0  0  0
   -1.2126    4.5257    0.0000 C   0  0  0  0  0  0  0  0  0  0  0  0
   -0.4982    4.9383    0.0000 C   0  0  0  0  0  0  0  0  0  0  0  0
    0.2163    4.5257    0.0000 C   0  0  0  0  0  0  0  0  0  0  0  0
    0.2163    3.7007    0.0000 C   0  0  0  0  0  0  0  0  0  0  0  0
   -1.9271    5.1268    0.0000 N   0  0  0  0  0  0  0  0  0  0  0  0
   -1.7981    5.9417    0.0000 C   0  0  3  0  0  0  0  0  0  0  0  0
   -2.5331    6.3162    0.0000 C   0  0  3  0  0  0  0  0  0  0  0  0
   -3.1165    5.7328    0.0000 N   0  0  0  0  0  0  0  0  0  0  0  0
   -2.7419    4.9978    0.0000 C   0  0  0  0  0  0  0  0  0  0  0  0
   -3.8883    6.1195    0.0000 C   0  0  0  0  0  0  0  0  0  0  0  0
   -4.0706    4.5257    0.0000 C   0  0  0  0  0  0  0  0  0  0  0  0
   -4.7850    4.9382    0.0000 N   0  0  3  0  0  0  0  0  0  0  0  0
   -4.6366    5.7129    0.0000 C   0  0  3  0  0  0  0  0  0  0  0  0
   -5.5644    4.6675    0.0000 C   0  0  0  0  0  0  0  0  0  0  0  0
   -6.1885    5.2071    0.0000 C   0  0  3  0  0  0  0  0  0  0  0  0
   -6.0332    6.0173    0.0000 C   0  0  3  0  0  0  0  0  0  0  0  0
   -5.2539    6.2880    0.0000 C   0  0  0  0  0  0  0  0  0  0  0  0
   -6.9678    4.9364    0.0000 C   0  0  0  0  0  0  0  0  0  0  0  0
   -6.6573    6.5569    0.0000 C   0  0  0  0  0  0  0  0  0  0  0  0
   -2.6622    7.1310    0.0000 C   0  0  0  0  0  0  0  0  0  0  0  0
   -3.1165    4.2627    0.0000 O   0  0  0  0  0  0  0  0  0  0  0  0
   -1.0630    6.3162    0.0000 C   0  0  0  0  0  0  0  0  0  0  0  0
   -0.3711    5.8669    0.0000 C   0  0  0  0  0  0  0  0  0  0  0  0
    0.3640    6.2415    0.0000 C   0  0  0  0  0  0  0  0  0  0  0  0
    0.4072    7.0653    0.0000 C   0  0  0  0  0  0  0  0  0  0  0  0
   -0.2847    7.5146    0.0000 C   0  0  0  0  0  0  0  0  0  0  0  0
   -1.0198    7.1401    0.0000 C   0  0  0  0  0  0  0  0  0  0  0  0
  1  2  2  0  0  0  0
  1  6  1  0  0  0  0
  1 10  1  0  0  0  0
  2  3  1  0  0  0  0
  3  4  2  0  0  0  0
  4  5  1  0  0  0  0
  5  6  2  0  0  0  0
  6  7  1  0  0  0  0
  7  8  2  0  0  0  0
  8  9  1  0  0  0  0
  8 11  1  0  0  0  0
  9 10  2  0  0  0  0
 10 28  1  0  0  0  0
 11 12  1  0  0  0  0
 12 15  2  0  0  0  0
 13 14  2  0  0  0  0
 13 17  1  0  0  0  0
 13 18  1  0  0  0  0
 14 12  1  0  0  0  0
 15 16  1  0  0  0  0
 16 17  2  0  0  0  0
 17 21  1  0  0  0  0
 18 19  2  0  0  0  0
 18 22  1  0  0  0  0
 19 20  1  0  0  0  0
 20 21  2  0  0  0  0
 22 23  1  0  0  0  0
 22 26  1  0  0  0  0
 23 24  1  0  0  0  0
 23 39  1  0  0  0  0
 24 25  1  0  0  0  0
 24 37  1  0  0  0  0
 25 26  1  0  0  0  0
 26 38  2  0  0  0  0
 27 30  1  0  0  0  0
 27 25  1  0  0  0  0
 28 29  1  0  0  0  0
 29 30  1  0  0  0  0
 29 31  1  0  0  0  0
 30 34  1  0  0  0  0
 31 32  1  0  0  0  0
 32 33  1  0  0  0  0
 32 35  1  0  0  0  0
 33 34  1  0  0  0  0
 33 36  1  0  0  0  0
 39 40  2  0  0  0  0
 39 44  1  0  0  0  0
 40 41  1  0  0  0  0
 41 42  2  0  0  0  0
 42 43  1  0  0  0  0
 43 44  2  0  0  0  0
M  END
20
 

 49 55  0  0  0  0  0  0  0  0999 V2000
   -6.6236    1.7615    0.0000 C   0  0  0  0  0  0  0  0  0  0  0  0
   -7.3380    1.3490    0.0000 C   0  0  3  0  0  0  0  0  0  0  0  0
   -8.0526    1.7615    0.0000 N   0  0  0  0  0  0  0  0  0  0  0  0
   -8.0526    2.5865    0.0000 C   0  0  0  0  0  0  0  0  0  0  0  0
   -7.3380    2.9990    0.0000 C   0  0  0  0  0  0  0  0  0  0  0  0
   -6.6236    2.5865    0.0000 C   0  0  0  0  0  0  0  0  0  0  0  0
   -5.9091    2.9990    0.0000 C   0  0  0  0  0  0  0  0  0  0  0  0
   -5.1946    2.5865    0.0000 C   0  0  0  0  0  0  0  0  0  0  0  0
   -5.1946    1.7615    0.0000 C   0  0  0  0  0  0  0  0  0  0  0  0
   -5.9091    1.3490    0.0000 C   0  0  0  0  0  0  0  0  0  0  0  0
   -7.3380    0.5240    0.0000 C   0  0  0  0  0  0  0  0  0  0  0  0
   -6.6235    0.1115    0.0000 C   0  0  0  0  0  0  0  0  0  0  0  0
   -5.9091    0.5240    0.0000 C   0  0  0  0  0  0  0  0  0  0  0  0
   -5.1946    0.1115    0.0000 C   0  0  0  0  0  0  0  0  0  0  0  0
   -5.1945   -0.7135    0.0000 C   0  0  0  0  0  0  0  0  0  0  0  0
   -5.9090   -1.1260    0.0000 C   0  0  0  0  0  0  0  0  0  0  0  0
   -6.6235   -0.7135    0.0000 C   0  0  0  0  0  0  0  0  0  0  0  0
   -4.4800   -1.1260    0.0000 O   0  0  0  0  0  0  0  0  0  0  0  0
   -4.2665   -1.9228    0.0000 C   0  0  0  0  0  0  0  0  0  0  0  0
   -3.4696   -2.1364    0.0000 C   0  0  0  0  0  0  0  0  0  0  0  0
   -3.2561   -2.9333    0.0000 C   0  0  0  0  0  0  0  0  0  0  0  0
   -3.8394   -3.5167    0.0000 C   0  0  0  0  0  0  0  0  0  0  0  0
   -4.6363   -3.3031    0.0000 C   0  0  0  0  0  0  0  0  0  0  0  0
   -4.8498   -2.5062    0.0000 C   0  0  0  0  0  0  0  0  0  0  0  0
   -2.7778   -1.6870    0.0000 C   0  0  3  0  0  0  0  0  0  0  0  0
   -2.1366   -2.2062    0.0000 N   0  0  0  0  0  0  0  0  0  0  0  0
   -2.4322   -2.9764    0.0000 C   0  0  0  0  0  0  0  0  0  0  0  0
   -3.0411   -0.7924    0.0000 C   0  0  0  0  0  0  0  0  0  0  0  0
   -3.5760    1.3518    0.0000 C   0  0  0  0  0  0  0  0  0  0  0  0
   -4.4801    1.3490    0.0000 O   0  0  0  0  0  0  0  0  0  0  0  0
   -2.8615    0.1142    0.0000 C   0  0  0  0  0  0  0  0  0  0  0  0
   -3.5760    0.5267    0.0000 C   0  0  0  0  0  0  0  0  0  0  0  0
   -2.8615    1.7643    0.0000 C   0  0  0  0  0  0  0  0  0  0  0  0
   -2.1470    1.3518    0.0000 C   0  0  0  0  0  0  0  0  0  0  0  0
   -2.1470    0.5267    0.0000 C   0  0  0  0  0  0  0  0  0  0  0  0
   -2.8615    2.5893    0.0000 O   0  0  0  0  0  0  0  0  0  0  0  0
   -4.4801    2.9990    0.0000 O   0  0  0  0  0  0  0  0  0  0  0  0
   -3.7656    2.5865    0.0000 C   0  0  0  0  0  0  0  0  0  0  0  0
   -8.4651    1.0470    0.0000 C   0  0  0  0  0  0  0  0  0  0  0  0
   -8.8494    1.9750    0.0000 C   0  0  0  0  0  0  0  0  0  0  0  0
   -5.9090   -1.9510    0.0000 O   0  0  0  0  0  0  0  0  0  0  0  0
   -4.4801    0.5240    0.0000 O   0  0  0  0  0  0  0  0  0  0  0  0
   -3.7656    0.1116    0.0000 C   0  0  0  0  0  0  0  0  0  0  0  0
   -6.6234   -2.3635    0.0000 C   0  0  0  0  0  0  0  0  0  0  0  0
   -5.6467   -2.2927    0.0000 O   0  0  0  0  0  0  0  0  0  0  0  0
   -5.2196   -3.8865    0.0000 O   0  0  0  0  0  0  0  0  0  0  0  0
   -6.0165   -3.6730    0.0000 C   0  0  0  0  0  0  0  0  0  0  0  0
   -1.7241   -1.4917    0.0000 C   0  0  0  0  0  0  0  0  0  0  0  0
   -1.3397   -2.4197    0.0000 C   0  0  0  0  0  0  0  0  0  0  0  0
  1  2  1  0  0  0  0
  1  6  2  0  0  0  0
  1 10  1  0  0  0  0
  2  3  1  0  0  0  0
  2 11  1  0  0  0  0
  3  4  1  0  0  0  0
  3 39  1  0  0  0  0
  3 40  1  0  0  0  0
  4  5  1  0  0  0  0
  5  6  1  0  0  0  0
  6  7  1  0  0  0  0
  7  8  2  0  0  0  0
  8  9  1  0  0  0  0
  8 37  1  0  0  0  0
  9 10  2  0  0  0  0
  9 30  1  0  0  0  0
 11 12  1  0  0  0  0
 12 13  2  0  0  0  0
 12 17  1  0  0  0  0
 13 14  1  0  0  0  0
 14 15  2  0  0  0  0
 14 42  1  0  0  0  0
 15 16  1  0  0  0  0
 15 18  1  0  0  0  0
 16 17  2  0  0  0  0
 16 41  1  0  0  0  0
 18 19  1  0  0  0  0
 19 20  2  0  0  0  0
 19 24  1  0  0  0  0
 20 21  1  0  0  0  0
 20 25  1  0  0  0  0
 21 22  2  0  0  0  0
 21 27  1  0  0  0  0
 22 23  1  0  0  0  0
 23 24  2  0  0  0  0
 23 46  1  0  0  0  0
 24 45  1  0  0  0  0
 25 26  1  0  0  0  0
 25 28  1  0  0  0  0
 26 27  1  0  0  0  0
 26 48  1  0  0  0  0
 26 49  1  0  0  0  0
 28 31  1  0  0  0  0
 29 33  1  0  0  0  0
 30 29  1  0  0  0  0
 31 32  1  0  0  0  0
 31 35  2  0  0  0  0
 32 29  2  0  0  0  0
 33 34  2  0  0  0  0
 33 36  1  0  0  0  0
 34 35  1  0  0  0  0
 37 38  1  0  0  0  0
 41 44  1  0  0  0  0
 42 43  1  0  0  0  0
 46 47  1  0  0  0  0
M  END
21
 

 50 55  0  0  0  0  0  0  0  0999 V2000
   -4.6750    4.8714    0.0000 C   0  0  0  0  0  0  0  0  0  0  0  0
   -5.3895    4.4589    0.0000 C   0  0  0  0  0  0  0  0  0  0  0  0
   -5.3895    3.6339    0.0000 C   0  0  0  0  0  0  0  0  0  0  0  0
   -4.6750    3.2214    0.0000 C   0  0  0  0  0  0  0  0  0  0  0  0
   -3.9605    3.6339    0.0000 C   0  0  0  0  0  0  0  0  0  0  0  0
   -3.9605    4.4589    0.0000 C   0  0  0  0  0  0  0  0  0  0  0  0
   -6.1040    4.8714    0.0000 C   0  0  0  0  0  0  0  0  0  0  0  0
   -6.1040    5.6964    0.0000 C   0  0  0  0  0  0  0  0  0  0  0  0
   -5.3895    6.1089    0.0000 C   0  0  0  0  0  0  0  0  0  0  0  0
   -4.6750    5.6964    0.0000 C   0  0  0  0  0  0  0  0  0  0  0  0
   -5.3895    6.9339    0.0000 C   0  0  0  0  0  0  0  0  0  0  0  0
   -4.6751    7.3465    0.0000 N   0  0  0  0  0  0  0  0  0  0  0  0
   -3.9606    6.9340    0.0000 C   0  0  0  0  0  0  0  0  0  0  0  0
   -3.2461    7.3465    0.0000 C   0  0  0  0  0  0  0  0  0  0  0  0
   -3.9606    6.1089    0.0000 C   0  0  0  0  0  0  0  0  0  0  0  0
   -3.2461    5.6964    0.0000 C   0  0  0  0  0  0  0  0  0  0  0  0
   -2.5317    6.1089    0.0000 C   0  0  0  0  0  0  0  0  0  0  0  0
   -2.5317    6.9340    0.0000 C   0  0  0  0  0  0  0  0  0  0  0  0
   -3.2461    8.1715    0.0000 C   0  0  0  0  0  0  0  0  0  0  0  0
   -2.5317    8.5840    0.0000 C   0  0  0  0  0  0  0  0  0  0  0  0
   -1.8172    8.1715    0.0000 C   0  0  0  0  0  0  0  0  0  0  0  0
   -1.8172    7.3465    0.0000 C   0  0  0  0  0  0  0  0  0  0  0  0
   -3.1636    3.4204    0.0000 C   0  0  0  0  0  0  0  0  0  0  0  0
   -2.3668    3.2069    0.0000 C   0  0  0  0  0  0  0  0  0  0  0  0
   -1.5699    2.9933    0.0000 C   0  0  3  0  0  0  0  0  0  0  0  0
   -0.9865    3.5767    0.0000 N   0  0  0  0  0  0  0  0  0  0  0  0
   -1.8172    5.6965    0.0000 O   0  0  0  0  0  0  0  0  0  0  0  0
   -1.3563    2.1965    0.0000 C   0  0  0  0  0  0  0  0  0  0  0  0
   -0.1896    3.3632    0.0000 C   0  0  3  0  0  0  0  0  0  0  0  0
   -1.4161    4.3540    0.0000 C   0  0  0  0  0  0  0  0  0  0  0  0
    0.3937    3.9465    0.0000 C   0  0  3  0  0  0  0  0  0  0  0  0
    0.0239    2.5663    0.0000 C   0  0  0  0  0  0  0  0  0  0  0  0
    1.1906    3.7330    0.0000 C   0  0  0  0  0  0  0  0  0  0  0  0
    0.1802    4.7434    0.0000 N   0  0  0  0  0  0  0  0  0  0  0  0
    1.7740    4.3164    0.0000 C   0  0  0  0  0  0  0  0  0  0  0  0
    2.5709    4.1029    0.0000 C   0  0  0  0  0  0  0  0  0  0  0  0
    3.1543    4.6862    0.0000 C   0  0  0  0  0  0  0  0  0  0  0  0
    2.9408    5.4831    0.0000 C   0  0  0  0  0  0  0  0  0  0  0  0
    2.1439    5.6966    0.0000 C   0  0  0  0  0  0  0  0  0  0  0  0
    1.5605    5.1133    0.0000 C   0  0  0  0  0  0  0  0  0  0  0  0
   -0.6167    4.9570    0.0000 C   0  0  0  0  0  0  0  0  0  0  0  0
   -0.9088    5.7146    0.0000 C   0  0  3  0  0  0  0  0  0  0  0  0
   -1.1189    4.4684    0.0000 O   0  0  0  0  0  0  0  0  0  0  0  0
   -2.5317    9.4090    0.0000 F   0  0  0  0  0  0  0  0  0  0  0  0
   -1.1027    8.5840    0.0000 F   0  0  0  0  0  0  0  0  0  0  0  0
   -6.8185    6.1089    0.0000 F   0  0  0  0  0  0  0  0  0  0  0  0
   -4.6750    2.3964    0.0000 F   0  0  0  0  0  0  0  0  0  0  0  0
   -0.4488    6.3994    0.0000 C   0  0  0  0  0  0  0  0  0  0  0  0
   -0.8119    7.1402    0.0000 C   0  0  0  0  0  0  0  0  0  0  0  0
    0.3743    6.3435    0.0000 C   0  0  0  0  0  0  0  0  0  0  0  0
  1  2  1  0  0  0  0
  1  6  2  0  0  0  0
  1 10  1  0  0  0  0
  2  3  2  0  0  0  0
  2  7  1  0  0  0  0
  3  4  1  0  0  0  0
  4  5  2  0  0  0  0
  4 47  1  0  0  0  0
  5  6  1  0  0  0  0
  5 23  1  0  0  0  0
  7  8  2  0  0  0  0
  8  9  1  0  0  0  0
  8 46  1  0  0  0  0
  9 10  2  0  0  0  0
  9 11  1  0  0  0  0
 11 12  1  0  0  0  0
 12 13  1  0  0  0  0
 13 15  1  0  0  0  0
 14 18  1  0  0  0  0
 14 13  2  0  0  0  0
 14 19  1  0  0  0  0
 15 16  2  0  0  0  0
 16 17  1  0  0  0  0
 17 18  2  0  0  0  0
 17 27  1  0  0  0  0
 18 22  1  0  0  0  0
 19 20  2  0  0  0  0
 20 21  1  0  0  0  0
 20 44  1  0  0  0  0
 21 22  2  0  0  0  0
 21 45  1  0  0  0  0
 23 24  3  0  0  0  0
 24 25  1  0  0  0  0
 25 26  1  0  0  0  0
 25 28  1  0  0  0  0
 26 29  1  0  0  0  0
 26 30  1  0  0  0  0
 27 42  1  0  0  0  0
 29 31  1  0  0  0  0
 29 32  1  0  0  0  0
 31 33  1  0  0  0  0
 31 34  1  0  0  0  0
 33 35  1  0  0  0  0
 34 41  1  0  0  0  0
 35 36  2  0  0  0  0
 35 40  1  0  0  0  0
 36 37  1  0  0  0  0
 37 38  2  0  0  0  0
 38 39  1  0  0  0  0
 39 40  2  0  0  0  0
 41 42  1  0  0  0  0
 41 43  2  0  0  0  0
 42 48  1  0  0  0  0
 48 49  1  0  0  0  0
 48 50  1  0  0  0  0
M  END
22
 

 65 72  0  0  0  0  0  0  0  0999 V2000
   -2.4043    1.1904    0.0000 C   0  0  0  0  0  0  0  0  0  0  0  0
   -3.1187    1.6029    0.0000 C   0  0  0  0  0  0  0  0  0  0  0  0
   -3.8333    1.1904    0.0000 C   0  0  0  0  0  0  0  0  0  0  0  0
   -3.8333    0.3654    0.0000 C   0  0  0  0  0  0  0  0  0  0  0  0
   -3.1187   -0.0471    0.0000 C   0  0  0  0  0  0  0  0  0  0  0  0
   -2.4043    0.3654    0.0000 C   0  0  0  0  0  0  0  0  0  0  0  0
   -1.6898   -0.0471    0.0000 C   0  0  0  0  0  0  0  0  0  0  0  0
   -0.9753    0.3654    0.0000 C   0  0  0  0  0  0  0  0  0  0  0  0
   -0.9753    1.1904    0.0000 C   0  0  0  0  0  0  0  0  0  0  0  0
   -1.6898    1.6029    0.0000 C   0  0  0  0  0  0  0  0  0  0  0  0
   -0.2609   -0.0471    0.0000 C   0  0  0  0  0  0  0  0  0  0  0  0
    0.4536    0.3654    0.0000 C   0  0  0  0  0  0  0  0  0  0  0  0
    0.4536    1.1904    0.0000 C   0  0  0  0  0  0  0  0  0  0  0  0
   -0.2609    1.6029    0.0000 C   0  0  0  0  0  0  0  0  0  0  0  0
   -1.6899    2.4279    0.0000 C   0  0  0  0  0  0  0  0  0  0  0  0
   -2.4043    2.8403    0.0000 C   0  0  0  0  0  0  0  0  0  0  0  0
   -2.4044    3.6653    0.0000 C   0  0  0  0  0  0  0  0  0  0  0  0
   -3.1189    4.0778    0.0000 C   0  0  0  0  0  0  0  0  0  0  0  0
   -3.8333    3.6653    0.0000 C   0  0  0  0  0  0  0  0  0  0  0  0
   -3.8333    2.8403    0.0000 C   0  0  0  0  0  0  0  0  0  0  0  0
   -3.1188    2.4278    0.0000 C   0  0  0  0  0  0  0  0  0  0  0  0
   -0.2610    2.4279    0.0000 C   0  0  0  0  0  0  0  0  0  0  0  0
   -0.9754    2.8404    0.0000 N   0  0  0  0  0  0  0  0  0  0  0  0
   -0.9754    3.6654    0.0000 C   0  0  3  0  0  0  0  0  0  0  0  0
    0.4535    2.8404    0.0000 O   0  0  0  0  0  0  0  0  0  0  0  0
   -1.6899    4.0779    0.0000 C   0  0  0  0  0  0  0  0  0  0  0  0
   -1.6899    4.9029    0.0000 C   0  0  0  0  0  0  0  0  0  0  0  0
   -2.4044    5.3154    0.0000 C   0  0  3  0  0  0  0  0  0  0  0  0
   -3.1189    4.9029    0.0000 N   0  0  0  0  0  0  0  0  0  0  0  0
   -3.8333    5.3154    0.0000 C   0  0  0  0  0  0  0  0  0  0  0  0
   -4.5478    4.9029    0.0000 C   0  0  3  0  0  0  0  0  0  0  0  0
   -4.5478    4.0779    0.0000 N   0  0  0  0  0  0  0  0  0  0  0  0
   -4.5477    1.6029    0.0000 C   0  0  0  0  0  0  0  0  0  0  0  0
   -4.5477    2.4279    0.0000 N   0  0  0  0  0  0  0  0  0  0  0  0
   -5.2622    2.8404    0.0000 C   0  0  3  0  0  0  0  0  0  0  0  0
   -5.2622    3.6654    0.0000 C   0  0  0  0  0  0  0  0  0  0  0  0
   -0.2610    4.0779    0.0000 C   0  0  0  0  0  0  0  0  0  0  0  0
   -0.2610    4.9029    0.0000 C   0  0  0  0  0  0  0  0  0  0  0  0
    0.4535    5.3154    0.0000 C   0  0  0  0  0  0  0  0  0  0  0  0
    0.4535    6.1404    0.0000 C   0  0  0  0  0  0  0  0  0  0  0  0
    1.1680    6.5529    0.0000 C   0  0  0  0  0  0  0  0  0  0  0  0
   -0.9754    5.3154    0.0000 O   0  0  0  0  0  0  0  0  0  0  0  0
   -2.4044    6.1404    0.0000 C   0  0  0  0  0  0  0  0  0  0  0  0
   -3.1189    6.5529    0.0000 C   0  0  0  0  0  0  0  0  0  0  0  0
   -1.6899    6.5529    0.0000 C   0  0  0  0  0  0  0  0  0  0  0  0
   -3.8333    6.1404    0.0000 O   0  0  0  0  0  0  0  0  0  0  0  0
   -5.2622    1.1904    0.0000 O   0  0  0  0  0  0  0  0  0  0  0  0
   -5.9767    2.4279    0.0000 C   0  0  0  0  0  0  0  0  0  0  0  0
   -6.6911    2.8404    0.0000 C   0  0  0  0  0  0  0  0  0  0  0  0
   -5.9766    4.0779    0.0000 O   0  0  0  0  0  0  0  0  0  0  0  0
   -5.2623    5.3154    0.0000 C   0  0  0  0  0  0  0  0  0  0  0  0
   -5.2623    6.1404    0.0000 C   0  0  0  0  0  0  0  0  0  0  0  0
   -4.5948    6.6253    0.0000 C   0  0  0  0  0  0  0  0  0  0  0  0
   -4.8498    7.4099    0.0000 N   0  0  0  0  0  0  0  0  0  0  0  0
   -5.6748    7.4099    0.0000 C   0  0  0  0  0  0  0  0  0  0  0  0
   -5.9297    6.6253    0.0000 C   0  0  0  0  0  0  0  0  0  0  0  0
   -6.7367    6.4537    0.0000 C   0  0  0  0  0  0  0  0  0  0  0  0
   -7.2888    7.0668    0.0000 C   0  0  0  0  0  0  0  0  0  0  0  0
   -7.0338    7.8514    0.0000 C   0  0  0  0  0  0  0  0  0  0  0  0
   -6.2268    8.0230    0.0000 C   0  0  0  0  0  0  0  0  0  0  0  0
   -7.4056    4.0779    0.0000 C   0  0  0  0  0  0  0  0  0  0  0  0
   -8.1201    3.6654    0.0000 C   0  0  0  0  0  0  0  0  0  0  0  0
   -8.1201    2.8404    0.0000 C   0  0  0  0  0  0  0  0  0  0  0  0
   -7.4056    2.4279    0.0000 C   0  0  0  0  0  0  0  0  0  0  0  0
   -6.6911    3.6654    0.0000 C   0  0  0  0  0  0  0  0  0  0  0  0
  1  2  2  0  0  0  0
  1  6  1  0  0  0  0
  1 10  1  0  0  0  0
  2  3  1  0  0  0  0
  3  4  2  0  0  0  0
  3 33  1  0  0  0  0
  4  5  1  0  0  0  0
  5  6  2  0  0  0  0
  6  7  1  0  0  0  0
  7  8  2  0  0  0  0
  8  9  1  0  0  0  0
  8 11  1  0  0  0  0
  9 10  2  0  0  0  0
  9 14  1  0  0  0  0
 10 15  1  0  0  0  0
 11 12  2  0  0  0  0
 12 13  1  0  0  0  0
 13 14  2  0  0  0  0
 14 22  1  0  0  0  0
 15 16  1  0  0  0  0
 16 17  2  0  0  0  0
 16 21  1  0  0  0  0
 17 18  1  0  0  0  0
 18 19  2  0  0  0  0
 19 20  1  0  0  0  0
 20 21  2  0  0  0  0
 22 23  1  0  0  0  0
 22 25  2  0  0  0  0
 23 24  1  0  0  0  0
 24 26  1  0  0  0  0
 24 37  1  0  0  0  0
 26 27  1  0  0  0  0
 27 28  1  0  0  0  0
 27 42  2  0  0  0  0
 28 29  1  0  0  0  0
 28 43  1  0  0  0  0
 29 30  1  0  0  0  0
 30 31  1  0  0  0  0
 30 46  2  0  0  0  0
 31 32  1  0  0  0  0
 31 51  1  0  0  0  0
 33 34  1  0  0  0  0
 33 47  2  0  0  0  0
 34 35  1  0  0  0  0
 35 36  1  0  0  0  0
 35 48  1  0  0  0  0
 36 32  1  0  0  0  0
 36 50  2  0  0  0  0
 37 38  1  0  0  0  0
 38 39  1  0  0  0  0
 39 40  2  0  0  0  0
 40 41  1  0  0  0  0
 43 44  1  0  0  0  0
 43 45  1  0  0  0  0
 48 49  1  0  0  0  0
 49 65  1  0  0  0  0
 51 52  1  0  0  0  0
 52 53  2  0  0  0  0
 52 56  1  0  0  0  0
 53 54  1  0  0  0  0
 54 55  1  0  0  0  0
 55 60  2  0  0  0  0
 55 56  1  0  0  0  0
 56 57  2  0  0  0  0
 57 58  1  0  0  0  0
 58 59  2  0  0  0  0
 59 60  1  0  0  0  0
 61 62  1  0  0  0  0
 61 65  2  0  0  0  0
 62 63  2  0  0  0  0
 63 64  1  0  0  0  0
 64 49  2  0  0  0  0
M  END
23
 

 48 51  0  0  0  0  0  0  0  0999 V2000
   -0.5893   -5.2250    0.0000 C   0  0  0  0  0  0  0  0  0  0  0  0
   -1.3038   -5.6375    0.0000 C   0  0  0  0  0  0  0  0  0  0  0  0
   -1.3038   -6.4625    0.0000 C   0  0  0  0  0  0  0  0  0  0  0  0
   -0.5893   -6.8750    0.0000 C   0  0  0  0  0  0  0  0  0  0  0  0
    0.1252   -6.4625    0.0000 C   0  0  0  0  0  0  0  0  0  0  0  0
    0.1252   -5.6375    0.0000 C   0  0  0  0  0  0  0  0  0  0  0  0
    0.8397   -5.2250    0.0000 N   0  0  0  0  0  0  0  0  0  0  0  0
    0.8397   -4.4000    0.0000 C   0  0  0  0  0  0  0  0  0  0  0  0
    1.5541   -5.6375    0.0000 C   0  0  0  0  0  0  0  0  0  0  0  0
    1.5541   -3.9875    0.0000 C   0  0  0  0  0  0  0  0  0  0  0  0
    0.1252   -3.9875    0.0000 O   0  0  0  0  0  0  0  0  0  0  0  0
    1.5541   -3.1625    0.0000 C   0  0  3  0  0  0  0  0  0  0  0  0
    2.2686   -2.7500    0.0000 O   0  0  0  0  0  0  0  0  0  0  0  0
    0.8397   -2.7500    0.0000 C   0  0  3  0  0  0  0  0  0  0  0  0
    0.8397   -1.9250    0.0000 C   0  0  0  0  0  0  0  0  0  0  0  0
    0.1252   -3.1625    0.0000 C   0  0  3  0  0  0  0  0  0  0  0  0
    0.1252   -2.3375    0.0000 O   0  0  0  0  0  0  0  0  0  0  0  0
   -0.5893   -3.5750    0.0000 C   0  0  3  0  0  0  0  0  0  0  0  0
   -0.5893   -4.4000    0.0000 C   0  0  0  0  0  0  0  0  0  0  0  0
   -1.3037   -3.1625    0.0000 C   0  0  3  0  0  0  0  0  0  0  0  0
   -2.0182   -1.9250    0.0000 C   0  0  0  0  0  0  0  0  0  0  0  0
   -2.7327   -2.3375    0.0000 N   0  0  0  0  0  0  0  0  0  0  0  0
   -2.7327   -3.1625    0.0000 C   0  0  3  0  0  0  0  0  0  0  0  0
   -2.0182   -3.5750    0.0000 C   0  0  0  0  0  0  0  0  0  0  0  0
   -1.3037   -2.3375    0.0000 O   0  0  0  0  0  0  0  0  0  0  0  0
   -2.0182   -5.2250    0.0000 C   0  0  0  0  0  0  0  0  0  0  0  0
   -2.8151   -5.4385    0.0000 C   0  0  0  0  0  0  0  0  0  0  0  0
   -3.6120   -5.2250    0.0000 C   0  0  0  0  0  0  0  0  0  0  0  0
   -3.5085   -3.1636    0.0000 C   0  0  3  0  0  0  0  0  0  0  0  0
   -4.0526   -3.7273    0.0000 C   0  0  0  0  0  0  0  0  0  0  0  0
   -4.0852   -4.5491    0.0000 C   0  0  0  0  0  0  0  0  0  0  0  0
   -2.8151   -6.2635    0.0000 C   0  0  0  0  0  0  0  0  0  0  0  0
   -3.8315   -2.4045    0.0000 O   0  0  0  0  0  0  0  0  0  0  0  0
   -3.1452   -3.8770    0.0000 O   0  0  0  0  0  0  0  0  0  0  0  0
   -4.6504   -2.3047    0.0000 C   0  0  0  0  0  0  0  0  0  0  0  0
   -2.0182   -1.1000    0.0000 O   0  0  0  0  0  0  0  0  0  0  0  0
    2.9831   -3.1625    0.0000 C   0  0  0  0  0  0  0  0  0  0  0  0
    3.6976   -2.7500    0.0000 C   0  0  3  0  0  0  0  0  0  0  0  0
    4.4120   -3.1625    0.0000 N   0  0  0  0  0  0  0  0  0  0  0  0
    5.1265   -2.7500    0.0000 C   0  0  0  0  0  0  0  0  0  0  0  0
    5.8410   -3.1625    0.0000 C   0  0  0  0  0  0  0  0  0  0  0  0
   -0.5893   -7.7000    0.0000 O   0  0  0  0  0  0  0  0  0  0  0  0
    0.1252   -8.1125    0.0000 C   0  0  0  0  0  0  0  0  0  0  0  0
    2.9831   -3.9875    0.0000 O   0  0  0  0  0  0  0  0  0  0  0  0
    3.6976   -1.9250    0.0000 C   0  0  0  0  0  0  0  0  0  0  0  0
    4.4120   -3.9875    0.0000 C   0  0  0  0  0  0  0  0  0  0  0  0
    5.1265   -1.9250    0.0000 O   0  0  0  0  0  0  0  0  0  0  0  0
    0.8397   -6.8750    0.0000 Cl  0  0  0  0  0  0  0  0  0  0  0  0
  1  2  2  0  0  0  0
  1  6  1  0  0  0  0
  2  3  1  0  0  0  0
  2 26  1  0  0  0  0
  3  4  2  0  0  0  0
  4  5  1  0  0  0  0
  4 42  1  0  0  0  0
  5  6  2  0  0  0  0
  5 48  1  0  0  0  0
  6  7  1  0  0  0  0
  7  8  1  0  0  0  0
  7  9  1  0  0  0  0
  8 10  1  0  0  0  0
  8 11  2  0  0  0  0
 10 12  1  0  0  0  0
 12 13  1  0  0  0  0
 12 14  1  0  0  0  0
 13 37  1  0  0  0  0
 14 15  1  0  0  0  0
 14 16  1  0  0  0  0
 14 17  1  0  0  0  0
 16 18  1  0  0  0  0
 17 16  1  0  0  0  0
 18 19  1  0  0  0  0
 18 20  1  0  0  0  0
 20 25  1  0  0  0  0
 21 22  1  0  0  0  0
 21 25  1  0  0  0  0
 21 36  2  0  0  0  0
 22 23  1  0  0  0  0
 23 24  1  0  0  0  0
 23 29  1  0  0  0  0
 23 34  1  0  0  0  0
 24 20  1  0  0  0  0
 26 27  1  0  0  0  0
 27 28  2  0  0  0  0
 27 32  1  0  0  0  0
 29 30  1  0  0  0  0
 29 33  1  0  0  0  0
 30 31  2  0  0  0  0
 31 28  1  0  0  0  0
 33 35  1  0  0  0  0
 37 38  1  0  0  0  0
 37 44  2  0  0  0  0
 38 39  1  0  0  0  0
 38 45  1  0  0  0  0
 39 40  1  0  0  0  0
 39 46  1  0  0  0  0
 40 41  1  0  0  0  0
 40 47  2  0  0  0  0
 42 43  1  0  0  0  0
M  END
24
 

 56 58  0  0  0  0  0  0  0  0999 V2000
   -0.6616    0.9519    0.0000 C   0  0  0  0  0  0  0  0  0  0  0  0
   -0.0200    0.4813    0.0000 N   0  0  0  0  0  0  0  0  0  0  0  0
    0.6288    0.9426    0.0000 C   0  0  0  0  0  0  0  0  0  0  0  0
    0.3830    1.7249    0.0000 C   0  0  0  0  0  0  0  0  0  0  0  0
   -0.4011    1.7239    0.0000 O   0  0  0  0  0  0  0  0  0  0  0  0
    1.3396    0.7914    0.0000 C   0  0  0  0  0  0  0  0  0  0  0  0
    1.6485    0.0768    0.0000 O   0  0  0  0  0  0  0  0  0  0  0  0
    1.8433    1.4022    0.0000 O   0  0  0  0  0  0  0  0  0  0  0  0
    2.5752    1.3725    0.0000 C   0  0  3  0  0  0  0  0  0  0  0  0
    3.0309    0.7419    0.0000 C   0  0  0  0  0  0  0  0  0  0  0  0
    3.7919    0.8941    0.0000 C   0  0  0  0  0  0  0  0  0  0  0  0
    4.3626    0.4212    0.0000 C   0  0  0  0  0  0  0  0  0  0  0  0
    4.3798   -0.3315    0.0000 C   0  0  0  0  0  0  0  0  0  0  0  0
    3.8264   -0.8239    0.0000 C   0  0  0  0  0  0  0  0  0  0  0  0
    3.0624   -0.6967    0.0000 C   0  0  0  0  0  0  0  0  0  0  0  0
    2.6250   -1.3341    0.0000 C   0  0  0  0  0  0  0  0  0  0  0  0
    1.8877   -1.4017    0.0000 C   0  0  3  0  0  0  0  0  0  0  0  0
    1.3735   -0.8076    0.0000 C   0  0  0  0  0  0  0  0  0  0  0  0
    0.6595   -0.9672    0.0000 C   0  0  0  0  0  0  0  0  0  0  0  0
    0.4077   -1.7393    0.0000 O   0  0  0  0  0  0  0  0  0  0  0  0
   -0.3903   -1.7325    0.0000 C   0  0  0  0  0  0  0  0  0  0  0  0
   -0.6219   -0.9427    0.0000 C   0  0  0  0  0  0  0  0  0  0  0  0
   -1.3423   -0.7907    0.0000 C   0  0  0  0  0  0  0  0  0  0  0  0
   -1.6449   -0.0810    0.0000 O   0  0  0  0  0  0  0  0  0  0  0  0
   -1.8358   -1.4059    0.0000 O   0  0  0  0  0  0  0  0  0  0  0  0
   -2.5715   -1.3795    0.0000 C   0  0  3  0  0  0  0  0  0  0  0  0
   -3.0351   -0.7497    0.0000 C   0  0  0  0  0  0  0  0  0  0  0  0
   -3.7914   -0.9071    0.0000 C   0  0  0  0  0  0  0  0  0  0  0  0
   -4.3625   -0.4254    0.0000 C   0  0  0  0  0  0  0  0  0  0  0  0
   -4.3725    0.3274    0.0000 C   0  0  0  0  0  0  0  0  0  0  0  0
   -3.8241    0.8230    0.0000 C   0  0  0  0  0  0  0  0  0  0  0  0
   -3.0619    0.6884    0.0000 C   0  0  0  0  0  0  0  0  0  0  0  0
   -2.6259    1.3379    0.0000 C   0  0  0  0  0  0  0  0  0  0  0  0
   -1.8892    1.3863    0.0000 C   0  0  3  0  0  0  0  0  0  0  0  0
   -1.3714    0.7979    0.0000 C   0  0  0  0  0  0  0  0  0  0  0  0
   -1.5703    2.1214    0.0000 O   0  0  0  0  0  0  0  0  0  0  0  0
   -2.9841   -2.0704    0.0000 C   0  0  0  0  0  0  0  0  0  0  0  0
    0.0216   -0.4966    0.0000 N   0  0  0  0  0  0  0  0  0  0  0  0
    1.5653   -2.1234    0.0000 O   0  0  0  0  0  0  0  0  0  0  0  0
    2.9870    2.0652    0.0000 C   0  0  0  0  0  0  0  0  0  0  0  0
    2.0485   -2.7201    0.0000 C   0  0  0  0  0  0  0  0  0  0  0  0
   -2.1536    2.7049    0.0000 C   0  0  0  0  0  0  0  0  0  0  0  0
    3.8119    2.0548    0.0000 C   0  0  3  0  0  0  0  0  0  0  0  0
    4.2334    2.7641    0.0000 C   0  0  0  0  0  0  0  0  0  0  0  0
    2.3033    2.5603    0.0000 C   0  0  0  0  0  0  0  0  0  0  0  0
    3.1284    2.8667    0.0000 C   0  0  0  0  0  0  0  0  0  0  0  0
    5.0584    2.7538    0.0000 C   0  0  0  0  0  0  0  0  0  0  0  0
    5.4799    3.4630    0.0000 C   0  0  0  0  0  0  0  0  0  0  0  0
    4.2244    1.3403    0.0000 O   0  0  0  0  0  0  0  0  0  0  0  0
   -3.8091   -2.0583    0.0000 C   0  0  3  0  0  0  0  0  0  0  0  0
   -4.2320   -2.7668    0.0000 C   0  0  0  0  0  0  0  0  0  0  0  0
   -4.2110   -1.3379    0.0000 O   0  0  0  0  0  0  0  0  0  0  0  0
   -5.0570   -2.7547    0.0000 C   0  0  0  0  0  0  0  0  0  0  0  0
   -5.4799   -3.4630    0.0000 C   0  0  0  0  0  0  0  0  0  0  0  0
   -3.1977   -2.8674    0.0000 C   0  0  0  0  0  0  0  0  0  0  0  0
   -2.4007   -2.6539    0.0000 C   0  0  0  0  0  0  0  0  0  0  0  0
  1  5  1  0  0  0  0
  1 35  1  0  0  0  0
  1  2  2  0  0  0  0
  3  2  1  0  0  0  0
  3  4  2  0  0  0  0
  5  4  1  0  0  0  0
  6  3  1  0  0  0  0
  7  6  2  0  0  0  0
  8  6  1  0  0  0  0
  9  8  1  0  0  0  0
 10  9  1  0  0  0  0
 11 10  1  0  0  0  0
 12 11  2  0  0  0  0
 13 12  1  0  0  0  0
 14 13  2  0  0  0  0
 15 14  1  0  0  0  0
 16 15  2  0  0  0  0
 17 16  1  0  0  0  0
 18 17  1  0  0  0  0
 19 18  1  0  0  0  0
 19 38  2  0  0  0  0
 20 19  1  0  0  0  0
 21 20  1  0  0  0  0
 22 21  2  0  0  0  0
 23 22  1  0  0  0  0
 24 23  2  0  0  0  0
 25 23  1  0  0  0  0
 26 25  1  0  0  0  0
 27 26  1  0  0  0  0
 28 27  1  0  0  0  0
 29 28  2  0  0  0  0
 30 29  1  0  0  0  0
 31 30  2  0  0  0  0
 32 31  1  0  0  0  0
 33 32  2  0  0  0  0
 34 33  1  0  0  0  0
 35 34  1  0  0  0  0
 36 34  1  0  0  0  0
 36 42  1  0  0  0  0
 37 26  1  0  0  0  0
 37 50  1  0  0  0  0
 37 55  1  0  0  0  0
 37 56  1  0  0  0  0
 38 22  1  0  0  0  0
 39 17  1  0  0  0  0
 39 41  1  0  0  0  0
 40  9  1  0  0  0  0
 40 43  1  0  0  0  0
 40 45  1  0  0  0  0
 40 46  1  0  0  0  0
 43 44  1  0  0  0  0
 43 49  1  0  0  0  0
 44 47  2  0  0  0  0
 47 48  1  0  0  0  0
 50 51  1  0  0  0  0
 50 52  1  0  0  0  0
 51 53  2  0  0  0  0
 53 54  1  0  0  0  0
M  END
25
 

 85 91  0  0  0  0  0  0  0  0999 V2000
    1.2267   -1.1903    0.0000 C   0  0  3  0  0  0  0  0  0  0  0  0
    1.9412   -0.7778    0.0000 C   0  0  3  0  0  0  0  0  0  0  0  0
    1.9412    0.0472    0.0000 C   0  0  3  0  0  0  0  0  0  0  0  0
    1.2267    0.4597    0.0000 C   0  0  3  0  0  0  0  0  0  0  0  0
    0.5122    0.0472    0.0000 C   0  0  3  0  0  0  0  0  0  0  0  0
    0.5122   -0.7778    0.0000 O   0  0  0  0  0  0  0  0  0  0  0  0
    1.2267   -2.0153    0.0000 C   0  0  3  0  0  0  0  0  0  0  0  0
    0.5122   -2.4278    0.0000 C   0  0  3  0  0  0  0  0  0  0  0  0
   -0.2022   -2.0153    0.0000 C   0  0  0  0  0  0  0  0  0  0  0  0
   -0.9167   -2.4279    0.0000 C   0  0  3  0  0  0  0  0  0  0  0  0
   -0.9167   -3.2529    0.0000 C   0  0  3  0  0  0  0  0  0  0  0  0
   -0.2023   -3.6653    0.0000 C   0  0  3  0  0  0  0  0  0  0  0  0
    0.5122   -3.2528    0.0000 O   0  0  0  0  0  0  0  0  0  0  0  0
   -0.2023   -4.4903    0.0000 C   0  0  0  0  0  0  0  0  0  0  0  0
    0.5122   -4.9028    0.0000 C   0  0  0  0  0  0  0  0  0  0  0  0
    1.2267   -4.4903    0.0000 C   0  0  0  0  0  0  0  0  0  0  0  0
    1.2267   -3.6653    0.0000 C   0  0  0  0  0  0  0  0  0  0  0  0
    1.9412   -3.2528    0.0000 C   0  0  0  0  0  0  0  0  0  0  0  0
    2.6556   -3.6653    0.0000 C   0  0  3  0  0  0  0  0  0  0  0  0
    2.6556   -4.4903    0.0000 C   0  0  0  0  0  0  0  0  0  0  0  0
    3.3701   -4.9028    0.0000 C   0  0  3  0  0  0  0  0  0  0  0  0
    4.0846   -4.4904    0.0000 C   0  0  0  0  0  0  0  0  0  0  0  0
    4.0846   -3.6654    0.0000 C   0  0  3  0  0  0  0  0  0  0  0  0
    3.3701   -3.2528    0.0000 O   0  0  0  0  0  0  0  0  0  0  0  0
    4.7991   -2.4278    0.0000 C   0  0  3  0  0  0  0  0  0  0  0  0
    4.0846   -2.8403    0.0000 O   0  0  0  0  0  0  0  0  0  0  0  0
    4.7991   -4.0779    0.0000 C   0  0  0  0  0  0  0  0  0  0  0  0
    5.5135   -3.6654    0.0000 C   0  0  3  0  0  0  0  0  0  0  0  0
    5.5135   -2.8403    0.0000 C   0  0  0  0  0  0  0  0  0  0  0  0
    4.7991   -1.6028    0.0000 C   0  0  0  0  0  0  0  0  0  0  0  0
    1.9412   -2.4278    0.0000 O   0  0  0  0  0  0  0  0  0  0  0  0
    1.2267   -2.8403    0.0000 O   0  0  0  0  0  0  0  0  0  0  0  0
    2.6556    0.4597    0.0000 O   0  0  0  0  0  0  0  0  0  0  0  0
    3.3701    0.0472    0.0000 C   0  0  0  0  0  0  0  0  0  0  0  0
    4.0748    0.4767    0.0000 C   0  0  0  0  0  0  0  0  0  0  0  0
    3.3701   -0.7778    0.0000 O   0  0  0  0  0  0  0  0  0  0  0  0
    4.0748    1.3017    0.0000 C   0  0  3  0  0  0  0  0  0  0  0  0
    4.7892    1.7142    0.0000 O   0  0  0  0  0  0  0  0  0  0  0  0
    4.7892    2.5392    0.0000 C   0  0  3  0  0  0  0  0  0  0  0  0
    4.0748    2.9517    0.0000 C   0  0  0  0  0  0  0  0  0  0  0  0
    3.3603    2.5392    0.0000 C   0  0  3  0  0  0  0  0  0  0  0  0
    3.3603    1.7142    0.0000 C   0  0  0  0  0  0  0  0  0  0  0  0
    6.2182    3.3642    0.0000 C   0  0  0  0  0  0  0  0  0  0  0  0
    5.5037    3.7767    0.0000 C   0  0  3  0  0  0  0  0  0  0  0  0
    4.7893    3.3642    0.0000 C   0  0  0  0  0  0  0  0  0  0  0  0
    5.5037    2.1267    0.0000 O   0  0  0  0  0  0  0  0  0  0  0  0
    6.2182    2.5392    0.0000 C   0  0  3  0  0  0  0  0  0  0  0  0
    6.9327    2.1267    0.0000 C   0  0  0  0  0  0  0  0  0  0  0  0
    5.5135   -1.1903    0.0000 C   0  0  0  0  0  0  0  0  0  0  0  0
    5.5135   -0.3653    0.0000 C   0  0  3  0  0  0  0  0  0  0  0  0
    6.2280    0.0472    0.0000 C   0  0  3  0  0  0  0  0  0  0  0  0
    6.2280    0.8722    0.0000 C   0  0  3  0  0  0  0  0  0  0  0  0
    6.9425    1.2847    0.0000 C   0  0  0  0  0  0  0  0  0  0  0  0
    3.3701   -5.7278    0.0000 O   0  0  0  0  0  0  0  0  0  0  0  0
    6.2280   -4.0778    0.0000 O   0  0  0  0  0  0  0  0  0  0  0  0
    6.9425   -3.6653    0.0000 C   0  0  0  0  0  0  0  0  0  0  0  0
    6.2280   -1.6028    0.0000 O   0  0  0  0  0  0  0  0  0  0  0  0
    4.7991    0.0472    0.0000 C   0  0  0  0  0  0  0  0  0  0  0  0
    6.9425   -0.3653    0.0000 O   0  0  0  0  0  0  0  0  0  0  0  0
    5.5135    1.2847    0.0000 C   0  0  0  0  0  0  0  0  0  0  0  0
    7.6593    0.8763    0.0000 C   0  0  0  0  0  0  0  0  0  0  0  0
    5.0912    4.4912    0.0000 C   0  0  0  0  0  0  0  0  0  0  0  0
    5.9162    4.4912    0.0000 O   0  0  0  0  0  0  0  0  0  0  0  0
    2.6458    2.9517    0.0000 O   0  0  0  0  0  0  0  0  0  0  0  0
    1.9314    2.5392    0.0000 C   0  0  0  0  0  0  0  0  0  0  0  0
    1.2169    2.9517    0.0000 C   0  0  0  0  0  0  0  0  0  0  0  0
    1.9314    1.7142    0.0000 O   0  0  0  0  0  0  0  0  0  0  0  0
    1.2267    1.2847    0.0000 O   0  0  0  0  0  0  0  0  0  0  0  0
   -0.2022    0.4597    0.0000 C   0  0  0  0  0  0  0  0  0  0  0  0
   -0.9167    0.0472    0.0000 C   0  0  0  0  0  0  0  0  0  0  0  0
   -1.6312    0.4597    0.0000 C   0  0  0  0  0  0  0  0  0  0  0  0
   -2.3456    0.0472    0.0000 C   0  0  3  0  0  0  0  0  0  0  0  0
   -3.0601    0.4597    0.0000 C   0  0  0  0  0  0  0  0  0  0  0  0
   -3.7746    0.0472    0.0000 C   0  0  0  0  0  0  0  0  0  0  0  0
   -4.4891    0.4597    0.0000 C   0  0  0  0  0  0  0  0  0  0  0  0
   -0.9167   -0.7778    0.0000 C   0  0  0  0  0  0  0  0  0  0  0  0
   -2.3456   -0.7778    0.0000 O   0  0  0  0  0  0  0  0  0  0  0  0
   -5.2035    0.0472    0.0000 C   0  0  0  0  0  0  0  0  0  0  0  0
   -4.4891    1.2847    0.0000 Cl  0  0  0  0  0  0  0  0  0  0  0  0
    2.6556   -1.1903    0.0000 C   0  0  0  0  0  0  0  0  0  0  0  0
   -1.6312   -2.0154    0.0000 O   0  0  0  0  0  0  0  0  0  0  0  0
   -1.6312   -3.6654    0.0000 C   0  0  0  0  0  0  0  0  0  0  0  0
    7.7675   -0.3653    0.0000 C   0  0  0  0  0  0  0  0  0  0  0  0
    8.1800   -1.0798    0.0000 C   0  0  0  0  0  0  0  0  0  0  0  0
    8.1800    0.3491    0.0000 O   0  0  0  0  0  0  0  0  0  0  0  0
  1  2  1  0  0  0  0
  1  6  1  0  0  0  0
  1  7  1  0  0  0  0
  2  3  1  0  0  0  0
  2 80  1  0  0  0  0
  3  4  1  0  0  0  0
  3 33  1  0  0  0  0
  4  5  1  0  0  0  0
  4 68  1  0  0  0  0
  5  6  1  0  0  0  0
  5 69  1  0  0  0  0
  7  8  1  0  0  0  0
  7 31  1  0  0  0  0
  8  9  1  0  0  0  0
  8 13  1  0  0  0  0
  8 32  1  0  0  0  0
  9 10  1  0  0  0  0
 10 11  1  0  0  0  0
 10 81  1  0  0  0  0
 11 12  1  0  0  0  0
 11 82  1  0  0  0  0
 12 13  1  0  0  0  0
 12 14  1  0  0  0  0
 14 15  1  0  0  0  0
 15 16  1  0  0  0  0
 16 17  1  0  0  0  0
 17 18  2  0  0  0  0
 18 19  1  0  0  0  0
 19 20  1  0  0  0  0
 19 24  1  0  0  0  0
 20 21  1  0  0  0  0
 21 22  1  0  0  0  0
 21 54  1  0  0  0  0
 22 23  1  0  0  0  0
 23 24  1  0  0  0  0
 23 27  1  0  0  0  0
 25 26  1  0  0  0  0
 25 29  1  0  0  0  0
 25 30  1  0  0  0  0
 26 23  1  0  0  0  0
 27 28  1  0  0  0  0
 28 29  1  0  0  0  0
 28 55  1  0  0  0  0
 30 49  1  0  0  0  0
 33 34  1  0  0  0  0
 34 35  1  0  0  0  0
 34 36  2  0  0  0  0
 35 37  1  0  0  0  0
 37 38  1  0  0  0  0
 37 42  1  0  0  0  0
 38 39  1  0  0  0  0
 39 40  1  0  0  0  0
 39 46  1  0  0  0  0
 40 41  1  0  0  0  0
 41 42  1  0  0  0  0
 41 64  1  0  0  0  0
 43 44  1  0  0  0  0
 43 47  1  0  0  0  0
 44 45  1  0  0  0  0
 44 62  1  0  0  0  0
 44 63  1  0  0  0  0
 45 39  1  0  0  0  0
 46 47  1  0  0  0  0
 47 48  1  0  0  0  0
 49 50  1  0  0  0  0
 49 57  2  0  0  0  0
 50 51  1  0  0  0  0
 50 58  1  0  0  0  0
 51 52  1  0  0  0  0
 51 59  1  0  0  0  0
 52 53  1  0  0  0  0
 52 60  1  0  0  0  0
 53 48  1  0  0  0  0
 53 61  2  0  0  0  0
 55 56  1  0  0  0  0
 59 83  1  0  0  0  0
 64 65  1  0  0  0  0
 65 66  1  0  0  0  0
 65 67  2  0  0  0  0
 69 70  1  0  0  0  0
 70 71  1  0  0  0  0
 70 76  2  0  0  0  0
 71 72  1  0  0  0  0
 72 73  1  0  0  0  0
 72 77  1  0  0  0  0
 73 74  2  0  0  0  0
 74 75  1  0  0  0  0
 75 78  2  0  0  0  0
 75 79  1  0  0  0  0
 83 84  1  0  0  0  0
 83 85  2  0  0  0  0
M  END
26
 

 90 96  0  0  0  0  0  0  0  0999 V2000
    4.3169    3.1565    0.0000 N   0  0  0  0  0  0  0  0  0  0  0  0
    4.4462    3.9894    0.0000 C   0  0  3  0  0  0  0  0  0  0  0  0
    5.2041    4.1925    0.0000 C   0  0  0  0  0  0  0  0  0  0  0  0
    5.4921    4.9161    0.0000 O   0  0  0  0  0  0  0  0  0  0  0  0
    5.7787    3.5918    0.0000 N   0  0  0  0  0  0  0  0  0  0  0  0
    6.5339    3.8225    0.0000 C   0  0  3  0  0  0  0  0  0  0  0  0
    7.1249    3.2961    0.0000 C   0  0  0  0  0  0  0  0  0  0  0  0
    6.9631    2.5085    0.0000 C   0  0  0  0  0  0  0  0  0  0  0  0
    7.8975    3.5145    0.0000 C   0  0  0  0  0  0  0  0  0  0  0  0
    6.7147    4.6243    0.0000 C   0  0  0  0  0  0  0  0  0  0  0  0
    6.0594    5.1238    0.0000 O   0  0  0  0  0  0  0  0  0  0  0  0
    7.4041    4.9133    0.0000 N   0  0  0  0  0  0  0  0  0  0  0  0
    7.5137    5.7602    0.0000 C   0  0  3  0  0  0  0  0  0  0  0  0
    6.9081    6.2181    0.0000 C   0  0  0  0  0  0  0  0  0  0  0  0
    6.1774    5.8138    0.0000 O   0  0  0  0  0  0  0  0  0  0  0  0
    6.9057    7.0039    0.0000 N   0  0  0  0  0  0  0  0  0  0  0  0
    6.3199    7.5193    0.0000 C   0  0  0  0  0  0  0  0  0  0  0  0
    5.5168    7.3835    0.0000 C   0  0  0  0  0  0  0  0  0  0  0  0
    5.0637    8.0674    0.0000 O   0  0  0  0  0  0  0  0  0  0  0  0
    5.1968    6.7110    0.0000 N   0  0  0  0  0  0  0  0  0  0  0  0
    5.6532    6.0086    0.0000 C   0  0  0  0  0  0  0  0  0  0  0  0
    4.4168    6.4920    0.0000 C   0  0  3  0  0  0  0  0  0  0  0  0
    3.8274    6.9860    0.0000 C   0  0  0  0  0  0  0  0  0  0  0  0
    3.0491    6.7405    0.0000 C   0  0  0  0  0  0  0  0  0  0  0  0
    3.9480    7.7950    0.0000 C   0  0  0  0  0  0  0  0  0  0  0  0
    4.3378    5.6837    0.0000 C   0  0  0  0  0  0  0  0  0  0  0  0
    5.0963    5.3433    0.0000 O   0  0  0  0  0  0  0  0  0  0  0  0
    3.7381    5.2211    0.0000 O   0  0  0  0  0  0  0  0  0  0  0  0
    3.8031    4.4182    0.0000 C   0  0  3  0  0  0  0  0  0  0  0  0
    3.0805    4.0139    0.0000 C   0  0  0  0  0  0  0  0  0  0  0  0
    7.6781    7.3250    0.0000 C   0  0  0  0  0  0  0  0  0  0  0  0
    8.3058    5.9137    0.0000 C   0  0  0  0  0  0  0  0  0  0  0  0
    8.7220    5.1708    0.0000 C   0  0  0  0  0  0  0  0  0  0  0  0
    8.1418    4.5716    0.0000 C   0  0  0  0  0  0  0  0  0  0  0  0
    3.6672    2.7216    0.0000 C   0  0  0  0  0  0  0  0  0  0  0  0
    2.9386    3.0722    0.0000 O   0  0  0  0  0  0  0  0  0  0  0  0
    3.6685    1.9399    0.0000 C   0  0  0  0  0  0  0  0  0  0  0  0
    4.3628    1.5459    0.0000 C   0  0  0  0  0  0  0  0  0  0  0  0
    5.0494    1.9541    0.0000 N   0  0  0  0  0  0  0  0  0  0  0  0
    4.3706    0.7473    0.0000 C   0  0  0  0  0  0  0  0  0  0  0  0
    5.0709    0.3540    0.0000 O   0  0  0  0  0  0  0  0  0  0  0  0
    3.6825    0.3375    0.0000 C   0  0  0  0  0  0  0  0  0  0  0  0
    2.9850    0.7352    0.0000 C   0  0  0  0  0  0  0  0  0  0  0  0
    2.2994    0.3247    0.0000 O   0  0  0  0  0  0  0  0  0  0  0  0
    1.5981    0.7219    0.0000 C   0  0  0  0  0  0  0  0  0  0  0  0
    0.9077    0.3312    0.0000 C   0  0  0  0  0  0  0  0  0  0  0  0
    0.2134    0.7291    0.0000 C   0  0  0  0  0  0  0  0  0  0  0  0
    0.2091    1.5173    0.0000 C   0  0  0  0  0  0  0  0  0  0  0  0
    0.8966    1.9221    0.0000 C   0  0  0  0  0  0  0  0  0  0  0  0
    0.9013    2.7000    0.0000 C   0  0  0  0  0  0  0  0  0  0  0  0
    1.6688    3.0229    0.0000 O   0  0  0  0  0  0  0  0  0  0  0  0
    1.5960    1.5193    0.0000 C   0  0  0  0  0  0  0  0  0  0  0  0
    2.2805    1.9233    0.0000 N   0  0  0  0  0  0  0  0  0  0  0  0
    2.9762    1.5321    0.0000 C   0  0  0  0  0  0  0  0  0  0  0  0
    0.8989   -0.4784    0.0000 C   0  0  0  0  0  0  0  0  0  0  0  0
    3.6909   -0.4571    0.0000 C   0  0  0  0  0  0  0  0  0  0  0  0
    0.3085    3.1324    0.0000 N   0  0  0  0  0  0  0  0  0  0  0  0
    0.1792    3.9654    0.0000 C   0  0  3  0  0  0  0  0  0  0  0  0
   -0.5786    4.1684    0.0000 C   0  0  0  0  0  0  0  0  0  0  0  0
   -0.8667    4.8921    0.0000 O   0  0  0  0  0  0  0  0  0  0  0  0
   -1.1533    3.5678    0.0000 N   0  0  0  0  0  0  0  0  0  0  0  0
   -1.9085    3.7984    0.0000 C   0  0  3  0  0  0  0  0  0  0  0  0
   -2.4995    3.2721    0.0000 C   0  0  0  0  0  0  0  0  0  0  0  0
   -2.3377    2.4845    0.0000 C   0  0  0  0  0  0  0  0  0  0  0  0
   -3.2721    3.4905    0.0000 C   0  0  0  0  0  0  0  0  0  0  0  0
   -2.0893    4.6002    0.0000 C   0  0  0  0  0  0  0  0  0  0  0  0
   -1.4340    5.0998    0.0000 O   0  0  0  0  0  0  0  0  0  0  0  0
   -2.7787    4.8893    0.0000 N   0  0  0  0  0  0  0  0  0  0  0  0
   -2.8883    5.7362    0.0000 C   0  0  3  0  0  0  0  0  0  0  0  0
   -2.2827    6.1940    0.0000 C   0  0  0  0  0  0  0  0  0  0  0  0
   -1.5520    5.7898    0.0000 O   0  0  0  0  0  0  0  0  0  0  0  0
   -2.2803    6.9799    0.0000 N   0  0  0  0  0  0  0  0  0  0  0  0
   -1.6944    7.4953    0.0000 C   0  0  0  0  0  0  0  0  0  0  0  0
   -0.8914    7.3594    0.0000 C   0  0  0  0  0  0  0  0  0  0  0  0
   -0.4383    8.0434    0.0000 O   0  0  0  0  0  0  0  0  0  0  0  0
   -0.5714    6.6870    0.0000 N   0  0  0  0  0  0  0  0  0  0  0  0
   -1.0278    5.9846    0.0000 C   0  0  0  0  0  0  0  0  0  0  0  0
    0.2086    6.4680    0.0000 C   0  0  3  0  0  0  0  0  0  0  0  0
    0.7980    6.9620    0.0000 C   0  0  0  0  0  0  0  0  0  0  0  0
    1.5763    6.7164    0.0000 C   0  0  0  0  0  0  0  0  0  0  0  0
    0.6775    7.7709    0.0000 C   0  0  0  0  0  0  0  0  0  0  0  0
    0.2876    5.6597    0.0000 C   0  0  0  0  0  0  0  0  0  0  0  0
   -0.4708    5.3193    0.0000 O   0  0  0  0  0  0  0  0  0  0  0  0
    0.8873    5.1971    0.0000 O   0  0  0  0  0  0  0  0  0  0  0  0
    0.8223    4.3941    0.0000 C   0  0  3  0  0  0  0  0  0  0  0  0
    1.5450    3.9899    0.0000 C   0  0  0  0  0  0  0  0  0  0  0  0
   -3.0526    7.3010    0.0000 C   0  0  0  0  0  0  0  0  0  0  0  0
   -3.6804    5.8897    0.0000 C   0  0  0  0  0  0  0  0  0  0  0  0
   -4.0966    5.1468    0.0000 C   0  0  0  0  0  0  0  0  0  0  0  0
   -3.5164    4.5476    0.0000 C   0  0  0  0  0  0  0  0  0  0  0  0
  2  1  1  0  0  0  0
  2 29  1  0  0  0  0
  3  2  1  0  0  0  0
  4  3  2  0  0  0  0
  5  3  1  0  0  0  0
  6  5  1  0  0  0  0
  7  6  1  0  0  0  0
  8  7  1  0  0  0  0
  9  7  1  0  0  0  0
 10  6  1  0  0  0  0
 11 10  2  0  0  0  0
 12 10  1  0  0  0  0
 12 34  1  0  0  0  0
 13 12  1  0  0  0  0
 14 13  1  0  0  0  0
 15 14  2  0  0  0  0
 16 14  1  0  0  0  0
 17 16  1  0  0  0  0
 18 17  1  0  0  0  0
 19 18  2  0  0  0  0
 20 18  1  0  0  0  0
 21 20  1  0  0  0  0
 22 20  1  0  0  0  0
 23 22  1  0  0  0  0
 24 23  1  0  0  0  0
 25 23  1  0  0  0  0
 26 22  1  0  0  0  0
 27 26  2  0  0  0  0
 28 26  1  0  0  0  0
 29 28  1  0  0  0  0
 30 29  1  0  0  0  0
 31 16  1  0  0  0  0
 32 13  1  0  0  0  0
 33 32  1  0  0  0  0
 34 33  1  0  0  0  0
 35  1  1  0  0  0  0
 36 35  2  0  0  0  0
 37 35  1  0  0  0  0
 37 54  2  0  0  0  0
 38 37  1  0  0  0  0
 39 38  1  0  0  0  0
 40 38  2  0  0  0  0
 41 40  1  0  0  0  0
 42 40  1  0  0  0  0
 43 42  2  0  0  0  0
 43 54  1  0  0  0  0
 44 43  1  0  0  0  0
 45 44  1  0  0  0  0
 45 52  2  0  0  0  0
 46 45  1  0  0  0  0
 47 46  2  0  0  0  0
 48 47  1  0  0  0  0
 49 48  2  0  0  0  0
 50 49  1  0  0  0  0
 51 50  2  0  0  0  0
 52 49  1  0  0  0  0
 53 52  1  0  0  0  0
 54 53  1  0  0  0  0
 55 46  1  0  0  0  0
 56 42  1  0  0  0  0
 57 50  1  0  0  0  0
 58 57  1  0  0  0  0
 58 85  1  0  0  0  0
 59 58  1  0  0  0  0
 60 59  2  0  0  0  0
 61 59  1  0  0  0  0
 62 61  1  0  0  0  0
 63 62  1  0  0  0  0
 64 63  1  0  0  0  0
 65 63  1  0  0  0  0
 66 62  1  0  0  0  0
 67 66  2  0  0  0  0
 68 66  1  0  0  0  0
 68 90  1  0  0  0  0
 69 68  1  0  0  0  0
 70 69  1  0  0  0  0
 71 70  2  0  0  0  0
 72 70  1  0  0  0  0
 73 72  1  0  0  0  0
 74 73  1  0  0  0  0
 75 74  2  0  0  0  0
 76 74  1  0  0  0  0
 77 76  1  0  0  0  0
 78 76  1  0  0  0  0
 79 78  1  0  0  0  0
 80 79  1  0  0  0  0
 81 79  1  0  0  0  0
 82 78  1  0  0  0  0
 83 82  2  0  0  0  0
 84 82  1  0  0  0  0
 85 84  1  0  0  0  0
 86 85  1  0  0  0  0
 87 72  1  0  0  0  0
 88 69  1  0  0  0  0
 89 88  1  0  0  0  0
 90 89  1  0  0  0  0
M  END
27
 

101110  0  0  0  0  0  0  0  0999 V2000
   -6.1671    1.4440    0.0000 C   0  0  3  0  0  0  0  0  0  0  0  0
   -5.6089    1.9689    0.0000 C   0  0  3  0  0  0  0  0  0  0  0  0
   -4.8722    1.6544    0.0000 O   0  0  0  0  0  0  0  0  0  0  0  0
   -5.4970    2.7320    0.0000 C   0  0  0  0  0  0  0  0  0  0  0  0
   -6.0395    3.3057    0.0000 C   0  0  0  0  0  0  0  0  0  0  0  0
   -5.8064    4.0840    0.0000 C   0  0  0  0  0  0  0  0  0  0  0  0
   -5.0331    4.2820    0.0000 C   0  0  0  0  0  0  0  0  0  0  0  0
   -4.4727    3.6896    0.0000 C   0  0  0  0  0  0  0  0  0  0  0  0
   -3.7009    3.8917    0.0000 O   0  0  0  0  0  0  0  0  0  0  0  0
   -3.0836    3.4056    0.0000 C   0  0  0  0  0  0  0  0  0  0  0  0
   -2.3478    3.7907    0.0000 C   0  0  0  0  0  0  0  0  0  0  0  0
   -2.3779    4.5870    0.0000 O   0  0  0  0  0  0  0  0  0  0  0  0
   -1.6953    3.3719    0.0000 C   0  0  0  0  0  0  0  0  0  0  0  0
   -1.7035    2.5753    0.0000 C   0  0  0  0  0  0  0  0  0  0  0  0
   -2.4233    2.1762    0.0000 C   0  0  0  0  0  0  0  0  0  0  0  0
   -3.0905    2.6108    0.0000 C   0  0  0  0  0  0  0  0  0  0  0  0
   -2.4155    1.3878    0.0000 C   0  0  3  0  0  0  0  0  0  0  0  0
   -2.9480    0.8414    0.0000 N   0  0  0  0  0  0  0  0  0  0  0  0
   -3.6772    1.0406    0.0000 C   0  0  0  0  0  0  0  0  0  0  0  0
   -3.9030    1.8393    0.0000 O   0  0  0  0  0  0  0  0  0  0  0  0
   -4.3002    0.5111    0.0000 C   0  0  3  0  0  0  0  0  0  0  0  0
   -4.1662   -0.2712    0.0000 C   0  0  0  0  0  0  0  0  0  0  0  0
   -3.4082   -0.5448    0.0000 C   0  0  0  0  0  0  0  0  0  0  0  0
   -3.2804   -1.3370    0.0000 N   0  0  0  0  0  0  0  0  0  0  0  0
   -2.7849   -0.0337    0.0000 O   0  0  0  0  0  0  0  0  0  0  0  0
   -4.9916    0.8516    0.0000 N   0  0  0  0  0  0  0  0  0  0  0  0
   -5.7503    0.6595    0.0000 C   0  0  0  0  0  0  0  0  0  0  0  0
   -6.1556    0.0399    0.0000 O   0  0  0  0  0  0  0  0  0  0  0  0
   -1.5708    1.1195    0.0000 C   0  0  0  0  0  0  0  0  0  0  0  0
   -0.9875    1.6625    0.0000 O   0  0  0  0  0  0  0  0  0  0  0  0
   -1.4183    0.3483    0.0000 N   0  0  0  0  0  0  0  0  0  0  0  0
   -0.6456    0.1112    0.0000 C   0  0  3  0  0  0  0  0  0  0  0  0
   -0.4645   -0.6662    0.0000 C   0  0  0  0  0  0  0  0  0  0  0  0
    0.2722   -0.9918    0.0000 C   0  0  0  0  0  0  0  0  0  0  0  0
    0.3918   -1.7736    0.0000 C   0  0  0  0  0  0  0  0  0  0  0  0
   -0.2708   -2.2578    0.0000 C   0  0  0  0  0  0  0  0  0  0  0  0
   -0.2188   -3.0331    0.0000 O   0  0  0  0  0  0  0  0  0  0  0  0
   -1.0040   -1.9406    0.0000 C   0  0  0  0  0  0  0  0  0  0  0  0
   -1.1134   -1.1643    0.0000 C   0  0  0  0  0  0  0  0  0  0  0  0
    1.1020   -2.1421    0.0000 C   0  0  0  0  0  0  0  0  0  0  0  0
    1.0253   -2.9824    0.0000 C   0  0  0  0  0  0  0  0  0  0  0  0
    0.3229   -3.3016    0.0000 O   0  0  0  0  0  0  0  0  0  0  0  0
    1.6584   -3.4424    0.0000 C   0  0  0  0  0  0  0  0  0  0  0  0
    2.4022   -3.1256    0.0000 C   0  0  0  0  0  0  0  0  0  0  0  0
    3.0441   -3.6150    0.0000 O   0  0  0  0  0  0  0  0  0  0  0  0
    2.4863   -2.3499    0.0000 C   0  0  0  0  0  0  0  0  0  0  0  0
    1.8041   -1.8525    0.0000 C   0  0  0  0  0  0  0  0  0  0  0  0
    2.0565   -1.0900    0.0000 C   0  0  3  0  0  0  0  0  0  0  0  0
    1.6303   -0.4603    0.0000 N   0  0  0  0  0  0  0  0  0  0  0  0
    1.9684    0.2960    0.0000 C   0  0  0  0  0  0  0  0  0  0  0  0
    2.6924    0.4655    0.0000 O   0  0  0  0  0  0  0  0  0  0  0  0
    1.3387    0.8513    0.0000 C   0  0  3  0  0  0  0  0  0  0  0  0
    0.6597    0.4470    0.0000 N   0  0  0  0  0  0  0  0  0  0  0  0
   -0.0697    0.6871    0.0000 C   0  0  0  0  0  0  0  0  0  0  0  0
   -0.2962    1.4503    0.0000 O   0  0  0  0  0  0  0  0  0  0  0  0
    1.4601    1.6055    0.0000 C   0  0  3  0  0  0  0  0  0  0  0  0
    2.2187    1.9137    0.0000 O   0  0  0  0  0  0  0  0  0  0  0  0
    0.8599    2.1476    0.0000 C   0  0  0  0  0  0  0  0  0  0  0  0
    0.1041    1.8896    0.0000 C   0  0  0  0  0  0  0  0  0  0  0  0
   -0.4965    2.4148    0.0000 C   0  0  0  0  0  0  0  0  0  0  0  0
   -1.2541    2.1692    0.0000 Cl  0  0  0  0  0  0  0  0  0  0  0  0
   -0.3332    3.2057    0.0000 C   0  0  0  0  0  0  0  0  0  0  0  0
   -0.9517    3.7184    0.0000 O   0  0  0  0  0  0  0  0  0  0  0  0
    0.4185    3.4620    0.0000 C   0  0  0  0  0  0  0  0  0  0  0  0
    1.0229    2.9260    0.0000 C   0  0  0  0  0  0  0  0  0  0  0  0
    2.8849   -1.0002    0.0000 C   0  0  0  0  0  0  0  0  0  0  0  0
    3.1858   -0.2716    0.0000 O   0  0  0  0  0  0  0  0  0  0  0  0
    3.3275   -1.6539    0.0000 O   0  0  0  0  0  0  0  0  0  0  0  0
   -4.6984    2.9470    0.0000 C   0  0  0  0  0  0  0  0  0  0  0  0
   -4.1553    2.3387    0.0000 Cl  0  0  0  0  0  0  0  0  0  0  0  0
   -1.6795    5.0261    0.0000 C   0  0  3  0  0  0  0  0  0  0  0  0
   -0.9650    6.2637    0.0000 C   0  0  3  0  0  0  0  0  0  0  0  0
   -1.6795    5.8512    0.0000 C   0  0  3  0  0  0  0  0  0  0  0  0
   -0.9650    4.6136    0.0000 C   0  0  0  0  0  0  0  0  0  0  0  0
   -0.2505    5.0261    0.0000 C   0  0  3  0  0  0  0  0  0  0  0  0
   -0.2505    5.8512    0.0000 C   0  0  3  0  0  0  0  0  0  0  0  0
   -2.3939    6.2637    0.0000 O   0  0  0  0  0  0  0  0  0  0  0  0
   -2.3939    7.0887    0.0000 C   0  0  3  0  0  0  0  0  0  0  0  0
   -2.3939    8.7387    0.0000 C   0  0  3  0  0  0  0  0  0  0  0  0
   -3.1084    8.3262    0.0000 C   0  0  3  0  0  0  0  0  0  0  0  0
   -3.1084    7.5012    0.0000 C   0  0  0  0  0  0  0  0  0  0  0  0
   -1.6795    7.5012    0.0000 O   0  0  0  0  0  0  0  0  0  0  0  0
   -1.6795    8.3262    0.0000 C   0  0  3  0  0  0  0  0  0  0  0  0
   -2.3939    9.5637    0.0000 O   0  0  0  0  0  0  0  0  0  0  0  0
   -0.9650    8.7387    0.0000 C   0  0  0  0  0  0  0  0  0  0  0  0
   -3.5209    9.0407    0.0000 C   0  0  0  0  0  0  0  0  0  0  0  0
   -3.9053    8.1127    0.0000 N   0  0  0  0  0  0  0  0  0  0  0  0
   -0.9650    7.0887    0.0000 O   0  0  0  0  0  0  0  0  0  0  0  0
    0.4639    6.2637    0.0000 O   0  0  0  0  0  0  0  0  0  0  0  0
    0.4639    4.6136    0.0000 C   0  0  0  0  0  0  0  0  0  0  0  0
    1.1784    5.0261    0.0000 O   0  0  0  0  0  0  0  0  0  0  0  0
   -6.9921    1.4440    0.0000 N   0  0  0  0  0  0  0  0  0  0  0  0
   -7.4046    2.1585    0.0000 C   0  0  0  0  0  0  0  0  0  0  0  0
   -8.2296    2.1585    0.0000 C   0  0  3  0  0  0  0  0  0  0  0  0
   -6.9921    2.8730    0.0000 O   0  0  0  0  0  0  0  0  0  0  0  0
   -8.6421    2.8730    0.0000 C   0  0  0  0  0  0  0  0  0  0  0  0
   -8.6421    1.4440    0.0000 N   0  0  0  0  0  0  0  0  0  0  0  0
   -9.4671    1.4440    0.0000 C   0  0  0  0  0  0  0  0  0  0  0  0
   -9.4671    2.8730    0.0000 C   0  0  0  0  0  0  0  0  0  0  0  0
   -9.8796    3.5874    0.0000 C   0  0  0  0  0  0  0  0  0  0  0  0
   -9.8796    2.1585    0.0000 C   0  0  0  0  0  0  0  0  0  0  0  0
  1 27  1  0  0  0  0
  1 92  1  0  0  0  0
  2  1  1  0  0  0  0
  3  2  1  0  0  0  0
  4  2  1  0  0  0  0
  4 69  2  0  0  0  0
  4  5  1  0  0  0  0
  6  5  2  0  0  0  0
  6  7  1  0  0  0  0
  8  7  2  0  0  0  0
  8 69  1  0  0  0  0
  9  8  1  0  0  0  0
 10  9  1  0  0  0  0
 10 16  2  0  0  0  0
 10 11  1  0  0  0  0
 12 11  1  0  0  0  0
 12 71  1  0  0  0  0
 13 11  2  0  0  0  0
 13 63  1  0  0  0  0
 13 14  1  0  0  0  0
 15 14  2  0  0  0  0
 15 16  1  0  0  0  0
 17 15  1  0  0  0  0
 18 17  1  0  0  0  0
 19 18  1  0  0  0  0
 20 19  2  0  0  0  0
 21 19  1  0  0  0  0
 22 21  1  0  0  0  0
 23 22  1  0  0  0  0
 24 23  1  0  0  0  0
 25 23  2  0  0  0  0
 26 21  1  0  0  0  0
 27 26  1  0  0  0  0
 28 27  2  0  0  0  0
 29 17  1  0  0  0  0
 30 29  2  0  0  0  0
 31 29  1  0  0  0  0
 32 31  1  0  0  0  0
 32 54  1  0  0  0  0
 33 32  1  0  0  0  0
 33 39  2  0  0  0  0
 33 34  1  0  0  0  0
 35 34  2  0  0  0  0
 35 36  1  0  0  0  0
 37 36  1  0  0  0  0
 38 36  2  0  0  0  0
 38 39  1  0  0  0  0
 40 35  1  0  0  0  0
 40 47  2  0  0  0  0
 41 40  1  0  0  0  0
 42 41  1  0  0  0  0
 43 41  2  0  0  0  0
 44 43  1  0  0  0  0
 45 44  1  0  0  0  0
 46 44  2  0  0  0  0
 47 46  1  0  0  0  0
 48 47  1  0  0  0  0
 49 48  1  0  0  0  0
 50 49  1  0  0  0  0
 51 50  2  0  0  0  0
 52 50  1  0  0  0  0
 53 52  1  0  0  0  0
 54 53  1  0  0  0  0
 55 54  2  0  0  0  0
 56 52  1  0  0  0  0
 57 56  1  0  0  0  0
 58 56  1  0  0  0  0
 58 65  2  0  0  0  0
 58 59  1  0  0  0  0
 60 59  2  0  0  0  0
 60 62  1  0  0  0  0
 61 60  1  0  0  0  0
 63 62  1  0  0  0  0
 64 62  2  0  0  0  0
 64 65  1  0  0  0  0
 66 48  1  0  0  0  0
 67 66  1  0  0  0  0
 68 66  2  0  0  0  0
 70 69  1  0  0  0  0
 71 74  1  0  0  0  0
 72 73  1  0  0  0  0
 72 76  1  0  0  0  0
 72 88  1  0  0  0  0
 73 71  1  0  0  0  0
 73 77  1  0  0  0  0
 74 75  1  0  0  0  0
 75 76  1  0  0  0  0
 75 90  1  0  0  0  0
 76 89  1  0  0  0  0
 77 78  1  0  0  0  0
 78 82  1  0  0  0  0
 79 80  1  0  0  0  0
 79 83  1  0  0  0  0
 79 84  1  0  0  0  0
 80 81  1  0  0  0  0
 80 86  1  0  0  0  0
 80 87  1  0  0  0  0
 81 78  1  0  0  0  0
 82 83  1  0  0  0  0
 83 85  1  0  0  0  0
 90 91  1  0  0  0  0
 92 93  1  0  0  0  0
 93 94  1  0  0  0  0
 93 95  2  0  0  0  0
 94 96  1  0  0  0  0
 94 97  1  0  0  0  0
 96 99  1  0  0  0  0
 97 98  1  0  0  0  0
 99100  1  0  0  0  0
 99101  1  0  0  0  0
M  END
28
 

 64 68  0  0  0  0  0  0  0  0999 V2000
    0.9050   -0.6986    0.0000 N   0  0  0  0  0  0  0  0  0  0  0  0
    1.3813   -1.4031    0.0000 C   0  0  3  0  0  0  0  0  0  0  0  0
    2.1914   -1.3893    0.0000 C   0  0  0  0  0  0  0  0  0  0  0  0
    2.4794   -0.6292    0.0000 O   0  0  0  0  0  0  0  0  0  0  0  0
    2.8168   -1.8828    0.0000 N   0  0  0  0  0  0  0  0  0  0  0  0
    3.6348   -1.7305    0.0000 C   0  0  3  0  0  0  0  0  0  0  0  0
    4.1589   -2.3975    0.0000 C   0  0  0  0  0  0  0  0  0  0  0  0
    3.7830   -3.1460    0.0000 O   0  0  0  0  0  0  0  0  0  0  0  0
    4.9609   -2.4137    0.0000 N   0  0  0  0  0  0  0  0  0  0  0  0
    5.5546   -1.8243    0.0000 C   0  0  0  0  0  0  0  0  0  0  0  0
    5.6640   -1.0079    0.0000 C   0  0  0  0  0  0  0  0  0  0  0  0
    5.0223   -0.5302    0.0000 O   0  0  0  0  0  0  0  0  0  0  0  0
    6.4410   -0.6973    0.0000 N   0  0  0  0  0  0  0  0  0  0  0  0
    6.7958   -0.0072    0.0000 C   0  0  3  0  0  0  0  0  0  0  0  0
    6.7393    0.7961    0.0000 C   0  0  0  0  0  0  0  0  0  0  0  0
    7.4907    1.2344    0.0000 O   0  0  0  0  0  0  0  0  0  0  0  0
    6.0760    1.3074    0.0000 N   0  0  0  0  0  0  0  0  0  0  0  0
    6.2347    2.1253    0.0000 C   0  0  0  0  0  0  0  0  0  0  0  0
    5.7790    2.7776    0.0000 C   0  0  0  0  0  0  0  0  0  0  0  0
    6.1934    3.5464    0.0000 O   0  0  0  0  0  0  0  0  0  0  0  0
    4.9585    2.8553    0.0000 N   0  0  0  0  0  0  0  0  0  0  0  0
    4.5186    2.1239    0.0000 C   0  0  3  0  0  0  0  0  0  0  0  0
    5.2523    1.5328    0.0000 C   0  0  0  0  0  0  0  0  0  0  0  0
    5.5671    0.6318    0.0000 S   0  0  3  0  0  0  0  0  0  0  0  0
    6.2971    0.4113    0.0000 O   0  0  0  0  0  0  0  0  0  0  0  0
    4.8330    0.1166    0.0000 C   0  0  0  0  0  0  0  0  0  0  0  0
    4.3464   -0.4814    0.0000 C   0  0  0  0  0  0  0  0  0  0  0  0
    4.3667   -1.2816    0.0000 C   0  0  0  0  0  0  0  0  0  0  0  0
    3.7254    2.0767    0.0000 C   0  0  0  0  0  0  0  0  0  0  0  0
    3.3964    1.3748    0.0000 O   0  0  0  0  0  0  0  0  0  0  0  0
    3.0955    2.5136    0.0000 N   0  0  0  0  0  0  0  0  0  0  0  0
    2.2554    2.5027    0.0000 C   0  0  3  0  0  0  0  0  0  0  0  0
    1.7940    1.8296    0.0000 C   0  0  0  0  0  0  0  0  0  0  0  0
    2.3183    1.2620    0.0000 O   0  0  0  0  0  0  0  0  0  0  0  0
    1.0582    1.5931    0.0000 N   0  0  0  0  0  0  0  0  0  0  0  0
    0.7192    0.7808    0.0000 C   0  0  3  0  0  0  0  0  0  0  0  0
    1.1005    0.0769    0.0000 C   0  0  0  0  0  0  0  0  0  0  0  0
    1.8788    0.1718    0.0000 O   0  0  0  0  0  0  0  0  0  0  0  0
   -0.1395    0.8455    0.0000 C   0  0  0  0  0  0  0  0  0  0  0  0
   -0.3431    1.6951    0.0000 C   0  0  3  0  0  0  0  0  0  0  0  0
    0.3850    2.1538    0.0000 C   0  0  0  0  0  0  0  0  0  0  0  0
   -1.0520    1.9802    0.0000 O   0  0  0  0  0  0  0  0  0  0  0  0
    1.8422    3.2579    0.0000 C   0  0  0  0  0  0  0  0  0  0  0  0
    2.2853    3.9464    0.0000 C   0  0  0  0  0  0  0  0  0  0  0  0
    1.8967    4.6949    0.0000 O   0  0  0  0  0  0  0  0  0  0  0  0
    3.1165    3.9409    0.0000 N   0  0  0  0  0  0  0  0  0  0  0  0
    7.6525   -0.1918    0.0000 C   0  0  3  0  0  0  0  0  0  0  0  0
    7.8894   -0.9718    0.0000 C   0  0  0  0  0  0  0  0  0  0  0  0
    8.1846    0.4719    0.0000 C   0  0  0  0  0  0  0  0  0  0  0  0
    0.9675   -2.1442    0.0000 C   0  0  3  0  0  0  0  0  0  0  0  0
    0.1417   -2.1379    0.0000 C   0  0  3  0  0  0  0  0  0  0  0  0
   -0.2905   -1.4259    0.0000 O   0  0  0  0  0  0  0  0  0  0  0  0
   -0.2730   -2.8681    0.0000 C   0  0  0  0  0  0  0  0  0  0  0  0
    0.1378   -3.5868    0.0000 O   0  0  0  0  0  0  0  0  0  0  0  0
    1.3881   -2.8439    0.0000 C   0  0  0  0  0  0  0  0  0  0  0  0
    3.5769   -0.1839    0.0000 C   0  0  0  0  0  0  0  0  0  0  0  0
    3.6221    0.6399    0.0000 C   0  0  0  0  0  0  0  0  0  0  0  0
    4.4194    0.8515    0.0000 N   0  0  0  0  0  0  0  0  0  0  0  0
    2.8409   -0.5567    0.0000 C   0  0  0  0  0  0  0  0  0  0  0  0
    2.1501   -0.1057    0.0000 C   0  0  0  0  0  0  0  0  0  0  0  0
    2.1953    0.7181    0.0000 C   0  0  0  0  0  0  0  0  0  0  0  0
    2.9312    1.0909    0.0000 C   0  0  0  0  0  0  0  0  0  0  0  0
    1.5044    1.1690    0.0000 O   0  0  0  0  0  0  0  0  0  0  0  0
    8.6796   -1.2088    0.0000 C   0  0  0  0  0  0  0  0  0  0  0  0
  1 37  1  0  0  0  0
  2  1  1  0  0  0  0
  3  2  1  0  0  0  0
  4  3  2  0  0  0  0
  5  3  1  0  0  0  0
  6  5  1  0  0  0  0
  6 28  1  0  0  0  0
  7  6  1  0  0  0  0
  8  7  2  0  0  0  0
  9  7  1  0  0  0  0
 10  9  1  0  0  0  0
 11 10  1  0  0  0  0
 12 11  2  0  0  0  0
 13 11  1  0  0  0  0
 14 13  1  0  0  0  0
 15 14  1  0  0  0  0
 16 15  2  0  0  0  0
 17 15  1  0  0  0  0
 18 17  1  0  0  0  0
 19 18  1  0  0  0  0
 20 19  2  0  0  0  0
 21 19  1  0  0  0  0
 22 21  1  0  0  0  0
 23 22  1  0  0  0  0
 24 23  1  0  0  0  0
 25 24  2  0  0  0  0
 26 24  1  0  0  0  0
 26 58  1  0  0  0  0
 27 26  2  0  0  0  0
 27 56  1  0  0  0  0
 28 27  1  0  0  0  0
 29 22  1  0  0  0  0
 30 29  2  0  0  0  0
 31 29  1  0  0  0  0
 32 31  1  0  0  0  0
 33 32  1  0  0  0  0
 34 33  2  0  0  0  0
 35 33  1  0  0  0  0
 35 41  1  0  0  0  0
 36 35  1  0  0  0  0
 37 36  1  0  0  0  0
 38 37  2  0  0  0  0
 39 36  1  0  0  0  0
 40 39  1  0  0  0  0
 41 40  1  0  0  0  0
 42 40  1  0  0  0  0
 43 32  1  0  0  0  0
 44 43  1  0  0  0  0
 45 44  2  0  0  0  0
 46 44  1  0  0  0  0
 47 14  1  0  0  0  0
 48 47  1  0  0  0  0
 48 64  1  0  0  0  0
 49 47  1  0  0  0  0
 50  2  1  0  0  0  0
 51 50  1  0  0  0  0
 52 51  1  0  0  0  0
 53 51  1  0  0  0  0
 54 53  1  0  0  0  0
 55 50  1  0  0  0  0
 56 59  2  0  0  0  0
 57 58  1  0  0  0  0
 57 62  2  0  0  0  0
 57 56  1  0  0  0  0
 59 60  1  0  0  0  0
 60 61  2  0  0  0  0
 61 62  1  0  0  0  0
 61 63  1  0  0  0  0
M  END
29
 

 68 72  0  0  0  0  0  0  0  0999 V2000
   -2.6378    1.5230    0.0000 C   0  0  0  0  0  0  0  0  0  0  0  0
   -3.9566    0.7615    0.0000 C   0  0  0  0  0  0  0  0  0  0  0  0
   -3.9566   -0.7615    0.0000 C   0  0  0  0  0  0  0  0  0  0  0  0
   -2.6378   -1.5230    0.0000 C   0  0  0  0  0  0  0  0  0  0  0  0
   -1.3189    3.8076    0.0000 C   0  0  0  0  0  0  0  0  0  0  0  0
   -2.6378    3.0461    0.0000 C   0  0  0  0  0  0  0  0  0  0  0  0
    0.0001    3.0461    0.0000 C   0  0  0  0  0  0  0  0  0  0  0  0
    1.3189    3.8076    0.0000 C   0  0  0  0  0  0  0  0  0  0  0  0
    2.6378    1.5230    0.0000 C   0  0  0  0  0  0  0  0  0  0  0  0
    2.6378    3.0461    0.0000 C   0  0  0  0  0  0  0  0  0  0  0  0
    2.6378   -1.5230    0.0000 C   0  0  0  0  0  0  0  0  0  0  0  0
    3.9568   -0.7615    0.0000 C   0  0  3  0  0  0  0  0  0  0  0  0
    3.9568    0.7615    0.0000 C   0  0  0  0  0  0  0  0  0  0  0  0
    0.0001   -3.0459    0.0000 C   0  0  0  0  0  0  0  0  0  0  0  0
    1.3189   -3.8074    0.0000 C   0  0  0  0  0  0  0  0  0  0  0  0
    2.6378   -3.0459    0.0000 C   0  0  0  0  0  0  0  0  0  0  0  0
   -2.6378   -3.0459    0.0000 C   0  0  0  0  0  0  0  0  0  0  0  0
   -1.3189   -3.8074    0.0000 C   0  0  0  0  0  0  0  0  0  0  0  0
    5.2756   -1.5230    0.0000 C   0  0  0  0  0  0  0  0  0  0  0  0
    5.2756   -3.0459    0.0000 C   0  0  0  0  0  0  0  0  0  0  0  0
   -5.2756    1.5230    0.0000 C   0  0  0  0  0  0  0  0  0  0  0  0
   -5.2756    3.0461    0.0000 C   0  0  0  0  0  0  0  0  0  0  0  0
   -5.2756    6.0920    0.0000 C   0  0  0  0  0  0  0  0  0  0  0  0
   -6.5946    5.3305    0.0000 C   0  0  0  0  0  0  0  0  0  0  0  0
   -6.5946    3.8076    0.0000 C   0  0  0  0  0  0  0  0  0  0  0  0
   -3.9566    8.3764    0.0000 C   0  0  0  0  0  0  0  0  0  0  0  0
   -5.2756    7.6150    0.0000 C   0  0  0  0  0  0  0  0  0  0  0  0
   -2.6378    7.6150    0.0000 C   0  0  0  0  0  0  0  0  0  0  0  0
   -1.3189    8.3764    0.0000 C   0  0  0  0  0  0  0  0  0  0  0  0
    0.0001    7.6150    0.0000 C   0  0  0  0  0  0  0  0  0  0  0  0
    1.3189    8.3764    0.0000 C   0  0  0  0  0  0  0  0  0  0  0  0
    2.6378    7.6150    0.0000 C   0  0  0  0  0  0  0  0  0  0  0  0
    3.9568    8.3764    0.0000 C   0  0  0  0  0  0  0  0  0  0  0  0
    5.2756    6.0920    0.0000 C   0  0  0  0  0  0  0  0  0  0  0  0
    5.2756    7.6150    0.0000 C   0  0  0  0  0  0  0  0  0  0  0  0
    6.5946    3.8076    0.0000 C   0  0  0  0  0  0  0  0  0  0  0  0
    6.5946    5.3305    0.0000 C   0  0  0  0  0  0  0  0  0  0  0  0
    7.9135    1.5230    0.0000 C   0  0  0  0  0  0  0  0  0  0  0  0
    7.9135    3.0461    0.0000 C   0  0  0  0  0  0  0  0  0  0  0  0
    7.9135   -1.5230    0.0000 C   0  0  0  0  0  0  0  0  0  0  0  0
    9.2323   -0.7615    0.0000 C   0  0  0  0  0  0  0  0  0  0  0  0
    9.2323    0.7615    0.0000 C   0  0  0  0  0  0  0  0  0  0  0  0
    6.5946   -3.8074    0.0000 C   0  0  0  0  0  0  0  0  0  0  0  0
    7.9135   -3.0459    0.0000 C   0  0  0  0  0  0  0  0  0  0  0  0
    5.2756   -6.0920    0.0000 C   0  0  0  0  0  0  0  0  0  0  0  0
    6.5946   -5.3303    0.0000 C   0  0  0  0  0  0  0  0  0  0  0  0
    2.6378   -7.6150    0.0000 C   0  0  0  0  0  0  0  0  0  0  0  0
    3.9568   -8.3764    0.0000 C   0  0  0  0  0  0  0  0  0  0  0  0
    5.2756   -7.6150    0.0000 C   0  0  0  0  0  0  0  0  0  0  0  0
    0.0001   -7.6150    0.0000 C   0  0  0  0  0  0  0  0  0  0  0  0
    1.3189   -8.3764    0.0000 C   0  0  0  0  0  0  0  0  0  0  0  0
   -2.6378   -7.6150    0.0000 C   0  0  0  0  0  0  0  0  0  0  0  0
   -1.3189   -8.3764    0.0000 C   0  0  0  0  0  0  0  0  0  0  0  0
   -5.2756   -6.0920    0.0000 C   0  0  0  0  0  0  0  0  0  0  0  0
   -5.2756   -7.6150    0.0000 C   0  0  0  0  0  0  0  0  0  0  0  0
   -3.9566   -8.3764    0.0000 C   0  0  0  0  0  0  0  0  0  0  0  0
   -6.5946   -3.8074    0.0000 C   0  0  0  0  0  0  0  0  0  0  0  0
   -6.5946   -5.3303    0.0000 C   0  0  0  0  0  0  0  0  0  0  0  0
   -7.9134   -3.0459    0.0000 C   0  0  0  0  0  0  0  0  0  0  0  0
   -7.9134   -1.5230    0.0000 C   0  0  0  0  0  0  0  0  0  0  0  0
   -9.2323   -0.7615    0.0000 C   0  0  0  0  0  0  0  0  0  0  0  0
   -9.2323    0.7615    0.0000 C   0  0  0  0  0  0  0  0  0  0  0  0
   -7.9134    1.5230    0.0000 C   0  0  0  0  0  0  0  0  0  0  0  0
   -7.9134    3.0461    0.0000 C   0  0  0  0  0  0  0  0  0  0  0  0
    1.3189    5.3305    0.0000 C   0  0  0  0  0  0  0  0  0  0  0  0
    2.6378    6.0920    0.0000 C   0  0  0  0  0  0  0  0  0  0  0  0
   -1.3189   -5.3303    0.0000 C   0  0  0  0  0  0  0  0  0  0  0  0
   -2.6378   -6.0918    0.0000 C   0  0  0  0  0  0  0  0  0  0  0  0
  1  2  2  0  0  0  0
  1  6  1  0  0  0  0
  2  3  1  0  0  0  0
  2 21  1  0  0  0  0
  3  4  2  0  0  0  0
  4 17  1  0  0  0  0
  5  6  2  0  0  0  0
  5  7  1  0  0  0  0
  7  8  2  0  0  0  0
  8 10  1  0  0  0  0
  8 65  1  0  0  0  0
  9 10  2  0  0  0  0
  9 13  1  0  0  0  0
 11 12  1  0  0  0  0
 11 16  2  0  0  0  0
 12 13  1  0  0  0  0
 12 19  1  0  0  0  0
 14 15  2  0  0  0  0
 14 18  1  0  0  0  0
 15 16  1  0  0  0  0
 17 18  2  0  0  0  0
 18 67  1  0  0  0  0
 19 20  1  0  0  0  0
 20 43  1  0  0  0  0
 21 22  1  0  0  0  0
 22 25  1  0  0  0  0
 23 24  2  0  0  0  0
 23 27  1  0  0  0  0
 24 25  1  0  0  0  0
 25 64  2  0  0  0  0
 26 27  2  0  0  0  0
 26 28  1  0  0  0  0
 28 29  2  0  0  0  0
 29 30  1  0  0  0  0
 30 31  2  0  0  0  0
 31 32  1  0  0  0  0
 32 33  2  0  0  0  0
 32 66  1  0  0  0  0
 33 35  1  0  0  0  0
 34 35  2  0  0  0  0
 34 37  1  0  0  0  0
 36 37  2  0  0  0  0
 36 39  1  0  0  0  0
 38 39  2  0  0  0  0
 38 42  1  0  0  0  0
 40 41  1  0  0  0  0
 40 44  2  0  0  0  0
 41 42  2  0  0  0  0
 43 44  1  0  0  0  0
 43 46  2  0  0  0  0
 45 46  1  0  0  0  0
 45 49  2  0  0  0  0
 47 48  2  0  0  0  0
 47 51  1  0  0  0  0
 48 49  1  0  0  0  0
 50 51  2  0  0  0  0
 50 53  1  0  0  0  0
 52 53  2  0  0  0  0
 52 56  1  0  0  0  0
 52 68  1  0  0  0  0
 54 55  1  0  0  0  0
 54 58  2  0  0  0  0
 55 56  2  0  0  0  0
 57 58  1  0  0  0  0
 57 59  2  0  0  0  0
 59 60  1  0  0  0  0
 60 61  1  0  0  0  0
 61 62  1  0  0  0  0
 62 63  1  0  0  0  0
 63 64  1  0  0  0  0
 65 66  1  0  0  0  0
 67 68  1  0  0  0  0
M  END
30
 

 22 24  0  0  0  0  0  0  0  0999 V2000
   -1.5321   10.3479    0.0000 C   0  0  0  0  0  0  0  0  0  0  0  0
   -2.2466    9.9354    0.0000 C   0  0  0  0  0  0  0  0  0  0  0  0
   -2.2466    9.1103    0.0000 C   0  0  0  0  0  0  0  0  0  0  0  0
   -1.5321    8.6978    0.0000 C   0  0  0  0  0  0  0  0  0  0  0  0
   -0.8177    9.1103    0.0000 C   0  0  0  0  0  0  0  0  0  0  0  0
   -0.8177    9.9354    0.0000 C   0  0  0  0  0  0  0  0  0  0  0  0
   -0.4803    8.5093    0.0000 C   0  0  0  0  0  0  0  0  0  0  0  0
   -0.8928    7.7948    0.0000 C   0  0  0  0  0  0  0  0  0  0  0  0
   -0.4803    7.0803    0.0000 C   0  0  0  0  0  0  0  0  0  0  0  0
    0.3447    7.0803    0.0000 C   0  0  0  0  0  0  0  0  0  0  0  0
    0.7572    7.7948    0.0000 C   0  0  0  0  0  0  0  0  0  0  0  0
    0.3447    8.5093    0.0000 C   0  0  0  0  0  0  0  0  0  0  0  0
   -1.7178    7.7948    0.0000 C   0  0  0  0  0  0  0  0  0  0  0  0
   -2.1303    8.5093    0.0000 C   0  0  0  0  0  0  0  0  0  0  0  0
   -2.9553    8.5093    0.0000 N   0  0  0  0  0  0  0  0  0  0  0  0
   -3.3678    9.2237    0.0000 C   0  0  0  0  0  0  0  0  0  0  0  0
   -2.9553    9.9382    0.0000 C   0  0  0  0  0  0  0  0  0  0  0  0
   -3.3678    7.7948    0.0000 C   0  0  0  0  0  0  0  0  0  0  0  0
   -0.1032   10.3479    0.0000 O   0  0  0  0  0  0  0  0  0  0  0  0
   -0.1032   11.1729    0.0000 C   0  0  0  0  0  0  0  0  0  0  0  0
    0.7572    6.3658    0.0000 O   0  0  0  0  0  0  0  0  0  0  0  0
    1.5822    6.3658    0.0000 C   0  0  0  0  0  0  0  0  0  0  0  0
  1  2  2  0  0  0  0
  1  6  1  0  0  0  0
  2  3  1  0  0  0  0
  3  4  2  0  0  0  0
  4  5  1  0  0  0  0
  5  6  2  0  0  0  0
  5  7  1  0  0  0  0
  6 19  1  0  0  0  0
  7  8  2  0  0  0  0
  7 12  1  0  0  0  0
  8  9  1  0  0  0  0
  8 13  1  0  0  0  0
  9 10  2  0  0  0  0
 10 11  1  0  0  0  0
 10 21  1  0  0  0  0
 11 12  2  0  0  0  0
 13 14  1  0  0  0  0
 14 15  1  0  0  0  0
 15 16  1  0  0  0  0
 15 18  1  0  0  0  0
 16 17  1  0  0  0  0
 17  2  1  0  0  0  0
 19 20  1  0  0  0  0
 21 22  1  0  0  0  0
M  END
31
 

 41 47  0  0  0  0  0  0  0  0999 V2000
   -2.3218    7.2520    0.0000 C   0  0  0  0  0  0  0  0  0  0  0  0
   -3.1468    7.2520    0.0000 C   0  0  0  0  0  0  0  0  0  0  0  0
   -3.5593    6.5375    0.0000 C   0  0  0  0  0  0  0  0  0  0  0  0
   -3.1468    5.8230    0.0000 N   0  0  3  0  0  0  0  0  0  0  0  0
   -2.3218    5.8230    0.0000 C   0  0  3  0  0  0  0  0  0  0  0  0
   -1.9093    6.5375    0.0000 C   0  0  3  0  0  0  0  0  0  0  0  0
   -1.7698    5.2099    0.0000 C   0  0  0  0  0  0  0  0  0  0  0  0
   -1.0161    5.5455    0.0000 C   0  0  0  0  0  0  0  0  0  0  0  0
   -1.1023    6.3659    0.0000 C   0  0  0  0  0  0  0  0  0  0  0  0
   -0.4349    6.8509    0.0000 C   0  0  0  0  0  0  0  0  0  0  0  0
    0.3188    6.5153    0.0000 C   0  0  0  0  0  0  0  0  0  0  0  0
    0.4050    5.6949    0.0000 C   0  0  0  0  0  0  0  0  0  0  0  0
   -0.2624    5.2099    0.0000 C   0  0  0  0  0  0  0  0  0  0  0  0
   -3.5593    7.9664    0.0000 C   0  0  0  0  0  0  0  0  0  0  0  0
   -3.5593    5.1085    0.0000 C   0  0  0  0  0  0  0  0  0  0  0  0
   -4.3843    7.9664    0.0000 C   0  0  0  0  0  0  0  0  0  0  0  0
   -4.3843    5.1085    0.0000 C   0  0  0  0  0  0  0  0  0  0  0  0
   -4.8086    7.3543    0.0000 C   0  0  0  0  0  0  0  0  0  0  0  0
   -5.5230    6.9418    0.0000 C   0  0  0  0  0  0  0  0  0  0  0  0
   -5.5230    6.1168    0.0000 C   0  0  0  0  0  0  0  0  0  0  0  0
   -4.8086    5.7043    0.0000 C   0  0  0  0  0  0  0  0  0  0  0  0
   -4.0941    6.1168    0.0000 C   0  0  0  0  0  0  0  0  0  0  0  0
   -4.0941    6.9418    0.0000 C   0  0  0  0  0  0  0  0  0  0  0  0
   -6.2375    7.3543    0.0000 O   0  0  0  0  0  0  0  0  0  0  0  0
   -6.9520    6.9418    0.0000 C   0  0  0  0  0  0  0  0  0  0  0  0
   -0.5211    7.6714    0.0000 O   0  0  0  0  0  0  0  0  0  0  0  0
    0.0622    8.2547    0.0000 C   0  0  0  0  0  0  0  0  0  0  0  0
   -4.7968    8.6809    0.0000 C   0  0  0  0  0  0  0  0  0  0  0  0
   -4.3843    9.3954    0.0000 C   0  0  0  0  0  0  0  0  0  0  0  0
   -3.5593    9.3954    0.0000 C   0  0  0  0  0  0  0  0  0  0  0  0
   -3.1468    8.6809    0.0000 C   0  0  0  0  0  0  0  0  0  0  0  0
   -1.8230    7.3580    0.0000 C   0  0  0  0  0  0  0  0  0  0  0  0
   -1.0693    7.6935    0.0000 C   0  0  0  0  0  0  0  0  0  0  0  0
   -0.9831    8.5140    0.0000 C   0  0  0  0  0  0  0  0  0  0  0  0
   -1.6505    8.9990    0.0000 C   0  0  0  0  0  0  0  0  0  0  0  0
   -2.4042    8.6634    0.0000 C   0  0  0  0  0  0  0  0  0  0  0  0
   -2.4904    7.8429    0.0000 C   0  0  0  0  0  0  0  0  0  0  0  0
   -0.2294    8.8495    0.0000 O   0  0  0  0  0  0  0  0  0  0  0  0
   -0.1431    9.6700    0.0000 C   0  0  0  0  0  0  0  0  0  0  0  0
   -3.1468   10.1099    0.0000 O   0  0  0  0  0  0  0  0  0  0  0  0
   -2.3218   10.1099    0.0000 C   0  0  0  0  0  0  0  0  0  0  0  0
  1  2  2  0  0  0  0
  1  6  1  0  0  0  0
  2  3  1  0  0  0  0
  2 14  1  0  0  0  0
  3  4  1  0  0  0  0
  4  5  1  0  0  0  0
  4 15  1  0  0  0  0
  5  6  1  0  0  0  0
  5  7  1  0  0  0  0
  6  9  1  0  0  0  0
  6 32  1  0  0  0  0
  7  8  1  0  0  0  0
  8 13  2  0  0  0  0
  8  9  1  0  0  0  0
  9 10  2  0  0  0  0
 10 11  1  0  0  0  0
 10 26  1  0  0  0  0
 11 12  2  0  0  0  0
 12 13  1  0  0  0  0
 14 31  2  0  0  0  0
 14 16  1  0  0  0  0
 15 17  1  0  0  0  0
 16 18  1  0  0  0  0
 16 28  2  0  0  0  0
 18 19  2  0  0  0  0
 18 23  1  0  0  0  0
 19 20  1  0  0  0  0
 19 24  1  0  0  0  0
 20 21  2  0  0  0  0
 21 22  1  0  0  0  0
 21 17  1  0  0  0  0
 22 23  2  0  0  0  0
 24 25  1  0  0  0  0
 26 27  1  0  0  0  0
 28 29  1  0  0  0  0
 29 30  2  0  0  0  0
 30 31  1  0  0  0  0
 30 40  1  0  0  0  0
 32 33  2  0  0  0  0
 32 37  1  0  0  0  0
 33 34  1  0  0  0  0
 34 35  2  0  0  0  0
 34 38  1  0  0  0  0
 35 36  1  0  0  0  0
 36 37  2  0  0  0  0
 38 39  1  0  0  0  0
 40 41  1  0  0  0  0
M  END
32
 

 32 37  0  0  0  0  0  0  0  0999 V2000
   -0.9139    1.0225    0.0000 C   0  0  0  0  0  0  0  0  0  0  0  0
   -0.9139    1.8474    0.0000 C   0  0  0  0  0  0  0  0  0  0  0  0
   -1.6284    2.2600    0.0000 C   0  0  0  0  0  0  0  0  0  0  0  0
   -2.3429    1.8475    0.0000 C   0  0  0  0  0  0  0  0  0  0  0  0
   -2.3429    1.0225    0.0000 C   0  0  0  0  0  0  0  0  0  0  0  0
   -1.6284    0.6100    0.0000 C   0  0  0  0  0  0  0  0  0  0  0  0
   -1.6284   -0.2149    0.0000 C   0  0  0  0  0  0  0  0  0  0  0  0
   -0.9139   -0.6275    0.0000 C   0  0  0  0  0  0  0  0  0  0  0  0
   -0.1995   -0.2150    0.0000 C   0  0  0  0  0  0  0  0  0  0  0  0
   -0.1996    0.6101    0.0000 C   0  0  0  0  0  0  0  0  0  0  0  0
   -1.6283    3.0850    0.0000 C   0  0  0  0  0  0  0  0  0  0  0  0
   -0.9139    3.4975    0.0000 C   0  0  0  0  0  0  0  0  0  0  0  0
   -0.1995    3.0849    0.0000 C   0  0  0  0  0  0  0  0  0  0  0  0
   -0.1995    2.2599    0.0000 C   0  0  0  0  0  0  0  0  0  0  0  0
    0.3129   -1.1525    0.0000 C   0  0  0  0  0  0  0  0  0  0  0  0
   -0.2319   -1.7719    0.0000 C   0  0  0  0  0  0  0  0  0  0  0  0
    0.0320   -2.5536    0.0000 C   0  0  0  0  0  0  0  0  0  0  0  0
    0.8408   -2.7158    0.0000 C   0  0  0  0  0  0  0  0  0  0  0  0
    1.3858   -2.0964    0.0000 C   0  0  0  0  0  0  0  0  0  0  0  0
    1.1218   -1.3148    0.0000 C   0  0  0  0  0  0  0  0  0  0  0  0
    0.4840    2.2599    0.0000 O   0  0  0  0  0  0  0  0  0  0  0  0
    0.9280    1.5740    0.0000 C   0  0  0  0  0  0  0  0  0  0  0  0
    0.5929    0.8202    0.0000 C   0  0  0  0  0  0  0  0  0  0  0  0
    1.0782    0.1531    0.0000 C   0  0  0  0  0  0  0  0  0  0  0  0
    1.8986    0.2397    0.0000 C   0  0  0  0  0  0  0  0  0  0  0  0
    2.2337    0.9936    0.0000 C   0  0  0  0  0  0  0  0  0  0  0  0
    1.7484    1.6607    0.0000 C   0  0  0  0  0  0  0  0  0  0  0  0
    2.3429   -0.4837    0.0000 C   0  0  0  0  0  0  0  0  0  0  0  0
   -0.9139   -1.4525    0.0000 O   0  0  0  0  0  0  0  0  0  0  0  0
    1.1047   -3.4975    0.0000 O   0  0  0  0  0  0  0  0  0  0  0  0
    0.5150    3.4974    0.0000 O   0  0  0  0  0  0  0  0  0  0  0  0
    1.9500   -1.2091    0.0000 C   0  0  0  0  0  0  0  0  0  0  0  0
  1  2  1  0  0  0  0
  1  6  2  0  0  0  0
  1 10  1  0  0  0  0
  2  3  2  0  0  0  0
  2 14  1  0  0  0  0
  3  4  1  0  0  0  0
  3 11  1  0  0  0  0
  4  5  1  0  0  0  0
  5  6  1  0  0  0  0
  6  7  1  0  0  0  0
  7  8  2  0  0  0  0
  8  9  1  0  0  0  0
  8 29  1  0  0  0  0
  9 10  2  0  0  0  0
  9 15  1  0  0  0  0
 11 12  2  0  0  0  0
 12 13  1  0  0  0  0
 13 14  2  0  0  0  0
 13 31  1  0  0  0  0
 14 21  1  0  0  0  0
 15 16  2  0  0  0  0
 15 20  1  0  0  0  0
 16 17  1  0  0  0  0
 17 18  2  0  0  0  0
 18 19  1  0  0  0  0
 18 30  1  0  0  0  0
 19 20  2  0  0  0  0
 20 32  1  0  0  0  0
 22 27  2  0  0  0  0
 22 21  1  0  0  0  0
 22 23  1  0  0  0  0
 23 24  2  0  0  0  0
 24 25  1  0  0  0  0
 25 26  2  0  0  0  0
 26 27  1  0  0  0  0
 28 25  1  0  0  0  0
 28 32  1  0  0  0  0
M  END
33
 

 38 46  0  0  0  0  0  0  0  0999 V2000
   -2.2828    4.6141    0.0000 C   0  0  0  0  0  0  0  0  0  0  0  0
   -2.2828    5.4391    0.0000 C   0  0  0  0  0  0  0  0  0  0  0  0
   -2.9973    5.8516    0.0000 C   0  0  0  0  0  0  0  0  0  0  0  0
   -3.7117    5.4391    0.0000 C   0  0  0  0  0  0  0  0  0  0  0  0
   -3.7117    4.6141    0.0000 C   0  0  0  0  0  0  0  0  0  0  0  0
   -2.9972    4.2016    0.0000 C   0  0  0  0  0  0  0  0  0  0  0  0
   -2.9972    3.3766    0.0000 C   0  0  0  0  0  0  0  0  0  0  0  0
   -2.2827    2.9641    0.0000 C   0  0  0  0  0  0  0  0  0  0  0  0
   -1.5683    3.3766    0.0000 C   0  0  0  0  0  0  0  0  0  0  0  0
   -1.5683    4.2016    0.0000 C   0  0  0  0  0  0  0  0  0  0  0  0
   -4.4262    4.2017    0.0000 C   0  0  0  0  0  0  0  0  0  0  0  0
   -4.4262    3.3766    0.0000 C   0  0  0  0  0  0  0  0  0  0  0  0
   -3.7117    2.9641    0.0000 C   0  0  0  0  0  0  0  0  0  0  0  0
   -3.7117    2.1391    0.0000 C   0  0  0  0  0  0  0  0  0  0  0  0
   -2.9972    1.7266    0.0000 C   0  0  0  0  0  0  0  0  0  0  0  0
   -2.2828    2.1391    0.0000 C   0  0  0  0  0  0  0  0  0  0  0  0
    0.8323    4.6200    0.0000 C   0  0  0  0  0  0  0  0  0  0  0  0
    0.8323    5.4450    0.0000 C   0  0  0  0  0  0  0  0  0  0  0  0
    0.1178    5.8575    0.0000 C   0  0  0  0  0  0  0  0  0  0  0  0
   -0.5966    5.4450    0.0000 C   0  0  0  0  0  0  0  0  0  0  0  0
   -0.5966    4.6200    0.0000 C   0  0  0  0  0  0  0  0  0  0  0  0
    0.1179    4.2075    0.0000 C   0  0  0  0  0  0  0  0  0  0  0  0
    0.1178    3.3825    0.0000 C   0  0  0  0  0  0  0  0  0  0  0  0
    0.8324    2.9700    0.0000 C   0  0  0  0  0  0  0  0  0  0  0  0
    1.5468    3.3825    0.0000 C   0  0  0  0  0  0  0  0  0  0  0  0
    1.5468    4.2075    0.0000 C   0  0  0  0  0  0  0  0  0  0  0  0
   -1.3111    4.2075    0.0000 C   0  0  0  0  0  0  0  0  0  0  0  0
   -1.3111    3.3825    0.0000 C   0  0  0  0  0  0  0  0  0  0  0  0
   -0.5966    2.9700    0.0000 C   0  0  0  0  0  0  0  0  0  0  0  0
   -0.5966    2.1450    0.0000 C   0  0  0  0  0  0  0  0  0  0  0  0
    0.1179    1.7325    0.0000 C   0  0  0  0  0  0  0  0  0  0  0  0
    0.8323    2.1450    0.0000 C   0  0  0  0  0  0  0  0  0  0  0  0
   -2.2828    6.2641    0.0000 C   0  0  0  0  0  0  0  0  0  0  0  0
   -0.5966    6.2700    0.0000 C   0  0  0  0  0  0  0  0  0  0  0  0
   -2.2828    1.3141    0.0000 C   0  0  0  0  0  0  0  0  0  0  0  0
   -0.5966    1.3200    0.0000 C   0  0  0  0  0  0  0  0  0  0  0  0
   -1.4623    1.6926    0.0000 C   0  0  0  0  0  0  0  0  0  0  0  0
   -1.4505    5.8516    0.0000 C   0  0  0  0  0  0  0  0  0  0  0  0
  1  2  1  0  0  0  0
  1  6  1  0  0  0  0
  1 10  2  0  0  0  0
  2  3  2  0  0  0  0
  3  4  1  0  0  0  0
  3 33  1  0  0  0  0
  4  5  2  0  0  0  0
  5  6  1  0  0  0  0
  5 11  1  0  0  0  0
  6  7  2  0  0  0  0
  7  8  1  0  0  0  0
  7 13  1  0  0  0  0
  8  9  2  0  0  0  0
  9 10  1  0  0  0  0
 11 12  2  0  0  0  0
 12 13  1  0  0  0  0
 13 14  2  0  0  0  0
 14 15  1  0  0  0  0
 15 16  2  0  0  0  0
 15 35  1  0  0  0  0
 16  8  1  0  0  0  0
 17 18  1  0  0  0  0
 17 22  1  0  0  0  0
 17 26  2  0  0  0  0
 18 19  2  0  0  0  0
 19 20  1  0  0  0  0
 19 34  1  0  0  0  0
 20 21  2  0  0  0  0
 21 22  1  0  0  0  0
 21 27  1  0  0  0  0
 22 23  2  0  0  0  0
 23 24  1  0  0  0  0
 23 29  1  0  0  0  0
 24 25  2  0  0  0  0
 25 26  1  0  0  0  0
 27 28  2  0  0  0  0
 28 29  1  0  0  0  0
 29 30  2  0  0  0  0
 30 31  1  0  0  0  0
 31 32  2  0  0  0  0
 31 36  1  0  0  0  0
 32 24  1  0  0  0  0
 33 38  1  0  0  0  0
 35 37  1  0  0  0  0
 36 37  1  0  0  0  0
 38 34  1  0  0  0  0
M  END
34
 

 36 44  0  0  0  0  0  0  0  0999 V2000
   -2.2828    4.6141    0.0000 C   0  0  0  0  0  0  0  0  0  0  0  0
   -2.2828    5.4391    0.0000 C   0  0  0  0  0  0  0  0  0  0  0  0
   -2.9973    5.8516    0.0000 C   0  0  0  0  0  0  0  0  0  0  0  0
   -3.7117    5.4391    0.0000 C   0  0  0  0  0  0  0  0  0  0  0  0
   -3.7117    4.6141    0.0000 C   0  0  0  0  0  0  0  0  0  0  0  0
   -2.9972    4.2016    0.0000 C   0  0  0  0  0  0  0  0  0  0  0  0
   -2.9972    3.3766    0.0000 C   0  0  0  0  0  0  0  0  0  0  0  0
   -2.2827    2.9641    0.0000 C   0  0  0  0  0  0  0  0  0  0  0  0
   -1.5683    3.3766    0.0000 C   0  0  0  0  0  0  0  0  0  0  0  0
   -1.5683    4.2016    0.0000 C   0  0  0  0  0  0  0  0  0  0  0  0
   -4.4262    4.2017    0.0000 C   0  0  0  0  0  0  0  0  0  0  0  0
   -4.4262    3.3766    0.0000 C   0  0  0  0  0  0  0  0  0  0  0  0
   -3.7117    2.9641    0.0000 C   0  0  0  0  0  0  0  0  0  0  0  0
   -3.7117    2.1391    0.0000 C   0  0  0  0  0  0  0  0  0  0  0  0
   -2.9972    1.7266    0.0000 C   0  0  0  0  0  0  0  0  0  0  0  0
   -2.2828    2.1391    0.0000 C   0  0  0  0  0  0  0  0  0  0  0  0
    0.8323    4.6200    0.0000 C   0  0  0  0  0  0  0  0  0  0  0  0
    0.8323    5.4450    0.0000 C   0  0  0  0  0  0  0  0  0  0  0  0
    0.1178    5.8575    0.0000 C   0  0  0  0  0  0  0  0  0  0  0  0
   -0.5966    5.4450    0.0000 C   0  0  0  0  0  0  0  0  0  0  0  0
   -0.5966    4.6200    0.0000 C   0  0  0  0  0  0  0  0  0  0  0  0
    0.1179    4.2075    0.0000 C   0  0  0  0  0  0  0  0  0  0  0  0
    0.1178    3.3825    0.0000 C   0  0  0  0  0  0  0  0  0  0  0  0
    0.8324    2.9700    0.0000 C   0  0  0  0  0  0  0  0  0  0  0  0
    1.5468    3.3825    0.0000 C   0  0  0  0  0  0  0  0  0  0  0  0
    1.5468    4.2075    0.0000 C   0  0  0  0  0  0  0  0  0  0  0  0
   -1.3111    4.2075    0.0000 C   0  0  0  0  0  0  0  0  0  0  0  0
   -1.3111    3.3825    0.0000 C   0  0  0  0  0  0  0  0  0  0  0  0
   -0.5966    2.9700    0.0000 C   0  0  0  0  0  0  0  0  0  0  0  0
   -0.5966    2.1450    0.0000 C   0  0  0  0  0  0  0  0  0  0  0  0
    0.1179    1.7325    0.0000 C   0  0  0  0  0  0  0  0  0  0  0  0
    0.8323    2.1450    0.0000 C   0  0  0  0  0  0  0  0  0  0  0  0
   -1.9999    6.3820    0.0000 C   0  0  0  0  0  0  0  0  0  0  0  0
   -0.9031    6.3879    0.0000 C   0  0  0  0  0  0  0  0  0  0  0  0
   -1.9999    1.1962    0.0000 C   0  0  0  0  0  0  0  0  0  0  0  0
   -0.9030    1.2021    0.0000 C   0  0  0  0  0  0  0  0  0  0  0  0
  1  2  1  0  0  0  0
  1  6  1  0  0  0  0
  1 10  2  0  0  0  0
  2  3  2  0  0  0  0
  3  4  1  0  0  0  0
  3 33  1  0  0  0  0
  4  5  2  0  0  0  0
  5  6  1  0  0  0  0
  5 11  1  0  0  0  0
  6  7  2  0  0  0  0
  7  8  1  0  0  0  0
  7 13  1  0  0  0  0
  8  9  2  0  0  0  0
  9 10  1  0  0  0  0
 11 12  2  0  0  0  0
 12 13  1  0  0  0  0
 13 14  2  0  0  0  0
 14 15  1  0  0  0  0
 15 16  2  0  0  0  0
 15 35  1  0  0  0  0
 16  8  1  0  0  0  0
 17 18  1  0  0  0  0
 17 22  1  0  0  0  0
 17 26  2  0  0  0  0
 18 19  2  0  0  0  0
 19 20  1  0  0  0  0
 19 34  1  0  0  0  0
 20 21  2  0  0  0  0
 21 22  1  0  0  0  0
 21 27  1  0  0  0  0
 22 23  2  0  0  0  0
 23 24  1  0  0  0  0
 23 29  1  0  0  0  0
 24 25  2  0  0  0  0
 25 26  1  0  0  0  0
 27 28  2  0  0  0  0
 28 29  1  0  0  0  0
 29 30  2  0  0  0  0
 30 31  1  0  0  0  0
 31 32  2  0  0  0  0
 31 36  1  0  0  0  0
 32 24  1  0  0  0  0
 33 34  1  0  0  0  0
 35 36  1  0  0  0  0
M  END
35
 

 47 51  0  0  0  0  0  0  0  0999 V2000
   -2.0153    1.8223    0.0000 C   0  0  3  0  0  0  0  0  0  0  0  0
   -2.8403    1.8223    0.0000 C   0  0  0  0  0  0  0  0  0  0  0  0
   -3.2529    1.1078    0.0000 C   0  0  3  0  0  0  0  0  0  0  0  0
   -2.8404    0.3934    0.0000 C   0  0  0  0  0  0  0  0  0  0  0  0
   -2.0154    0.3934    0.0000 C   0  0  0  0  0  0  0  0  0  0  0  0
   -1.6029    1.1079    0.0000 C   0  0  0  0  0  0  0  0  0  0  0  0
    1.1314    1.1550    0.0000 C   0  0  0  0  0  0  0  0  0  0  0  0
    0.7189    1.8695    0.0000 C   0  0  0  0  0  0  0  0  0  0  0  0
   -0.1061    1.8695    0.0000 C   0  0  0  0  0  0  0  0  0  0  0  0
   -0.5186    1.1550    0.0000 C   0  0  0  0  0  0  0  0  0  0  0  0
   -0.1061    0.4405    0.0000 C   0  0  0  0  0  0  0  0  0  0  0  0
    0.7189    0.4405    0.0000 C   0  0  0  0  0  0  0  0  0  0  0  0
   -1.0843    2.3482    0.0000 C   0  0  0  0  0  0  0  0  0  0  0  0
   -1.0371   -0.0618    0.0000 C   0  0  3  0  0  0  0  0  0  0  0  0
   -0.8250    1.4143    0.0000 O   0  0  0  0  0  0  0  0  0  0  0  0
   -1.2729    0.8957    0.0000 O   0  0  0  0  0  0  0  0  0  0  0  0
    1.1314    2.5839    0.0000 O   0  0  0  0  0  0  0  0  0  0  0  0
    1.1314   -0.2739    0.0000 O   0  0  0  0  0  0  0  0  0  0  0  0
    1.9564    1.1550    0.0000 C   0  0  0  0  0  0  0  0  0  0  0  0
    2.3689    0.4405    0.0000 C   0  0  0  0  0  0  0  0  0  0  0  0
    2.3689    1.8695    0.0000 O   0  0  0  0  0  0  0  0  0  0  0  0
    3.1939    0.4405    0.0000 C   0  0  0  0  0  0  0  0  0  0  0  0
    3.6064   -0.2739    0.0000 C   0  0  0  0  0  0  0  0  0  0  0  0
   -4.0779    1.1079    0.0000 C   0  0  0  0  0  0  0  0  0  0  0  0
   -4.4904    0.3934    0.0000 C   0  0  0  0  0  0  0  0  0  0  0  0
   -5.3154    0.3934    0.0000 C   0  0  0  0  0  0  0  0  0  0  0  0
   -4.4904    1.8223    0.0000 O   0  0  0  0  0  0  0  0  0  0  0  0
   -5.7279   -0.3211    0.0000 C   0  0  0  0  0  0  0  0  0  0  0  0
   -3.2529    2.5368    0.0000 O   0  0  0  0  0  0  0  0  0  0  0  0
   -2.4279    1.1078    0.0000 C   0  0  0  0  0  0  0  0  0  0  0  0
   -1.0448   -0.9102    0.0000 C   0  0  0  0  0  0  0  0  0  0  0  0
   -1.7629   -1.3163    0.0000 C   0  0  0  0  0  0  0  0  0  0  0  0
   -1.7703   -2.1413    0.0000 C   0  0  0  0  0  0  0  0  0  0  0  0
   -1.0596   -2.5602    0.0000 C   0  0  0  0  0  0  0  0  0  0  0  0
   -0.3414   -2.1541    0.0000 C   0  0  0  0  0  0  0  0  0  0  0  0
   -0.3340   -1.3291    0.0000 C   0  0  0  0  0  0  0  0  0  0  0  0
    0.3841   -0.9231    0.0000 O   0  0  0  0  0  0  0  0  0  0  0  0
   -2.5672   -1.9278    0.0000 C   0  0  0  0  0  0  0  0  0  0  0  0
   -1.9838   -2.9382    0.0000 C   0  0  0  0  0  0  0  0  0  0  0  0
   -2.4736   -0.8974    0.0000 O   0  0  0  0  0  0  0  0  0  0  0  0
   -1.0670   -3.3852    0.0000 O   0  0  0  0  0  0  0  0  0  0  0  0
    0.3693   -2.5730    0.0000 C   0  0  0  0  0  0  0  0  0  0  0  0
    1.0875   -2.1669    0.0000 C   0  0  0  0  0  0  0  0  0  0  0  0
    1.7982   -2.5858    0.0000 C   0  0  0  0  0  0  0  0  0  0  0  0
    2.5163   -2.1797    0.0000 C   0  0  0  0  0  0  0  0  0  0  0  0
    0.3619   -3.3980    0.0000 O   0  0  0  0  0  0  0  0  0  0  0  0
   -3.2529   -0.3211    0.0000 O   0  0  0  0  0  0  0  0  0  0  0  0
  1  2  1  0  0  0  0
  1  6  1  0  0  0  0
  1 13  1  0  0  0  0
  2  3  1  0  0  0  0
  2 29  2  0  0  0  0
  3  4  1  0  0  0  0
  3 24  1  0  0  0  0
  3 30  1  0  0  0  0
  4  5  1  0  0  0  0
  4 47  2  0  0  0  0
  5  6  2  0  0  0  0
  6 15  1  0  0  0  0
  7  8  2  0  0  0  0
  7 12  1  0  0  0  0
  7 19  1  0  0  0  0
  8  9  1  0  0  0  0
  8 17  1  0  0  0  0
  9 10  2  0  0  0  0
 10 11  1  0  0  0  0
 10 16  1  0  0  0  0
 11 12  2  0  0  0  0
 11 14  1  0  0  0  0
 12 18  1  0  0  0  0
 13  9  1  0  0  0  0
 14  5  1  0  0  0  0
 14 31  1  0  0  0  0
 19 20  1  0  0  0  0
 19 21  2  0  0  0  0
 20 22  1  0  0  0  0
 22 23  1  0  0  0  0
 24 25  1  0  0  0  0
 24 27  2  0  0  0  0
 25 26  1  0  0  0  0
 26 28  1  0  0  0  0
 30  1  1  0  0  0  0
 31 32  2  0  0  0  0
 31 36  1  0  0  0  0
 32 33  1  0  0  0  0
 32 40  1  0  0  0  0
 33 34  1  0  0  0  0
 33 38  1  0  0  0  0
 33 39  1  0  0  0  0
 34 35  2  0  0  0  0
 34 41  1  0  0  0  0
 35 36  1  0  0  0  0
 35 42  1  0  0  0  0
 36 37  2  0  0  0  0
 42 43  1  0  0  0  0
 42 46  2  0  0  0  0
 43 44  1  0  0  0  0
 44 45  1  0  0  0  0
M  END
36
 

 54 63  0  0  0  0  0  0  0  0999 V2000
   -2.9926    3.5497    0.0000 C   0  0  0  0  0  0  0  0  0  0  0  0
   -3.8478    3.6261    0.0000 C   0  0  0  0  0  0  0  0  0  0  0  0
   -4.1716    2.8798    0.0000 N   0  0  0  0  0  0  0  0  0  0  0  0
   -3.5524    2.3153    0.0000 C   0  0  0  0  0  0  0  0  0  0  0  0
   -2.8171    2.7398    0.0000 C   0  0  0  0  0  0  0  0  0  0  0  0
   -2.3029    1.6314    0.0000 C   0  0  0  0  0  0  0  0  0  0  0  0
   -2.1401    0.8068    0.0000 C   0  0  0  0  0  0  0  0  0  0  0  0
   -1.3339    0.6966    0.0000 N   0  0  0  0  0  0  0  0  0  0  0  0
   -0.9647    1.4879    0.0000 C   0  0  0  0  0  0  0  0  0  0  0  0
   -1.5623    2.0363    0.0000 O   0  0  0  0  0  0  0  0  0  0  0  0
   -2.6781    0.2735    0.0000 Cl  0  0  0  0  0  0  0  0  0  0  0  0
   -3.6171    1.5763    0.0000 Cl  0  0  0  0  0  0  0  0  0  0  0  0
    2.7027    3.8957    0.0000 C   0  0  0  0  0  0  0  0  0  0  0  0
    3.3927    3.4887    0.0000 C   0  0  0  0  0  0  0  0  0  0  0  0
    3.4037    2.6864    0.0000 C   0  0  3  0  0  0  0  0  0  0  0  0
    2.7053    2.3112    0.0000 C   0  0  0  0  0  0  0  0  0  0  0  0
    4.0979    2.2899    0.0000 N   0  0  0  0  0  0  0  0  0  0  0  0
    4.7941    2.6943    0.0000 C   0  0  0  0  0  0  0  0  0  0  0  0
    5.4905    2.2948    0.0000 O   0  0  0  0  0  0  0  0  0  0  0  0
    4.7896    3.4974    0.0000 C   0  0  3  0  0  0  0  0  0  0  0  0
    5.4827    3.9037    0.0000 C   0  0  0  0  0  0  0  0  0  0  0  0
    6.1812    3.5068    0.0000 C   0  0  0  0  0  0  0  0  0  0  0  0
    5.4773    4.7072    0.0000 C   0  0  0  0  0  0  0  0  0  0  0  0
    4.0913    3.8952    0.0000 O   0  0  0  0  0  0  0  0  0  0  0  0
    2.7103    4.7207    0.0000 C   0  0  0  0  0  0  0  0  0  0  0  0
    1.9997    5.1398    0.0000 C   0  0  0  0  0  0  0  0  0  0  0  0
    1.2814    4.7340    0.0000 C   0  0  0  0  0  0  0  0  0  0  0  0
    1.2738    3.9091    0.0000 C   0  0  0  0  0  0  0  0  0  0  0  0
    1.9844    3.4899    0.0000 C   0  0  0  0  0  0  0  0  0  0  0  0
   -4.1952    4.3744    0.0000 C   0  0  0  0  0  0  0  0  0  0  0  0
   -3.7208    5.0494    0.0000 C   0  0  0  0  0  0  0  0  0  0  0  0
   -2.8991    4.9760    0.0000 C   0  0  0  0  0  0  0  0  0  0  0  0
   -2.5517    4.2276    0.0000 C   0  0  0  0  0  0  0  0  0  0  0  0
    0.2276    3.8500    0.0000 C   0  0  3  0  0  0  0  0  0  0  0  0
    0.0317    4.5455    0.0000 C   0  0  3  0  0  0  0  0  0  0  0  0
    0.5699    5.1377    0.0000 O   0  0  0  0  0  0  0  0  0  0  0  0
   -0.5464    3.3993    0.0000 C   0  0  0  0  0  0  0  0  0  0  0  0
   -1.1400    3.9915    0.0000 C   0  0  0  0  0  0  0  0  0  0  0  0
   -0.7081    4.6985    0.0000 N   0  0  0  0  0  0  0  0  0  0  0  0
   -1.9271    3.7674    0.0000 C   0  0  0  0  0  0  0  0  0  0  0  0
   -2.1397    2.9703    0.0000 C   0  0  0  0  0  0  0  0  0  0  0  0
   -1.5556    2.3876    0.0000 C   0  0  0  0  0  0  0  0  0  0  0  0
   -0.7589    2.6021    0.0000 C   0  0  0  0  0  0  0  0  0  0  0  0
    2.7053    1.4862    0.0000 C   0  0  0  0  0  0  0  0  0  0  0  0
    1.9908    1.0737    0.0000 C   0  0  3  0  0  0  0  0  0  0  0  0
    1.9908    0.2487    0.0000 C   0  0  0  0  0  0  0  0  0  0  0  0
    1.2763   -0.1638    0.0000 C   0  0  0  0  0  0  0  0  0  0  0  0
    2.7053   -0.1638    0.0000 C   0  0  0  0  0  0  0  0  0  0  0  0
    1.2763    1.4862    0.0000 C   0  0  0  0  0  0  0  0  0  0  0  0
    1.1901    2.3067    0.0000 O   0  0  0  0  0  0  0  0  0  0  0  0
    0.3832    2.4782    0.0000 C   0  0  0  0  0  0  0  0  0  0  0  0
   -0.0293    1.7637    0.0000 C   0  0  0  0  0  0  0  0  0  0  0  0
    0.5227    1.1506    0.0000 N   0  0  0  0  0  0  0  0  0  0  0  0
    1.9972    2.7345    0.0000 O   0  0  0  0  0  0  0  0  0  0  0  0
  1  5  1  0  0  0  0
  1 33  2  0  0  0  0
  1  2  1  0  0  0  0
  2 30  2  0  0  0  0
  3  2  1  0  0  0  0
  4  3  1  0  0  0  0
  4  5  2  0  0  0  0
  6  5  1  0  0  0  0
  6 10  1  0  0  0  0
  6  7  2  0  0  0  0
  8  7  1  0  0  0  0
  8  9  2  0  0  0  0
  9 52  1  0  0  0  0
 10  9  1  0  0  0  0
 11  7  1  0  0  0  0
 12  4  1  0  0  0  0
 13 25  2  0  0  0  0
 13 29  1  0  0  0  0
 14 13  1  0  0  0  0
 15 14  1  0  0  0  0
 16 15  1  0  0  0  0
 16 44  1  0  0  0  0
 16 54  2  0  0  0  0
 17 15  1  0  0  0  0
 18 17  1  0  0  0  0
 19 18  2  0  0  0  0
 20 18  1  0  0  0  0
 21 20  1  0  0  0  0
 22 21  1  0  0  0  0
 23 21  1  0  0  0  0
 24 20  1  0  0  0  0
 25 26  1  0  0  0  0
 26 27  2  0  0  0  0
 27 28  1  0  0  0  0
 27 36  1  0  0  0  0
 28 29  2  0  0  0  0
 28 34  1  0  0  0  0
 30 31  1  0  0  0  0
 31 32  2  0  0  0  0
 32 33  1  0  0  0  0
 33 40  1  0  0  0  0
 34 35  1  0  0  0  0
 34 37  1  0  0  0  0
 35 36  1  0  0  0  0
 35 39  1  0  0  0  0
 37 43  2  0  0  0  0
 37 38  1  0  0  0  0
 38 39  1  0  0  0  0
 38 40  2  0  0  0  0
 40 41  1  0  0  0  0
 41 42  2  0  0  0  0
 42 43  1  0  0  0  0
 44 45  1  0  0  0  0
 45 46  1  0  0  0  0
 45 49  1  0  0  0  0
 46 47  1  0  0  0  0
 46 48  1  0  0  0  0
 49 50  1  0  0  0  0
 49 53  2  0  0  0  0
 50 51  1  0  0  0  0
 51 52  2  0  0  0  0
 51 34  1  0  0  0  0
 52 53  1  0  0  0  0
M  END
37
 

 62 77  0  0  0  0  0  0  0  0999 V2000
    2.0556   -2.6175    0.0000 C   0  0  3  0  0  0  0  0  0  0  0  0
    1.3888   -3.1035    0.0000 C   0  0  3  0  0  0  0  0  0  0  0  0
    1.6449   -3.8876    0.0000 N   0  0  0  0  0  0  0  0  0  0  0  0
    2.4701   -3.8864    0.0000 C   0  0  0  0  0  0  0  0  0  0  0  0
    2.7238   -3.1014    0.0000 N   0  0  0  0  0  0  0  0  0  0  0  0
    1.7993   -1.8332    0.0000 N   0  0  0  0  0  0  0  0  0  0  0  0
    0.9744   -1.8346    0.0000 C   0  0  0  0  0  0  0  0  0  0  0  0
    0.7207   -2.6196    0.0000 N   0  0  0  0  0  0  0  0  0  0  0  0
   -1.3758   -3.1078    0.0000 C   0  0  3  0  0  0  0  0  0  0  0  0
   -2.0439   -2.6239    0.0000 C   0  0  3  0  0  0  0  0  0  0  0  0
   -2.7105   -3.1100    0.0000 N   0  0  0  0  0  0  0  0  0  0  0  0
   -2.4544   -3.8942    0.0000 C   0  0  0  0  0  0  0  0  0  0  0  0
   -1.6295   -3.8928    0.0000 N   0  0  0  0  0  0  0  0  0  0  0  0
   -0.7091   -2.6220    0.0000 N   0  0  0  0  0  0  0  0  0  0  0  0
   -0.9654   -1.8378    0.0000 C   0  0  0  0  0  0  0  0  0  0  0  0
   -1.7903   -1.8391    0.0000 N   0  0  0  0  0  0  0  0  0  0  0  0
    0.4103    2.4188    0.0000 C   0  0  3  0  0  0  0  0  0  0  0  0
   -0.4147    2.4177    0.0000 C   0  0  3  0  0  0  0  0  0  0  0  0
   -0.6684    1.6325    0.0000 N   0  0  0  0  0  0  0  0  0  0  0  0
   -0.0003    1.1487    0.0000 C   0  0  0  0  0  0  0  0  0  0  0  0
    0.6666    1.6346    0.0000 N   0  0  0  0  0  0  0  0  0  0  0  0
   -2.9024    0.0039    0.0000 C   0  0  3  0  0  0  0  0  0  0  0  0
   -2.6488    0.7890    0.0000 C   0  0  3  0  0  0  0  0  0  0  0  0
   -3.3170    1.2728    0.0000 N   0  0  0  0  0  0  0  0  0  0  0  0
   -3.9836    0.7869    0.0000 C   0  0  0  0  0  0  0  0  0  0  0  0
   -3.7274    0.0025    0.0000 N   0  0  0  0  0  0  0  0  0  0  0  0
   -2.2344   -0.4800    0.0000 N   0  0  0  0  0  0  0  0  0  0  0  0
   -1.5677    0.0061    0.0000 C   0  0  0  0  0  0  0  0  0  0  0  0
   -1.8237    0.7904    0.0000 N   0  0  0  0  0  0  0  0  0  0  0  0
    2.6495    0.7975    0.0000 C   0  0  3  0  0  0  0  0  0  0  0  0
    2.9055    0.0132    0.0000 C   0  0  3  0  0  0  0  0  0  0  0  0
    3.7308    0.0144    0.0000 N   0  0  0  0  0  0  0  0  0  0  0  0
    3.9845    0.7996    0.0000 C   0  0  0  0  0  0  0  0  0  0  0  0
    3.3161    1.2833    0.0000 N   0  0  0  0  0  0  0  0  0  0  0  0
    1.8245    0.7960    0.0000 N   0  0  0  0  0  0  0  0  0  0  0  0
    1.5709    0.0110    0.0000 C   0  0  0  0  0  0  0  0  0  0  0  0
    2.2391   -0.4730    0.0000 N   0  0  0  0  0  0  0  0  0  0  0  0
    1.7628   -1.0702    0.0000 C   0  0  0  0  0  0  0  0  0  0  0  0
    3.8087   -1.7313    0.0000 C   0  0  0  0  0  0  0  0  0  0  0  0
    1.0875    0.9972    0.0000 C   0  0  0  0  0  0  0  0  0  0  0  0
    2.3484    2.7387    0.0000 C   0  0  0  0  0  0  0  0  0  0  0  0
   -1.0873    0.9936    0.0000 C   0  0  0  0  0  0  0  0  0  0  0  0
   -2.3537    2.7310    0.0000 C   0  0  0  0  0  0  0  0  0  0  0  0
   -1.7560   -1.0758    0.0000 C   0  0  0  0  0  0  0  0  0  0  0  0
   -3.7999   -1.7435    0.0000 C   0  0  0  0  0  0  0  0  0  0  0  0
    0.0053   -2.3515    0.0000 C   0  0  0  0  0  0  0  0  0  0  0  0
    0.0088   -4.5012    0.0000 C   0  0  0  0  0  0  0  0  0  0  0  0
    0.0010    0.3235    0.0000 O   0  0  0  0  0  0  0  0  0  0  0  0
   -0.7826   -0.2477    0.0000 O   0  0  0  0  0  0  0  0  0  0  0  0
   -0.4815   -1.1696    0.0000 O   0  0  0  0  0  0  0  0  0  0  0  0
    0.4883   -1.1680    0.0000 O   0  0  0  0  0  0  0  0  0  0  0  0
    0.7865   -0.2452    0.0000 O   0  0  0  0  0  0  0  0  0  0  0  0
    0.8217    3.1338    0.0000 N   0  0  0  0  0  0  0  0  0  0  0  0
    0.4083    3.8476    0.0000 C   0  0  0  0  0  0  0  0  0  0  0  0
   -0.4167    3.8464    0.0000 C   0  0  0  0  0  0  0  0  0  0  0  0
   -0.8281    3.1315    0.0000 N   0  0  0  0  0  0  0  0  0  0  0  0
   -0.8301    4.5603    0.0000 O   0  0  0  0  0  0  0  0  0  0  0  0
    0.8197    4.5626    0.0000 O   0  0  0  0  0  0  0  0  0  0  0  0
    4.7688    1.0558    0.0000 O   0  0  0  0  0  0  0  0  0  0  0  0
    2.9563   -4.5534    0.0000 O   0  0  0  0  0  0  0  0  0  0  0  0
   -2.9384   -4.5626    0.0000 O   0  0  0  0  0  0  0  0  0  0  0  0
   -4.7688    1.0405    0.0000 O   0  0  0  0  0  0  0  0  0  0  0  0
  1  5  1  0  0  0  0
  1  6  1  0  0  0  0
  2  1  1  0  0  0  0
  2  8  1  0  0  0  0
  2  3  1  0  0  0  0
  3  4  1  0  0  0  0
  3 47  1  0  0  0  0
  4 60  2  0  0  0  0
  5  4  1  0  0  0  0
  5 39  1  0  0  0  0
  6  7  1  0  0  0  0
  6 38  1  0  0  0  0
  7 51  2  0  0  0  0
  8  7  1  0  0  0  0
  8 46  1  0  0  0  0
  9 10  1  0  0  0  0
  9 13  1  0  0  0  0
  9 14  1  0  0  0  0
 10 11  1  0  0  0  0
 10 16  1  0  0  0  0
 11 12  1  0  0  0  0
 11 45  1  0  0  0  0
 12 61  2  0  0  0  0
 13 12  1  0  0  0  0
 13 47  1  0  0  0  0
 14 15  1  0  0  0  0
 14 46  1  0  0  0  0
 15 50  2  0  0  0  0
 16 15  1  0  0  0  0
 16 44  1  0  0  0  0
 17 21  1  0  0  0  0
 17 53  1  0  0  0  0
 18 17  1  0  0  0  0
 18 19  1  0  0  0  0
 19 20  1  0  0  0  0
 19 42  1  0  0  0  0
 20 48  2  0  0  0  0
 21 20  1  0  0  0  0
 21 40  1  0  0  0  0
 22 23  1  0  0  0  0
 22 26  1  0  0  0  0
 22 27  1  0  0  0  0
 23 24  1  0  0  0  0
 23 29  1  0  0  0  0
 24 25  1  0  0  0  0
 24 43  1  0  0  0  0
 25 62  2  0  0  0  0
 26 25  1  0  0  0  0
 26 45  1  0  0  0  0
 27 28  1  0  0  0  0
 27 44  1  0  0  0  0
 28 49  2  0  0  0  0
 29 28  1  0  0  0  0
 29 42  1  0  0  0  0
 30 31  1  0  0  0  0
 30 34  1  0  0  0  0
 30 35  1  0  0  0  0
 31 32  1  0  0  0  0
 31 37  1  0  0  0  0
 32 33  1  0  0  0  0
 32 39  1  0  0  0  0
 33 59  2  0  0  0  0
 34 33  1  0  0  0  0
 34 41  1  0  0  0  0
 35 36  1  0  0  0  0
 35 40  1  0  0  0  0
 36 52  2  0  0  0  0
 37 36  1  0  0  0  0
 37 38  1  0  0  0  0
 43 56  1  0  0  0  0
 53 54  1  0  0  0  0
 53 41  1  0  0  0  0
 54 55  1  0  0  0  0
 54 58  2  0  0  0  0
 55 56  1  0  0  0  0
 55 57  2  0  0  0  0
 56 18  1  0  0  0  0
M  END
38
 

 86107  0  0  0  0  0  0  0  0999 V2000
    1.9964   -3.5081    0.0000 C   0  0  3  0  0  0  0  0  0  0  0  0
    1.2531   -3.8660    0.0000 C   0  0  3  0  0  0  0  0  0  0  0  0
    1.3638   -4.6835    0.0000 N   0  0  0  0  0  0  0  0  0  0  0  0
    2.1756   -4.8308    0.0000 C   0  0  0  0  0  0  0  0  0  0  0  0
    2.5666   -4.1043    0.0000 N   0  0  0  0  0  0  0  0  0  0  0  0
    1.8858   -2.6906    0.0000 N   0  0  0  0  0  0  0  0  0  0  0  0
    1.0738   -2.5434    0.0000 C   0  0  0  0  0  0  0  0  0  0  0  0
    0.6830   -3.2697    0.0000 N   0  0  0  0  0  0  0  0  0  0  0  0
   -1.2530   -3.8662    0.0000 C   0  0  3  0  0  0  0  0  0  0  0  0
   -1.9962   -3.5083    0.0000 C   0  0  3  0  0  0  0  0  0  0  0  0
   -2.5664   -4.1046    0.0000 N   0  0  0  0  0  0  0  0  0  0  0  0
   -2.1753   -4.8310    0.0000 C   0  0  0  0  0  0  0  0  0  0  0  0
   -1.3635   -4.6838    0.0000 N   0  0  0  0  0  0  0  0  0  0  0  0
   -0.6829   -3.2697    0.0000 N   0  0  0  0  0  0  0  0  0  0  0  0
   -1.0738   -2.5435    0.0000 C   0  0  0  0  0  0  0  0  0  0  0  0
   -1.8856   -2.6908    0.0000 N   0  0  0  0  0  0  0  0  0  0  0  0
   -3.5589   -1.5490    0.0000 C   0  0  3  0  0  0  0  0  0  0  0  0
   -3.7424   -0.7446    0.0000 C   0  0  3  0  0  0  0  0  0  0  0  0
   -4.5641   -0.6707    0.0000 N   0  0  0  0  0  0  0  0  0  0  0  0
   -4.8884   -1.4294    0.0000 C   0  0  0  0  0  0  0  0  0  0  0  0
   -4.2670   -1.9722    0.0000 N   0  0  0  0  0  0  0  0  0  0  0  0
   -2.7372   -1.6229    0.0000 N   0  0  0  0  0  0  0  0  0  0  0  0
   -2.4130   -0.8643    0.0000 C   0  0  0  0  0  0  0  0  0  0  0  0
   -3.0341   -0.3216    0.0000 N   0  0  0  0  0  0  0  0  0  0  0  0
   -3.1850    1.6985    0.0000 C   0  0  3  0  0  0  0  0  0  0  0  0
   -2.6705    2.3437    0.0000 C   0  0  3  0  0  0  0  0  0  0  0  0
   -3.1252    3.0320    0.0000 N   0  0  0  0  0  0  0  0  0  0  0  0
   -3.9203    2.8126    0.0000 C   0  0  0  0  0  0  0  0  0  0  0  0
   -3.9573    1.9883    0.0000 N   0  0  0  0  0  0  0  0  0  0  0  0
   -2.7304    1.0100    0.0000 N   0  0  0  0  0  0  0  0  0  0  0  0
   -1.9352    1.2296    0.0000 C   0  0  0  0  0  0  0  0  0  0  0  0
   -1.8982    2.0537    0.0000 N   0  0  0  0  0  0  0  0  0  0  0  0
   -0.4127    3.4310    0.0000 C   0  0  3  0  0  0  0  0  0  0  0  0
    0.4123    3.4310    0.0000 C   0  0  3  0  0  0  0  0  0  0  0  0
   -0.6676    2.6463    0.0000 N   0  0  0  0  0  0  0  0  0  0  0  0
   -0.0001    2.1615    0.0000 C   0  0  0  0  0  0  0  0  0  0  0  0
    0.6672    2.6465    0.0000 N   0  0  0  0  0  0  0  0  0  0  0  0
    2.6702    2.3438    0.0000 C   0  0  3  0  0  0  0  0  0  0  0  0
    3.1846    1.6988    0.0000 C   0  0  3  0  0  0  0  0  0  0  0  0
    3.9570    1.9888    0.0000 N   0  0  0  0  0  0  0  0  0  0  0  0
    3.9199    2.8129    0.0000 C   0  0  0  0  0  0  0  0  0  0  0  0
    3.1247    3.0323    0.0000 N   0  0  0  0  0  0  0  0  0  0  0  0
    1.8978    2.0540    0.0000 N   0  0  0  0  0  0  0  0  0  0  0  0
    1.9349    1.2298    0.0000 C   0  0  0  0  0  0  0  0  0  0  0  0
    2.7301    1.0103    0.0000 N   0  0  0  0  0  0  0  0  0  0  0  0
    3.7424   -0.7443    0.0000 C   0  0  3  0  0  0  0  0  0  0  0  0
    3.5589   -1.5487    0.0000 C   0  0  3  0  0  0  0  0  0  0  0  0
    4.2670   -1.9717    0.0000 N   0  0  0  0  0  0  0  0  0  0  0  0
    4.8884   -1.4291    0.0000 C   0  0  0  0  0  0  0  0  0  0  0  0
    4.5639   -0.6704    0.0000 N   0  0  0  0  0  0  0  0  0  0  0  0
    3.0341   -0.3213    0.0000 N   0  0  0  0  0  0  0  0  0  0  0  0
    2.4128   -0.8642    0.0000 C   0  0  0  0  0  0  0  0  0  0  0  0
    2.7371   -1.6226    0.0000 N   0  0  0  0  0  0  0  0  0  0  0  0
    2.1110   -1.9968    0.0000 C   0  0  0  0  0  0  0  0  0  0  0  0
    3.7528   -3.3060    0.0000 C   0  0  0  0  0  0  0  0  0  0  0  0
    2.6321    0.2874    0.0000 C   0  0  0  0  0  0  0  0  0  0  0  0
    4.6795    0.7549    0.0000 C   0  0  0  0  0  0  0  0  0  0  0  0
    1.1713    2.1193    0.0000 C   0  0  0  0  0  0  0  0  0  0  0  0
    2.0823    4.0113    0.0000 C   0  0  0  0  0  0  0  0  0  0  0  0
   -1.1716    2.1190    0.0000 C   0  0  0  0  0  0  0  0  0  0  0  0
   -2.0830    4.0108    0.0000 C   0  0  0  0  0  0  0  0  0  0  0  0
   -2.6323    0.2871    0.0000 C   0  0  0  0  0  0  0  0  0  0  0  0
   -4.6798    0.7543    0.0000 C   0  0  0  0  0  0  0  0  0  0  0  0
   -2.1107   -1.9968    0.0000 C   0  0  0  0  0  0  0  0  0  0  0  0
   -3.7525   -3.3065    0.0000 C   0  0  0  0  0  0  0  0  0  0  0  0
   -0.0000   -3.0134    0.0000 C   0  0  0  0  0  0  0  0  0  0  0  0
    0.0005   -5.1133    0.0000 C   0  0  0  0  0  0  0  0  0  0  0  0
   -1.2901    0.7153    0.0000 O   0  0  0  0  0  0  0  0  0  0  0  0
   -0.0000    1.3364    0.0000 O   0  0  0  0  0  0  0  0  0  0  0  0
    1.2899    0.7153    0.0000 O   0  0  0  0  0  0  0  0  0  0  0  0
   -1.6088   -0.6807    0.0000 O   0  0  0  0  0  0  0  0  0  0  0  0
   -0.7160   -1.8003    0.0000 O   0  0  0  0  0  0  0  0  0  0  0  0
    0.7158   -1.8000    0.0000 O   0  0  0  0  0  0  0  0  0  0  0  0
    1.6086   -0.6807    0.0000 O   0  0  0  0  0  0  0  0  0  0  0  0
   -4.5654    3.3270    0.0000 O   0  0  0  0  0  0  0  0  0  0  0  0
   -5.6928   -1.6129    0.0000 O   0  0  0  0  0  0  0  0  0  0  0  0
   -2.5334   -5.5744    0.0000 O   0  0  0  0  0  0  0  0  0  0  0  0
    2.5338   -5.5743    0.0000 O   0  0  0  0  0  0  0  0  0  0  0  0
    5.6928   -1.6126    0.0000 O   0  0  0  0  0  0  0  0  0  0  0  0
    4.5648    3.3273    0.0000 O   0  0  0  0  0  0  0  0  0  0  0  0
    0.8247    4.1454    0.0000 N   0  0  0  0  0  0  0  0  0  0  0  0
    0.4123    4.8600    0.0000 C   0  0  0  0  0  0  0  0  0  0  0  0
   -0.4127    4.8600    0.0000 C   0  0  0  0  0  0  0  0  0  0  0  0
   -0.8252    4.1454    0.0000 N   0  0  0  0  0  0  0  0  0  0  0  0
   -0.8252    5.5744    0.0000 O   0  0  0  0  0  0  0  0  0  0  0  0
    0.8247    5.5744    0.0000 O   0  0  0  0  0  0  0  0  0  0  0  0
  1  5  1  0  0  0  0
  1  6  1  0  0  0  0
  2  1  1  0  0  0  0
  2  3  1  0  0  0  0
  2  8  1  0  0  0  0
  3  4  1  0  0  0  0
  3 67  1  0  0  0  0
  4 78  2  0  0  0  0
  5  4  1  0  0  0  0
  5 55  1  0  0  0  0
  6  7  1  0  0  0  0
  6 54  1  0  0  0  0
  7 73  2  0  0  0  0
  8  7  1  0  0  0  0
  8 66  1  0  0  0  0
  9 14  1  0  0  0  0
  9 13  1  0  0  0  0
 10  9  1  0  0  0  0
 10 11  1  0  0  0  0
 10 16  1  0  0  0  0
 11 12  1  0  0  0  0
 11 65  1  0  0  0  0
 12 77  2  0  0  0  0
 13 12  1  0  0  0  0
 13 67  1  0  0  0  0
 14 15  1  0  0  0  0
 14 66  1  0  0  0  0
 15 72  2  0  0  0  0
 16 15  1  0  0  0  0
 16 64  1  0  0  0  0
 17 22  1  0  0  0  0
 17 21  1  0  0  0  0
 18 17  1  0  0  0  0
 18 19  1  0  0  0  0
 18 24  1  0  0  0  0
 19 20  1  0  0  0  0
 19 63  1  0  0  0  0
 20 76  2  0  0  0  0
 21 20  1  0  0  0  0
 21 65  1  0  0  0  0
 22 23  1  0  0  0  0
 22 64  1  0  0  0  0
 23 71  2  0  0  0  0
 24 23  1  0  0  0  0
 24 62  1  0  0  0  0
 25 29  1  0  0  0  0
 25 30  1  0  0  0  0
 26 25  1  0  0  0  0
 26 27  1  0  0  0  0
 26 32  1  0  0  0  0
 27 28  1  0  0  0  0
 27 61  1  0  0  0  0
 28 75  2  0  0  0  0
 29 28  1  0  0  0  0
 29 63  1  0  0  0  0
 30 31  1  0  0  0  0
 30 62  1  0  0  0  0
 31 68  2  0  0  0  0
 32 31  1  0  0  0  0
 32 60  1  0  0  0  0
 33 35  1  0  0  0  0
 34 33  1  0  0  0  0
 34 37  1  0  0  0  0
 34 81  1  0  0  0  0
 35 36  1  0  0  0  0
 35 60  1  0  0  0  0
 36 69  2  0  0  0  0
 37 36  1  0  0  0  0
 37 58  1  0  0  0  0
 38 39  1  0  0  0  0
 38 42  1  0  0  0  0
 38 43  1  0  0  0  0
 39 40  1  0  0  0  0
 39 45  1  0  0  0  0
 40 41  1  0  0  0  0
 40 57  1  0  0  0  0
 41 80  2  0  0  0  0
 42 41  1  0  0  0  0
 42 59  1  0  0  0  0
 43 44  1  0  0  0  0
 43 58  1  0  0  0  0
 44 70  2  0  0  0  0
 45 44  1  0  0  0  0
 45 56  1  0  0  0  0
 46 51  1  0  0  0  0
 46 50  1  0  0  0  0
 47 46  1  0  0  0  0
 47 48  1  0  0  0  0
 47 53  1  0  0  0  0
 48 49  1  0  0  0  0
 48 55  1  0  0  0  0
 49 79  2  0  0  0  0
 50 49  1  0  0  0  0
 50 57  1  0  0  0  0
 51 52  1  0  0  0  0
 51 56  1  0  0  0  0
 52 74  2  0  0  0  0
 53 52  1  0  0  0  0
 53 54  1  0  0  0  0
 61 84  1  0  0  0  0
 81 82  1  0  0  0  0
 81 59  1  0  0  0  0
 82 83  1  0  0  0  0
 82 86  2  0  0  0  0
 83 84  1  0  0  0  0
 83 85  2  0  0  0  0
 84 33  1  0  0  0  0
M  END
39
 

108114  0  0  0  0  0  0  0  0999 V2000
   -2.8963    4.1972    0.0000 C   0  0  0  0  0  0  0  0  0  0  0  0
   -3.3088    3.4827    0.0000 C   0  0  0  0  0  0  0  0  0  0  0  0
   -2.8963    2.7682    0.0000 C   0  0  0  0  0  0  0  0  0  0  0  0
   -2.0713    2.7682    0.0000 C   0  0  0  0  0  0  0  0  0  0  0  0
   -1.6588    3.4827    0.0000 C   0  0  0  0  0  0  0  0  0  0  0  0
   -2.0713    4.1972    0.0000 C   0  0  0  0  0  0  0  0  0  0  0  0
   -1.2766    7.2227    0.0000 C   0  0  0  0  0  0  0  0  0  0  0  0
   -1.6891    6.5082    0.0000 C   0  0  0  0  0  0  0  0  0  0  0  0
   -1.2766    5.7937    0.0000 C   0  0  0  0  0  0  0  0  0  0  0  0
   -0.4516    5.7937    0.0000 C   0  0  0  0  0  0  0  0  0  0  0  0
   -0.0391    6.5082    0.0000 C   0  0  0  0  0  0  0  0  0  0  0  0
   -0.4516    7.2227    0.0000 C   0  0  0  0  0  0  0  0  0  0  0  0
   -0.4272    1.1925    0.0000 C   0  0  0  0  0  0  0  0  0  0  0  0
   -1.2522    1.1925    0.0000 C   0  0  0  0  0  0  0  0  0  0  0  0
   -1.6647    0.4780    0.0000 C   0  0  0  0  0  0  0  0  0  0  0  0
   -1.2522   -0.2365    0.0000 C   0  0  0  0  0  0  0  0  0  0  0  0
   -0.4272   -0.2365    0.0000 C   0  0  0  0  0  0  0  0  0  0  0  0
   -0.0147    0.4780    0.0000 C   0  0  0  0  0  0  0  0  0  0  0  0
   -2.9256    5.6852    0.0000 C   0  0  0  0  0  0  0  0  0  0  0  0
   -2.9111    1.2818    0.0000 C   0  0  0  0  0  0  0  0  0  0  0  0
   -0.0391    5.0792    0.0000 C   0  0  0  0  0  0  0  0  0  0  0  0
   -0.8338    3.4827    0.0000 C   0  0  0  0  0  0  0  0  0  0  0  0
   -0.0147    1.9069    0.0000 C   0  0  0  0  0  0  0  0  0  0  0  0
   -0.0088    3.4827    0.0000 C   0  0  0  0  0  0  0  0  0  0  0  0
    0.3630    4.3588    0.0000 C   0  0  0  0  0  0  0  0  0  0  0  0
    0.3978    2.6214    0.0000 C   0  0  0  0  0  0  0  0  0  0  0  0
   -0.8338    4.3077    0.0000 C   0  0  0  0  0  0  0  0  0  0  0  0
   -0.7535    4.6667    0.0000 C   0  0  0  0  0  0  0  0  0  0  0  0
    0.6754    5.4917    0.0000 C   0  0  0  0  0  0  0  0  0  0  0  0
   -0.7292    2.3194    0.0000 C   0  0  0  0  0  0  0  0  0  0  0  0
    0.6998    1.4944    0.0000 C   0  0  0  0  0  0  0  0  0  0  0  0
   -0.8338    2.6577    0.0000 C   0  0  0  0  0  0  0  0  0  0  0  0
   -4.1338    3.4827    0.0000 O   0  0  0  0  0  0  0  0  0  0  0  0
   -1.6891    7.9371    0.0000 O   0  0  0  0  0  0  0  0  0  0  0  0
   -1.6647   -0.9510    0.0000 O   0  0  0  0  0  0  0  0  0  0  0  0
   -4.5463    2.7682    0.0000 C   0  0  0  0  0  0  0  0  0  0  0  0
   -5.3713    2.7682    0.0000 C   0  0  0  0  0  0  0  0  0  0  0  0
   -5.7838    2.0537    0.0000 O   0  0  0  0  0  0  0  0  0  0  0  0
   -5.7838    3.4827    0.0000 O   0  0  0  0  0  0  0  0  0  0  0  0
   -6.6088    2.0537    0.0000 C   0  0  0  0  0  0  0  0  0  0  0  0
   -7.0213    1.3393    0.0000 C   0  0  0  0  0  0  0  0  0  0  0  0
   -2.5141    7.9371    0.0000 C   0  0  0  0  0  0  0  0  0  0  0  0
   -2.9266    8.6516    0.0000 C   0  0  0  0  0  0  0  0  0  0  0  0
   -3.7516    8.6516    0.0000 O   0  0  0  0  0  0  0  0  0  0  0  0
   -4.1641    9.3661    0.0000 C   0  0  0  0  0  0  0  0  0  0  0  0
   -4.9891    9.3661    0.0000 C   0  0  0  0  0  0  0  0  0  0  0  0
   -2.5141    9.3661    0.0000 O   0  0  0  0  0  0  0  0  0  0  0  0
   -2.4897   -0.9510    0.0000 C   0  0  0  0  0  0  0  0  0  0  0  0
   -2.9022   -1.6655    0.0000 C   0  0  0  0  0  0  0  0  0  0  0  0
   -3.7272   -1.6655    0.0000 O   0  0  0  0  0  0  0  0  0  0  0  0
   -4.1397   -2.3799    0.0000 C   0  0  0  0  0  0  0  0  0  0  0  0
   -4.9647   -2.3799    0.0000 C   0  0  0  0  0  0  0  0  0  0  0  0
   -2.4897   -2.3799    0.0000 O   0  0  0  0  0  0  0  0  0  0  0  0
    4.7422    2.7772    0.0000 C   0  0  0  0  0  0  0  0  0  0  0  0
    5.1546    3.4917    0.0000 C   0  0  0  0  0  0  0  0  0  0  0  0
    4.7421    4.2062    0.0000 C   0  0  0  0  0  0  0  0  0  0  0  0
    3.9171    4.2062    0.0000 C   0  0  0  0  0  0  0  0  0  0  0  0
    3.5046    3.4917    0.0000 C   0  0  0  0  0  0  0  0  0  0  0  0
    3.9172    2.7772    0.0000 C   0  0  0  0  0  0  0  0  0  0  0  0
    3.1224   -0.2483    0.0000 C   0  0  0  0  0  0  0  0  0  0  0  0
    3.5349    0.4662    0.0000 C   0  0  0  0  0  0  0  0  0  0  0  0
    3.1224    1.1807    0.0000 C   0  0  0  0  0  0  0  0  0  0  0  0
    2.2974    1.1807    0.0000 C   0  0  0  0  0  0  0  0  0  0  0  0
    1.8849    0.4662    0.0000 C   0  0  0  0  0  0  0  0  0  0  0  0
    2.2974   -0.2483    0.0000 C   0  0  0  0  0  0  0  0  0  0  0  0
    2.2730    5.7819    0.0000 C   0  0  0  0  0  0  0  0  0  0  0  0
    3.0980    5.7819    0.0000 C   0  0  0  0  0  0  0  0  0  0  0  0
    3.5105    6.4964    0.0000 C   0  0  0  0  0  0  0  0  0  0  0  0
    3.0980    7.2109    0.0000 C   0  0  0  0  0  0  0  0  0  0  0  0
    2.2730    7.2109    0.0000 C   0  0  0  0  0  0  0  0  0  0  0  0
    1.8605    6.4964    0.0000 C   0  0  0  0  0  0  0  0  0  0  0  0
    4.7714    1.2891    0.0000 C   0  0  0  0  0  0  0  0  0  0  0  0
    4.7569    5.6926    0.0000 C   0  0  0  0  0  0  0  0  0  0  0  0
    1.8849    1.8951    0.0000 C   0  0  0  0  0  0  0  0  0  0  0  0
    2.6796    3.4917    0.0000 C   0  0  0  0  0  0  0  0  0  0  0  0
    1.8605    5.0674    0.0000 C   0  0  0  0  0  0  0  0  0  0  0  0
    1.8546    3.4917    0.0000 C   0  0  0  0  0  0  0  0  0  0  0  0
    1.4828    2.6155    0.0000 C   0  0  0  0  0  0  0  0  0  0  0  0
    1.4480    4.3530    0.0000 C   0  0  0  0  0  0  0  0  0  0  0  0
    2.6796    2.6667    0.0000 C   0  0  0  0  0  0  0  0  0  0  0  0
    2.5993    2.3076    0.0000 C   0  0  0  0  0  0  0  0  0  0  0  0
    1.1704    1.4826    0.0000 C   0  0  0  0  0  0  0  0  0  0  0  0
    2.5750    4.6549    0.0000 C   0  0  0  0  0  0  0  0  0  0  0  0
    1.1460    5.4799    0.0000 C   0  0  0  0  0  0  0  0  0  0  0  0
    2.6796    4.3167    0.0000 C   0  0  0  0  0  0  0  0  0  0  0  0
    5.9796    3.4917    0.0000 O   0  0  0  0  0  0  0  0  0  0  0  0
    3.5349   -0.9628    0.0000 O   0  0  0  0  0  0  0  0  0  0  0  0
    3.5105    7.9254    0.0000 O   0  0  0  0  0  0  0  0  0  0  0  0
    6.3921    2.7772    0.0000 C   0  0  0  0  0  0  0  0  0  0  0  0
    7.2171    2.7772    0.0000 C   0  0  0  0  0  0  0  0  0  0  0  0
    7.6296    2.0627    0.0000 O   0  0  0  0  0  0  0  0  0  0  0  0
    7.6296    3.4917    0.0000 O   0  0  0  0  0  0  0  0  0  0  0  0
    8.4546    2.0627    0.0000 C   0  0  0  0  0  0  0  0  0  0  0  0
    8.8671    1.3483    0.0000 C   0  0  0  0  0  0  0  0  0  0  0  0
    4.3599   -0.9628    0.0000 C   0  0  0  0  0  0  0  0  0  0  0  0
    4.7724   -1.6772    0.0000 C   0  0  0  0  0  0  0  0  0  0  0  0
    5.5974   -1.6772    0.0000 O   0  0  0  0  0  0  0  0  0  0  0  0
    6.0099   -2.3917    0.0000 C   0  0  0  0  0  0  0  0  0  0  0  0
    6.8349   -2.3917    0.0000 C   0  0  0  0  0  0  0  0  0  0  0  0
    4.3599   -2.3917    0.0000 O   0  0  0  0  0  0  0  0  0  0  0  0
    4.3355    7.9254    0.0000 C   0  0  0  0  0  0  0  0  0  0  0  0
    4.7480    8.6398    0.0000 C   0  0  0  0  0  0  0  0  0  0  0  0
    5.5730    8.6398    0.0000 O   0  0  0  0  0  0  0  0  0  0  0  0
    5.9855    9.3543    0.0000 C   0  0  0  0  0  0  0  0  0  0  0  0
    6.8105    9.3543    0.0000 C   0  0  0  0  0  0  0  0  0  0  0  0
    4.3355    9.3543    0.0000 O   0  0  0  0  0  0  0  0  0  0  0  0
    0.9096    7.8060    0.0000 C   0  0  0  0  0  0  0  0  0  0  0  0
    0.9281   -0.8331    0.0000 C   0  0  0  0  0  0  0  0  0  0  0  0
  1  2  2  0  0  0  0
  1  6  1  0  0  0  0
  2  3  1  0  0  0  0
  2 33  1  0  0  0  0
  3  4  2  0  0  0  0
  3 20  1  0  0  0  0
  4  5  1  0  0  0  0
  5  6  2  0  0  0  0
  5 22  1  0  0  0  0
  7  8  2  0  0  0  0
  7 12  1  0  0  0  0
  7 34  1  0  0  0  0
  8  9  1  0  0  0  0
  8 19  1  0  0  0  0
  9 10  2  0  0  0  0
 10 11  1  0  0  0  0
 10 21  1  0  0  0  0
 11 12  2  0  0  0  0
 12107  1  0  0  0  0
 13 14  2  0  0  0  0
 13 18  1  0  0  0  0
 13 23  1  0  0  0  0
 14 15  1  0  0  0  0
 15 16  2  0  0  0  0
 16 17  1  0  0  0  0
 16 35  1  0  0  0  0
 17 18  2  0  0  0  0
 17108  1  0  0  0  0
 19  1  1  0  0  0  0
 20 15  1  0  0  0  0
 21 25  1  0  0  0  0
 21 28  1  0  0  0  0
 21 29  1  0  0  0  0
 22 24  1  0  0  0  0
 22 27  1  0  0  0  0
 22 32  1  0  0  0  0
 23 26  1  0  0  0  0
 23 30  1  0  0  0  0
 23 31  1  0  0  0  0
 33 36  1  0  0  0  0
 34 42  1  0  0  0  0
 35 48  1  0  0  0  0
 36 37  1  0  0  0  0
 37 38  1  0  0  0  0
 37 39  2  0  0  0  0
 38 40  1  0  0  0  0
 40 41  1  0  0  0  0
 42 43  1  0  0  0  0
 43 44  1  0  0  0  0
 43 47  2  0  0  0  0
 44 45  1  0  0  0  0
 45 46  1  0  0  0  0
 48 49  1  0  0  0  0
 49 50  1  0  0  0  0
 49 53  2  0  0  0  0
 50 51  1  0  0  0  0
 51 52  1  0  0  0  0
 54 55  2  0  0  0  0
 54 59  1  0  0  0  0
 55 56  1  0  0  0  0
 55 86  1  0  0  0  0
 56 57  2  0  0  0  0
 56 73  1  0  0  0  0
 57 58  1  0  0  0  0
 58 59  2  0  0  0  0
 58 75  1  0  0  0  0
 60 61  2  0  0  0  0
 60 65  1  0  0  0  0
 60 87  1  0  0  0  0
 61 62  1  0  0  0  0
 61 72  1  0  0  0  0
 62 63  2  0  0  0  0
 63 64  1  0  0  0  0
 63 74  1  0  0  0  0
 64 65  2  0  0  0  0
 66 67  2  0  0  0  0
 66 71  1  0  0  0  0
 66 76  1  0  0  0  0
 67 68  1  0  0  0  0
 68 69  2  0  0  0  0
 69 70  1  0  0  0  0
 69 88  1  0  0  0  0
 70 71  2  0  0  0  0
 72 54  1  0  0  0  0
 73 68  1  0  0  0  0
 74 78  1  0  0  0  0
 74 81  1  0  0  0  0
 74 82  1  0  0  0  0
 75 77  1  0  0  0  0
 75 80  1  0  0  0  0
 75 85  1  0  0  0  0
 76 79  1  0  0  0  0
 76 83  1  0  0  0  0
 76 84  1  0  0  0  0
 86 89  1  0  0  0  0
 87 95  1  0  0  0  0
 88101  1  0  0  0  0
 89 90  1  0  0  0  0
 90 91  1  0  0  0  0
 90 92  2  0  0  0  0
 91 93  1  0  0  0  0
 93 94  1  0  0  0  0
 95 96  1  0  0  0  0
 96 97  1  0  0  0  0
 96100  2  0  0  0  0
 97 98  1  0  0  0  0
 98 99  1  0  0  0  0
101102  1  0  0  0  0
102103  1  0  0  0  0
102106  2  0  0  0  0
103104  1  0  0  0  0
104105  1  0  0  0  0
107 70  1  0  0  0  0
108 65  1  0  0  0  0
M  END
40
 

 29 37  0  0  0  0  0  0  0  0999 V2000
   -1.3942   -1.4787    0.0000 C   0  0  3  0  0  0  0  0  0  0  0  0
   -0.8398    0.2277    0.0000 C   0  0  3  0  0  0  0  0  0  0  0  0
   -0.7288   -2.7826    0.0000 C   0  0  0  0  0  0  0  0  0  0  0  0
   -1.3925   -2.2930    0.0000 C   0  0  0  0  0  0  0  0  0  0  0  0
   -1.8790   -0.8115    0.0000 C   0  0  0  0  0  0  0  0  0  0  0  0
   -1.6242   -0.0271    0.0000 C   0  0  3  0  0  0  0  0  0  0  0  0
   -0.3538    0.8972    0.0000 C   0  0  3  0  0  0  0  0  0  0  0  0
    0.0574   -1.7086    0.0000 C   0  0  3  0  0  0  0  0  0  0  0  0
   -0.6098   -1.2238    0.0000 C   0  0  3  0  0  0  0  0  0  0  0  0
   -0.3549   -0.4395    0.0000 C   0  0  3  0  0  0  0  0  0  0  0  0
    0.4698   -0.4395    0.0000 C   0  0  3  0  0  0  0  0  0  0  0  0
    0.7248   -1.2238    0.0000 C   0  0  3  0  0  0  0  0  0  0  0  0
    1.5091   -1.4787    0.0000 C   0  0  3  0  0  0  0  0  0  0  0  0
    0.9547    0.2277    0.0000 C   0  0  3  0  0  0  0  0  0  0  0  0
    0.0574   -2.5334    0.0000 C   0  0  3  0  0  0  0  0  0  0  0  0
    0.8437   -2.7826    0.0000 C   0  0  0  0  0  0  0  0  0  0  0  0
    1.5074   -2.2930    0.0000 C   0  0  0  0  0  0  0  0  0  0  0  0
    1.9939   -0.8115    0.0000 C   0  0  0  0  0  0  0  0  0  0  0  0
    1.7391   -0.0271    0.0000 C   0  0  0  0  0  0  0  0  0  0  0  0
    0.4687    0.8972    0.0000 C   0  0  0  0  0  0  0  0  0  0  0  0
   -0.9370    1.4804    0.0000 C   0  0  0  0  0  0  0  0  0  0  0  0
   -1.4107    0.7695    0.0000 C   0  0  3  0  0  0  0  0  0  0  0  0
   -1.9939    1.3527    0.0000 C   0  0  0  0  0  0  0  0  0  0  0  0
    0.6313    1.1893    0.0000 C   0  0  3  0  0  0  0  0  0  0  0  0
    1.2144    1.7725    0.0000 C   0  0  0  0  0  0  0  0  0  0  0  0
    1.0010    2.5691    0.0000 C   0  0  0  0  0  0  0  0  0  0  0  0
    0.2043    2.7826    0.0000 C   0  0  0  0  0  0  0  0  0  0  0  0
   -0.3788    2.1994    0.0000 C   0  0  0  0  0  0  0  0  0  0  0  0
   -0.1654    1.4028    0.0000 C   0  0  3  0  0  0  0  0  0  0  0  0
  1  4  1  0  0  0  0
  2  7  1  0  0  0  0
  3  4  1  0  0  0  0
  3 15  1  0  0  0  0
  5  6  1  0  0  0  0
  5  1  1  0  0  0  0
  6  2  1  0  0  0  0
  6 22  1  0  0  0  0
  7 20  1  0  0  0  0
  7 21  1  0  0  0  0
  8  9  1  0  0  0  0
  8 12  1  0  0  0  0
  8 15  1  0  0  0  0
  9  1  1  0  0  0  0
  9 10  1  0  0  0  0
 10  2  1  0  0  0  0
 10 11  1  0  0  0  0
 11 12  1  0  0  0  0
 11 14  1  0  0  0  0
 12 13  1  0  0  0  0
 13 17  1  0  0  0  0
 14 20  1  0  0  0  0
 14 24  1  0  0  0  0
 16 17  1  0  0  0  0
 16 15  1  0  0  0  0
 18 19  1  0  0  0  0
 18 13  1  0  0  0  0
 19 14  1  0  0  0  0
 22 23  1  0  0  0  0
 23 21  1  0  0  0  0
 24 25  1  0  0  0  0
 25 26  1  0  0  0  0
 26 27  1  0  0  0  0
 27 28  1  0  0  0  0
 28 29  1  0  0  0  0
 29 24  1  0  0  0  0
 29 22  1  0  0  0  0
M  END
41
 

 30 36  0  0  0  0  0  0  0  0999 V2000
   -5.7018    5.1474    0.0000 C   0  0  0  0  0  0  0  0  0  0  0  0
   -6.4987    4.9339    0.0000 C   0  0  0  0  0  0  0  0  0  0  0  0
   -6.7123    4.1370    0.0000 C   0  0  0  0  0  0  0  0  0  0  0  0
   -6.1289    3.5536    0.0000 C   0  0  0  0  0  0  0  0  0  0  0  0
   -5.3320    3.7671    0.0000 C   0  0  0  0  0  0  0  0  0  0  0  0
   -5.1185    4.5640    0.0000 C   0  0  0  0  0  0  0  0  0  0  0  0
   -7.4684    3.8071    0.0000 C   0  0  3  0  0  0  0  0  0  0  0  0
   -8.1978    4.1926    0.0000 C   0  0  0  0  0  0  0  0  0  0  0  0
   -8.3512    5.0032    0.0000 C   0  0  3  0  0  0  0  0  0  0  0  0
   -7.8130    5.6285    0.0000 C   0  0  0  0  0  0  0  0  0  0  0  0
   -6.9886    5.5977    0.0000 C   0  0  0  0  0  0  0  0  0  0  0  0
   -8.9213    3.7962    0.0000 C   0  0  0  0  0  0  0  0  0  0  0  0
   -9.5219    4.3619    0.0000 C   0  0  0  0  0  0  0  0  0  0  0  0
   -9.1695    5.1078    0.0000 O   0  0  0  0  0  0  0  0  0  0  0  0
   -9.0289    1.8359    0.0000 C   0  0  0  0  0  0  0  0  0  0  0  0
   -8.3144    2.2485    0.0000 C   0  0  0  0  0  0  0  0  0  0  0  0
   -8.3144    3.0735    0.0000 C   0  0  0  0  0  0  0  0  0  0  0  0
   -9.0289    3.4860    0.0000 C   0  0  0  0  0  0  0  0  0  0  0  0
   -9.7433    3.0735    0.0000 C   0  0  0  0  0  0  0  0  0  0  0  0
   -9.7433    2.2485    0.0000 C   0  0  0  0  0  0  0  0  0  0  0  0
  -10.3325    4.2085    0.0000 O   0  0  0  0  0  0  0  0  0  0  0  0
   -7.4926    2.3234    0.0000 C   0  0  3  0  0  0  0  0  0  0  0  0
   -6.8651    1.9177    0.0000 C   0  0  0  0  0  0  0  0  0  0  0  0
   -6.5071    2.6609    0.0000 C   0  0  0  0  0  0  0  0  0  0  0  0
   -6.8651    3.4043    0.0000 C   0  0  0  0  0  0  0  0  0  0  0  0
   -7.6694    3.5878    0.0000 C   0  0  3  0  0  0  0  0  0  0  0  0
   -6.2688    1.3476    0.0000 C   0  0  0  0  0  0  0  0  0  0  0  0
   -5.5423    1.7385    0.0000 C   0  0  0  0  0  0  0  0  0  0  0  0
   -5.6896    2.5502    0.0000 O   0  0  0  0  0  0  0  0  0  0  0  0
   -4.7990    1.3805    0.0000 O   0  0  0  0  0  0  0  0  0  0  0  0
  1  2  2  0  0  0  0
  1  6  1  0  0  0  0
  2  3  1  0  0  0  0
  3  4  2  0  0  0  0
  3  7  1  0  0  0  0
  4  5  1  0  0  0  0
  5  6  2  0  0  0  0
  7  8  1  0  0  0  0
  7 22  1  0  0  0  0
  8  9  1  0  0  0  0
  8 12  2  0  0  0  0
  9 10  1  0  0  0  0
  9 14  1  0  0  0  0
 10 11  2  0  0  0  0
 11  2  1  0  0  0  0
 12 13  1  0  0  0  0
 13 14  1  0  0  0  0
 13 21  2  0  0  0  0
 15 16  2  0  0  0  0
 15 20  1  0  0  0  0
 16 17  1  0  0  0  0
 16 22  1  0  0  0  0
 17 18  2  0  0  0  0
 18 19  1  0  0  0  0
 19 20  2  0  0  0  0
 22 23  1  0  0  0  0
 23 24  1  0  0  0  0
 23 27  2  0  0  0  0
 24 25  2  0  0  0  0
 24 29  1  0  0  0  0
 26 17  1  0  0  0  0
 26  9  1  0  0  0  0
 26 25  1  0  0  0  0
 27 28  1  0  0  0  0
 28 29  1  0  0  0  0
 28 30  2  0  0  0  0
M  END
42
 

 33 41  0  0  0  0  0  0  0  0999 V2000
   -5.5982    2.8821    0.0000 O   0  0  0  0  0  0  0  0  0  0  0  0
   -6.2656    2.3972    0.0000 C   0  0  0  0  0  0  0  0  0  0  0  0
   -6.0107    1.6126    0.0000 C   0  0  3  0  0  0  0  0  0  0  0  0
   -5.1857    1.6126    0.0000 C   0  0  3  0  0  0  0  0  0  0  0  0
   -4.9308    2.3972    0.0000 C   0  0  0  0  0  0  0  0  0  0  0  0
   -6.0108    0.6551    0.0000 C   0  0  3  0  0  0  0  0  0  0  0  0
   -5.1858    0.6551    0.0000 C   0  0  3  0  0  0  0  0  0  0  0  0
   -6.2657   -0.1295    0.0000 C   0  0  0  0  0  0  0  0  0  0  0  0
   -5.5983   -0.6144    0.0000 O   0  0  0  0  0  0  0  0  0  0  0  0
   -4.9308   -0.1295    0.0000 C   0  0  0  0  0  0  0  0  0  0  0  0
   -6.5562    2.1899    0.0000 C   0  0  0  0  0  0  0  0  0  0  0  0
   -4.6206    2.1899    0.0000 C   0  0  0  0  0  0  0  0  0  0  0  0
   -6.5562    0.0189    0.0000 C   0  0  0  0  0  0  0  0  0  0  0  0
   -4.6206    0.0188    0.0000 C   0  0  0  0  0  0  0  0  0  0  0  0
   -6.8918    2.9436    0.0000 C   0  0  0  0  0  0  0  0  0  0  0  0
   -7.7123    3.0298    0.0000 C   0  0  0  0  0  0  0  0  0  0  0  0
   -8.1972    2.3624    0.0000 C   0  0  0  0  0  0  0  0  0  0  0  0
   -7.8616    1.6087    0.0000 C   0  0  0  0  0  0  0  0  0  0  0  0
   -7.0411    1.5225    0.0000 C   0  0  0  0  0  0  0  0  0  0  0  0
   -7.0412    0.6863    0.0000 C   0  0  0  0  0  0  0  0  0  0  0  0
   -7.8617    0.6001    0.0000 C   0  0  0  0  0  0  0  0  0  0  0  0
   -8.1972   -0.1536    0.0000 C   0  0  0  0  0  0  0  0  0  0  0  0
   -7.7123   -0.8210    0.0000 C   0  0  0  0  0  0  0  0  0  0  0  0
   -6.8918   -0.7348    0.0000 C   0  0  0  0  0  0  0  0  0  0  0  0
   -4.1357    1.5225    0.0000 C   0  0  0  0  0  0  0  0  0  0  0  0
   -3.3152    1.6087    0.0000 C   0  0  0  0  0  0  0  0  0  0  0  0
   -2.9796    2.3624    0.0000 C   0  0  0  0  0  0  0  0  0  0  0  0
   -3.4645    3.0298    0.0000 C   0  0  0  0  0  0  0  0  0  0  0  0
   -4.2850    2.9436    0.0000 C   0  0  0  0  0  0  0  0  0  0  0  0
   -4.2081   -0.6956    0.0000 S   0  0  0  0  0  0  0  0  0  0  0  0
   -3.4012   -0.5241    0.0000 C   0  0  0  0  0  0  0  0  0  0  0  0
   -3.3149    0.2963    0.0000 C   0  0  0  0  0  0  0  0  0  0  0  0
   -4.0686    0.6319    0.0000 C   0  0  0  0  0  0  0  0  0  0  0  0
  1  2  1  0  0  0  0
  1  5  1  0  0  0  0
  2  3  1  0  0  0  0
  3  4  1  0  0  0  0
  3 11  1  0  0  0  0
  4  5  1  0  0  0  0
  4 12  1  0  0  0  0
  6  7  1  0  0  0  0
  6  8  1  0  0  0  0
  6 13  1  0  0  0  0
  7 10  1  0  0  0  0
  7 14  1  0  0  0  0
  8  9  1  0  0  0  0
  9 10  1  0  0  0  0
 11 15  2  0  0  0  0
 11 19  1  0  0  0  0
 12 25  2  0  0  0  0
 12 29  1  0  0  0  0
 13 20  2  0  0  0  0
 13 24  1  0  0  0  0
 14 30  1  0  0  0  0
 14 33  2  0  0  0  0
 15 16  1  0  0  0  0
 16 17  2  0  0  0  0
 17 18  1  0  0  0  0
 18 19  2  0  0  0  0
 19  6  1  0  0  0  0
 20 21  1  0  0  0  0
 20  3  1  0  0  0  0
 21 22  2  0  0  0  0
 22 23  1  0  0  0  0
 23 24  2  0  0  0  0
 25 26  1  0  0  0  0
 25  7  1  0  0  0  0
 26 27  2  0  0  0  0
 27 28  1  0  0  0  0
 28 29  2  0  0  0  0
 30 31  1  0  0  0  0
 31 32  2  0  0  0  0
 32 33  1  0  0  0  0
 33  4  1  0  0  0  0
M  END
43
 

 53 61  0  0  0  0  0  0  0  0999 V2000
    2.5339    2.9464    0.0000 C   0  0  0  0  0  0  0  0  0  0  0  0
    2.1214    3.6609    0.0000 C   0  0  0  0  0  0  0  0  0  0  0  0
    1.2964    3.6609    0.0000 C   0  0  0  0  0  0  0  0  0  0  0  0
    0.8839    2.9464    0.0000 C   0  0  0  0  0  0  0  0  0  0  0  0
    1.2964    2.2320    0.0000 C   0  0  0  0  0  0  0  0  0  0  0  0
    2.1214    2.2320    0.0000 C   0  0  0  0  0  0  0  0  0  0  0  0
    3.1036    2.2320    0.0000 C   0  0  3  0  0  0  0  0  0  0  0  0
    3.1306    1.5248    0.0000 C   0  0  3  0  0  0  0  0  0  0  0  0
    2.1927    1.5641    0.0000 C   0  0  0  0  0  0  0  0  0  0  0  0
    2.6052    0.8496    0.0000 C   0  0  0  0  0  0  0  0  0  0  0  0
    2.1927    0.1351    0.0000 C   0  0  0  0  0  0  0  0  0  0  0  0
    1.3677    0.1351    0.0000 C   0  0  0  0  0  0  0  0  0  0  0  0
    0.9552    0.8496    0.0000 C   0  0  0  0  0  0  0  0  0  0  0  0
    1.3677    1.5641    0.0000 C   0  0  0  0  0  0  0  0  0  0  0  0
    3.9286    2.2320    0.0000 C   0  0  3  0  0  0  0  0  0  0  0  0
    3.9556    1.5248    0.0000 C   0  0  3  0  0  0  0  0  0  0  0  0
    4.5252    0.8103    0.0000 C   0  0  0  0  0  0  0  0  0  0  0  0
    4.9377    1.5248    0.0000 C   0  0  0  0  0  0  0  0  0  0  0  0
    4.8665    2.1927    0.0000 C   0  0  0  0  0  0  0  0  0  0  0  0
    4.4540    2.9071    0.0000 C   0  0  0  0  0  0  0  0  0  0  0  0
    2.8486    3.0165    0.0000 C   0  0  0  0  0  0  0  0  0  0  0  0
    3.5161    3.5015    0.0000 O   0  0  0  0  0  0  0  0  0  0  0  0
    4.1835    3.0166    0.0000 C   0  0  0  0  0  0  0  0  0  0  0  0
    4.5252   -0.0147    0.0000 C   0  0  0  0  0  0  0  0  0  0  0  0
    5.2397   -0.4272    0.0000 O   0  0  0  0  0  0  0  0  0  0  0  0
    5.2397   -1.2522    0.0000 C   0  0  3  0  0  0  0  0  0  0  0  0
    5.9541   -1.6647    0.0000 C   0  0  0  0  0  0  0  0  0  0  0  0
    4.5252   -1.6647    0.0000 C   0  0  0  0  0  0  0  0  0  0  0  0
    6.6686   -1.2522    0.0000 C   0  0  0  0  0  0  0  0  0  0  0  0
    5.6915    2.1927    0.0000 O   0  0  0  0  0  0  0  0  0  0  0  0
    6.1040    2.9071    0.0000 C   0  0  0  0  0  0  0  0  0  0  0  0
    6.9290    2.9071    0.0000 C   0  0  0  0  0  0  0  0  0  0  0  0
    7.3415    3.6216    0.0000 C   0  0  0  0  0  0  0  0  0  0  0  0
    7.3415    2.1927    0.0000 C   0  0  0  0  0  0  0  0  0  0  0  0
    8.1665    2.1926    0.0000 C   0  0  0  0  0  0  0  0  0  0  0  0
    8.5790    2.9071    0.0000 C   0  0  0  0  0  0  0  0  0  0  0  0
    8.1665    3.6216    0.0000 C   0  0  0  0  0  0  0  0  0  0  0  0
    8.5790    4.3361    0.0000 O   0  0  0  0  0  0  0  0  0  0  0  0
    8.5790    1.4782    0.0000 O   0  0  0  0  0  0  0  0  0  0  0  0
    9.4040    4.3360    0.0000 C   0  0  0  0  0  0  0  0  0  0  0  0
    9.4040    1.4782    0.0000 C   0  0  0  0  0  0  0  0  0  0  0  0
    9.8165    5.0505    0.0000 C   0  0  0  0  0  0  0  0  0  0  0  0
    9.8165    0.7637    0.0000 C   0  0  0  0  0  0  0  0  0  0  0  0
    9.4040    0.0492    0.0000 C   0  0  0  0  0  0  0  0  0  0  0  0
    9.8165   -0.6653    0.0000 C   0  0  0  0  0  0  0  0  0  0  0  0
   10.6415   -0.6653    0.0000 C   0  0  0  0  0  0  0  0  0  0  0  0
   11.0540    0.0492    0.0000 C   0  0  0  0  0  0  0  0  0  0  0  0
   10.6415    0.7637    0.0000 C   0  0  0  0  0  0  0  0  0  0  0  0
   10.6415    5.0505    0.0000 C   0  0  0  0  0  0  0  0  0  0  0  0
   11.0540    5.7650    0.0000 C   0  0  0  0  0  0  0  0  0  0  0  0
   10.6415    6.4795    0.0000 C   0  0  0  0  0  0  0  0  0  0  0  0
    9.8165    6.4795    0.0000 C   0  0  0  0  0  0  0  0  0  0  0  0
    9.4040    5.7650    0.0000 C   0  0  0  0  0  0  0  0  0  0  0  0
  1  2  2  0  0  0  0
  1  6  1  0  0  0  0
  1  7  1  0  0  0  0
  2  3  1  0  0  0  0
  3  4  2  0  0  0  0
  4  5  1  0  0  0  0
  5  6  2  0  0  0  0
  6  8  1  0  0  0  0
  7  9  1  0  0  0  0
  7 15  1  0  0  0  0
  7 21  1  0  0  0  0
  8 16  1  0  0  0  0
  9 14  2  0  0  0  0
  9 10  1  0  0  0  0
 10 11  2  0  0  0  0
 10  8  1  0  0  0  0
 11 12  1  0  0  0  0
 12 13  2  0  0  0  0
 13 14  1  0  0  0  0
 15 23  1  0  0  0  0
 16 19  1  0  0  0  0
 17 18  2  0  0  0  0
 17 16  1  0  0  0  0
 17 24  1  0  0  0  0
 18 15  1  0  0  0  0
 19 20  2  0  0  0  0
 19 30  1  0  0  0  0
 20 15  1  0  0  0  0
 21 22  1  0  0  0  0
 22 23  1  0  0  0  0
 24 25  1  0  0  0  0
 25 26  1  0  0  0  0
 26 27  1  0  0  0  0
 26 28  1  0  0  0  0
 27 29  1  0  0  0  0
 30 31  1  0  0  0  0
 31 32  1  0  0  0  0
 32 34  2  0  0  0  0
 33 37  2  0  0  0  0
 33 32  1  0  0  0  0
 34 35  1  0  0  0  0
 35 36  2  0  0  0  0
 35 39  1  0  0  0  0
 36 37  1  0  0  0  0
 37 38  1  0  0  0  0
 38 40  1  0  0  0  0
 39 41  1  0  0  0  0
 40 42  1  0  0  0  0
 41 43  1  0  0  0  0
 42 49  2  0  0  0  0
 42 53  1  0  0  0  0
 43 44  2  0  0  0  0
 43 48  1  0  0  0  0
 44 45  1  0  0  0  0
 45 46  2  0  0  0  0
 46 47  1  0  0  0  0
 47 48  2  0  0  0  0
 49 50  1  0  0  0  0
 50 51  2  0  0  0  0
 51 52  1  0  0  0  0
 52 53  2  0  0  0  0
M  END
44
 

 62 68  0  0  0  0  0  0  0  0999 V2000
    3.8739    3.0261    0.0000 C   0  0  0  0  0  0  0  0  0  0  0  0
    3.4614    2.3116    0.0000 C   0  0  3  0  0  0  0  0  0  0  0  0
    3.8739    1.5971    0.0000 C   0  0  0  0  0  0  0  0  0  0  0  0
    5.1114    2.3116    0.0000 C   0  0  0  0  0  0  0  0  0  0  0  0
    6.7013    2.9801    0.0000 C   0  0  0  0  0  0  0  0  0  0  0  0
    6.1180    3.5634    0.0000 C   0  0  3  0  0  0  0  0  0  0  0  0
    5.2961    3.6353    0.0000 C   0  0  0  0  0  0  0  0  0  0  0  0
    4.6989    3.0260    0.0000 C   0  0  0  0  0  0  0  0  0  0  0  0
    4.7555    1.6175    0.0000 C   0  0  3  0  0  0  0  0  0  0  0  0
    5.5032    1.2689    0.0000 C   0  0  3  0  0  0  0  0  0  0  0  0
    6.3000    1.4824    0.0000 C   0  0  3  0  0  0  0  0  0  0  0  0
    6.7732    2.1581    0.0000 C   0  0  3  0  0  0  0  0  0  0  0  0
    5.8259    2.7241    0.0000 C   0  0  0  0  0  0  0  0  0  0  0  0
    5.8259    1.8991    0.0000 C   0  0  0  0  0  0  0  0  0  0  0  0
    3.4614    3.7405    0.0000 C   0  0  0  0  0  0  0  0  0  0  0  0
    6.4666    4.3111    0.0000 O   0  0  0  0  0  0  0  0  0  0  0  0
    7.2885    4.3831    0.0000 C   0  0  0  0  0  0  0  0  0  0  0  0
    7.6371    5.1308    0.0000 C   0  0  0  0  0  0  0  0  0  0  0  0
    7.7617    3.7073    0.0000 O   0  0  0  0  0  0  0  0  0  0  0  0
    7.4491    3.3287    0.0000 O   0  0  0  0  0  0  0  0  0  0  0  0
    4.3430    0.9030    0.0000 O   0  0  0  0  0  0  0  0  0  0  0  0
    6.6487    0.7347    0.0000 C   0  0  3  0  0  0  0  0  0  0  0  0
    7.4705    0.6627    0.0000 C   0  0  3  0  0  0  0  0  0  0  0  0
    7.9438    1.3385    0.0000 C   0  0  0  0  0  0  0  0  0  0  0  0
    7.5951    2.0862    0.0000 C   0  0  3  0  0  0  0  0  0  0  0  0
    6.5767   -0.0872    0.0000 C   0  0  0  0  0  0  0  0  0  0  0  0
    7.3986   -0.1591    0.0000 O   0  0  0  0  0  0  0  0  0  0  0  0
    6.2362    0.0202    0.0000 O   0  0  0  0  0  0  0  0  0  0  0  0
    6.5848   -0.7275    0.0000 C   0  0  0  0  0  0  0  0  0  0  0  0
    2.6364    2.3116    0.0000 O   0  0  0  0  0  0  0  0  0  0  0  0
    2.2239    1.5971    0.0000 C   0  0  0  0  0  0  0  0  0  0  0  0
    1.3989    1.5971    0.0000 C   0  0  3  0  0  0  0  0  0  0  0  0
    2.6364    0.8826    0.0000 O   0  0  0  0  0  0  0  0  0  0  0  0
    0.9864    0.8826    0.0000 C   0  0  3  0  0  0  0  0  0  0  0  0
    0.9864    2.3116    0.0000 O   0  0  0  0  0  0  0  0  0  0  0  0
    0.1614    0.8826    0.0000 C   0  0  0  0  0  0  0  0  0  0  0  0
    1.3989    0.1681    0.0000 N   0  0  0  0  0  0  0  0  0  0  0  0
   -0.2511    1.5971    0.0000 C   0  0  0  0  0  0  0  0  0  0  0  0
   -1.0761    1.5971    0.0000 C   0  0  0  0  0  0  0  0  0  0  0  0
   -1.4886    0.8826    0.0000 C   0  0  0  0  0  0  0  0  0  0  0  0
   -1.0761    0.1681    0.0000 C   0  0  0  0  0  0  0  0  0  0  0  0
   -0.2511    0.1681    0.0000 C   0  0  0  0  0  0  0  0  0  0  0  0
    0.9864   -0.5463    0.0000 C   0  0  0  0  0  0  0  0  0  0  0  0
    1.3989   -1.2608    0.0000 C   0  0  0  0  0  0  0  0  0  0  0  0
    0.1614   -0.5463    0.0000 O   0  0  0  0  0  0  0  0  0  0  0  0
    0.9864   -1.9753    0.0000 C   0  0  0  0  0  0  0  0  0  0  0  0
    1.3989   -2.6898    0.0000 C   0  0  0  0  0  0  0  0  0  0  0  0
    2.2239   -2.6898    0.0000 C   0  0  0  0  0  0  0  0  0  0  0  0
    2.6364   -1.9753    0.0000 C   0  0  0  0  0  0  0  0  0  0  0  0
    2.2239   -1.2608    0.0000 C   0  0  0  0  0  0  0  0  0  0  0  0
    6.1116   -1.4033    0.0000 C   0  0  0  0  0  0  0  0  0  0  0  0
    7.4067   -0.7994    0.0000 O   0  0  0  0  0  0  0  0  0  0  0  0
    8.0683    2.7620    0.0000 O   0  0  0  0  0  0  0  0  0  0  0  0
    5.5032    0.4439    0.0000 O   0  0  0  0  0  0  0  0  0  0  0  0
    4.7887    0.0314    0.0000 C   0  0  0  0  0  0  0  0  0  0  0  0
    4.7887   -0.7936    0.0000 C   0  0  0  0  0  0  0  0  0  0  0  0
    4.0742    0.4439    0.0000 O   0  0  0  0  0  0  0  0  0  0  0  0
    4.0742   -1.2061    0.0000 C   0  0  0  0  0  0  0  0  0  0  0  0
    4.0742   -2.0311    0.0000 C   0  0  0  0  0  0  0  0  0  0  0  0
    4.7887   -2.4436    0.0000 C   0  0  0  0  0  0  0  0  0  0  0  0
    5.5031   -2.0311    0.0000 C   0  0  0  0  0  0  0  0  0  0  0  0
    5.5031   -1.2061    0.0000 C   0  0  0  0  0  0  0  0  0  0  0  0
  1  2  1  0  0  0  0
  1  8  2  0  0  0  0
  1 15  1  0  0  0  0
  2  3  1  0  0  0  0
  2 30  1  0  0  0  0
  3  9  1  0  0  0  0
  4  8  1  0  0  0  0
  4 13  1  0  0  0  0
  4 14  1  0  0  0  0
  5  6  1  0  0  0  0
  5 20  2  0  0  0  0
  6  7  1  0  0  0  0
  6 16  1  0  0  0  0
  7  8  1  0  0  0  0
  9 10  1  0  0  0  0
  9  4  1  0  0  0  0
  9 21  1  0  0  0  0
 10 11  1  0  0  0  0
 10 54  1  0  0  0  0
 11 12  1  0  0  0  0
 11 22  1  0  0  0  0
 12  5  1  0  0  0  0
 12 25  1  0  0  0  0
 16 17  1  0  0  0  0
 17 18  1  0  0  0  0
 17 19  2  0  0  0  0
 22 23  1  0  0  0  0
 22 26  1  0  0  0  0
 22 28  1  0  0  0  0
 23 24  1  0  0  0  0
 24 25  1  0  0  0  0
 25 53  1  0  0  0  0
 26 27  1  0  0  0  0
 27 23  1  0  0  0  0
 28 29  1  0  0  0  0
 29 51  1  0  0  0  0
 29 52  2  0  0  0  0
 30 31  1  0  0  0  0
 31 32  1  0  0  0  0
 31 33  2  0  0  0  0
 32 34  1  0  0  0  0
 32 35  1  0  0  0  0
 34 36  1  0  0  0  0
 34 37  1  0  0  0  0
 36 38  2  0  0  0  0
 36 42  1  0  0  0  0
 37 43  1  0  0  0  0
 38 39  1  0  0  0  0
 39 40  2  0  0  0  0
 40 41  1  0  0  0  0
 41 42  2  0  0  0  0
 43 44  1  0  0  0  0
 43 45  2  0  0  0  0
 44 46  2  0  0  0  0
 44 50  1  0  0  0  0
 46 47  1  0  0  0  0
 47 48  2  0  0  0  0
 48 49  1  0  0  0  0
 49 50  2  0  0  0  0
 54 55  1  0  0  0  0
 55 56  1  0  0  0  0
 55 57  2  0  0  0  0
 56 58  2  0  0  0  0
 56 62  1  0  0  0  0
 58 59  1  0  0  0  0
 59 60  2  0  0  0  0
 60 61  1  0  0  0  0
 61 62  2  0  0  0  0
M  END
45
 

 45 51  0  0  0  0  0  0  0  0999 V2000
    2.8482   -2.0944    0.0000 C   0  0  0  0  0  0  0  0  0  0  0  0
    2.4357   -2.8089    0.0000 C   0  0  3  0  0  0  0  0  0  0  0  0
    2.8482   -3.5234    0.0000 C   0  0  3  0  0  0  0  0  0  0  0  0
    3.6732   -3.5234    0.0000 C   0  0  3  0  0  0  0  0  0  0  0  0
    4.0857   -2.8089    0.0000 C   0  0  3  0  0  0  0  0  0  0  0  0
    3.6732   -2.0945    0.0000 C   0  0  0  0  0  0  0  0  0  0  0  0
    4.0857   -4.2379    0.0000 C   0  0  3  0  0  0  0  0  0  0  0  0
    4.9107   -4.2379    0.0000 C   0  0  0  0  0  0  0  0  0  0  0  0
    5.3232   -3.5234    0.0000 C   0  0  3  0  0  0  0  0  0  0  0  0
    4.9107   -2.8089    0.0000 C   0  0  3  0  0  0  0  0  0  0  0  0
    2.4357   -1.3800    0.0000 C   0  0  0  0  0  0  0  0  0  0  0  0
    1.6107   -1.3800    0.0000 O   0  0  0  0  0  0  0  0  0  0  0  0
    1.1982   -0.6655    0.0000 C   0  0  0  0  0  0  0  0  0  0  0  0
    0.3732   -0.6655    0.0000 O   0  0  0  0  0  0  0  0  0  0  0  0
    1.6107    0.0490    0.0000 C   0  0  0  0  0  0  0  0  0  0  0  0
    1.1982    0.7634    0.0000 C   0  0  0  0  0  0  0  0  0  0  0  0
    1.6107    1.4779    0.0000 C   0  0  0  0  0  0  0  0  0  0  0  0
    1.1982    2.1924    0.0000 C   0  0  0  0  0  0  0  0  0  0  0  0
    0.3732    2.1924    0.0000 C   0  0  0  0  0  0  0  0  0  0  0  0
   -0.0393    1.4779    0.0000 C   0  0  0  0  0  0  0  0  0  0  0  0
    0.3732    0.7635    0.0000 C   0  0  0  0  0  0  0  0  0  0  0  0
    2.2962   -4.1365    0.0000 C   0  0  0  0  0  0  0  0  0  0  0  0
    1.5425   -3.8009    0.0000 C   0  0  0  0  0  0  0  0  0  0  0  0
    1.6287   -2.9805    0.0000 C   0  0  0  0  0  0  0  0  0  0  0  0
   -0.0393    2.9069    0.0000 O   0  0  0  0  0  0  0  0  0  0  0  0
    1.6107    2.9069    0.0000 O   0  0  0  0  0  0  0  0  0  0  0  0
    1.1982    3.6213    0.0000 C   0  0  0  0  0  0  0  0  0  0  0  0
    2.0232   -2.0944    0.0000 O   0  0  0  0  0  0  0  0  0  0  0  0
    1.0156   -2.4285    0.0000 O   0  0  0  0  0  0  0  0  0  0  0  0
    0.8281   -4.2134    0.0000 C   0  0  0  0  0  0  0  0  0  0  0  0
    3.6732   -4.9524    0.0000 C   0  0  0  0  0  0  0  0  0  0  0  0
    5.3232   -2.0945    0.0000 O   0  0  0  0  0  0  0  0  0  0  0  0
    6.1482   -3.5234    0.0000 O   0  0  0  0  0  0  0  0  0  0  0  0
    5.8673   -2.7368    0.0000 C   0  0  3  0  0  0  0  0  0  0  0  0
    4.6357   -3.3270    0.0000 O   0  0  0  0  0  0  0  0  0  0  0  0
    6.5821   -2.3248    0.0000 C   0  0  0  0  0  0  0  0  0  0  0  0
    6.5821   -1.4998    0.0000 C   0  0  0  0  0  0  0  0  0  0  0  0
    7.2965   -1.0873    0.0000 C   0  0  0  0  0  0  0  0  0  0  0  0
    7.2965   -0.2622    0.0000 C   0  0  0  0  0  0  0  0  0  0  0  0
    6.5821    0.1503    0.0000 C   0  0  0  0  0  0  0  0  0  0  0  0
    5.8676   -0.2622    0.0000 C   0  0  0  0  0  0  0  0  0  0  0  0
    5.8676   -1.0873    0.0000 C   0  0  0  0  0  0  0  0  0  0  0  0
    5.7357   -4.2379    0.0000 C   0  0  0  0  0  0  0  0  0  0  0  0
    6.5607   -4.2379    0.0000 C   0  0  0  0  0  0  0  0  0  0  0  0
    5.3232   -4.9524    0.0000 C   0  0  0  0  0  0  0  0  0  0  0  0
  1  2  1  0  0  0  0
  1  6  2  0  0  0  0
  1 11  1  0  0  0  0
  2  3  1  0  0  0  0
  2 24  1  0  0  0  0
  2 28  1  0  0  0  0
  3  4  1  0  0  0  0
  3 22  1  0  0  0  0
  4  5  1  0  0  0  0
  4  7  1  0  0  0  0
  4 35  1  0  0  0  0
  5  6  1  0  0  0  0
  5 10  1  0  0  0  0
  7  8  1  0  0  0  0
  7 31  1  0  0  0  0
  8  9  1  0  0  0  0
  9 10  1  0  0  0  0
  9 33  1  0  0  0  0
  9 43  1  0  0  0  0
 10 32  1  0  0  0  0
 11 12  1  0  0  0  0
 12 13  1  0  0  0  0
 13 14  2  0  0  0  0
 13 15  1  0  0  0  0
 15 16  1  0  0  0  0
 16 17  2  0  0  0  0
 16 21  1  0  0  0  0
 17 18  1  0  0  0  0
 18 19  2  0  0  0  0
 18 26  1  0  0  0  0
 19 20  1  0  0  0  0
 19 25  1  0  0  0  0
 20 21  2  0  0  0  0
 22 23  2  0  0  0  0
 23 24  1  0  0  0  0
 23 30  1  0  0  0  0
 24 29  2  0  0  0  0
 26 27  1  0  0  0  0
 32 34  1  0  0  0  0
 34 33  1  0  0  0  0
 34 36  1  0  0  0  0
 35 34  1  0  0  0  0
 36 37  1  0  0  0  0
 37 38  2  0  0  0  0
 37 42  1  0  0  0  0
 38 39  1  0  0  0  0
 39 40  2  0  0  0  0
 40 41  1  0  0  0  0
 41 42  2  0  0  0  0
 43 44  1  0  0  0  0
 43 45  2  0  0  0  0
M  END
46
 

 37 43  0  0  0  0  0  0  0  0999 V2000
    5.9812   -2.8339    0.0000 C   0  0  0  0  0  0  0  0  0  0  0  0
    5.3138   -3.3189    0.0000 C   0  0  0  0  0  0  0  0  0  0  0  0
    5.5687   -4.1034    0.0000 C   0  0  0  0  0  0  0  0  0  0  0  0
    6.3938   -4.1034    0.0000 C   0  0  3  0  0  0  0  0  0  0  0  0
    6.6487   -3.3189    0.0000 C   0  0  3  0  0  0  0  0  0  0  0  0
    6.8482   -4.7919    0.0000 C   0  0  3  0  0  0  0  0  0  0  0  0
    7.6699   -4.8659    0.0000 C   0  0  3  0  0  0  0  0  0  0  0  0
    8.2400   -4.2696    0.0000 C   0  0  3  0  0  0  0  0  0  0  0  0
    8.1293   -3.4521    0.0000 C   0  0  0  0  0  0  0  0  0  0  0  0
    7.4211   -3.0289    0.0000 C   0  0  0  0  0  0  0  0  0  0  0  0
    6.4251   -5.5001    0.0000 C   0  0  0  0  0  0  0  0  0  0  0  0
    7.5627   -4.3794    0.0000 C   0  0  3  0  0  0  0  0  0  0  0  0
    8.4657   -5.1455    0.0000 C   0  0  3  0  0  0  0  0  0  0  0  0
    8.0544   -5.3255    0.0000 C   0  0  0  0  0  0  0  0  0  0  0  0
    8.0970   -6.1020    0.0000 C   0  0  0  0  0  0  0  0  0  0  0  0
    6.7915   -4.1158    0.0000 N   0  0  3  0  0  0  0  0  0  0  0  0
    7.4588   -3.7504    0.0000 C   0  0  0  0  0  0  0  0  0  0  0  0
    9.2652   -4.9417    0.0000 C   0  0  0  0  0  0  0  0  0  0  0  0
    7.2875   -5.5969    0.0000 C   0  0  0  0  0  0  0  0  0  0  0  0
    9.8414   -5.5320    0.0000 C   0  0  0  0  0  0  0  0  0  0  0  0
    9.4883   -4.1474    0.0000 C   0  0  0  0  0  0  0  0  0  0  0  0
    5.6002   -5.4878    0.0000 C   0  0  3  0  0  0  0  0  0  0  0  0
    5.1770   -6.1960    0.0000 C   0  0  0  0  0  0  0  0  0  0  0  0
    4.3521   -6.1836    0.0000 C   0  0  3  0  0  0  0  0  0  0  0  0
    4.3398   -7.0086    0.0000 C   0  0  0  0  0  0  0  0  0  0  0  0
    3.6871   -7.5132    0.0000 O   0  0  0  0  0  0  0  0  0  0  0  0
    2.8856   -7.3176    0.0000 C   0  0  3  0  0  0  0  0  0  0  0  0
    2.5389   -6.5690    0.0000 C   0  0  0  0  0  0  0  0  0  0  0  0
    2.9079   -5.8312    0.0000 C   0  0  0  0  0  0  0  0  0  0  0  0
    3.7149   -5.6597    0.0000 C   0  0  3  0  0  0  0  0  0  0  0  0
    5.1984   -4.7672    0.0000 O   0  0  0  0  0  0  0  0  0  0  0  0
    4.3734   -4.7672    0.0000 C   0  0  0  0  0  0  0  0  0  0  0  0
    3.9609   -4.0527    0.0000 C   0  0  0  0  0  0  0  0  0  0  0  0
    4.6894   -5.4176    0.0000 C   0  0  0  0  0  0  0  0  0  0  0  0
    2.3617   -7.9548    0.0000 C   0  0  0  0  0  0  0  0  0  0  0  0
    3.6513   -6.6575    0.0000 O   0  0  0  0  0  0  0  0  0  0  0  0
    3.9609   -5.4817    0.0000 O   0  0  0  0  0  0  0  0  0  0  0  0
  1  2  1  0  0  0  0
  1  5  1  0  0  0  0
  2  3  1  0  0  0  0
  3  4  1  0  0  0  0
  4  5  1  0  0  0  0
  4  6  1  0  0  0  0
  5 16  1  0  0  0  0
  6  7  1  0  0  0  0
  6 11  1  0  0  0  0
  6 12  1  0  0  0  0
  7  8  1  0  0  0  0
  7 14  1  0  0  0  0
  7 19  1  0  0  0  0
  8  9  1  0  0  0  0
  9 10  1  0  0  0  0
 10  5  1  0  0  0  0
 11 22  1  0  0  0  0
 12 13  1  0  0  0  0
 13 18  1  0  0  0  0
 14 15  1  0  0  0  0
 15 13  1  0  0  0  0
 16 17  1  0  0  0  0
 16 12  1  0  0  0  0
 17  8  1  0  0  0  0
 18 20  1  0  0  0  0
 18 21  1  0  0  0  0
 22 23  1  0  0  0  0
 22 31  1  0  0  0  0
 23 24  1  0  0  0  0
 24 25  1  0  0  0  0
 24 34  1  0  0  0  0
 25 26  1  0  0  0  0
 26 27  1  0  0  0  0
 27 28  1  0  0  0  0
 27 35  1  0  0  0  0
 28 29  1  0  0  0  0
 29 30  1  0  0  0  0
 30 24  1  0  0  0  0
 30 36  1  0  0  0  0
 31 32  1  0  0  0  0
 32 33  1  0  0  0  0
 32 37  2  0  0  0  0
 36 27  1  0  0  0  0
M  END
47
 

 26 31  0  0  0  0  0  0  0  0999 V2000
   -1.1489    2.5610    0.0000 C   0  0  0  0  0  0  0  0  0  0  0  0
   -1.7133    3.0841    0.0000 C   0  0  3  0  0  0  0  0  0  0  0  0
   -1.9008    3.7838    0.0000 C   0  0  3  0  0  0  0  0  0  0  0  0
   -1.6262    4.4647    0.0000 O   0  0  0  0  0  0  0  0  0  0  0  0
   -2.6623    3.6097    0.0000 N   0  0  3  0  0  0  0  0  0  0  0  0
   -3.2838    2.8005    0.0000 C   0  0  3  0  0  0  0  0  0  0  0  0
   -2.7712    2.1895    0.0000 C   0  0  0  0  0  0  0  0  0  0  0  0
   -2.5492    2.9552    0.0000 C   0  0  3  0  0  0  0  0  0  0  0  0
   -3.3300    3.4372    0.0000 C   0  0  3  0  0  0  0  0  0  0  0  0
   -3.8912    3.0315    0.0000 C   0  0  3  0  0  0  0  0  0  0  0  0
   -3.6093    2.1628    0.0000 O   0  0  0  0  0  0  0  0  0  0  0  0
   -4.6606    3.1130    0.0000 C   0  0  3  0  0  0  0  0  0  0  0  0
   -4.1243    2.4962    0.0000 C   0  0  3  0  0  0  0  0  0  0  0  0
   -4.5654    3.9261    0.0000 C   0  0  3  0  0  0  0  0  0  0  0  0
   -5.2904    4.3402    0.0000 O   0  0  0  0  0  0  0  0  0  0  0  0
   -3.9288    4.3819    0.0000 C   0  0  0  0  0  0  0  0  0  0  0  0
   -3.1651    4.1745    0.0000 C   0  0  3  0  0  0  0  0  0  0  0  0
   -4.5491    1.7891    0.0000 N   0  0  0  0  0  0  0  0  0  0  0  0
   -5.3530    1.9746    0.0000 C   0  0  0  0  0  0  0  0  0  0  0  0
   -5.4250    2.7964    0.0000 C   0  0  0  0  0  0  0  0  0  0  0  0
   -6.0288    1.5013    0.0000 C   0  0  0  0  0  0  0  0  0  0  0  0
   -6.7765    1.8499    0.0000 C   0  0  0  0  0  0  0  0  0  0  0  0
   -6.8485    2.6717    0.0000 C   0  0  0  0  0  0  0  0  0  0  0  0
   -6.1727    3.1450    0.0000 C   0  0  0  0  0  0  0  0  0  0  0  0
   -4.2267    1.0297    0.0000 C   0  0  0  0  0  0  0  0  0  0  0  0
   -0.3650    2.8182    0.0000 C   0  0  0  0  0  0  0  0  0  0  0  0
  1 26  1  0  0  0  0
  2  1  1  0  0  0  0
  2  8  1  0  0  0  0
  3  2  1  0  0  0  0
  4  3  1  0  0  0  0
  5  3  1  0  0  0  0
  5 17  1  0  0  0  0
  6  5  1  0  0  0  0
  6 13  1  0  0  0  0
  7  6  1  0  0  0  0
  8  7  1  0  0  0  0
  9  8  1  0  0  0  0
  9 17  1  0  0  0  0
 10  9  1  0  0  0  0
 11 10  1  0  0  0  0
 12 10  1  0  0  0  0
 12 20  1  0  0  0  0
 13 12  1  0  0  0  0
 13 18  1  0  0  0  0
 14 12  1  0  0  0  0
 15 14  1  0  0  0  0
 16 14  1  0  0  0  0
 17 16  1  0  0  0  0
 18 19  1  0  0  0  0
 18 25  1  0  0  0  0
 19 21  2  0  0  0  0
 20 24  2  0  0  0  0
 20 19  1  0  0  0  0
 21 22  1  0  0  0  0
 22 23  2  0  0  0  0
 23 24  1  0  0  0  0
M  END
48
 

 34 39  0  0  0  0  0  0  0  0999 V2000
   -2.5916    0.6462    0.0000 C   0  0  3  0  0  0  0  0  0  0  0  0
   -3.4316    0.6858    0.0000 C   0  0  0  0  0  0  0  0  0  0  0  0
   -3.7327   -0.0868    0.0000 C   0  0  3  0  0  0  0  0  0  0  0  0
   -3.0804   -0.5921    0.0000 C   0  0  3  0  0  0  0  0  0  0  0  0
   -2.3230   -0.1778    0.0000 C   0  0  3  0  0  0  0  0  0  0  0  0
   -1.5011   -0.0234    0.0000 C   0  0  3  0  0  0  0  0  0  0  0  0
   -1.2098    0.7390    0.0000 C   0  0  3  0  0  0  0  0  0  0  0  0
   -1.9310    1.1777    0.0000 C   0  0  3  0  0  0  0  0  0  0  0  0
   -0.9529   -0.6319    0.0000 C   0  0  3  0  0  0  0  0  0  0  0  0
   -0.2147   -0.2171    0.0000 C   0  0  3  0  0  0  0  0  0  0  0  0
   -0.3714    0.6087    0.0000 C   0  0  3  0  0  0  0  0  0  0  0  0
   -1.4543   -1.3084    0.0000 C   0  0  3  0  0  0  0  0  0  0  0  0
   -2.2455   -1.0423    0.0000 O   0  0  0  0  0  0  0  0  0  0  0  0
   -1.8668   -0.5939    0.0000 C   0  0  0  0  0  0  0  0  0  0  0  0
   -2.8474    1.4305    0.0000 O   0  0  0  0  0  0  0  0  0  0  0  0
   -4.5278   -0.3068    0.0000 C   0  0  0  0  0  0  0  0  0  0  0  0
   -3.1458   -1.4145    0.0000 O   0  0  0  0  0  0  0  0  0  0  0  0
   -1.2071   -2.0955    0.0000 O   0  0  0  0  0  0  0  0  0  0  0  0
   -0.4074   -1.2508    0.0000 C   0  0  0  0  0  0  0  0  0  0  0  0
    0.4998    0.1954    0.0000 O   0  0  0  0  0  0  0  0  0  0  0  0
    0.1936   -0.9340    0.0000 C   0  0  0  0  0  0  0  0  0  0  0  0
    1.0186   -0.9388    0.0000 C   0  0  0  0  0  0  0  0  0  0  0  0
   -0.2231   -1.6461    0.0000 C   0  0  0  0  0  0  0  0  0  0  0  0
    0.2021    1.2017    0.0000 O   0  0  0  0  0  0  0  0  0  0  0  0
   -0.9267    1.5139    0.0000 O   0  0  0  0  0  0  0  0  0  0  0  0
   -1.9850    2.0009    0.0000 C   0  0  0  0  0  0  0  0  0  0  0  0
    1.0025    1.0015    0.0000 C   0  0  0  0  0  0  0  0  0  0  0  0
    1.5760    1.5945    0.0000 C   0  0  0  0  0  0  0  0  0  0  0  0
    1.2293    0.2083    0.0000 O   0  0  0  0  0  0  0  0  0  0  0  0
    2.3929    1.4791    0.0000 N   0  0  0  0  0  0  0  0  0  0  0  0
    2.7551    2.2203    0.0000 C   0  0  0  0  0  0  0  0  0  0  0  0
    2.1621    2.7938    0.0000 C   0  0  0  0  0  0  0  0  0  0  0  0
    1.4334    2.4071    0.0000 C   0  0  0  0  0  0  0  0  0  0  0  0
   -0.7042    0.1902    0.0000 O   0  0  0  0  0  0  0  0  0  0  0  0
  1  2  1  0  0  0  0
  1  5  1  0  0  0  0
  1  8  1  0  0  0  0
  1 15  1  0  0  0  0
  2  3  1  0  0  0  0
  3  4  1  0  0  0  0
  3 16  1  0  0  0  0
  4  5  1  0  0  0  0
  4 17  1  0  0  0  0
  5  6  1  0  0  0  0
  6  7  1  0  0  0  0
  6  9  1  0  0  0  0
  6 34  1  0  0  0  0
  7  8  1  0  0  0  0
  7 11  1  0  0  0  0
  7 25  1  0  0  0  0
  8 26  1  0  0  0  0
  9 10  1  0  0  0  0
  9 12  1  0  0  0  0
  9 19  1  0  0  0  0
 10 11  1  0  0  0  0
 10 20  1  0  0  0  0
 10 21  1  0  0  0  0
 11 24  1  0  0  0  0
 12 13  1  0  0  0  0
 12 14  1  0  0  0  0
 12 18  1  0  0  0  0
 13  5  1  0  0  0  0
 14  8  1  0  0  0  0
 21 22  1  0  0  0  0
 21 23  1  0  0  0  0
 24 27  1  0  0  0  0
 27 28  1  0  0  0  0
 27 29  2  0  0  0  0
 28 30  1  0  0  0  0
 28 33  2  0  0  0  0
 30 31  1  0  0  0  0
 31 32  2  0  0  0  0
 32 33  1  0  0  0  0
M  END
49
 

 25 31  0  0  0  0  0  0  0  0999 V2000
   -1.1129    0.8204    0.0000 C   0  0  0  0  0  0  0  0  0  0  0  0
   -1.8273    0.4079    0.0000 C   0  0  3  0  0  0  0  0  0  0  0  0
   -1.8273   -0.4170    0.0000 C   0  0  0  0  0  0  0  0  0  0  0  0
   -1.1129   -0.8295    0.0000 C   0  0  3  0  0  0  0  0  0  0  0  0
   -0.3984   -0.4170    0.0000 C   0  0  3  0  0  0  0  0  0  0  0  0
   -0.3984    0.4079    0.0000 C   0  0  3  0  0  0  0  0  0  0  0  0
    0.3160   -0.8295    0.0000 C   0  0  3  0  0  0  0  0  0  0  0  0
    1.0305   -0.4170    0.0000 C   0  0  0  0  0  0  0  0  0  0  0  0
    1.0305    0.4079    0.0000 C   0  0  3  0  0  0  0  0  0  0  0  0
    0.3160    0.8204    0.0000 C   0  0  3  0  0  0  0  0  0  0  0  0
    0.3160    1.6454    0.0000 C   0  0  0  0  0  0  0  0  0  0  0  0
    1.0305    2.0579    0.0000 C   0  0  3  0  0  0  0  0  0  0  0  0
    1.7449    1.6454    0.0000 C   0  0  3  0  0  0  0  0  0  0  0  0
    1.7449    0.8204    0.0000 C   0  0  0  0  0  0  0  0  0  0  0  0
   -0.0301   -0.1591    0.0000 C   0  0  3  0  0  0  0  0  0  0  0  0
    0.6783   -0.1519    0.0000 C   0  0  3  0  0  0  0  0  0  0  0  0
    1.0304   -1.2420    0.0000 O   0  0  0  0  0  0  0  0  0  0  0  0
   -0.8109   -1.6865    0.0000 C   0  0  0  0  0  0  0  0  0  0  0  0
    0.0140   -1.6865    0.0000 N   0  0  3  0  0  0  0  0  0  0  0  0
    2.5418    1.4319    0.0000 C   0  0  0  0  0  0  0  0  0  0  0  0
    2.1574    2.3599    0.0000 O   0  0  0  0  0  0  0  0  0  0  0  0
   -2.5418    0.8204    0.0000 O   0  0  0  0  0  0  0  0  0  0  0  0
    0.4907   -2.3599    0.0000 C   0  0  0  0  0  0  0  0  0  0  0  0
    0.5899    1.1739    0.0000 C   0  0  0  0  0  0  0  0  0  0  0  0
   -0.2069    1.3875    0.0000 O   0  0  0  0  0  0  0  0  0  0  0  0
  1  2  1  0  0  0  0
  1  6  1  0  0  0  0
  2  3  1  0  0  0  0
  2 22  1  0  0  0  0
  3  4  1  0  0  0  0
  4  5  1  0  0  0  0
  4 18  1  0  0  0  0
  5  6  1  0  0  0  0
  5  7  1  0  0  0  0
  6 10  1  0  0  0  0
  6 15  1  0  0  0  0
  7  8  1  0  0  0  0
  7 17  1  0  0  0  0
  8  9  1  0  0  0  0
  9 10  1  0  0  0  0
  9 14  1  0  0  0  0
 10 11  1  0  0  0  0
 11 12  1  0  0  0  0
 12 13  1  0  0  0  0
 13 14  1  0  0  0  0
 13 20  1  0  0  0  0
 13 21  1  0  0  0  0
 15 16  1  0  0  0  0
 15 19  1  0  0  0  0
 16  9  1  0  0  0  0
 16 24  1  0  0  0  0
 18 19  1  0  0  0  0
 19  7  1  0  0  0  0
 19 23  1  0  0  0  0
 24 12  1  0  0  0  0
 24 25  2  0  0  0  0
M  END
50
 

 68 79  0  0  0  0  0  0  0  0999 V2000
   -1.0804    6.4036    0.0000 C   0  0  0  0  0  0  0  0  0  0  0  0
   -1.7948    5.9911    0.0000 C   0  0  0  0  0  0  0  0  0  0  0  0
   -1.7948    5.1661    0.0000 C   0  0  0  0  0  0  0  0  0  0  0  0
   -1.0804    4.7536    0.0000 C   0  0  0  0  0  0  0  0  0  0  0  0
   -0.3659    5.1661    0.0000 C   0  0  0  0  0  0  0  0  0  0  0  0
   -0.3659    5.9911    0.0000 C   0  0  0  0  0  0  0  0  0  0  0  0
   -2.4079    4.6141    0.0000 O   0  0  0  0  0  0  0  0  0  0  0  0
   -2.0724    3.8604    0.0000 C   0  0  3  0  0  0  0  0  0  0  0  0
   -1.2519    3.9466    0.0000 C   0  0  3  0  0  0  0  0  0  0  0  0
   -2.4849    3.1459    0.0000 C   0  0  0  0  0  0  0  0  0  0  0  0
   -3.3099    3.1460    0.0000 C   0  0  0  0  0  0  0  0  0  0  0  0
   -3.7224    2.4315    0.0000 C   0  0  0  0  0  0  0  0  0  0  0  0
   -3.3100    1.7170    0.0000 C   0  0  0  0  0  0  0  0  0  0  0  0
   -2.4850    1.7170    0.0000 C   0  0  0  0  0  0  0  0  0  0  0  0
   -2.0724    2.4314    0.0000 C   0  0  0  0  0  0  0  0  0  0  0  0
   -0.8774    3.2115    0.0000 C   0  0  0  0  0  0  0  0  0  0  0  0
   -1.3268    2.5196    0.0000 C   0  0  0  0  0  0  0  0  0  0  0  0
   -0.9523    1.7845    0.0000 C   0  0  0  0  0  0  0  0  0  0  0  0
   -0.1284    1.7413    0.0000 C   0  0  0  0  0  0  0  0  0  0  0  0
    0.3210    2.4332    0.0000 C   0  0  0  0  0  0  0  0  0  0  0  0
   -0.0536    3.1683    0.0000 C   0  0  0  0  0  0  0  0  0  0  0  0
    0.4591    5.1661    0.0000 C   0  0  3  0  0  0  0  0  0  0  0  0
    1.1003    4.6469    0.0000 C   0  0  0  0  0  0  0  0  0  0  0  0
    1.7921    5.0962    0.0000 C   0  0  0  0  0  0  0  0  0  0  0  0
    1.5786    5.8931    0.0000 C   0  0  3  0  0  0  0  0  0  0  0  0
    0.7548    5.9363    0.0000 C   0  0  3  0  0  0  0  0  0  0  0  0
    0.3486    6.4036    0.0000 C   0  0  3  0  0  0  0  0  0  0  0  0
   -0.0639    7.1181    0.0000 C   0  0  0  0  0  0  0  0  0  0  0  0
    0.3486    7.8325    0.0000 C   0  0  0  0  0  0  0  0  0  0  0  0
   -0.0639    8.5470    0.0000 C   0  0  0  0  0  0  0  0  0  0  0  0
   -0.8889    8.5470    0.0000 C   0  0  0  0  0  0  0  0  0  0  0  0
   -1.3014    7.8325    0.0000 C   0  0  0  0  0  0  0  0  0  0  0  0
   -0.8889    7.1181    0.0000 C   0  0  0  0  0  0  0  0  0  0  0  0
    1.0101    6.7416    0.0000 C   0  0  0  0  0  0  0  0  0  0  0  0
    1.8159    6.9189    0.0000 C   0  0  0  0  0  0  0  0  0  0  0  0
    2.0652    7.7053    0.0000 C   0  0  0  0  0  0  0  0  0  0  0  0
    1.5088    8.3145    0.0000 C   0  0  0  0  0  0  0  0  0  0  0  0
    0.7031    8.1372    0.0000 C   0  0  0  0  0  0  0  0  0  0  0  0
    0.4538    7.3508    0.0000 C   0  0  0  0  0  0  0  0  0  0  0  0
   -1.3014    9.2615    0.0000 O   0  0  0  0  0  0  0  0  0  0  0  0
    1.7582    9.1009    0.0000 O   0  0  0  0  0  0  0  0  0  0  0  0
   -1.2939    7.2005    0.0000 O   0  0  0  0  0  0  0  0  0  0  0  0
   -3.7225    1.0025    0.0000 O   0  0  0  0  0  0  0  0  0  0  0  0
   -1.4016    1.0926    0.0000 O   0  0  0  0  0  0  0  0  0  0  0  0
    1.1448    2.3899    0.0000 O   0  0  0  0  0  0  0  0  0  0  0  0
    1.1434    3.8230    0.0000 C   0  0  0  0  0  0  0  0  0  0  0  0
    1.8785    3.4485    0.0000 C   0  0  0  0  0  0  0  0  0  0  0  0
    2.5704    3.8978    0.0000 C   0  0  0  0  0  0  0  0  0  0  0  0
    2.5272    4.7217    0.0000 C   0  0  0  0  0  0  0  0  0  0  0  0
    0.4515    3.3737    0.0000 O   0  0  0  0  0  0  0  0  0  0  0  0
    3.3673    3.6843    0.0000 O   0  0  0  0  0  0  0  0  0  0  0  0
    3.8166    4.3761    0.0000 C   0  0  3  0  0  0  0  0  0  0  0  0
    3.2975    5.0173    0.0000 C   0  0  3  0  0  0  0  0  0  0  0  0
    4.6405    4.4193    0.0000 C   0  0  0  0  0  0  0  0  0  0  0  0
    5.0898    3.7274    0.0000 C   0  0  0  0  0  0  0  0  0  0  0  0
    5.9137    3.7705    0.0000 C   0  0  0  0  0  0  0  0  0  0  0  0
    6.2883    4.5056    0.0000 C   0  0  0  0  0  0  0  0  0  0  0  0
    5.8389    5.1975    0.0000 C   0  0  0  0  0  0  0  0  0  0  0  0
    5.0150    5.1544    0.0000 C   0  0  0  0  0  0  0  0  0  0  0  0
    3.5110    5.8141    0.0000 C   0  0  0  0  0  0  0  0  0  0  0  0
    4.3079    6.0276    0.0000 C   0  0  0  0  0  0  0  0  0  0  0  0
    4.5215    6.8245    0.0000 C   0  0  0  0  0  0  0  0  0  0  0  0
    3.9382    7.4079    0.0000 C   0  0  0  0  0  0  0  0  0  0  0  0
    3.1413    7.1944    0.0000 C   0  0  0  0  0  0  0  0  0  0  0  0
    2.9277    6.3975    0.0000 C   0  0  0  0  0  0  0  0  0  0  0  0
    2.5579    7.7778    0.0000 O   0  0  0  0  0  0  0  0  0  0  0  0
    5.3184    7.0380    0.0000 O   0  0  0  0  0  0  0  0  0  0  0  0
    7.1121    4.5488    0.0000 O   0  0  0  0  0  0  0  0  0  0  0  0
  1  2  2  0  0  0  0
  1  6  1  0  0  0  0
  1 42  1  0  0  0  0
  2  3  1  0  0  0  0
  3  4  2  0  0  0  0
  3  7  1  0  0  0  0
  4  5  1  0  0  0  0
  4  9  1  0  0  0  0
  5  6  2  0  0  0  0
  5 22  1  0  0  0  0
  6 27  1  0  0  0  0
  7  8  1  0  0  0  0
  8  9  1  0  0  0  0
  8 10  1  0  0  0  0
  9 16  1  0  0  0  0
 10 11  2  0  0  0  0
 10 15  1  0  0  0  0
 11 12  1  0  0  0  0
 12 13  2  0  0  0  0
 13 14  1  0  0  0  0
 13 43  1  0  0  0  0
 14 15  2  0  0  0  0
 16 17  2  0  0  0  0
 16 21  1  0  0  0  0
 17 18  1  0  0  0  0
 18 19  2  0  0  0  0
 18 44  1  0  0  0  0
 19 20  1  0  0  0  0
 20 21  2  0  0  0  0
 20 45  1  0  0  0  0
 22 23  1  0  0  0  0
 22 26  1  0  0  0  0
 23 46  2  0  0  0  0
 24 25  1  0  0  0  0
 24 49  2  0  0  0  0
 24 23  1  0  0  0  0
 25 26  1  0  0  0  0
 26 34  1  0  0  0  0
 27 28  1  0  0  0  0
 27 25  1  0  0  0  0
 28 29  2  0  0  0  0
 28 33  1  0  0  0  0
 29 30  1  0  0  0  0
 30 31  2  0  0  0  0
 31 32  1  0  0  0  0
 31 40  1  0  0  0  0
 32 33  2  0  0  0  0
 34 35  2  0  0  0  0
 34 39  1  0  0  0  0
 35 36  1  0  0  0  0
 36 37  2  0  0  0  0
 37 38  1  0  0  0  0
 37 41  1  0  0  0  0
 38 39  2  0  0  0  0
 46 47  1  0  0  0  0
 46 50  1  0  0  0  0
 47 48  2  0  0  0  0
 48 49  1  0  0  0  0
 48 51  1  0  0  0  0
 49 53  1  0  0  0  0
 51 52  1  0  0  0  0
 52 53  1  0  0  0  0
 52 54  1  0  0  0  0
 53 60  1  0  0  0  0
 54 55  2  0  0  0  0
 54 59  1  0  0  0  0
 55 56  1  0  0  0  0
 56 57  2  0  0  0  0
 57 58  1  0  0  0  0
 57 68  1  0  0  0  0
 58 59  2  0  0  0  0
 60 61  2  0  0  0  0
 60 65  1  0  0  0  0
 61 62  1  0  0  0  0
 62 63  2  0  0  0  0
 62 67  1  0  0  0  0
 63 64  1  0  0  0  0
 64 65  2  0  0  0  0
 64 66  1  0  0  0  0
M  END
51
 

 47 53  0  0  0  0  0  0  0  0999 V2000
    2.8757   -0.5186    0.0000 C   0  0  3  0  0  0  0  0  0  0  0  0
    2.1612   -0.9311    0.0000 C   0  0  3  0  0  0  0  0  0  0  0  0
    2.1612   -1.7561    0.0000 C   0  0  3  0  0  0  0  0  0  0  0  0
    2.8757   -2.1686    0.0000 C   0  0  3  0  0  0  0  0  0  0  0  0
    3.5902   -1.7561    0.0000 C   0  0  3  0  0  0  0  0  0  0  0  0
    3.5902   -0.9311    0.0000 C   0  0  3  0  0  0  0  0  0  0  0  0
    2.7505   -0.1061    0.0000 C   0  0  0  0  0  0  0  0  0  0  0  0
    3.4650   -0.5421    0.0000 C   0  0  0  0  0  0  0  0  0  0  0  0
    4.3047   -0.5186    0.0000 C   0  0  3  0  0  0  0  0  0  0  0  0
    4.3046   -2.1686    0.0000 C   0  0  3  0  0  0  0  0  0  0  0  0
    5.0191   -1.7561    0.0000 C   0  0  3  0  0  0  0  0  0  0  0  0
    5.0191   -0.9311    0.0000 C   0  0  3  0  0  0  0  0  0  0  0  0
    5.7336    0.3065    0.0000 C   0  0  0  0  0  0  0  0  0  0  0  0
    5.0191   -0.1060    0.0000 C   0  0  3  0  0  0  0  0  0  0  0  0
    5.7336   -1.3436    0.0000 C   0  0  3  0  0  0  0  0  0  0  0  0
    6.4480   -0.9311    0.0000 C   0  0  3  0  0  0  0  0  0  0  0  0
    6.4480   -0.1060    0.0000 C   0  0  3  0  0  0  0  0  0  0  0  0
    5.7336   -2.1686    0.0000 N   0  0  0  0  0  0  0  0  0  0  0  0
    6.4481   -1.7561    0.0000 C   0  0  0  0  0  0  0  0  0  0  0  0
    5.0382   -2.5530    0.0000 C   0  0  3  0  0  0  0  0  0  0  0  0
    4.3046    0.3065    0.0000 O   0  0  0  0  0  0  0  0  0  0  0  0
    4.3046    1.1315    0.0000 C   0  0  0  0  0  0  0  0  0  0  0  0
    7.1625    0.3065    0.0000 O   0  0  0  0  0  0  0  0  0  0  0  0
    7.2730   -0.9311    0.0000 C   0  0  0  0  0  0  0  0  0  0  0  0
    7.6855   -0.2166    0.0000 O   0  0  0  0  0  0  0  0  0  0  0  0
    8.5105   -0.2166    0.0000 C   0  0  0  0  0  0  0  0  0  0  0  0
    5.7336   -2.9936    0.0000 C   0  0  0  0  0  0  0  0  0  0  0  0
    6.4481   -3.4061    0.0000 C   0  0  0  0  0  0  0  0  0  0  0  0
    5.2687   -3.3452    0.0000 O   0  0  0  0  0  0  0  0  0  0  0  0
    4.6979   -3.9409    0.0000 C   0  0  0  0  0  0  0  0  0  0  0  0
    2.8757   -2.9936    0.0000 O   0  0  0  0  0  0  0  0  0  0  0  0
    1.4468   -2.1686    0.0000 O   0  0  0  0  0  0  0  0  0  0  0  0
    4.0027   -2.4706    0.0000 O   0  0  0  0  0  0  0  0  0  0  0  0
    3.5902   -3.1850    0.0000 C   0  0  0  0  0  0  0  0  0  0  0  0
    4.0027   -3.8995    0.0000 C   0  0  0  0  0  0  0  0  0  0  0  0
    1.3756   -0.6793    0.0000 O   0  0  0  0  0  0  0  0  0  0  0  0
    3.0892    0.2783    0.0000 O   0  0  0  0  0  0  0  0  0  0  0  0
    2.5059    0.8617    0.0000 C   0  0  0  0  0  0  0  0  0  0  0  0
    1.7090    0.6482    0.0000 O   0  0  0  0  0  0  0  0  0  0  0  0
    2.7194    1.6586    0.0000 C   0  0  0  0  0  0  0  0  0  0  0  0
    3.5163    1.8721    0.0000 C   0  0  0  0  0  0  0  0  0  0  0  0
    3.7298    2.6690    0.0000 C   0  0  0  0  0  0  0  0  0  0  0  0
    3.1465    3.2524    0.0000 C   0  0  0  0  0  0  0  0  0  0  0  0
    2.3496    3.0389    0.0000 C   0  0  0  0  0  0  0  0  0  0  0  0
    2.1360    2.2420    0.0000 C   0  0  0  0  0  0  0  0  0  0  0  0
    2.7933   -3.3985    0.0000 O   0  0  0  0  0  0  0  0  0  0  0  0
    0.7323   -1.7561    0.0000 C   0  0  0  0  0  0  0  0  0  0  0  0
  1  2  1  0  0  0  0
  1  6  1  0  0  0  0
  1 37  1  0  0  0  0
  2  3  1  0  0  0  0
  2  7  1  0  0  0  0
  2 36  1  0  0  0  0
  3  4  1  0  0  0  0
  3 32  1  0  0  0  0
  4  5  1  0  0  0  0
  4 31  1  0  0  0  0
  5  6  1  0  0  0  0
  5 10  1  0  0  0  0
  5 33  1  0  0  0  0
  6  9  1  0  0  0  0
  7  8  1  0  0  0  0
  9  8  1  0  0  0  0
  9 12  1  0  0  0  0
 10 11  1  0  0  0  0
 11 12  1  0  0  0  0
 11 18  1  0  0  0  0
 12 15  1  0  0  0  0
 13 14  1  0  0  0  0
 13 17  1  0  0  0  0
 14 12  1  0  0  0  0
 14 21  1  0  0  0  0
 15 16  1  0  0  0  0
 15 20  1  0  0  0  0
 16 17  1  0  0  0  0
 16 24  1  0  0  0  0
 17 23  1  0  0  0  0
 18 19  1  0  0  0  0
 18 27  1  0  0  0  0
 19 16  1  0  0  0  0
 20 10  1  0  0  0  0
 20 29  1  0  0  0  0
 21 22  1  0  0  0  0
 24 25  1  0  0  0  0
 25 26  1  0  0  0  0
 27 28  1  0  0  0  0
 29 30  1  0  0  0  0
 32 47  1  0  0  0  0
 33 34  1  0  0  0  0
 34 35  1  0  0  0  0
 34 46  2  0  0  0  0
 37 38  1  0  0  0  0
 38 39  2  0  0  0  0
 38 40  1  0  0  0  0
 40 41  2  0  0  0  0
 40 45  1  0  0  0  0
 41 42  1  0  0  0  0
 42 43  2  0  0  0  0
 43 44  1  0  0  0  0
 44 45  2  0  0  0  0
M  END
52
 

 38 44  0  0  0  0  0  0  0  0999 V2000
   -1.0902   -0.8384    0.0000 C   0  0  0  0  0  0  0  0  0  0  0  0
   -1.8046   -0.4259    0.0000 C   0  0  3  0  0  0  0  0  0  0  0  0
   -1.8046    0.3991    0.0000 C   0  0  3  0  0  0  0  0  0  0  0  0
   -1.0902    0.8116    0.0000 C   0  0  3  0  0  0  0  0  0  0  0  0
   -0.3757    0.3991    0.0000 C   0  0  3  0  0  0  0  0  0  0  0  0
   -0.3757   -0.4259    0.0000 C   0  0  0  0  0  0  0  0  0  0  0  0
   -1.8117    1.1361    0.0000 C   0  0  0  0  0  0  0  0  0  0  0  0
   -1.0902    1.6366    0.0000 C   0  0  0  0  0  0  0  0  0  0  0  0
   -0.3757    2.0491    0.0000 C   0  0  0  0  0  0  0  0  0  0  0  0
    0.3388    1.6366    0.0000 C   0  0  3  0  0  0  0  0  0  0  0  0
    0.3388    0.8116    0.0000 C   0  0  3  0  0  0  0  0  0  0  0  0
    1.1233    1.8916    0.0000 C   0  0  3  0  0  0  0  0  0  0  0  0
    1.6083    1.2241    0.0000 C   0  0  0  0  0  0  0  0  0  0  0  0
    1.1234    0.5567    0.0000 C   0  0  0  0  0  0  0  0  0  0  0  0
    1.3782    2.6762    0.0000 C   0  0  3  0  0  0  0  0  0  0  0  0
    0.8262    3.2893    0.0000 C   0  0  0  0  0  0  0  0  0  0  0  0
    2.1852    2.8477    0.0000 O   0  0  0  0  0  0  0  0  0  0  0  0
    2.4401    3.6324    0.0000 C   0  0  0  0  0  0  0  0  0  0  0  0
    3.2370    3.8459    0.0000 C   0  0  0  0  0  0  0  0  0  0  0  0
    1.8722    4.2308    0.0000 O   0  0  0  0  0  0  0  0  0  0  0  0
    3.5327    4.6161    0.0000 C   0  0  0  0  0  0  0  0  0  0  0  0
    4.3565    4.5729    0.0000 C   0  0  0  0  0  0  0  0  0  0  0  0
    4.5701    3.7760    0.0000 N   0  0  0  0  0  0  0  0  0  0  0  0
    3.8782    3.3267    0.0000 C   0  0  0  0  0  0  0  0  0  0  0  0
    3.0834    5.3080    0.0000 C   0  0  0  0  0  0  0  0  0  0  0  0
    3.8350    2.5028    0.0000 C   0  0  0  0  0  0  0  0  0  0  0  0
    0.9837    2.1510    0.0000 C   0  0  0  0  0  0  0  0  0  0  0  0
    1.7881    1.9674    0.0000 N   0  0  0  0  0  0  0  0  0  0  0  0
    2.1460    1.2241    0.0000 C   0  0  0  0  0  0  0  0  0  0  0  0
    1.7880    0.4808    0.0000 C   0  0  0  0  0  0  0  0  0  0  0  0
    0.9838    0.2972    0.0000 O   0  0  0  0  0  0  0  0  0  0  0  0
    2.5087    2.4651    0.0000 C   0  0  0  0  0  0  0  0  0  0  0  0
   -1.5027    0.0971    0.0000 O   0  0  0  0  0  0  0  0  0  0  0  0
   -2.5191   -0.8384    0.0000 C   0  0  0  0  0  0  0  0  0  0  0  0
   -2.5191   -0.0134    0.0000 C   0  0  3  0  0  0  0  0  0  0  0  0
   -2.3880    0.9825    0.0000 C   0  0  0  0  0  0  0  0  0  0  0  0
   -3.1025    0.5699    0.0000 C   0  0  0  0  0  0  0  0  0  0  0  0
   -3.2813   -0.3291    0.0000 O   0  0  0  0  0  0  0  0  0  0  0  0
  1  2  1  0  0  0  0
  1  6  1  0  0  0  0
  2  3  1  0  0  0  0
  2 34  1  0  0  0  0
  3  4  1  0  0  0  0
  3  7  1  0  0  0  0
  3 36  1  0  0  0  0
  4  5  1  0  0  0  0
  4  8  1  0  0  0  0
  4 33  1  0  0  0  0
  5  6  1  0  0  0  0
  5 11  1  0  0  0  0
  8  9  1  0  0  0  0
  9 10  1  0  0  0  0
 10 11  1  0  0  0  0
 10 12  1  0  0  0  0
 10 27  1  0  0  0  0
 11 14  1  0  0  0  0
 12 13  1  0  0  0  0
 12 15  1  0  0  0  0
 13 14  1  0  0  0  0
 15 16  1  0  0  0  0
 15 17  1  0  0  0  0
 17 18  1  0  0  0  0
 18 19  1  0  0  0  0
 18 20  2  0  0  0  0
 19 21  1  0  0  0  0
 19 24  2  0  0  0  0
 21 22  2  0  0  0  0
 21 25  1  0  0  0  0
 22 23  1  0  0  0  0
 23 24  1  0  0  0  0
 24 26  1  0  0  0  0
 27 28  1  0  0  0  0
 28 29  1  0  0  0  0
 28 32  1  0  0  0  0
 29 30  1  0  0  0  0
 30 31  1  0  0  0  0
 31 11  1  0  0  0  0
 34 35  1  0  0  0  0
 35 33  1  0  0  0  0
 35 37  1  0  0  0  0
 35 38  1  0  0  0  0
 37 36  1  0  0  0  0
M  END
53
 

 29 35  0  0  0  0  0  0  0  0999 V2000
    3.5554    4.1643    0.0000 C   0  0  0  0  0  0  0  0  0  0  0  0
    2.8409    3.7518    0.0000 C   0  0  0  0  0  0  0  0  0  0  0  0
    2.8409    2.9268    0.0000 C   0  0  0  0  0  0  0  0  0  0  0  0
    3.5554    2.5143    0.0000 C   0  0  3  0  0  0  0  0  0  0  0  0
    4.2698    2.9268    0.0000 C   0  0  3  0  0  0  0  0  0  0  0  0
    4.2698    3.7518    0.0000 C   0  0  3  0  0  0  0  0  0  0  0  0
    4.2698    2.1018    0.0000 C   0  0  3  0  0  0  0  0  0  0  0  0
    4.9843    3.3393    0.0000 C   0  0  3  0  0  0  0  0  0  0  0  0
    4.9843    2.5143    0.0000 N   0  0  3  0  0  0  0  0  0  0  0  0
    5.7689    2.2594    0.0000 C   0  0  0  0  0  0  0  0  0  0  0  0
    6.2538    2.9268    0.0000 C   0  0  0  0  0  0  0  0  0  0  0  0
    5.7689    3.5942    0.0000 O   0  0  0  0  0  0  0  0  0  0  0  0
    3.8573    2.2123    0.0000 C   0  0  0  0  0  0  0  0  0  0  0  0
    3.5554    1.6893    0.0000 C   0  0  3  0  0  0  0  0  0  0  0  0
    3.8573    1.3873    0.0000 C   0  0  3  0  0  0  0  0  0  0  0  0
    3.1429    0.9748    0.0000 C   0  0  3  0  0  0  0  0  0  0  0  0
    4.6823    1.3873    0.0000 O   0  0  0  0  0  0  0  0  0  0  0  0
    4.6823    4.4663    0.0000 C   0  0  0  0  0  0  0  0  0  0  0  0
    3.5554    0.2603    0.0000 C   0  0  0  0  0  0  0  0  0  0  0  0
    2.3179    0.9748    0.0000 C   0  0  3  0  0  0  0  0  0  0  0  0
    2.9720    2.2726    0.0000 C   0  0  0  0  0  0  0  0  0  0  0  0
    2.5595    1.5582    0.0000 C   0  0  3  0  0  0  0  0  0  0  0  0
    1.7345    1.5582    0.0000 C   0  0  0  0  0  0  0  0  0  0  0  0
    2.7730    0.7613    0.0000 C   0  0  0  0  0  0  0  0  0  0  0  0
    0.9723    1.8739    0.0000 C   0  0  0  0  0  0  0  0  0  0  0  0
    2.0021    0.2126    0.0000 O   0  0  0  0  0  0  0  0  0  0  0  0
    1.1842    0.1049    0.0000 C   0  0  0  0  0  0  0  0  0  0  0  0
    0.8685   -0.6573    0.0000 C   0  0  0  0  0  0  0  0  0  0  0  0
    0.6820    0.7594    0.0000 O   0  0  0  0  0  0  0  0  0  0  0  0
  1  2  1  0  0  0  0
  1  6  1  0  0  0  0
  2  3  1  0  0  0  0
  3  4  1  0  0  0  0
  4  5  1  0  0  0  0
  4  7  1  0  0  0  0
  4 14  1  0  0  0  0
  5  6  1  0  0  0  0
  5 13  1  0  0  0  0
  6  8  1  0  0  0  0
  6 18  1  0  0  0  0
  7 17  1  0  0  0  0
  8  9  1  0  0  0  0
  8 12  1  0  0  0  0
  9  7  1  0  0  0  0
  9 10  1  0  0  0  0
 10 11  1  0  0  0  0
 11 12  1  0  0  0  0
 13 15  1  0  0  0  0
 14 16  1  0  0  0  0
 14 21  1  0  0  0  0
 15 17  1  0  0  0  0
 16 15  1  0  0  0  0
 16 19  1  0  0  0  0
 16 20  1  0  0  0  0
 20 26  1  0  0  0  0
 21 22  1  0  0  0  0
 22 23  1  0  0  0  0
 22 24  1  0  0  0  0
 23 20  1  0  0  0  0
 23 25  2  0  0  0  0
 24 19  1  0  0  0  0
 26 27  1  0  0  0  0
 27 28  1  0  0  0  0
 27 29  2  0  0  0  0
M  END
54
 

 30 35  0  0  0  0  0  0  0  0999 V2000
    2.2589    7.7143    0.0000 C   0  0  3  0  0  0  0  0  0  0  0  0
    1.5915    7.2293    0.0000 C   0  0  0  0  0  0  0  0  0  0  0  0
    1.8464    6.4448    0.0000 C   0  0  3  0  0  0  0  0  0  0  0  0
    2.6714    6.4448    0.0000 C   0  0  0  0  0  0  0  0  0  0  0  0
    2.9264    7.2293    0.0000 C   0  0  3  0  0  0  0  0  0  0  0  0
    3.3388    5.9599    0.0000 C   0  0  0  0  0  0  0  0  0  0  0  0
    4.0063    6.4448    0.0000 C   0  0  0  0  0  0  0  0  0  0  0  0
    3.7514    7.2293    0.0000 C   0  0  0  0  0  0  0  0  0  0  0  0
    1.1243    6.2316    0.0000 C   0  0  3  0  0  0  0  0  0  0  0  0
    2.4007    5.6288    0.0000 C   0  0  3  0  0  0  0  0  0  0  0  0
    3.1544    5.2179    0.0000 C   0  0  0  0  0  0  0  0  0  0  0  0
    2.2589    8.5393    0.0000 C   0  0  0  0  0  0  0  0  0  0  0  0
    2.9734    8.9518    0.0000 O   0  0  0  0  0  0  0  0  0  0  0  0
    1.5445    8.9518    0.0000 O   0  0  0  0  0  0  0  0  0  0  0  0
    2.9734    9.7768    0.0000 C   0  0  0  0  0  0  0  0  0  0  0  0
    1.4339    5.4946    0.0000 C   0  0  3  0  0  0  0  0  0  0  0  0
    0.6134    5.4083    0.0000 C   0  0  3  0  0  0  0  0  0  0  0  0
    0.4419    4.6014    0.0000 C   0  0  3  0  0  0  0  0  0  0  0  0
    1.1564    4.1889    0.0000 C   0  0  0  0  0  0  0  0  0  0  0  0
    1.7695    4.7409    0.0000 N   0  0  3  0  0  0  0  0  0  0  0  0
    2.5961    4.7265    0.0000 C   0  0  0  0  0  0  0  0  0  0  0  0
    0.2993    6.2316    0.0000 C   0  0  0  0  0  0  0  0  0  0  0  0
   -0.1132    5.6743    0.0000 C   0  0  0  0  0  0  0  0  0  0  0  0
    0.7195    5.9071    0.0000 O   0  0  0  0  0  0  0  0  0  0  0  0
    0.7118    6.9461    0.0000 C   0  0  0  0  0  0  0  0  0  0  0  0
   -0.1132    6.9461    0.0000 O   0  0  0  0  0  0  0  0  0  0  0  0
   -0.5257    7.6605    0.0000 C   0  0  0  0  0  0  0  0  0  0  0  0
   -1.3507    7.6605    0.0000 C   0  0  0  0  0  0  0  0  0  0  0  0
   -0.1132    8.3750    0.0000 O   0  0  0  0  0  0  0  0  0  0  0  0
   -0.3117    4.2658    0.0000 C   0  0  0  0  0  0  0  0  0  0  0  0
  1  2  1  0  0  0  0
  1  5  1  0  0  0  0
  1 12  1  0  0  0  0
  2  3  1  0  0  0  0
  3  4  1  0  0  0  0
  3 16  1  0  0  0  0
  3  9  1  0  0  0  0
  4  5  1  0  0  0  0
  4  6  2  0  0  0  0
  5  8  1  0  0  0  0
  6  7  1  0  0  0  0
  6 11  1  0  0  0  0
  7  8  1  0  0  0  0
  9 10  1  0  0  0  0
  9 22  1  0  0  0  0
  9 25  1  0  0  0  0
 10 11  1  0  0  0  0
 10 21  1  0  0  0  0
 12 13  1  0  0  0  0
 12 14  2  0  0  0  0
 13 15  1  0  0  0  0
 16 17  1  0  0  0  0
 16 20  1  0  0  0  0
 16 24  1  0  0  0  0
 17 18  1  0  0  0  0
 18 19  1  0  0  0  0
 18 30  1  0  0  0  0
 19 20  1  0  0  0  0
 20 21  1  0  0  0  0
 22 23  1  0  0  0  0
 23 17  1  0  0  0  0
 25 26  1  0  0  0  0
 26 27  1  0  0  0  0
 27 28  1  0  0  0  0
 27 29  2  0  0  0  0
M  END
55
 

 41 49  0  0  0  0  0  0  0  0999 V2000
   -4.9736    2.7343    0.0000 N   0  0  0  0  0  0  0  0  0  0  0  0
   -5.6880    2.3218    0.0000 C   0  0  0  0  0  0  0  0  0  0  0  0
   -5.6880    1.4968    0.0000 C   0  0  0  0  0  0  0  0  0  0  0  0
   -4.9736    1.0843    0.0000 C   0  0  0  0  0  0  0  0  0  0  0  0
   -4.2591    1.4968    0.0000 C   0  0  3  0  0  0  0  0  0  0  0  0
   -4.2591    2.3218    0.0000 C   0  0  3  0  0  0  0  0  0  0  0  0
   -3.5446    2.7343    0.0000 C   0  0  3  0  0  0  0  0  0  0  0  0
   -3.5446    1.0843    0.0000 C   0  0  0  0  0  0  0  0  0  0  0  0
   -2.8302    1.4968    0.0000 C   0  0  0  0  0  0  0  0  0  0  0  0
   -2.8302    2.3218    0.0000 C   0  0  3  0  0  0  0  0  0  0  0  0
   -4.7379    3.5829    0.0000 C   0  0  0  0  0  0  0  0  0  0  0  0
   -3.8511    3.5829    0.0000 C   0  0  3  0  0  0  0  0  0  0  0  0
   -3.0390    3.6402    0.0000 C   0  0  0  0  0  0  0  0  0  0  0  0
   -2.2242    3.5112    0.0000 C   0  0  0  0  0  0  0  0  0  0  0  0
   -2.0951    2.6964    0.0000 C   0  0  3  0  0  0  0  0  0  0  0  0
   -3.3347    4.4104    0.0000 C   0  0  0  0  0  0  0  0  0  0  0  0
   -2.8155    5.0516    0.0000 C   0  0  0  0  0  0  0  0  0  0  0  0
   -2.0007    4.9225    0.0000 C   0  0  0  0  0  0  0  0  0  0  0  0
   -1.7050    4.1523    0.0000 C   0  0  0  0  0  0  0  0  0  0  0  0
   -3.8452    4.4491    0.0000 S   0  0  0  0  0  0  0  0  0  0  0  0
   -5.2976    4.0720    0.0000 O   0  0  0  0  0  0  0  0  0  0  0  0
   -1.3600    2.3218    0.0000 S   0  0  0  0  0  0  0  0  0  0  0  0
   -1.7725    1.6074    0.0000 O   0  0  0  0  0  0  0  0  0  0  0  0
   -0.9475    3.0363    0.0000 O   0  0  0  0  0  0  0  0  0  0  0  0
   -0.6455    1.9093    0.0000 C   0  0  0  0  0  0  0  0  0  0  0  0
   -0.6455    1.0843    0.0000 C   0  0  0  0  0  0  0  0  0  0  0  0
    0.0690    0.6718    0.0000 C   0  0  0  0  0  0  0  0  0  0  0  0
    0.7834    1.0843    0.0000 C   0  0  0  0  0  0  0  0  0  0  0  0
    0.7834    1.9093    0.0000 C   0  0  0  0  0  0  0  0  0  0  0  0
    0.0689    2.3218    0.0000 C   0  0  0  0  0  0  0  0  0  0  0  0
   -4.5568    4.8665    0.0000 C   0  0  0  0  0  0  0  0  0  0  0  0
   -4.5512    5.6915    0.0000 C   0  0  0  0  0  0  0  0  0  0  0  0
   -5.2628    6.1088    0.0000 C   0  0  0  0  0  0  0  0  0  0  0  0
   -5.9801    5.7012    0.0000 C   0  0  0  0  0  0  0  0  0  0  0  0
   -5.9857    4.8763    0.0000 C   0  0  0  0  0  0  0  0  0  0  0  0
   -5.2741    4.4589    0.0000 C   0  0  0  0  0  0  0  0  0  0  0  0
    1.4979    0.6718    0.0000 O   0  0  0  0  0  0  0  0  0  0  0  0
    2.2124    1.0843    0.0000 C   0  0  0  0  0  0  0  0  0  0  0  0
   -4.0646    2.7860    0.0000 C   0  0  0  0  0  0  0  0  0  0  0  0
   -3.4813    2.2026    0.0000 C   0  0  3  0  0  0  0  0  0  0  0  0
   -3.4812    1.5203    0.0000 C   0  0  0  0  0  0  0  0  0  0  0  0
  1  2  1  0  0  0  0
  1  6  1  0  0  0  0
  1 11  1  0  0  0  0
  2  3  1  0  0  0  0
  3  4  1  0  0  0  0
  4  5  1  0  0  0  0
  5  6  1  0  0  0  0
  5  8  1  0  0  0  0
  5 41  1  0  0  0  0
  7 10  1  0  0  0  0
  7  6  1  0  0  0  0
  8  9  2  0  0  0  0
  9 10  1  0  0  0  0
 10 15  1  0  0  0  0
 11 12  1  0  0  0  0
 11 21  2  0  0  0  0
 12  7  1  0  0  0  0
 12 20  1  0  0  0  0
 12 39  1  0  0  0  0
 13 16  2  0  0  0  0
 13  7  1  0  0  0  0
 14 15  1  0  0  0  0
 14 19  2  0  0  0  0
 14 13  1  0  0  0  0
 15 22  1  0  0  0  0
 16 17  1  0  0  0  0
 17 18  2  0  0  0  0
 18 19  1  0  0  0  0
 20 31  1  0  0  0  0
 22 23  2  0  0  0  0
 22 24  2  0  0  0  0
 22 25  1  0  0  0  0
 25 26  2  0  0  0  0
 25 30  1  0  0  0  0
 26 27  1  0  0  0  0
 27 28  2  0  0  0  0
 28 29  1  0  0  0  0
 28 37  1  0  0  0  0
 29 30  2  0  0  0  0
 31 32  2  0  0  0  0
 31 36  1  0  0  0  0
 32 33  1  0  0  0  0
 33 34  2  0  0  0  0
 34 35  1  0  0  0  0
 35 36  2  0  0  0  0
 37 38  1  0  0  0  0
 39 40  1  0  0  0  0
 40 10  1  0  0  0  0
 41 40  1  0  0  0  0
M  END
56
 

 54 61  0  0  0  0  0  0  0  0999 V2000
    8.3973   -4.8911    0.0000 C   0  0  3  0  0  0  0  0  0  0  0  0
    7.6829   -5.3036    0.0000 C   0  0  0  0  0  0  0  0  0  0  0  0
    8.3973   -6.5411    0.0000 C   0  0  0  0  0  0  0  0  0  0  0  0
    9.1118   -6.1286    0.0000 O   0  0  0  0  0  0  0  0  0  0  0  0
    9.1118   -5.3036    0.0000 C   0  0  3  0  0  0  0  0  0  0  0  0
    7.6829   -3.6535    0.0000 C   0  0  0  0  0  0  0  0  0  0  0  0
    6.9684   -4.0660    0.0000 C   0  0  3  0  0  0  0  0  0  0  0  0
    6.9684   -4.8911    0.0000 C   0  0  3  0  0  0  0  0  0  0  0  0
    8.3973   -4.0660    0.0000 C   0  0  0  0  0  0  0  0  0  0  0  0
    6.2539   -3.6535    0.0000 C   0  0  3  0  0  0  0  0  0  0  0  0
    5.5395   -3.2410    0.0000 C   0  0  3  0  0  0  0  0  0  0  0  0
    4.8250   -3.6535    0.0000 C   0  0  3  0  0  0  0  0  0  0  0  0
    4.8250   -4.4786    0.0000 C   0  0  3  0  0  0  0  0  0  0  0  0
    5.5395   -4.8911    0.0000 C   0  0  3  0  0  0  0  0  0  0  0  0
    6.2539   -4.4786    0.0000 C   0  0  3  0  0  0  0  0  0  0  0  0
    6.2539   -5.3036    0.0000 C   0  0  3  0  0  0  0  0  0  0  0  0
    5.3392   -4.4222    0.0000 C   0  0  0  0  0  0  0  0  0  0  0  0
    9.1118   -4.4786    0.0000 C   0  0  0  0  0  0  0  0  0  0  0  0
    9.8263   -4.8911    0.0000 C   0  0  0  0  0  0  0  0  0  0  0  0
   10.5799   -5.2266    0.0000 C   0  0  0  0  0  0  0  0  0  0  0  0
   11.1319   -4.6136    0.0000 O   0  0  0  0  0  0  0  0  0  0  0  0
   10.7194   -3.8991    0.0000 C   0  0  0  0  0  0  0  0  0  0  0  0
    9.9125   -4.0706    0.0000 C   0  0  0  0  0  0  0  0  0  0  0  0
    8.3973   -7.3661    0.0000 O   0  0  0  0  0  0  0  0  0  0  0  0
    6.2539   -6.1286    0.0000 O   0  0  0  0  0  0  0  0  0  0  0  0
    6.5559   -4.7805    0.0000 O   0  0  0  0  0  0  0  0  0  0  0  0
    6.7694   -5.5774    0.0000 C   0  0  3  0  0  0  0  0  0  0  0  0
    7.4288   -5.7516    0.0000 O   0  0  0  0  0  0  0  0  0  0  0  0
    7.6829   -6.1286    0.0000 C   0  0  0  0  0  0  0  0  0  0  0  0
    6.9829   -6.3743    0.0000 C   0  0  3  0  0  0  0  0  0  0  0  0
    6.3996   -6.9576    0.0000 C   0  0  0  0  0  0  0  0  0  0  0  0
    7.7798   -6.5878    0.0000 C   0  0  0  0  0  0  0  0  0  0  0  0
    6.6131   -7.7545    0.0000 C   0  0  0  0  0  0  0  0  0  0  0  0
    6.0297   -8.3379    0.0000 C   0  0  0  0  0  0  0  0  0  0  0  0
    4.1105   -4.8911    0.0000 O   0  0  0  0  0  0  0  0  0  0  0  0
    4.1105   -3.2410    0.0000 C   0  0  0  0  0  0  0  0  0  0  0  0
    4.8250   -2.8285    0.0000 C   0  0  0  0  0  0  0  0  0  0  0  0
    3.3960   -4.4785    0.0000 C   0  0  0  0  0  0  0  0  0  0  0  0
    2.6816   -4.8910    0.0000 C   0  0  0  0  0  0  0  0  0  0  0  0
    1.9671   -4.4785    0.0000 C   0  0  0  0  0  0  0  0  0  0  0  0
    3.3960   -3.6535    0.0000 O   0  0  0  0  0  0  0  0  0  0  0  0
    1.2526   -4.8910    0.0000 C   0  0  0  0  0  0  0  0  0  0  0  0
    2.6816   -5.7160    0.0000 C   0  0  0  0  0  0  0  0  0  0  0  0
    4.8250   -5.3036    0.0000 O   0  0  0  0  0  0  0  0  0  0  0  0
    4.8250   -6.1286    0.0000 C   0  0  0  0  0  0  0  0  0  0  0  0
    4.1105   -6.5411    0.0000 C   0  0  0  0  0  0  0  0  0  0  0  0
    5.5395   -6.5411    0.0000 O   0  0  0  0  0  0  0  0  0  0  0  0
    4.8250   -2.0035    0.0000 C   0  0  0  0  0  0  0  0  0  0  0  0
    4.1105   -1.5910    0.0000 O   0  0  0  0  0  0  0  0  0  0  0  0
    5.5395   -1.5910    0.0000 O   0  0  0  0  0  0  0  0  0  0  0  0
    4.1105   -0.7660    0.0000 C   0  0  0  0  0  0  0  0  0  0  0  0
    6.2539   -2.8285    0.0000 C   0  0  0  0  0  0  0  0  0  0  0  0
    6.9684   -3.2410    0.0000 C   0  0  0  0  0  0  0  0  0  0  0  0
    6.9866   -3.6006    0.0000 O   0  0  0  0  0  0  0  0  0  0  0  0
  1  2  1  0  0  0  0
  1  5  1  0  0  0  0
  1  9  1  0  0  0  0
  1 18  1  0  0  0  0
  2 29  2  0  0  0  0
  3  4  1  0  0  0  0
  3 24  2  0  0  0  0
  4  5  1  0  0  0  0
  5 19  1  0  0  0  0
  6  7  1  0  0  0  0
  6  9  1  0  0  0  0
  7  8  1  0  0  0  0
  7 10  1  0  0  0  0
  7 26  1  0  0  0  0
  8  2  1  0  0  0  0
  8 16  1  0  0  0  0
 10 53  1  0  0  0  0
 11 12  1  0  0  0  0
 11 10  1  0  0  0  0
 11 37  1  0  0  0  0
 11 52  1  0  0  0  0
 12 13  1  0  0  0  0
 12 36  1  0  0  0  0
 13 14  1  0  0  0  0
 13 35  1  0  0  0  0
 14 15  1  0  0  0  0
 14 44  1  0  0  0  0
 15 10  1  0  0  0  0
 15 17  1  0  0  0  0
 15 54  1  0  0  0  0
 16 14  1  0  0  0  0
 16 25  1  0  0  0  0
 17 12  1  0  0  0  0
 19 20  2  0  0  0  0
 19 23  1  0  0  0  0
 20 21  1  0  0  0  0
 21 22  1  0  0  0  0
 22 23  2  0  0  0  0
 26 27  1  0  0  0  0
 27 25  1  0  0  0  0
 27 28  1  0  0  0  0
 27 30  1  0  0  0  0
 28  8  1  0  0  0  0
 29  3  1  0  0  0  0
 30 31  1  0  0  0  0
 30 32  1  0  0  0  0
 31 33  1  0  0  0  0
 33 34  1  0  0  0  0
 35 38  1  0  0  0  0
 37 48  1  0  0  0  0
 38 39  1  0  0  0  0
 38 41  2  0  0  0  0
 39 40  2  0  0  0  0
 39 43  1  0  0  0  0
 40 42  1  0  0  0  0
 44 45  1  0  0  0  0
 45 46  1  0  0  0  0
 45 47  2  0  0  0  0
 48 49  1  0  0  0  0
 48 50  2  0  0  0  0
 49 51  1  0  0  0  0
M  END
57
 

 66 80  0  0  0  0  0  0  0  0999 V2000
    7.9364   -1.3015    0.0000 N   0  0  0  0  0  0  0  0  0  0  0  0
    7.2220   -0.8890    0.0000 C   0  0  3  0  0  0  0  0  0  0  0  0
    7.2220   -0.0640    0.0000 C   0  0  3  0  0  0  0  0  0  0  0  0
    8.6509   -0.0640    0.0000 C   0  0  3  0  0  0  0  0  0  0  0  0
    8.6509   -0.8890    0.0000 C   0  0  3  0  0  0  0  0  0  0  0  0
    9.3654   -1.3015    0.0000 C   0  0  3  0  0  0  0  0  0  0  0  0
   10.0799   -0.8890    0.0000 C   0  0  3  0  0  0  0  0  0  0  0  0
   10.0799   -0.0640    0.0000 C   0  0  0  0  0  0  0  0  0  0  0  0
    9.3654    0.3485    0.0000 C   0  0  3  0  0  0  0  0  0  0  0  0
    8.0378    0.4880    0.0000 C   0  0  0  0  0  0  0  0  0  0  0  0
    8.3734    1.2417    0.0000 C   0  0  0  0  0  0  0  0  0  0  0  0
    9.1938    1.1555    0.0000 N   0  0  0  0  0  0  0  0  0  0  0  0
    7.2173    0.4018    0.0000 C   0  0  0  0  0  0  0  0  0  0  0  0
    6.7324    1.0692    0.0000 C   0  0  0  0  0  0  0  0  0  0  0  0
    7.0680    1.8229    0.0000 C   0  0  0  0  0  0  0  0  0  0  0  0
    7.8885    1.9091    0.0000 C   0  0  0  0  0  0  0  0  0  0  0  0
    6.5830    2.4903    0.0000 O   0  0  0  0  0  0  0  0  0  0  0  0
    6.9185    3.2440    0.0000 C   0  0  0  0  0  0  0  0  0  0  0  0
    7.7390    3.3302    0.0000 C   0  0  0  0  0  0  0  0  0  0  0  0
    8.2240    2.6628    0.0000 C   0  0  0  0  0  0  0  0  0  0  0  0
    9.7459    1.7686    0.0000 O   0  0  0  0  0  0  0  0  0  0  0  0
    6.1217    3.4575    0.0000 C   0  0  0  0  0  0  0  0  0  0  0  0
    6.9185    4.0690    0.0000 C   0  0  0  0  0  0  0  0  0  0  0  0
   10.3916    0.7132    0.0000 C   0  0  0  0  0  0  0  0  0  0  0  0
   10.8964   -0.1990    0.0000 C   0  0  0  0  0  0  0  0  0  0  0  0
    8.9529   -2.0160    0.0000 C   0  0  0  0  0  0  0  0  0  0  0  0
    9.3654   -2.7305    0.0000 N   0  0  0  0  0  0  0  0  0  0  0  0
   10.1904   -2.7305    0.0000 C   0  0  3  0  0  0  0  0  0  0  0  0
   10.6029   -2.0160    0.0000 C   0  0  0  0  0  0  0  0  0  0  0  0
   10.1904   -1.3015    0.0000 N   0  0  0  0  0  0  0  0  0  0  0  0
    9.1104   -3.5150    0.0000 C   0  0  0  0  0  0  0  0  0  0  0  0
    9.7779   -4.0000    0.0000 C   0  0  0  0  0  0  0  0  0  0  0  0
   10.4453   -3.5151    0.0000 C   0  0  0  0  0  0  0  0  0  0  0  0
    9.7459   -1.8908    0.0000 C   0  0  0  0  0  0  0  0  0  0  0  0
    6.7899   -1.6624    0.0000 C   0  0  0  0  0  0  0  0  0  0  0  0
    8.1500   -2.0984    0.0000 C   0  0  0  0  0  0  0  0  0  0  0  0
    7.0230   -2.4004    0.0000 N   0  0  0  0  0  0  0  0  0  0  0  0
    7.7375   -2.8129    0.0000 C   0  0  3  0  0  0  0  0  0  0  0  0
    6.4099   -2.9523    0.0000 C   0  0  0  0  0  0  0  0  0  0  0  0
    6.7455   -3.7060    0.0000 C   0  0  0  0  0  0  0  0  0  0  0  0
    7.5659   -3.6198    0.0000 C   0  0  0  0  0  0  0  0  0  0  0  0
    8.3131   -1.6257    0.0000 O   0  0  0  0  0  0  0  0  0  0  0  0
    8.8644   -2.5109    0.0000 O   0  0  0  0  0  0  0  0  0  0  0  0
    7.5618   -1.5706    0.0000 C   0  0  0  0  0  0  0  0  0  0  0  0
    6.0126   -1.5813    0.0000 O   0  0  0  0  0  0  0  0  0  0  0  0
   11.4279   -2.0160    0.0000 O   0  0  0  0  0  0  0  0  0  0  0  0
    6.5075    0.3485    0.0000 C   0  0  3  0  0  0  0  0  0  0  0  0
    5.7931   -0.0640    0.0000 C   0  0  3  0  0  0  0  0  0  0  0  0
    5.7931   -0.8890    0.0000 C   0  0  0  0  0  0  0  0  0  0  0  0
    6.5075   -1.3015    0.0000 C   0  0  3  0  0  0  0  0  0  0  0  0
    6.1395    1.1948    0.0000 C   0  0  0  0  0  0  0  0  0  0  0  0
    5.3145    1.1948    0.0000 C   0  0  0  0  0  0  0  0  0  0  0  0
    5.0592    0.3624    0.0000 N   0  0  0  0  0  0  0  0  0  0  0  0
    4.9020    1.9092    0.0000 C   0  0  0  0  0  0  0  0  0  0  0  0
    5.3145    2.6237    0.0000 C   0  0  0  0  0  0  0  0  0  0  0  0
    6.1395    2.6237    0.0000 C   0  0  0  0  0  0  0  0  0  0  0  0
    6.5520    1.9092    0.0000 C   0  0  0  0  0  0  0  0  0  0  0  0
    4.0770    1.9092    0.0000 C   0  0  0  0  0  0  0  0  0  0  0  0
    3.6645    2.6237    0.0000 C   0  0  0  0  0  0  0  0  0  0  0  0
    4.0769    3.3381    0.0000 C   0  0  0  0  0  0  0  0  0  0  0  0
    4.9020    3.3382    0.0000 O   0  0  0  0  0  0  0  0  0  0  0  0
    4.0769    4.1631    0.0000 C   0  0  0  0  0  0  0  0  0  0  0  0
    3.2800    3.5517    0.0000 C   0  0  0  0  0  0  0  0  0  0  0  0
    4.9681   -0.8890    0.0000 C   0  0  0  0  0  0  0  0  0  0  0  0
    5.5795   -1.6859    0.0000 C   0  0  0  0  0  0  0  0  0  0  0  0
    4.2623    0.1489    0.0000 O   0  0  0  0  0  0  0  0  0  0  0  0
  1  2  1  0  0  0  0
  1  5  1  0  0  0  0
  1 36  1  0  0  0  0
  2  3  1  0  0  0  0
  2 35  1  0  0  0  0
  3  4  1  0  0  0  0
  4  5  1  0  0  0  0
  4  9  1  0  0  0  0
  4 10  1  0  0  0  0
  5  6  1  0  0  0  0
  6  7  1  0  0  0  0
  6 26  1  0  0  0  0
  6 30  1  0  0  0  0
  7  8  1  0  0  0  0
  7 34  1  0  0  0  0
  8  9  1  0  0  0  0
  8 24  1  0  0  0  0
  8 25  1  0  0  0  0
  9 12  1  0  0  0  0
 10 13  2  0  0  0  0
 11 10  1  0  0  0  0
 11 12  1  0  0  0  0
 11 16  2  0  0  0  0
 12 21  1  0  0  0  0
 13 14  1  0  0  0  0
 14 15  2  0  0  0  0
 15 16  1  0  0  0  0
 15 17  1  0  0  0  0
 16 20  1  0  0  0  0
 17 18  1  0  0  0  0
 18 19  1  0  0  0  0
 18 22  1  0  0  0  0
 18 23  1  0  0  0  0
 19 20  2  0  0  0  0
 26 27  1  0  0  0  0
 26 42  2  0  0  0  0
 27 28  1  0  0  0  0
 27 31  1  0  0  0  0
 28 29  1  0  0  0  0
 28 33  1  0  0  0  0
 29 30  1  0  0  0  0
 29 46  2  0  0  0  0
 31 32  1  0  0  0  0
 32 33  1  0  0  0  0
 34 28  1  0  0  0  0
 35 37  1  0  0  0  0
 35 45  2  0  0  0  0
 36 38  1  0  0  0  0
 36 43  2  0  0  0  0
 37 39  1  0  0  0  0
 38 37  1  0  0  0  0
 38 41  1  0  0  0  0
 39 40  1  0  0  0  0
 40 41  1  0  0  0  0
 44 38  1  0  0  0  0
 47 48  1  0  0  0  0
 47  3  1  0  0  0  0
 47 51  1  0  0  0  0
 48 49  1  0  0  0  0
 48 53  1  0  0  0  0
 49 50  1  0  0  0  0
 49 64  1  0  0  0  0
 49 65  1  0  0  0  0
 50  2  1  0  0  0  0
 50 44  1  0  0  0  0
 51 57  2  0  0  0  0
 51 52  1  0  0  0  0
 52 53  1  0  0  0  0
 52 54  2  0  0  0  0
 53 66  1  0  0  0  0
 54 55  1  0  0  0  0
 54 58  1  0  0  0  0
 55 56  2  0  0  0  0
 55 61  1  0  0  0  0
 56 57  1  0  0  0  0
 58 59  2  0  0  0  0
 59 60  1  0  0  0  0
 60 61  1  0  0  0  0
 60 62  1  0  0  0  0
 60 63  1  0  0  0  0
M  END
58
 

 23 41  0  0  0  0  0  0  0  0999 V2000
    3.1543    1.2521    0.0093 B   0  0  0  0  0  0  0  0  0  0  0  0
    1.7223    1.6751   -0.0215 B   0  0  0  0  0  0  0  0  0  0  0  0
    1.7599    3.8318    0.0192 B   0  0  0  0  0  0  0  0  0  0  0  0
    3.1289    4.2074   -0.0332 B   0  0  0  0  0  0  0  0  0  0  0  0
    4.2604    5.8439    0.0191 B   0  0  0  0  0  0  0  0  0  0  0  0
    5.4116    4.2452   -0.0284 B   0  0  0  0  0  0  0  0  0  0  0  0
    4.3077    1.9489   -0.0285 B   0  0  0  0  0  0  0  0  0  0  0  0
    4.1613   -0.3697   -0.0149 B   0  0  0  0  0  0  0  0  0  0  0  0
    6.8178    1.7348   -0.0229 B   0  0  0  0  0  0  0  0  0  0  0  0
    6.8131    3.9050    0.0289 B   0  0  0  0  0  0  0  0  0  0  0  0
    4.3025    3.3442    0.0238 C   0  0  0  0  0  0  0  0  0  0  0  0
    5.4606    1.2727    0.0308 B   0  0  0  0  0  0  0  0  0  0  0  0
    7.2909   -0.8455    0.0393 Cl  0  0  0  0  0  0  0  0  0  0  0  0
    9.2425    5.0573    0.0292 Cl  0  0  0  0  0  0  0  0  0  0  0  0
    9.3427    0.7275   -0.0230 Cl  0  0  0  0  0  0  0  0  0  0  0  0
    4.1544   -2.9804   -0.0147 Cl  0  0  0  0  0  0  0  0  0  0  0  0
    5.2108   -0.7258   -0.0340 Cl  0  0  0  0  0  0  0  0  0  0  0  0
    7.1148    6.4824   -0.0218 Cl  0  0  0  0  0  0  0  0  0  0  0  0
    4.2742    8.5394    0.0209 Cl  0  0  0  0  0  0  0  0  0  0  0  0
    1.4360    6.4769   -0.0366 Cl  0  0  0  0  0  0  0  0  0  0  0  0
   -0.6582    5.0179    0.0301 Cl  0  0  0  0  0  0  0  0  0  0  0  0
   -0.8174    0.7374   -0.0252 Cl  0  0  0  0  0  0  0  0  0  0  0  0
    1.4352   -0.7812    0.0235 Cl  0  0  0  0  0  0  0  0  0  0  0  0
  1  3  1  0  0  0  0
  1  8  1  0  0  0  0
  1 11  1  0  0  0  0
  1 12  1  0  0  0  0
  2  1  1  0  0  0  0
  2  4  1  0  0  0  0
  2  7  1  0  0  0  0
  2  8  1  0  0  0  0
  3  2  1  0  0  0  0
  3  5  1  0  0  0  0
  3 11  1  0  0  0  0
  4  3  1  0  0  0  0
  4  6  1  0  0  0  0
  4  7  1  0  0  0  0
  5  4  1  0  0  0  0
  5 10  1  0  0  0  0
  5 11  1  0  0  0  0
  6  5  1  0  0  0  0
  6  9  1  0  0  0  0
  6 10  1  0  0  0  0
  7  6  1  0  0  0  0
  7  9  1  0  0  0  0
  8  7  1  0  0  0  0
  8 12  1  0  0  0  0
  9  8  1  0  0  0  0
  9 12  1  0  0  0  0
 10  9  1  0  0  0  0
 10 12  1  0  0  0  0
 11 10  1  0  0  0  0
 12 11  1  0  0  0  0
 13 12  1  0  0  0  0
 14 10  1  0  0  0  0
 15  9  1  0  0  0  0
 16  8  1  0  0  0  0
 17  7  1  0  0  0  0
 18  6  1  0  0  0  0
 19  5  1  0  0  0  0
 20  4  1  0  0  0  0
 21  3  1  0  0  0  0
 22  2  1  0  0  0  0
 23  1  1  0  0  0  0
M  END
59
 

 92124  0  0  0  0  0  0  0  0999 V2000
    9.0008   -0.3662    0.0338 N   0  0  0  0  0  0  0  0  0  0  0  0
   10.3557    0.5240    0.0309 C   0  0  0  0  0  0  0  0  0  0  0  0
   11.8105   -0.1801    0.0014 O   0  0  0  0  0  0  0  0  0  0  0  0
   10.3373    2.1623    0.0233 C   0  0  0  0  0  0  0  0  0  0  0  0
   11.6991    3.0479    0.0198 C   0  0  0  0  0  0  0  0  0  0  0  0
   13.1389    2.2708    0.0002 C   0  0  0  0  0  0  0  0  0  0  0  0
   13.1799    0.6560    0.0024 N   0  0  0  0  0  0  0  0  0  0  0  0
   14.5060    3.1386    0.0055 O   0  0  0  0  0  0  0  0  0  0  0  0
   11.6466    4.6632   -0.0201 C   0  0  0  0  0  0  0  0  0  0  0  0
   13.0865    5.4875   -0.0083 C   0  0  0  0  0  0  0  0  0  0  0  0
   13.0683    7.1113   -0.0063 N   0  0  0  0  0  0  0  0  0  0  0  0
   14.4877    4.6673   -0.0179 O   0  0  0  0  0  0  0  0  0  0  0  0
   10.2731    5.4978   -0.0173 C   0  0  0  0  0  0  0  0  0  0  0  0
   10.2927    7.1378   -0.0354 C   0  0  0  0  0  0  0  0  0  0  0  0
    8.8863    4.7429   -0.3321 C   0  0  1  0  0  0  0  0  0  0  0  0
    8.1823    6.1451    0.7450 C   0  0  0  0  0  0  0  0  0  0  0  0
    7.2560    7.3538   -0.1055 C   0  0  0  0  0  0  0  0  0  0  0  0
    5.9250    8.0058    0.4278 C   0  0  0  0  0  0  0  0  0  0  0  0
    4.4277    8.4122   -0.4773 C   0  0  0  0  0  0  0  0  0  0  0  0
    2.9612    8.0309    0.4657 C   0  0  0  0  0  0  0  0  0  0  0  0
    3.6504    7.2182    1.8537 C   0  0  0  0  0  0  0  0  0  0  0  0
    5.2714    7.2342    1.8525 C   0  0  0  0  0  0  0  0  0  0  0  0
    6.0876    6.0476    2.4714 C   0  0  0  0  0  0  0  0  0  0  0  0
    7.1628    5.2554    1.6289 C   0  0  0  0  0  0  0  0  0  0  0  0
    7.5076    3.7357    2.2755 C   0  0  0  0  0  0  0  0  0  0  0  0
    6.1131    3.3688    3.2422 C   0  0  0  0  0  0  0  0  0  0  0  0
    5.2823    2.0982    3.1946 C   0  0  0  0  0  0  0  0  0  0  0  0
    5.8250    0.7910    2.1896 C   0  0  0  0  0  0  0  0  0  0  0  0
    7.0436    1.1300    1.4069 C   0  0  0  0  0  0  0  0  0  0  0  0
    7.2000    0.3136   -0.0718 C   0  0  0  0  0  0  0  0  0  0  0  0
    8.1229    1.5569   -1.0358 C   0  0  0  0  0  0  0  0  0  0  0  0
    6.9467    2.4842   -1.7467 C   0  0  0  0  0  0  0  0  0  0  0  0
    7.2865    3.9462   -2.4793 C   0  0  0  0  0  0  0  0  0  0  0  0
    7.9198    5.1193   -1.6610 C   0  0  1  0  0  0  0  0  0  0  0  0
    7.0626    6.5788   -1.6602 C   0  0  0  0  0  0  0  0  0  0  0  0
    5.7610    6.8479   -2.3709 C   0  0  0  0  0  0  0  0  0  0  0  0
    4.3842    7.6815   -1.8593 C   0  0  0  0  0  0  0  0  0  0  0  0
    2.9284    6.9136   -2.4070 C   0  0  0  0  0  0  0  0  0  0  0  0
    3.5058    5.6287   -3.4180 C   0  0  0  0  0  0  0  0  0  0  0  0
    5.1460    5.6198   -3.4087 C   0  0  0  0  0  0  0  0  0  0  0  0
    5.9561    4.3163   -3.4758 C   0  0  0  0  0  0  0  0  0  0  0  0
    5.0678    2.8596   -3.6326 C   0  0  0  0  0  0  0  0  0  0  0  0
    5.9085    1.6382   -2.6954 C   0  0  0  0  0  0  0  0  0  0  0  0
    5.1312    0.4778   -2.0492 C   0  0  0  0  0  0  0  0  0  0  0  0
    5.8073   -0.3119   -0.6635 C   0  0  0  0  0  0  0  0  0  0  0  0
    4.3696   -0.7062    0.2767 C   0  0  0  0  0  0  0  0  0  0  0  0
    4.4040    0.0564    1.6371 C   0  0  0  0  0  0  0  0  0  0  0  0
    3.0314    0.8684    2.1701 C   0  0  0  0  0  0  0  0  0  0  0  0
    3.6135    2.0946    3.1979 C   0  0  0  0  0  0  0  0  0  0  0  0
    2.8079    3.4007    3.2820 C   0  0  0  0  0  0  0  0  0  0  0  0
    1.4876    3.7448    2.2980 C   0  0  0  0  0  0  0  0  0  0  0  0
    1.7998    5.2487    1.6110 C   0  0  1  0  0  0  0  0  0  0  0  0
    0.6711    6.1707    0.8323 C   0  0  1  0  0  0  0  0  0  0  0  0
    1.5868    7.3871   -0.0520 C   0  0  0  0  0  0  0  0  0  0  0  0
    1.7341    6.5974   -1.6116 C   0  0  0  0  0  0  0  0  0  0  0  0
    0.8212    5.1928   -1.6054 C   0  0  1  0  0  0  0  0  0  0  0  0
    1.2822    3.9810   -2.5052 C   0  0  0  0  0  0  0  0  0  0  0  0
    2.6870    4.3713   -3.4797 C   0  0  0  0  0  0  0  0  0  0  0  0
    3.5771    2.8504   -3.6334 C   0  0  0  0  0  0  0  0  0  0  0  0
    2.7248    1.6867   -2.6839 C   0  0  0  0  0  0  0  0  0  0  0  0
    3.5183    0.4576   -2.0566 C   0  0  0  0  0  0  0  0  0  0  0  0
    2.8689   -0.2721   -0.6369 C   0  0  0  0  0  0  0  0  0  0  0  0
    1.5148    0.3704   -0.0231 C   0  0  0  0  0  0  0  0  0  0  0  0
    1.7116    1.1777    1.4562 C   0  0  0  0  0  0  0  0  0  0  0  0
    0.8540    2.5966    1.4651 C   0  0  0  0  0  0  0  0  0  0  0  0
   -0.0927    2.9695    0.1307 C   0  0  1  0  0  0  0  0  0  0  0  0
   -1.5272    2.2336    0.0089 C   0  0  0  0  0  0  0  0  0  0  0  0
   -1.5399    0.5910    0.0328 C   0  0  0  0  0  0  0  0  0  0  0  0
   -0.1806   -0.2891    0.0381 N   0  0  0  0  0  0  0  0  0  0  0  0
   -2.9909   -0.1170    0.0073 O   0  0  0  0  0  0  0  0  0  0  0  0
   -2.8919    3.1106    0.0068 C   0  0  0  0  0  0  0  0  0  0  0  0
   -4.3430    2.3238    0.0082 C   0  0  0  0  0  0  0  0  0  0  0  0
   -4.3694    0.7018    0.0001 N   0  0  0  0  0  0  0  0  0  0  0  0
   -5.7169    3.1802    0.0293 O   0  0  0  0  0  0  0  0  0  0  0  0
   -2.8787    4.7232   -0.0101 C   0  0  0  0  0  0  0  0  0  0  0  0
   -4.3132    5.5383    0.0002 C   0  0  0  0  0  0  0  0  0  0  0  0
   -5.7006    4.7069   -0.0197 O   0  0  0  0  0  0  0  0  0  0  0  0
   -4.3052    7.1605    0.0033 N   0  0  0  0  0  0  0  0  0  0  0  0
   -1.4929    5.5743   -0.0086 C   0  0  0  0  0  0  0  0  0  0  0  0
   -1.4798    7.2108   -0.0314 C   0  0  0  0  0  0  0  0  0  0  0  0
   -0.1043    8.0708   -0.0341 N   0  0  0  0  0  0  0  0  0  0  0  0
   -2.9264    7.9509   -0.0133 O   0  0  0  0  0  0  0  0  0  0  0  0
   -0.0881    4.8099   -0.2384 C   0  0  1  0  0  0  0  0  0  0  0  0
    0.6065    1.5805   -0.9597 C   0  0  1  0  0  0  0  0  0  0  0  0
    1.6523    2.4761   -1.8039 C   0  0  0  0  0  0  0  0  0  0  0  0
    2.8607    6.0713    2.5145 C   0  0  0  0  0  0  0  0  0  0  0  0
    3.7206    4.8591    3.4332 C   0  0  0  0  0  0  0  0  0  0  0  0
    5.2376    4.8404    3.4101 C   0  0  0  0  0  0  0  0  0  0  0  0
    8.8546    2.8584    0.0190 C   0  0  1  0  0  0  0  0  0  0  0  0
    7.9555    2.5536    1.3699 C   0  0  1  0  0  0  0  0  0  0  0  0
    8.9684    7.9238   -0.0325 N   0  0  0  0  0  0  0  0  0  0  0  0
   11.6264    7.9078   -0.0354 O   0  0  0  0  0  0  0  0  0  0  0  0
  2  1  1  0  0  0  0
  3  2  2  0  0  0  0
  4  2  1  0  0  0  0
  4  5  2  0  0  0  0
  6  5  1  0  0  0  0
  7  6  1  0  0  0  0
  8  6  2  0  0  0  0
  9  5  1  0  0  0  0
  9 13  2  0  0  0  0
 10  9  1  0  0  0  0
 11 10  1  0  0  0  0
 12 10  2  0  0  0  0
 14 13  1  0  0  0  0
 14 91  1  0  0  0  0
 14 92  2  0  0  0  0
 15 13  1  6  0  0  0
 15 34  1  0  0  0  0
 15 89  1  0  0  0  0
 16 15  1  0  0  0  0
 16 24  1  0  0  0  0
 16 17  2  0  0  0  0
 17 35  1  0  0  0  0
 18 17  1  0  0  0  0
 18 22  2  0  0  0  0
 19 18  1  0  0  0  0
 20 19  1  0  0  0  0
 20 54  2  0  0  0  0
 21 20  1  0  0  0  0
 22 21  1  0  0  0  0
 23 22  1  0  0  0  0
 23 88  2  0  0  0  0
 24 23  1  0  0  0  0
 24 25  2  0  0  0  0
 26 25  1  0  0  0  0
 26 88  1  0  0  0  0
 27 26  2  0  0  0  0
 27 49  1  0  0  0  0
 28 27  1  0  0  0  0
 28 47  2  0  0  0  0
 29 28  1  0  0  0  0
 29 90  1  0  0  0  0
 30 29  2  0  0  0  0
 30 45  1  0  0  0  0
 31 30  1  0  0  0  0
 31 32  2  0  0  0  0
 32 43  1  0  0  0  0
 33 32  1  0  0  0  0
 33 41  2  0  0  0  0
 34 33  1  1  0  0  0
 35 34  1  0  0  0  0
 36 35  2  0  0  0  0
 36 40  1  0  0  0  0
 37 19  2  0  0  0  0
 37 36  1  0  0  0  0
 38 37  1  0  0  0  0
 39 38  1  0  0  0  0
 39 58  1  0  0  0  0
 39 40  2  0  0  0  0
 41 40  1  0  0  0  0
 42 41  1  0  0  0  0
 42 59  2  0  0  0  0
 43 42  1  0  0  0  0
 44 43  2  0  0  0  0
 44 61  1  0  0  0  0
 45 44  1  0  0  0  0
 46 45  2  0  0  0  0
 46 62  1  0  0  0  0
 47 46  1  0  0  0  0
 48 47  1  0  0  0  0
 48 64  1  0  0  0  0
 49 48  2  0  0  0  0
 50 49  1  0  0  0  0
 51 50  1  0  0  0  0
 51 65  2  0  0  0  0
 52 51  1  1  0  0  0
 53 52  1  0  0  0  0
 53 83  1  0  0  0  0
 53 54  1  6  0  0  0
 55 38  2  0  0  0  0
 55 54  1  0  0  0  0
 56 55  1  1  0  0  0
 56 83  1  0  0  0  0
 57 56  1  0  0  0  0
 57 85  1  0  0  0  0
 57 58  2  0  0  0  0
 59 58  1  0  0  0  0
 60 59  1  0  0  0  0
 60 85  2  0  0  0  0
 61 60  1  0  0  0  0
 61 62  2  0  0  0  0
 63 62  1  0  0  0  0
 64 63  2  0  0  0  0
 65 64  1  0  0  0  0
 66 65  1  1  0  0  0
 66 83  1  0  0  0  0
 67 66  1  0  0  0  0
 68 67  1  0  0  0  0
 69 68  1  0  0  0  0
 70 68  2  0  0  0  0
 71 67  2  0  0  0  0
 72 71  1  0  0  0  0
 73 72  1  0  0  0  0
 74 72  2  0  0  0  0
 75 71  1  0  0  0  0
 76 75  1  0  0  0  0
 77 76  2  0  0  0  0
 78 76  1  0  0  0  0
 79 75  2  0  0  0  0
 80 79  1  0  0  0  0
 81 80  1  0  0  0  0
 82 80  2  0  0  0  0
 83 79  1  6  0  0  0
 84 63  1  1  0  0  0
 84 66  1  0  0  0  0
 85 84  1  0  0  0  0
 86 21  2  0  0  0  0
 86 52  1  0  0  0  0
 87 50  2  0  0  0  0
 87 86  1  0  0  0  0
 88 87  1  0  0  0  0
 89  4  1  1  0  0  0
 89 31  1  0  0  0  0
 90 25  1  6  0  0  0
 90 89  1  0  0  0  0
M  END
60
 

 33 38  0  0  0  0  0  0  0  0999 V2000
   -7.9298    9.5302    0.0000 C   0  0  0  0  0  0  0  0  0  0  0  0
   -7.9230    8.7436    0.0000 C   0  0  0  0  0  0  0  0  0  0  0  0
   -7.0928    8.5024    0.0000 C   0  0  0  0  0  0  0  0  0  0  0  0
   -6.6427    9.1274    0.0000 N   0  0  0  0  0  0  0  0  0  0  0  0
   -7.1248    9.8064    0.0000 C   0  0  0  0  0  0  0  0  0  0  0  0
   -5.0287   11.6052    0.0000 C   0  0  0  0  0  0  0  0  0  0  0  0
   -5.8569   11.5980    0.0000 C   0  0  0  0  0  0  0  0  0  0  0  0
   -6.0987   10.8505    0.0000 C   0  0  0  0  0  0  0  0  0  0  0  0
   -5.4323   10.4008    0.0000 N   0  0  0  0  0  0  0  0  0  0  0  0
   -4.7529   10.8416    0.0000 C   0  0  0  0  0  0  0  0  0  0  0  0
   -6.9038   10.5743    0.0000 C   0  0  0  0  0  0  0  0  0  0  0  0
   -2.9131    8.7873    0.0000 C   0  0  0  0  0  0  0  0  0  0  0  0
   -2.9200    9.5739    0.0000 C   0  0  0  0  0  0  0  0  0  0  0  0
   -3.7297    9.8361    0.0000 C   0  0  0  0  0  0  0  0  0  0  0  0
   -4.1998    9.1487    0.0000 N   0  0  0  0  0  0  0  0  0  0  0  0
   -3.7390    8.5316    0.0000 C   0  0  0  0  0  0  0  0  0  0  0  0
   -3.9642   10.6000    0.0000 C   0  0  0  0  0  0  0  0  0  0  0  0
   -6.7991    7.7559    0.0000 C   0  0  0  0  0  0  0  0  0  0  0  0
   -3.8811    7.7616    0.0000 C   0  0  0  0  0  0  0  0  0  0  0  0
   -5.3625    7.0571    0.0000 N   0  0  0  0  0  0  0  0  0  0  0  0
   -4.6951    7.5421    0.0000 C   0  0  0  0  0  0  0  0  0  0  0  0
   -4.9500    8.3267    0.0000 C   0  0  0  0  0  0  0  0  0  0  0  0
   -5.7750    8.3267    0.0000 C   0  0  0  0  0  0  0  0  0  0  0  0
   -6.0299    7.5421    0.0000 C   0  0  0  0  0  0  0  0  0  0  0  0
   -5.3625    6.2321    0.0000 C   0  0  0  0  0  0  0  0  0  0  0  0
   -6.0770    5.8196    0.0000 C   0  0  0  0  0  0  0  0  0  0  0  0
   -6.0770    4.9946    0.0000 C   0  0  0  0  0  0  0  0  0  0  0  0
   -5.3625    4.5821    0.0000 C   0  0  0  0  0  0  0  0  0  0  0  0
   -4.6480    4.9946    0.0000 C   0  0  0  0  0  0  0  0  0  0  0  0
   -4.6480    5.8196    0.0000 C   0  0  0  0  0  0  0  0  0  0  0  0
   -5.3625    3.7571    0.0000 C   0  0  0  0  0  0  0  0  0  0  0  0
   -4.6480    3.3446    0.0000 C   0  0  0  0  0  0  0  0  0  0  0  0
   -6.0770    3.3446    0.0000 C   0  0  0  0  0  0  0  0  0  0  0  0
  1  2  1  0  0  0  0
  1  5  2  0  0  0  0
  2  3  2  0  0  0  0
  3  4  1  0  0  0  0
  3 18  1  0  0  0  0
  4  5  1  0  0  0  0
  5 11  1  0  0  0  0
  6  7  2  0  0  0  0
  6 10  1  0  0  0  0
  7  8  1  0  0  0  0
  8  9  1  0  0  0  0
  8 11  2  0  0  0  0
  9 10  1  0  0  0  0
 10 17  2  0  0  0  0
 12 13  1  0  0  0  0
 12 16  2  0  0  0  0
 13 14  2  0  0  0  0
 14 15  1  0  0  0  0
 14 17  1  0  0  0  0
 15 16  1  0  0  0  0
 16 19  1  0  0  0  0
 18 24  1  0  0  0  0
 20 21  1  0  0  0  0
 20 24  1  0  0  0  0
 20 25  1  0  0  0  0
 21 22  2  0  0  0  0
 21 19  1  0  0  0  0
 22 23  1  0  0  0  0
 23 24  2  0  0  0  0
 25 26  2  0  0  0  0
 25 30  1  0  0  0  0
 26 27  1  0  0  0  0
 27 28  2  0  0  0  0
 28 29  1  0  0  0  0
 28 31  1  0  0  0  0
 29 30  2  0  0  0  0
 31 32  1  0  0  0  0
 31 33  1  0  0  0  0
M  END
61
 

 42 45  0  0  0  0  0  0  0  0999 V2000
   -3.8107    6.6589    0.0000 C   0  0  0  0  0  0  0  0  0  0  0  0
   -4.5252    6.4036    0.0000 C   0  0  3  0  0  0  0  0  0  0  0  0
   -4.5252    5.5786    0.0000 C   0  0  0  0  0  0  0  0  0  0  0  0
   -3.8107    5.1661    0.0000 N   0  0  0  0  0  0  0  0  0  0  0  0
   -3.0962    5.5786    0.0000 C   0  0  0  0  0  0  0  0  0  0  0  0
   -3.0962    6.4036    0.0000 C   0  0  3  0  0  0  0  0  0  0  0  0
   -4.5252    7.3661    0.0000 C   0  0  3  0  0  0  0  0  0  0  0  0
   -3.8107    7.7786    0.0000 N   0  0  0  0  0  0  0  0  0  0  0  0
   -3.0962    7.3661    0.0000 C   0  0  3  0  0  0  0  0  0  0  0  0
   -5.1085    7.9494    0.0000 C   0  0  0  0  0  0  0  0  0  0  0  0
   -4.8950    8.7463    0.0000 C   0  0  0  0  0  0  0  0  0  0  0  0
   -5.4784    9.3297    0.0000 C   0  0  0  0  0  0  0  0  0  0  0  0
   -6.2753    9.1162    0.0000 C   0  0  0  0  0  0  0  0  0  0  0  0
   -6.4888    8.3193    0.0000 C   0  0  0  0  0  0  0  0  0  0  0  0
   -5.9054    7.7359    0.0000 C   0  0  0  0  0  0  0  0  0  0  0  0
   -2.5129    7.9494    0.0000 C   0  0  0  0  0  0  0  0  0  0  0  0
   -1.7160    7.7359    0.0000 C   0  0  0  0  0  0  0  0  0  0  0  0
   -1.1326    8.3193    0.0000 C   0  0  0  0  0  0  0  0  0  0  0  0
   -1.3461    9.1162    0.0000 C   0  0  0  0  0  0  0  0  0  0  0  0
   -2.1430    9.3297    0.0000 C   0  0  0  0  0  0  0  0  0  0  0  0
   -2.7264    8.7463    0.0000 C   0  0  0  0  0  0  0  0  0  0  0  0
   -3.8107    8.6036    0.0000 C   0  0  0  0  0  0  0  0  0  0  0  0
   -3.0962    9.0161    0.0000 C   0  0  0  0  0  0  0  0  0  0  0  0
   -4.5252    9.0161    0.0000 C   0  0  0  0  0  0  0  0  0  0  0  0
   -5.2397    5.9911    0.0000 C   0  0  0  0  0  0  0  0  0  0  0  0
   -2.3818    5.9911    0.0000 C   0  0  0  0  0  0  0  0  0  0  0  0
   -5.2397    5.1661    0.0000 O   0  0  0  0  0  0  0  0  0  0  0  0
   -5.9541    6.4036    0.0000 O   0  0  0  0  0  0  0  0  0  0  0  0
   -1.6673    6.4036    0.0000 O   0  0  0  0  0  0  0  0  0  0  0  0
   -2.3818    5.1661    0.0000 O   0  0  0  0  0  0  0  0  0  0  0  0
   -3.8107    4.3411    0.0000 C   0  0  0  0  0  0  0  0  0  0  0  0
   -3.0962    3.9286    0.0000 C   0  0  0  0  0  0  0  0  0  0  0  0
   -4.5252    3.9286    0.0000 C   0  0  0  0  0  0  0  0  0  0  0  0
   -6.1190    6.9390    0.0000 C   0  0  0  0  0  0  0  0  0  0  0  0
   -1.5025    6.9390    0.0000 C   0  0  0  0  0  0  0  0  0  0  0  0
   -2.2993    6.7255    0.0000 F   0  0  0  0  0  0  0  0  0  0  0  0
   -1.2889    6.1421    0.0000 F   0  0  0  0  0  0  0  0  0  0  0  0
   -0.7056    7.1526    0.0000 F   0  0  0  0  0  0  0  0  0  0  0  0
   -6.3325    6.1422    0.0000 F   0  0  0  0  0  0  0  0  0  0  0  0
   -5.3221    6.7255    0.0000 F   0  0  0  0  0  0  0  0  0  0  0  0
   -6.9159    7.1526    0.0000 F   0  0  0  0  0  0  0  0  0  0  0  0
   -3.8107    7.3857    0.0000 O   0  0  0  0  0  0  0  0  0  0  0  0
  1  2  1  0  0  0  0
  1  6  1  0  0  0  0
  1 42  2  0  0  0  0
  2  3  1  0  0  0  0
  2  7  1  0  0  0  0
  2 25  1  0  0  0  0
  3  4  1  0  0  0  0
  4  5  1  0  0  0  0
  4 31  1  0  0  0  0
  5  6  1  0  0  0  0
  6 26  1  0  0  0  0
  7  8  1  0  0  0  0
  7 10  1  0  0  0  0
  8  9  1  0  0  0  0
  8 22  1  0  0  0  0
  9  6  1  0  0  0  0
  9 16  1  0  0  0  0
 10 11  2  0  0  0  0
 10 15  1  0  0  0  0
 11 12  1  0  0  0  0
 12 13  2  0  0  0  0
 13 14  1  0  0  0  0
 14 15  2  0  0  0  0
 15 34  1  0  0  0  0
 16 17  2  0  0  0  0
 16 21  1  0  0  0  0
 17 18  1  0  0  0  0
 17 35  1  0  0  0  0
 18 19  2  0  0  0  0
 19 20  1  0  0  0  0
 20 21  2  0  0  0  0
 22 23  1  0  0  0  0
 22 24  1  0  0  0  0
 25 27  1  0  0  0  0
 25 28  2  0  0  0  0
 26 29  2  0  0  0  0
 26 30  1  0  0  0  0
 31 32  1  0  0  0  0
 31 33  1  0  0  0  0
 34 39  1  0  0  0  0
 34 40  1  0  0  0  0
 34 41  1  0  0  0  0
 35 36  1  0  0  0  0
 35 37  1  0  0  0  0
 35 38  1  0  0  0  0
M  END
62
 

 43 50  0  0  0  0  0  0  0  0999 V2000
   -3.1120    0.6438    0.0000 C   0  0  0  0  0  0  0  0  0  0  0  0
   -3.9370    0.6438    0.0000 C   0  0  0  0  0  0  0  0  0  0  0  0
   -4.3495   -0.0707    0.0000 C   0  0  0  0  0  0  0  0  0  0  0  0
   -3.9370   -0.7852    0.0000 C   0  0  0  0  0  0  0  0  0  0  0  0
   -3.1120   -0.7852    0.0000 C   0  0  0  0  0  0  0  0  0  0  0  0
   -2.6995   -0.0707    0.0000 C   0  0  0  0  0  0  0  0  0  0  0  0
   -1.8745    1.3583    0.0000 C   0  0  3  0  0  0  0  0  0  0  0  0
   -2.6995    1.3583    0.0000 C   0  0  3  0  0  0  0  0  0  0  0  0
   -1.8745   -0.0707    0.0000 C   0  0  3  0  0  0  0  0  0  0  0  0
   -1.4620    0.6438    0.0000 C   0  0  3  0  0  0  0  0  0  0  0  0
   -0.7745    0.1724    0.0000 C   0  0  0  0  0  0  0  0  0  0  0  0
   -0.4406   -0.5421    0.0000 C   0  0  0  0  0  0  0  0  0  0  0  0
   -2.2747   -1.2762    0.0000 O   0  0  0  0  0  0  0  0  0  0  0  0
   -0.8654    0.5382    0.0000 C   0  0  3  0  0  0  0  0  0  0  0  0
   -0.7868    1.4222    0.0000 C   0  0  3  0  0  0  0  0  0  0  0  0
   -1.3761    1.9672    0.0000 N   0  0  0  0  0  0  0  0  0  0  0  0
   -0.1902    0.0641    0.0000 C   0  0  0  0  0  0  0  0  0  0  0  0
    0.5580    0.4117    0.0000 C   0  0  3  0  0  0  0  0  0  0  0  0
    0.6310    1.2334    0.0000 C   0  0  3  0  0  0  0  0  0  0  0  0
   -0.0441    1.7076    0.0000 C   0  0  0  0  0  0  0  0  0  0  0  0
    1.2331   -0.0625    0.0000 C   0  0  0  0  0  0  0  0  0  0  0  0
    1.9813    0.2851    0.0000 C   0  0  0  0  0  0  0  0  0  0  0  0
    2.0544    1.1069    0.0000 C   0  0  0  0  0  0  0  0  0  0  0  0
    1.3792    1.5810    0.0000 C   0  0  0  0  0  0  0  0  0  0  0  0
    1.4523    2.4028    0.0000 C   0  0  0  0  0  0  0  0  0  0  0  0
    1.1601   -0.8842    0.0000 C   0  0  0  0  0  0  0  0  0  0  0  0
   -1.4620   -0.7852    0.0000 C   0  0  3  0  0  0  0  0  0  0  0  0
   -0.7475   -1.1977    0.0000 C   0  0  3  0  0  0  0  0  0  0  0  0
   -4.3495    1.3582    0.0000 C   0  0  0  0  0  0  0  0  0  0  0  0
   -3.9370    2.0727    0.0000 C   0  0  0  0  0  0  0  0  0  0  0  0
   -4.3495    2.7872    0.0000 C   0  0  0  0  0  0  0  0  0  0  0  0
   -5.1745    2.7872    0.0000 C   0  0  0  0  0  0  0  0  0  0  0  0
   -5.5870    2.0727    0.0000 C   0  0  0  0  0  0  0  0  0  0  0  0
   -5.1745    1.3582    0.0000 C   0  0  0  0  0  0  0  0  0  0  0  0
   -2.9130    2.1552    0.0000 C   0  0  0  0  0  0  0  0  0  0  0  0
   -2.3296    2.7385    0.0000 C   0  0  0  0  0  0  0  0  0  0  0  0
   -2.5432    3.5354    0.0000 C   0  0  0  0  0  0  0  0  0  0  0  0
   -3.3401    3.7490    0.0000 C   0  0  0  0  0  0  0  0  0  0  0  0
   -3.9234    3.1656    0.0000 C   0  0  0  0  0  0  0  0  0  0  0  0
   -3.7099    2.3687    0.0000 C   0  0  0  0  0  0  0  0  0  0  0  0
   -1.3761    2.7922    0.0000 C   0  0  0  0  0  0  0  0  0  0  0  0
   -0.5001   -1.9847    0.0000 O   0  0  0  0  0  0  0  0  0  0  0  0
   -4.3495   -1.4997    0.0000 O   0  0  0  0  0  0  0  0  0  0  0  0
  1  2  2  0  0  0  0
  1  6  1  0  0  0  0
  2  3  1  0  0  0  0
  2 29  1  0  0  0  0
  3  4  2  0  0  0  0
  4  5  1  0  0  0  0
  4 43  1  0  0  0  0
  5  6  2  0  0  0  0
  6  9  1  0  0  0  0
  7  8  1  0  0  0  0
  7 10  1  0  0  0  0
  7 16  1  0  0  0  0
  8  1  1  0  0  0  0
  8 35  1  0  0  0  0
  9 10  1  0  0  0  0
  9 14  1  0  0  0  0
  9 27  1  0  0  0  0
 11 12  2  0  0  0  0
 11 10  1  0  0  0  0
 13  5  1  0  0  0  0
 13 27  1  0  0  0  0
 14 15  1  0  0  0  0
 14 17  1  0  0  0  0
 15 16  1  0  0  0  0
 15 20  1  0  0  0  0
 16 41  1  0  0  0  0
 17 18  1  0  0  0  0
 18 19  1  0  0  0  0
 18 21  1  0  0  0  0
 19 20  1  0  0  0  0
 19 24  1  0  0  0  0
 21 22  1  0  0  0  0
 21 26  1  0  0  0  0
 23 24  1  0  0  0  0
 24 25  1  0  0  0  0
 27 28  1  0  0  0  0
 28 12  1  0  0  0  0
 28 42  1  0  0  0  0
 29 30  2  0  0  0  0
 29 34  1  0  0  0  0
 30 31  1  0  0  0  0
 31 32  2  0  0  0  0
 32 33  1  0  0  0  0
 33 34  2  0  0  0  0
 35 36  2  0  0  0  0
 35 40  1  0  0  0  0
 36 37  1  0  0  0  0
 37 38  2  0  0  0  0
 38 39  1  0  0  0  0
 39 40  2  0  0  0  0
M  END
63
 

 19 24  0  0  0  0  0  0  0  0999 V2000
   -0.5835    6.8543    0.0000 C   0  0  0  0  0  0  0  0  0  0  0  0
   -0.5835    6.0303    0.0000 O   0  0  3  0  0  0  0  0  0  0  0  0
    0.8450    6.8543    0.0000 O   0  0  3  0  0  0  0  0  0  0  0  0
    0.1298    7.2682    0.0000 C   0  0  0  0  0  0  0  0  0  0  0  0
    2.2735    6.0303    0.0000 O   0  0  3  0  0  0  0  0  0  0  0  0
    2.2735    6.8543    0.0000 C   0  0  0  0  0  0  0  0  0  0  0  0
    1.5583    7.2682    0.0000 C   0  0  0  0  0  0  0  0  0  0  0  0
    2.2735    4.3785    0.0000 O   0  0  3  0  0  0  0  0  0  0  0  0
    2.9887    4.7924    0.0000 C   0  0  0  0  0  0  0  0  0  0  0  0
    2.9887    5.6183    0.0000 C   0  0  0  0  0  0  0  0  0  0  0  0
   -1.2969    5.6183    0.0000 C   0  0  0  0  0  0  0  0  0  0  0  0
   -1.2969    4.7924    0.0000 C   0  0  0  0  0  0  0  0  0  0  0  0
   -0.5835    4.3803    0.0000 O   0  0  3  0  0  0  0  0  0  0  0  0
   -0.5835    3.5581    0.0000 C   0  0  0  0  0  0  0  0  0  0  0  0
    0.1280    3.1479    0.0000 C   0  0  0  0  0  0  0  0  0  0  0  0
    0.8414    3.5581    0.0000 O   0  0  3  0  0  0  0  0  0  0  0  0
    1.5583    3.1388    0.0000 C   0  0  0  0  0  0  0  0  0  0  0  0
    2.2735    3.5527    0.0000 C   0  0  0  0  0  0  0  0  0  0  0  0
    0.8446    5.2054    0.0000 Na  0  0  0  0  0  0  0  0  0  0  0  0
  1  2  1  0  0  0  0
  1  4  1  0  0  0  0
  2 11  1  0  0  0  0
  3  4  1  0  0  0  0
  3  7  1  0  0  0  0
  5  6  1  0  0  0  0
  5 10  1  0  0  0  0
  6  7  1  0  0  0  0
  8  9  1  0  0  0  0
  8 18  1  0  0  0  0
  9 10  1  0  0  0  0
 11 12  1  0  0  0  0
 12 13  1  0  0  0  0
 13 14  1  0  0  0  0
 14 15  1  0  0  0  0
 15 16  1  0  0  0  0
 16 17  1  0  0  0  0
 17 18  1  0  0  0  0
 19  5  1  0  0  0  0
 19  3  1  0  0  0  0
 19  2  1  0  0  0  0
 19 13  1  0  0  0  0
 19 16  1  0  0  0  0
 19  8  1  0  0  0  0
M  END
64
 

 43 54  0  0  0  0  0  0  0  0999 V2000
    0.8486   -1.1432    0.0000 C   0  0  0  0  0  0  0  0  0  0  0  0
    0.1341   -0.7307    0.0000 N   0  0  0  0  0  0  0  0  0  0  0  0
   -0.5804   -1.1432    0.0000 C   0  0  0  0  0  0  0  0  0  0  0  0
   -0.5804   -1.9682    0.0000 C   0  0  0  0  0  0  0  0  0  0  0  0
    0.1341   -2.3807    0.0000 C   0  0  0  0  0  0  0  0  0  0  0  0
    0.8486   -1.9682    0.0000 C   0  0  0  0  0  0  0  0  0  0  0  0
    1.5630   -2.3807    0.0000 C   0  0  0  0  0  0  0  0  0  0  0  0
    2.2776   -1.9682    0.0000 C   0  0  0  0  0  0  0  0  0  0  0  0
    2.2776   -1.1432    0.0000 C   0  0  0  0  0  0  0  0  0  0  0  0
    1.5630   -0.7307    0.0000 C   0  0  0  0  0  0  0  0  0  0  0  0
    1.5630    0.0943    0.0000 N   0  0  0  0  0  0  0  0  0  0  0  0
    2.2775    0.5068    0.0000 C   0  0  0  0  0  0  0  0  0  0  0  0
    2.9920    0.0943    0.0000 C   0  0  0  0  0  0  0  0  0  0  0  0
    2.9920   -0.7307    0.0000 C   0  0  0  0  0  0  0  0  0  0  0  0
   -2.0093    1.3318    0.0000 C   0  0  0  0  0  0  0  0  0  0  0  0
   -1.2948    1.7443    0.0000 N   0  0  0  0  0  0  0  0  0  0  0  0
   -1.2948    2.5693    0.0000 C   0  0  0  0  0  0  0  0  0  0  0  0
   -2.0093    2.9818    0.0000 C   0  0  0  0  0  0  0  0  0  0  0  0
   -2.7238    2.5693    0.0000 C   0  0  0  0  0  0  0  0  0  0  0  0
   -2.7238    1.7443    0.0000 C   0  0  0  0  0  0  0  0  0  0  0  0
   -3.4382    1.3318    0.0000 C   0  0  0  0  0  0  0  0  0  0  0  0
   -3.4383    0.5068    0.0000 C   0  0  0  0  0  0  0  0  0  0  0  0
   -2.7238    0.0943    0.0000 C   0  0  0  0  0  0  0  0  0  0  0  0
   -2.0093    0.5068    0.0000 C   0  0  0  0  0  0  0  0  0  0  0  0
   -1.2948    0.0943    0.0000 N   0  0  0  0  0  0  0  0  0  0  0  0
   -1.2948   -0.7307    0.0000 C   0  0  0  0  0  0  0  0  0  0  0  0
   -2.0092   -1.1432    0.0000 C   0  0  0  0  0  0  0  0  0  0  0  0
   -2.7237   -0.7307    0.0000 C   0  0  0  0  0  0  0  0  0  0  0  0
    1.5630    2.5693    0.0000 C   0  0  0  0  0  0  0  0  0  0  0  0
    1.5630    1.7443    0.0000 N   0  0  0  0  0  0  0  0  0  0  0  0
    2.2775    1.3317    0.0000 C   0  0  0  0  0  0  0  0  0  0  0  0
    2.9920    1.7442    0.0000 C   0  0  0  0  0  0  0  0  0  0  0  0
    2.9920    2.5693    0.0000 C   0  0  0  0  0  0  0  0  0  0  0  0
    2.2775    2.9818    0.0000 C   0  0  0  0  0  0  0  0  0  0  0  0
    2.2775    3.8067    0.0000 C   0  0  0  0  0  0  0  0  0  0  0  0
    1.5630    4.2193    0.0000 C   0  0  0  0  0  0  0  0  0  0  0  0
    0.8485    3.8068    0.0000 C   0  0  0  0  0  0  0  0  0  0  0  0
    0.8486    2.9817    0.0000 C   0  0  0  0  0  0  0  0  0  0  0  0
    0.1341    2.5692    0.0000 N   0  0  0  0  0  0  0  0  0  0  0  0
   -0.5804    2.9817    0.0000 C   0  0  0  0  0  0  0  0  0  0  0  0
   -0.5804    3.8067    0.0000 C   0  0  0  0  0  0  0  0  0  0  0  0
    0.1340    4.2192    0.0000 C   0  0  0  0  0  0  0  0  0  0  0  0
    0.1341    0.9193    0.0000 Fe  0  0  0  0  0  0  0  0  0  0  0  0
  1  2  2  0  0  0  0
  1  6  1  0  0  0  0
  1 10  1  0  0  0  0
  2  3  1  0  0  0  0
  2 43  1  0  0  0  0
  3  4  2  0  0  0  0
  4  5  1  0  0  0  0
  5  6  2  0  0  0  0
  6  7  1  0  0  0  0
  7  8  2  0  0  0  0
  8  9  1  0  0  0  0
  9 10  2  0  0  0  0
  9 14  1  0  0  0  0
 10 11  1  0  0  0  0
 11 12  2  0  0  0  0
 11 43  1  0  0  0  0
 12 13  1  0  0  0  0
 13 14  2  0  0  0  0
 15 16  2  0  0  0  0
 15 20  1  0  0  0  0
 15 24  1  0  0  0  0
 16 17  1  0  0  0  0
 17 18  2  0  0  0  0
 18 19  1  0  0  0  0
 19 20  2  0  0  0  0
 20 21  1  0  0  0  0
 21 22  2  0  0  0  0
 22 23  1  0  0  0  0
 23 24  2  0  0  0  0
 23 28  1  0  0  0  0
 24 25  1  0  0  0  0
 25 26  2  0  0  0  0
 26 27  1  0  0  0  0
 27 28  2  0  0  0  0
 29 30  2  0  0  0  0
 29 34  1  0  0  0  0
 29 38  1  0  0  0  0
 30 31  1  0  0  0  0
 31 32  2  0  0  0  0
 32 33  1  0  0  0  0
 33 34  2  0  0  0  0
 34 35  1  0  0  0  0
 35 36  2  0  0  0  0
 36 37  1  0  0  0  0
 37 38  2  0  0  0  0
 37 42  1  0  0  0  0
 38 39  1  0  0  0  0
 39 40  2  0  0  0  0
 40 41  1  0  0  0  0
 41 42  2  0  0  0  0
 43 16  1  0  0  0  0
 43 39  1  0  0  0  0
 43 30  1  0  0  0  0
 43 25  1  0  0  0  0
M  END
65
 

 69 80  0  0  0  0  0  0  0  0999 V2000
    7.5527    4.2734   -0.0002 O   0  0  0  0  0  0  0  0  0  0  0  0
    9.1470    4.3376   -0.0007 C   0  0  0  0  0  0  0  0  0  0  0  0
    9.9393    2.9515   -0.0251 C   0  0  0  0  0  0  0  0  0  0  0  0
    9.1497    1.5630   -0.0001 C   0  0  0  0  0  0  0  0  0  0  0  0
    7.5543    1.6152   -0.0000 O   0  0  0  0  0  0  0  0  0  0  0  0
    4.9800    2.9393   -0.0005 Eu  0  0  0  0  0  0  0  0  0  0  0  0
    6.2969    5.5145    0.0010 O   0  0  0  0  0  0  0  0  0  0  0  0
    6.3695    7.1094    0.0030 C   0  0  0  0  0  0  0  0  0  0  0  0
    4.9852    7.9003   -0.0296 C   0  0  0  0  0  0  0  0  0  0  0  0
    3.5770    7.1205    0.0036 C   0  0  0  0  0  0  0  0  0  0  0  0
    3.6424    5.5158    0.0004 O   0  0  0  0  0  0  0  0  0  0  0  0
    2.3566    8.1191    0.0012 C   0  0  0  0  0  0  0  0  0  0  0  0
    2.8246    9.6993   -0.0117 C   0  0  0  0  0  0  0  0  0  0  0  0
    1.7632   10.8242   -0.0200 C   0  0  0  0  0  0  0  0  0  0  0  0
    0.2154   10.4930    0.0251 C   0  0  0  0  0  0  0  0  0  0  0  0
   -0.2332    8.9881    0.0148 C   0  0  0  0  0  0  0  0  0  0  0  0
    0.9029    7.8425    0.0198 C   0  0  0  0  0  0  0  0  0  0  0  0
    7.5874    8.1101    0.0045 C   0  0  0  0  0  0  0  0  0  0  0  0
    9.0703    7.8060    0.0085 C   0  0  0  0  0  0  0  0  0  0  0  0
   10.1937    8.9574    0.0069 C   0  0  0  0  0  0  0  0  0  0  0  0
    9.7604   10.4677    0.0103 C   0  0  0  0  0  0  0  0  0  0  0  0
    8.2078   10.8213   -0.0029 C   0  0  0  0  0  0  0  0  0  0  0  0
    7.1308    9.6958   -0.0018 C   0  0  0  0  0  0  0  0  0  0  0  0
    2.4020    4.2615   -0.0015 O   0  0  0  0  0  0  0  0  0  0  0  0
    0.8013    4.3327   -0.0020 C   0  0  0  0  0  0  0  0  0  0  0  0
    0.0182    2.9289    0.0374 C   0  0  0  0  0  0  0  0  0  0  0  0
    0.8074    1.5405   -0.0005 C   0  0  0  0  0  0  0  0  0  0  0  0
    2.3979    1.6095   -0.0014 O   0  0  0  0  0  0  0  0  0  0  0  0
   -0.1964    0.3289   -0.0087 C   0  0  0  0  0  0  0  0  0  0  0  0
    0.0810   -1.1656    0.0142 C   0  0  0  0  0  0  0  0  0  0  0  0
   -1.0712   -2.2777    0.0109 C   0  0  0  0  0  0  0  0  0  0  0  0
   -2.5791   -1.8281    0.0166 C   0  0  0  0  0  0  0  0  0  0  0  0
   -2.9090   -0.2716   -0.0093 C   0  0  0  0  0  0  0  0  0  0  0  0
   -1.7897    0.7958   -0.0064 C   0  0  0  0  0  0  0  0  0  0  0  0
   -0.1901    5.5569   -0.0065 C   0  0  0  0  0  0  0  0  0  0  0  0
    0.0979    7.0117   -0.0037 C   0  0  0  0  0  0  0  0  0  0  0  0
   -1.0440    8.1551   -0.0023 C   0  0  0  0  0  0  0  0  0  0  0  0
   -2.5490    7.7152   -0.0033 C   0  0  0  0  0  0  0  0  0  0  0  0
   -2.8923    6.1698    0.0001 C   0  0  0  0  0  0  0  0  0  0  0  0
   -1.7724    5.0992    0.0007 C   0  0  0  0  0  0  0  0  0  0  0  0
    3.6610    0.3648   -0.0003 O   0  0  0  0  0  0  0  0  0  0  0  0
    3.6045   -1.2263   -0.0033 C   0  0  0  0  0  0  0  0  0  0  0  0
    4.9863   -2.0210    0.0320 C   0  0  0  0  0  0  0  0  0  0  0  0
    6.3786   -1.2330   -0.0018 C   0  0  0  0  0  0  0  0  0  0  0  0
    6.3171    0.3579   -0.0015 O   0  0  0  0  0  0  0  0  0  0  0  0
    7.6013   -2.2411   -0.0072 C   0  0  0  0  0  0  0  0  0  0  0  0
    7.1228   -3.8307   -0.0025 C   0  0  0  0  0  0  0  0  0  0  0  0
    8.1912   -4.9569   -0.0073 C   0  0  0  0  0  0  0  0  0  0  0  0
    9.7470   -4.6251    0.0101 C   0  0  0  0  0  0  0  0  0  0  0  0
   10.1966   -3.1109    0.0042 C   0  0  0  0  0  0  0  0  0  0  0  0
    9.0848   -1.9593    0.0041 C   0  0  0  0  0  0  0  0  0  0  0  0
    2.3840   -2.2259   -0.0002 C   0  0  0  0  0  0  0  0  0  0  0  0
    0.8931   -1.9337   -0.0225 C   0  0  0  0  0  0  0  0  0  0  0  0
   -0.2303   -3.0764   -0.0190 C   0  0  0  0  0  0  0  0  0  0  0  0
    0.2097   -4.5880   -0.0362 C   0  0  0  0  0  0  0  0  0  0  0  0
    1.7627   -4.9330    0.0330 C   0  0  0  0  0  0  0  0  0  0  0  0
    2.8384   -3.8203    0.0180 C   0  0  0  0  0  0  0  0  0  0  0  0
   10.1537    0.3326    0.0023 C   0  0  0  0  0  0  0  0  0  0  0  0
   11.7450    0.7981   -0.0005 C   0  0  0  0  0  0  0  0  0  0  0  0
   12.8613   -0.2795   -0.0005 C   0  0  0  0  0  0  0  0  0  0  0  0
   12.5162   -1.8320   -0.0012 C   0  0  0  0  0  0  0  0  0  0  0  0
   10.9954   -2.2672   -0.0007 C   0  0  0  0  0  0  0  0  0  0  0  0
    9.8559   -1.1440   -0.0016 C   0  0  0  0  0  0  0  0  0  0  0  0
   10.1543    5.5533    0.0023 C   0  0  0  0  0  0  0  0  0  0  0  0
   11.7379    5.0865    0.0008 C   0  0  0  0  0  0  0  0  0  0  0  0
   12.8714    6.1533    0.0002 C   0  0  0  0  0  0  0  0  0  0  0  0
   12.5287    7.7095   -0.0044 C   0  0  0  0  0  0  0  0  0  0  0  0
   11.0210    8.1552   -0.0031 C   0  0  0  0  0  0  0  0  0  0  0  0
    9.8631    7.0386   -0.0064 C   0  0  0  0  0  0  0  0  0  0  0  0
  1  6  1  0  0  0  0
  2  1  1  0  0  0  0
  3  2  2  0  0  0  0
  4  3  1  0  0  0  0
  5  4  2  0  0  0  0
  6  5  1  0  0  0  0
  6 11  1  0  0  0  0
  6 28  1  0  0  0  0
  6 45  1  0  0  0  0
  7  6  1  0  0  0  0
  8  7  1  0  0  0  0
  8  9  2  0  0  0  0
 10  9  1  0  0  0  0
 10 11  2  0  0  0  0
 12 10  1  0  0  0  0
 13 12  1  0  0  0  0
 13 14  2  0  0  0  0
 15 14  1  0  0  0  0
 15 16  2  0  0  0  0
 17 12  2  0  0  0  0
 17 16  1  0  0  0  0
 18  8  1  0  0  0  0
 19 18  1  0  0  0  0
 19 20  2  0  0  0  0
 21 20  1  0  0  0  0
 21 22  2  0  0  0  0
 23 18  2  0  0  0  0
 23 22  1  0  0  0  0
 24  6  1  0  0  0  0
 24 25  2  0  0  0  0
 26 25  1  0  0  0  0
 26 27  2  0  0  0  0
 28 27  1  0  0  0  0
 29 27  1  0  0  0  0
 29 34  2  0  0  0  0
 30 29  1  0  0  0  0
 31 30  2  0  0  0  0
 32 31  1  0  0  0  0
 33 32  2  0  0  0  0
 34 33  1  0  0  0  0
 35 25  1  0  0  0  0
 36 35  1  0  0  0  0
 36 37  2  0  0  0  0
 38 37  1  0  0  0  0
 38 39  2  0  0  0  0
 40 35  2  0  0  0  0
 40 39  1  0  0  0  0
 41  6  1  0  0  0  0
 41 42  2  0  0  0  0
 43 42  1  0  0  0  0
 43 44  2  0  0  0  0
 45 44  1  0  0  0  0
 46 44  1  0  0  0  0
 47 46  1  0  0  0  0
 47 48  2  0  0  0  0
 49 48  1  0  0  0  0
 49 50  2  0  0  0  0
 51 46  2  0  0  0  0
 51 50  1  0  0  0  0
 52 42  1  0  0  0  0
 53 52  1  0  0  0  0
 53 54  2  0  0  0  0
 55 54  1  0  0  0  0
 55 56  2  0  0  0  0
 57 52  2  0  0  0  0
 57 56  1  0  0  0  0
 58  4  1  0  0  0  0
 58 63  2  0  0  0  0
 59 58  1  0  0  0  0
 60 59  2  0  0  0  0
 61 60  1  0  0  0  0
 62 61  2  0  0  0  0
 63 62  1  0  0  0  0
 64  2  1  0  0  0  0
 65 64  1  0  0  0  0
 65 66  2  0  0  0  0
 67 66  1  0  0  0  0
 67 68  2  0  0  0  0
 69 64  2  0  0  0  0
 69 68  1  0  0  0  0
M  END
66
 

 31 43  0  0  0  0  0  0  0  0999 V2000
   -3.5554    0.3388    0.0000 C   0  0  0  0  0  0  0  0  0  0  0  0
   -4.2036   -0.3757    0.0000 Ru  0  0  0  0  0  0  0  0  0  0  0  0
   -2.8875   -0.3757    0.0000 Ru  0  0  0  0  0  0  0  0  0  0  0  0
   -3.5554   -1.0901    0.0000 N   0  0  0  0  0  0  0  0  0  0  0  0
   -3.5554   -1.9151    0.0000 C   0  0  0  0  0  0  0  0  0  0  0  0
   -4.2699   -2.3276    0.0000 C   0  0  0  0  0  0  0  0  0  0  0  0
   -4.2699   -3.1527    0.0000 C   0  0  0  0  0  0  0  0  0  0  0  0
   -3.5554   -3.5652    0.0000 C   0  0  0  0  0  0  0  0  0  0  0  0
   -2.8409   -3.1527    0.0000 C   0  0  0  0  0  0  0  0  0  0  0  0
   -2.8409   -2.3277    0.0000 C   0  0  0  0  0  0  0  0  0  0  0  0
   -3.5554    1.1638    0.0000 O   0  0  0  0  0  0  0  0  0  0  0  0
   -5.4464   -0.3732    0.0000 C   0  0  3  0  0  0  0  0  0  0  0  0
   -5.7153    0.2942    0.0000 C   0  0  3  0  0  0  0  0  0  0  0  0
   -6.0088    0.0393    0.0000 C   0  0  3  0  0  0  0  0  0  0  0  0
   -6.0088   -0.7857    0.0000 C   0  0  3  0  0  0  0  0  0  0  0  0
   -5.7153   -1.0406    0.0000 C   0  0  3  0  0  0  0  0  0  0  0  0
   -6.4115   -0.3647    0.0000 C   0  0  0  0  0  0  0  0  0  0  0  0
   -5.9328    1.0900    0.0000 C   0  0  0  0  0  0  0  0  0  0  0  0
   -6.7595    0.3816    0.0000 C   0  0  0  0  0  0  0  0  0  0  0  0
   -6.7233   -1.1982    0.0000 C   0  0  0  0  0  0  0  0  0  0  0  0
   -5.9246   -1.8386    0.0000 C   0  0  0  0  0  0  0  0  0  0  0  0
   -1.6446   -0.3781    0.0000 C   0  0  3  0  0  0  0  0  0  0  0  0
   -1.3758   -1.0455    0.0000 C   0  0  3  0  0  0  0  0  0  0  0  0
   -1.0823   -0.7906    0.0000 C   0  0  3  0  0  0  0  0  0  0  0  0
   -1.0823    0.0344    0.0000 C   0  0  3  0  0  0  0  0  0  0  0  0
   -1.3758    0.2893    0.0000 C   0  0  3  0  0  0  0  0  0  0  0  0
   -0.6796   -0.3866    0.0000 C   0  0  0  0  0  0  0  0  0  0  0  0
   -1.1582   -1.8413    0.0000 C   0  0  0  0  0  0  0  0  0  0  0  0
   -0.3316   -1.1329    0.0000 C   0  0  0  0  0  0  0  0  0  0  0  0
   -0.3678    0.4469    0.0000 C   0  0  0  0  0  0  0  0  0  0  0  0
   -1.1665    1.0873    0.0000 C   0  0  0  0  0  0  0  0  0  0  0  0
  1  2  1  0  0  0  0
  1 11  2  0  0  0  0
  2  3  2  0  0  0  0
  2  4  1  0  0  0  0
  3  1  1  0  0  0  0
  4  3  1  0  0  0  0
  4  5  1  0  0  0  0
  5  6  2  0  0  0  0
  5 10  1  0  0  0  0
  6  7  1  0  0  0  0
  7  8  2  0  0  0  0
  8  9  1  0  0  0  0
  9 10  2  0  0  0  0
 12 13  1  0  0  0  0
 12 16  1  0  0  0  0
 12  2  1  0  0  0  0
 12 17  1  0  0  0  0
 13 14  1  0  0  0  0
 13  2  1  0  0  0  0
 13 18  1  0  0  0  0
 14 15  1  0  0  0  0
 14  2  1  0  0  0  0
 14 19  1  0  0  0  0
 15 16  1  0  0  0  0
 15  2  1  0  0  0  0
 15 20  1  0  0  0  0
 16  2  1  0  0  0  0
 16 21  1  0  0  0  0
 22 23  1  0  0  0  0
 22 26  1  0  0  0  0
 22 27  1  0  0  0  0
 22  3  1  0  0  0  0
 23 24  1  0  0  0  0
 23 28  1  0  0  0  0
 23  3  1  0  0  0  0
 24 25  1  0  0  0  0
 24 29  1  0  0  0  0
 24  3  1  0  0  0  0
 25 26  1  0  0  0  0
 25 30  1  0  0  0  0
 25  3  1  0  0  0  0
 26 31  1  0  0  0  0
 26  3  1  0  0  0  0
M  END
67
 

 56 64  0  0  0  0  0  0  0  0999 V2000
    1.5616   -0.7071    0.0000 N   0  0  0  0  0  0  0  0  0  0  0  0
    0.8471   -1.1196    0.0000 C   0  0  0  0  0  0  0  0  0  0  0  0
    0.8471   -1.9447    0.0000 C   0  0  0  0  0  0  0  0  0  0  0  0
    1.5616   -2.3572    0.0000 C   0  0  0  0  0  0  0  0  0  0  0  0
    2.2761   -1.9447    0.0000 O   0  0  0  0  0  0  0  0  0  0  0  0
    2.7279   -1.3750    0.0000 Re  0  0  0  0  0  0  0  0  0  0  0  0
    1.5616    0.1179    0.0000 C   0  0  0  0  0  0  0  0  0  0  0  0
    2.2761    0.5304    0.0000 N   0  0  0  0  0  0  0  0  0  0  0  0
    2.9905    0.1179    0.0000 C   0  0  0  0  0  0  0  0  0  0  0  0
    2.9905   -0.7071    0.0000 S   0  0  0  0  0  0  0  0  0  0  0  0
    0.1327   -0.7071    0.0000 C   0  0  0  0  0  0  0  0  0  0  0  0
   -0.5818   -1.1196    0.0000 C   0  0  0  0  0  0  0  0  0  0  0  0
   -0.5818   -1.9447    0.0000 C   0  0  0  0  0  0  0  0  0  0  0  0
    0.1327   -2.3572    0.0000 C   0  0  0  0  0  0  0  0  0  0  0  0
    0.8471    0.5304    0.0000 C   0  0  0  0  0  0  0  0  0  0  0  0
    0.8471    1.3554    0.0000 C   0  0  0  0  0  0  0  0  0  0  0  0
    0.1326    1.7679    0.0000 C   0  0  0  0  0  0  0  0  0  0  0  0
   -0.5818    1.3554    0.0000 C   0  0  0  0  0  0  0  0  0  0  0  0
   -0.5818    0.5304    0.0000 C   0  0  0  0  0  0  0  0  0  0  0  0
    0.1327    0.1179    0.0000 C   0  0  0  0  0  0  0  0  0  0  0  0
    3.7050    0.5304    0.0000 N   0  0  0  0  0  0  0  0  0  0  0  0
    4.4195    0.1179    0.0000 C   0  0  0  0  0  0  0  0  0  0  0  0
    5.1340    0.5304    0.0000 C   0  0  0  0  0  0  0  0  0  0  0  0
    4.4195    1.7679    0.0000 C   0  0  0  0  0  0  0  0  0  0  0  0
    3.7050    1.3554    0.0000 C   0  0  0  0  0  0  0  0  0  0  0  0
    1.5616   -3.1822    0.0000 O   0  0  0  0  0  0  0  0  0  0  0  0
    3.6103   -4.4514    0.0000 N   0  0  0  0  0  0  0  0  0  0  0  0
    4.3248   -4.0389    0.0000 C   0  0  0  0  0  0  0  0  0  0  0  0
    4.3248   -3.2138    0.0000 C   0  0  0  0  0  0  0  0  0  0  0  0
    3.6103   -2.8013    0.0000 C   0  0  0  0  0  0  0  0  0  0  0  0
    2.8958   -3.2138    0.0000 O   0  0  0  0  0  0  0  0  0  0  0  0
    2.5423   -3.8031    0.0000 Re  0  0  0  0  0  0  0  0  0  0  0  0
    3.6103   -5.2764    0.0000 C   0  0  0  0  0  0  0  0  0  0  0  0
    2.8958   -5.6889    0.0000 N   0  0  0  0  0  0  0  0  0  0  0  0
    2.1814   -5.2764    0.0000 C   0  0  0  0  0  0  0  0  0  0  0  0
    2.1814   -4.4514    0.0000 S   0  0  0  0  0  0  0  0  0  0  0  0
    5.0392   -4.4514    0.0000 C   0  0  0  0  0  0  0  0  0  0  0  0
    5.7537   -4.0389    0.0000 C   0  0  0  0  0  0  0  0  0  0  0  0
    5.7537   -3.2138    0.0000 C   0  0  0  0  0  0  0  0  0  0  0  0
    5.0392   -2.8013    0.0000 C   0  0  0  0  0  0  0  0  0  0  0  0
    4.3248   -5.6889    0.0000 C   0  0  0  0  0  0  0  0  0  0  0  0
    4.3248   -6.5139    0.0000 C   0  0  0  0  0  0  0  0  0  0  0  0
    5.0393   -6.9264    0.0000 C   0  0  0  0  0  0  0  0  0  0  0  0
    5.7538   -6.5139    0.0000 C   0  0  0  0  0  0  0  0  0  0  0  0
    5.7538   -5.6889    0.0000 C   0  0  0  0  0  0  0  0  0  0  0  0
    5.0393   -5.2764    0.0000 C   0  0  0  0  0  0  0  0  0  0  0  0
    1.4669   -5.6889    0.0000 N   0  0  0  0  0  0  0  0  0  0  0  0
    0.7524   -5.2764    0.0000 C   0  0  0  0  0  0  0  0  0  0  0  0
    0.0379   -5.6889    0.0000 C   0  0  0  0  0  0  0  0  0  0  0  0
    0.7524   -6.9264    0.0000 C   0  0  0  0  0  0  0  0  0  0  0  0
    1.4669   -6.5139    0.0000 C   0  0  0  0  0  0  0  0  0  0  0  0
    3.6103   -1.9763    0.0000 O   0  0  0  0  0  0  0  0  0  0  0  0
    3.5332   -0.8446    0.0000 O   0  0  0  0  0  0  0  0  0  0  0  0
    1.7369   -4.2549    0.0000 O   0  0  0  0  0  0  0  0  0  0  0  0
    1.5135   -3.7835    0.0000 Cl  0  0  0  0  0  0  0  0  0  0  0  0
    3.6780   -1.3750    0.0000 Cl  0  0  0  0  0  0  0  0  0  0  0  0
  1  2  1  0  0  0  0
  1  6  1  0  0  0  0
  1  7  1  0  0  0  0
  3  4  1  0  0  0  0
  3  2  1  0  0  0  0
  4  5  1  0  0  0  0
  4 26  2  0  0  0  0
  5  6  1  0  0  0  0
  6 10  1  0  0  0  0
  6 53  2  0  0  0  0
  6 56  1  0  0  0  0
  7  8  2  0  0  0  0
  7 15  1  0  0  0  0
  8  9  1  0  0  0  0
  9 10  2  0  0  0  0
  9 21  1  0  0  0  0
 11 12  1  0  0  0  0
 11  2  2  0  0  0  0
 12 13  2  0  0  0  0
 13 14  1  0  0  0  0
 14  3  2  0  0  0  0
 15 16  2  0  0  0  0
 15 20  1  0  0  0  0
 16 17  1  0  0  0  0
 17 18  2  0  0  0  0
 18 19  1  0  0  0  0
 19 20  2  0  0  0  0
 21 22  1  0  0  0  0
 21 25  1  0  0  0  0
 22 23  1  0  0  0  0
 24 25  1  0  0  0  0
 27 28  1  0  0  0  0
 27 32  1  0  0  0  0
 27 33  1  0  0  0  0
 29 28  1  0  0  0  0
 29 30  1  0  0  0  0
 30 31  1  0  0  0  0
 30 52  2  0  0  0  0
 31 32  1  0  0  0  0
 32 36  1  0  0  0  0
 32 26  1  0  0  0  0
 32 54  2  0  0  0  0
 32 55  1  0  0  0  0
 33 34  2  0  0  0  0
 33 41  1  0  0  0  0
 34 35  1  0  0  0  0
 35 36  2  0  0  0  0
 35 47  1  0  0  0  0
 37 28  2  0  0  0  0
 37 38  1  0  0  0  0
 38 39  2  0  0  0  0
 39 40  1  0  0  0  0
 40 29  2  0  0  0  0
 41 42  2  0  0  0  0
 41 46  1  0  0  0  0
 42 43  1  0  0  0  0
 43 44  2  0  0  0  0
 44 45  1  0  0  0  0
 45 46  2  0  0  0  0
 47 48  1  0  0  0  0
 47 51  1  0  0  0  0
 48 49  1  0  0  0  0
 50 51  1  0  0  0  0
 52  6  1  0  0  0  0
M  END
68
 

 56 63  0  0  0  0  0  0  0  0999 V2000
    1.7875    0.0197    0.0000 C   0  0  0  0  0  0  0  0  0  0  0  0
    1.0730   -0.3928    0.0000 C   0  0  0  0  0  0  0  0  0  0  0  0
    1.0730   -1.2179    0.0000 C   0  0  0  0  0  0  0  0  0  0  0  0
    1.7875   -1.6304    0.0000 C   0  0  0  0  0  0  0  0  0  0  0  0
    2.5020   -1.2179    0.0000 N   0  0  0  0  0  0  0  0  0  0  0  0
    2.5020   -0.3928    0.0000 C   0  0  0  0  0  0  0  0  0  0  0  0
    1.7875   -2.4554    0.0000 N   0  0  0  0  0  0  0  0  0  0  0  0
    2.5020   -2.8679    0.0000 N   0  0  0  0  0  0  0  0  0  0  0  0
    3.2950   -2.1018    0.0000 Re  0  0  0  0  0  0  0  0  0  0  0  0
    1.7875    0.8447    0.0000 C   0  0  0  0  0  0  0  0  0  0  0  0
    2.5020    1.2572    0.0000 O   0  0  0  0  0  0  0  0  0  0  0  0
    1.0730    1.2572    0.0000 N   0  0  0  0  0  0  0  0  0  0  0  0
    0.3586    0.8447    0.0000 C   0  0  0  0  0  0  0  0  0  0  0  0
   -0.3559    1.2572    0.0000 C   0  0  0  0  0  0  0  0  0  0  0  0
   -1.0704    0.8447    0.0000 C   0  0  0  0  0  0  0  0  0  0  0  0
   -1.7849    1.2572    0.0000 C   0  0  0  0  0  0  0  0  0  0  0  0
    3.3000   -4.1054    0.0000 P   0  0  0  0  0  0  0  0  0  0  0  0
    4.1250   -4.1054    0.0000 C   0  0  0  0  0  0  0  0  0  0  0  0
    4.5375   -4.8198    0.0000 C   0  0  0  0  0  0  0  0  0  0  0  0
    5.3625   -4.8198    0.0000 C   0  0  0  0  0  0  0  0  0  0  0  0
    5.7750   -4.1054    0.0000 C   0  0  0  0  0  0  0  0  0  0  0  0
    5.3625   -3.3909    0.0000 C   0  0  0  0  0  0  0  0  0  0  0  0
    4.5375   -3.3909    0.0000 C   0  0  0  0  0  0  0  0  0  0  0  0
    2.4750   -4.1054    0.0000 C   0  0  0  0  0  0  0  0  0  0  0  0
    3.3000   -4.9304    0.0000 C   0  0  0  0  0  0  0  0  0  0  0  0
    2.5855   -5.3429    0.0000 C   0  0  0  0  0  0  0  0  0  0  0  0
    2.5855   -6.1679    0.0000 C   0  0  0  0  0  0  0  0  0  0  0  0
    3.3000   -6.5804    0.0000 C   0  0  0  0  0  0  0  0  0  0  0  0
    4.0145   -6.1679    0.0000 C   0  0  0  0  0  0  0  0  0  0  0  0
    4.0145   -5.3429    0.0000 C   0  0  0  0  0  0  0  0  0  0  0  0
    2.0625   -3.3909    0.0000 C   0  0  0  0  0  0  0  0  0  0  0  0
    1.2375   -3.3909    0.0000 C   0  0  0  0  0  0  0  0  0  0  0  0
    0.8250   -4.1054    0.0000 C   0  0  0  0  0  0  0  0  0  0  0  0
    1.2375   -4.8198    0.0000 C   0  0  0  0  0  0  0  0  0  0  0  0
    2.0625   -4.8198    0.0000 C   0  0  0  0  0  0  0  0  0  0  0  0
    4.8611   -0.8446    0.0000 P   0  0  0  0  0  0  0  0  0  0  0  0
    4.4486   -0.1302    0.0000 C   0  0  0  0  0  0  0  0  0  0  0  0
    4.8611    0.5843    0.0000 C   0  0  0  0  0  0  0  0  0  0  0  0
    4.4486    1.2988    0.0000 C   0  0  0  0  0  0  0  0  0  0  0  0
    3.6236    1.2988    0.0000 C   0  0  0  0  0  0  0  0  0  0  0  0
    3.2111    0.5843    0.0000 C   0  0  0  0  0  0  0  0  0  0  0  0
    3.6236   -0.1302    0.0000 C   0  0  0  0  0  0  0  0  0  0  0  0
    5.2736   -1.5591    0.0000 C   0  0  0  0  0  0  0  0  0  0  0  0
    5.5756   -0.4321    0.0000 C   0  0  0  0  0  0  0  0  0  0  0  0
    6.2900   -0.8446    0.0000 C   0  0  0  0  0  0  0  0  0  0  0  0
    7.0045   -0.4321    0.0000 C   0  0  0  0  0  0  0  0  0  0  0  0
    7.0045    0.3929    0.0000 C   0  0  0  0  0  0  0  0  0  0  0  0
    6.2901    0.8054    0.0000 C   0  0  0  0  0  0  0  0  0  0  0  0
    5.5756    0.3929    0.0000 C   0  0  0  0  0  0  0  0  0  0  0  0
    4.8611   -2.2736    0.0000 C   0  0  0  0  0  0  0  0  0  0  0  0
    5.2736   -2.9881    0.0000 C   0  0  0  0  0  0  0  0  0  0  0  0
    6.0986   -2.9881    0.0000 C   0  0  0  0  0  0  0  0  0  0  0  0
    6.5111   -2.2736    0.0000 C   0  0  0  0  0  0  0  0  0  0  0  0
    6.0986   -1.5591    0.0000 C   0  0  0  0  0  0  0  0  0  0  0  0
    3.2950   -1.0607    0.0000 Cl  0  0  0  0  0  0  0  0  0  0  0  0
    3.9962   -2.8423    0.0000 Cl  0  0  0  0  0  0  0  0  0  0  0  0
  1  2  2  0  0  0  0
  1  6  1  0  0  0  0
  1 10  1  0  0  0  0
  2  3  1  0  0  0  0
  3  4  2  0  0  0  0
  4  5  1  0  0  0  0
  4  7  1  0  0  0  0
  5  6  2  0  0  0  0
  5  9  1  0  0  0  0
  7  8  2  0  0  0  0
  8  9  1  0  0  0  0
  9 17  1  0  0  0  0
  9 55  1  0  0  0  0
  9 56  1  0  0  0  0
 10 11  2  0  0  0  0
 10 12  1  0  0  0  0
 12 13  1  0  0  0  0
 13 14  1  0  0  0  0
 14 15  1  0  0  0  0
 15 16  1  0  0  0  0
 17 18  1  0  0  0  0
 17 24  1  0  0  0  0
 17 25  1  0  0  0  0
 18 19  2  0  0  0  0
 18 23  1  0  0  0  0
 19 20  1  0  0  0  0
 20 21  2  0  0  0  0
 21 22  1  0  0  0  0
 22 23  2  0  0  0  0
 24 31  2  0  0  0  0
 24 35  1  0  0  0  0
 25 26  2  0  0  0  0
 25 30  1  0  0  0  0
 26 27  1  0  0  0  0
 27 28  2  0  0  0  0
 28 29  1  0  0  0  0
 29 30  2  0  0  0  0
 31 32  1  0  0  0  0
 32 33  2  0  0  0  0
 33 34  1  0  0  0  0
 34 35  2  0  0  0  0
 36 37  1  0  0  0  0
 36 43  1  0  0  0  0
 36 44  1  0  0  0  0
 36  9  1  0  0  0  0
 37 38  2  0  0  0  0
 37 42  1  0  0  0  0
 38 39  1  0  0  0  0
 39 40  2  0  0  0  0
 40 41  1  0  0  0  0
 41 42  2  0  0  0  0
 43 50  2  0  0  0  0
 43 54  1  0  0  0  0
 44 45  2  0  0  0  0
 44 49  1  0  0  0  0
 45 46  1  0  0  0  0
 46 47  2  0  0  0  0
 47 48  1  0  0  0  0
 48 49  2  0  0  0  0
 50 51  1  0  0  0  0
 51 52  2  0  0  0  0
 52 53  1  0  0  0  0
 53 54  2  0  0  0  0
M  END
69
 

 53 62  0  0  0  0  0  0  0  0999 V2000
    4.5179   -1.5125    0.0000 P   0  0  0  0  0  0  0  0  0  0  0  0
    4.5179   -2.3375    0.0000 C   0  0  0  0  0  0  0  0  0  0  0  0
    5.3147   -1.7260    0.0000 C   0  0  0  0  0  0  0  0  0  0  0  0
    3.7210   -1.7260    0.0000 C   0  0  0  0  0  0  0  0  0  0  0  0
    3.8034   -2.7500    0.0000 C   0  0  0  0  0  0  0  0  0  0  0  0
    3.8034   -3.5750    0.0000 C   0  0  0  0  0  0  0  0  0  0  0  0
    4.5179   -3.9875    0.0000 C   0  0  0  0  0  0  0  0  0  0  0  0
    5.2323   -3.5750    0.0000 C   0  0  0  0  0  0  0  0  0  0  0  0
    5.2323   -2.7500    0.0000 C   0  0  0  0  0  0  0  0  0  0  0  0
    5.5283   -2.5229    0.0000 C   0  0  0  0  0  0  0  0  0  0  0  0
    6.3252   -2.7364    0.0000 C   0  0  0  0  0  0  0  0  0  0  0  0
    6.9086   -2.1531    0.0000 C   0  0  0  0  0  0  0  0  0  0  0  0
    6.6950   -1.3562    0.0000 C   0  0  0  0  0  0  0  0  0  0  0  0
    5.8981   -1.1427    0.0000 C   0  0  0  0  0  0  0  0  0  0  0  0
    3.1376   -1.1427    0.0000 C   0  0  0  0  0  0  0  0  0  0  0  0
    2.3407   -1.3562    0.0000 C   0  0  0  0  0  0  0  0  0  0  0  0
    2.1272   -2.1531    0.0000 C   0  0  0  0  0  0  0  0  0  0  0  0
    2.7105   -2.7364    0.0000 C   0  0  0  0  0  0  0  0  0  0  0  0
    3.5074   -2.5229    0.0000 C   0  0  0  0  0  0  0  0  0  0  0  0
    2.7696    3.0839    0.0000 C   0  0  0  0  0  0  0  0  0  0  0  0
    2.0552    2.6714    0.0000 C   0  0  0  0  0  0  0  0  0  0  0  0
    2.0552    1.8464    0.0000 C   0  0  0  0  0  0  0  0  0  0  0  0
    2.7696    1.4339    0.0000 C   0  0  0  0  0  0  0  0  0  0  0  0
    3.4841    1.8464    0.0000 N   0  0  0  0  0  0  0  0  0  0  0  0
    3.4841    2.6714    0.0000 C   0  0  0  0  0  0  0  0  0  0  0  0
    2.7696    0.6089    0.0000 C   0  0  0  0  0  0  0  0  0  0  0  0
    2.0552    0.1964    0.0000 C   0  0  0  0  0  0  0  0  0  0  0  0
    2.0552   -0.6286    0.0000 C   0  0  0  0  0  0  0  0  0  0  0  0
    2.7696   -1.0411    0.0000 C   0  0  0  0  0  0  0  0  0  0  0  0
    3.4841   -0.6286    0.0000 C   0  0  0  0  0  0  0  0  0  0  0  0
    3.4841    0.1964    0.0000 N   0  0  0  0  0  0  0  0  0  0  0  0
    4.5325    1.0214    0.0000 Ru  0  0  0  0  0  0  0  0  0  0  0  0
    5.5809    1.8464    0.0000 N   0  0  0  0  0  0  0  0  0  0  0  0
    6.2954    1.4339    0.0000 C   0  0  0  0  0  0  0  0  0  0  0  0
    7.0099    1.8464    0.0000 C   0  0  0  0  0  0  0  0  0  0  0  0
    7.0099    2.6714    0.0000 C   0  0  0  0  0  0  0  0  0  0  0  0
    6.2954    3.0839    0.0000 C   0  0  0  0  0  0  0  0  0  0  0  0
    5.5809    2.6714    0.0000 C   0  0  0  0  0  0  0  0  0  0  0  0
    6.2954    0.6089    0.0000 C   0  0  0  0  0  0  0  0  0  0  0  0
    5.5809    0.1964    0.0000 N   0  0  0  0  0  0  0  0  0  0  0  0
    5.5809   -0.6286    0.0000 C   0  0  0  0  0  0  0  0  0  0  0  0
    6.2954   -1.0411    0.0000 C   0  0  0  0  0  0  0  0  0  0  0  0
    7.0099   -0.6286    0.0000 C   0  0  0  0  0  0  0  0  0  0  0  0
    7.0099    0.1964    0.0000 C   0  0  0  0  0  0  0  0  0  0  0  0
    4.5375    5.0482    0.0000 C   0  0  0  0  0  0  0  0  0  0  0  0
    3.8230    4.6357    0.0000 C   0  0  0  0  0  0  0  0  0  0  0  0
    3.8230    3.8107    0.0000 C   0  0  0  0  0  0  0  0  0  0  0  0
    4.5375    3.3982    0.0000 C   0  0  0  0  0  0  0  0  0  0  0  0
    5.2520    3.8107    0.0000 C   0  0  0  0  0  0  0  0  0  0  0  0
    5.2520    4.6357    0.0000 C   0  0  0  0  0  0  0  0  0  0  0  0
    4.5375    2.5732    0.0000 N   0  0  0  0  0  0  0  0  0  0  0  0
    5.1734    2.0428    0.0000 C   0  0  0  0  0  0  0  0  0  0  0  0
    3.9016    2.0821    0.0000 C   0  0  0  0  0  0  0  0  0  0  0  0
  1  2  1  0  0  0  0
  1  3  1  0  0  0  0
  1  4  1  0  0  0  0
  2  5  2  0  0  0  0
  2  9  1  0  0  0  0
  3 10  2  0  0  0  0
  3 14  1  0  0  0  0
  4 15  2  0  0  0  0
  4 19  1  0  0  0  0
  5  6  1  0  0  0  0
  6  7  2  0  0  0  0
  7  8  1  0  0  0  0
  8  9  2  0  0  0  0
 10 11  1  0  0  0  0
 11 12  2  0  0  0  0
 12 13  1  0  0  0  0
 13 14  2  0  0  0  0
 15 16  1  0  0  0  0
 16 17  2  0  0  0  0
 17 18  1  0  0  0  0
 18 19  2  0  0  0  0
 20 21  2  0  0  0  0
 20 25  1  0  0  0  0
 21 22  1  0  0  0  0
 22 23  2  0  0  0  0
 23 24  1  0  0  0  0
 23 26  1  0  0  0  0
 24 25  2  0  0  0  0
 24 32  1  0  0  0  0
 26 27  2  0  0  0  0
 26 31  1  0  0  0  0
 27 28  1  0  0  0  0
 28 29  2  0  0  0  0
 29 30  1  0  0  0  0
 30 31  2  0  0  0  0
 31 32  1  0  0  0  0
 32 33  1  0  0  0  0
 32  1  1  0  0  0  0
 32 40  1  0  0  0  0
 33 34  2  0  0  0  0
 33 38  1  0  0  0  0
 34 35  1  0  0  0  0
 34 39  1  0  0  0  0
 35 36  2  0  0  0  0
 36 37  1  0  0  0  0
 37 38  2  0  0  0  0
 39 40  2  0  0  0  0
 39 44  1  0  0  0  0
 40 41  1  0  0  0  0
 41 42  2  0  0  0  0
 42 43  1  0  0  0  0
 43 44  2  0  0  0  0
 45 46  2  0  0  0  0
 45 50  1  0  0  0  0
 46 47  1  0  0  0  0
 47 48  2  0  0  0  0
 48 49  1  0  0  0  0
 48 51  1  0  0  0  0
 49 50  2  0  0  0  0
 51 52  1  0  0  0  0
 51 53  1  0  0  0  0
 51 32  1  0  0  0  0
M  END
70
 

 61 72  0  0  0  0  0  0  0  0999 V2000
   -1.8271    8.2712    0.0000 C   0  0  0  0  0  0  0  0  0  0  0  0
   -2.6521    8.2712    0.0000 C   0  0  0  0  0  0  0  0  0  0  0  0
   -3.0647    7.5567    0.0000 C   0  0  0  0  0  0  0  0  0  0  0  0
   -2.6522    6.8423    0.0000 C   0  0  0  0  0  0  0  0  0  0  0  0
   -1.8271    6.8423    0.0000 N   0  0  0  0  0  0  0  0  0  0  0  0
   -1.4146    7.5568    0.0000 C   0  0  0  0  0  0  0  0  0  0  0  0
   -0.5896    7.5568    0.0000 C   0  0  0  0  0  0  0  0  0  0  0  0
   -0.1771    8.2713    0.0000 C   0  0  0  0  0  0  0  0  0  0  0  0
   -0.5896    8.9857    0.0000 C   0  0  0  0  0  0  0  0  0  0  0  0
   -1.4146    8.9857    0.0000 C   0  0  0  0  0  0  0  0  0  0  0  0
   -0.1771    6.8423    0.0000 N   0  0  0  0  0  0  0  0  0  0  0  0
    0.6479    6.8423    0.0000 C   0  0  0  0  0  0  0  0  0  0  0  0
    1.0604    7.5567    0.0000 C   0  0  0  0  0  0  0  0  0  0  0  0
    0.6478    8.2712    0.0000 C   0  0  0  0  0  0  0  0  0  0  0  0
   -1.8032    4.2266    0.0000 N   0  0  0  0  0  0  0  0  0  0  0  0
   -2.6282    4.2266    0.0000 C   0  0  0  0  0  0  0  0  0  0  0  0
   -3.0407    3.5121    0.0000 C   0  0  0  0  0  0  0  0  0  0  0  0
   -2.6282    2.7977    0.0000 C   0  0  0  0  0  0  0  0  0  0  0  0
   -1.8032    2.7977    0.0000 C   0  0  0  0  0  0  0  0  0  0  0  0
   -1.3907    3.5122    0.0000 C   0  0  0  0  0  0  0  0  0  0  0  0
   -1.3907    2.0832    0.0000 C   0  0  0  0  0  0  0  0  0  0  0  0
   -0.5657    2.0832    0.0000 C   0  0  0  0  0  0  0  0  0  0  0  0
   -0.1532    2.7976    0.0000 C   0  0  0  0  0  0  0  0  0  0  0  0
   -0.5657    3.5121    0.0000 C   0  0  0  0  0  0  0  0  0  0  0  0
    0.6718    2.7976    0.0000 C   0  0  0  0  0  0  0  0  0  0  0  0
    1.0843    3.5121    0.0000 C   0  0  0  0  0  0  0  0  0  0  0  0
    0.6718    4.2265    0.0000 C   0  0  0  0  0  0  0  0  0  0  0  0
   -0.1532    4.2266    0.0000 N   0  0  0  0  0  0  0  0  0  0  0  0
   -0.9609    5.5754    0.0000 Cu  0  0  0  0  0  0  0  0  0  0  0  0
    1.3863    4.6390    0.0000 C   0  0  0  0  0  0  0  0  0  0  0  0
    1.7988    3.9246    0.0000 C   0  0  0  0  0  0  0  0  0  0  0  0
   -3.7552    3.9246    0.0000 C   0  0  0  0  0  0  0  0  0  0  0  0
   -3.3427    4.6391    0.0000 C   0  0  0  0  0  0  0  0  0  0  0  0
   -3.7791    7.1442    0.0000 C   0  0  0  0  0  0  0  0  0  0  0  0
   -3.3666    6.4298    0.0000 C   0  0  0  0  0  0  0  0  0  0  0  0
    1.3623    6.4298    0.0000 C   0  0  0  0  0  0  0  0  0  0  0  0
    1.7748    7.1442    0.0000 C   0  0  0  0  0  0  0  0  0  0  0  0
   -3.7791    5.7153    0.0000 C   0  0  0  0  0  0  0  0  0  0  0  0
   -4.6041    5.7153    0.0000 C   0  0  0  0  0  0  0  0  0  0  0  0
   -5.0166    6.4297    0.0000 C   0  0  0  0  0  0  0  0  0  0  0  0
   -4.6041    7.1442    0.0000 C   0  0  0  0  0  0  0  0  0  0  0  0
   -4.5802    3.9246    0.0000 C   0  0  0  0  0  0  0  0  0  0  0  0
   -4.9927    4.6391    0.0000 C   0  0  0  0  0  0  0  0  0  0  0  0
   -4.5802    5.3536    0.0000 C   0  0  0  0  0  0  0  0  0  0  0  0
   -3.7552    5.3536    0.0000 C   0  0  0  0  0  0  0  0  0  0  0  0
    1.7748    5.7153    0.0000 C   0  0  0  0  0  0  0  0  0  0  0  0
    2.5998    5.7153    0.0000 C   0  0  0  0  0  0  0  0  0  0  0  0
    3.0123    6.4297    0.0000 C   0  0  0  0  0  0  0  0  0  0  0  0
    2.5998    7.1442    0.0000 C   0  0  0  0  0  0  0  0  0  0  0  0
    2.6238    3.9245    0.0000 C   0  0  0  0  0  0  0  0  0  0  0  0
    3.0363    4.6390    0.0000 C   0  0  0  0  0  0  0  0  0  0  0  0
    2.6239    5.3535    0.0000 C   0  0  0  0  0  0  0  0  0  0  0  0
    1.7988    5.3535    0.0000 C   0  0  0  0  0  0  0  0  0  0  0  0
   -5.8416    6.4297    0.0000 O   0  0  0  0  0  0  0  0  0  0  0  0
   -5.8177    4.6391    0.0000 O   0  0  0  0  0  0  0  0  0  0  0  0
    3.8373    6.4297    0.0000 O   0  0  0  0  0  0  0  0  0  0  0  0
    3.8613    4.6390    0.0000 O   0  0  0  0  0  0  0  0  0  0  0  0
    4.2498    7.1442    0.0000 C   0  0  0  0  0  0  0  0  0  0  0  0
    4.2738    3.9245    0.0000 C   0  0  0  0  0  0  0  0  0  0  0  0
   -6.2541    7.1442    0.0000 C   0  0  0  0  0  0  0  0  0  0  0  0
   -6.2302    3.9246    0.0000 C   0  0  0  0  0  0  0  0  0  0  0  0
  1  2  2  0  0  0  0
  1  6  1  0  0  0  0
  1 10  1  0  0  0  0
  2  3  1  0  0  0  0
  3  4  2  0  0  0  0
  4  5  1  0  0  0  0
  5  6  2  0  0  0  0
  5 29  1  0  0  0  0
  6  7  1  0  0  0  0
  7  8  2  0  0  0  0
  7 11  1  0  0  0  0
  8  9  1  0  0  0  0
  8 14  1  0  0  0  0
  9 10  2  0  0  0  0
 11 12  2  0  0  0  0
 12 13  1  0  0  0  0
 12 36  1  0  0  0  0
 13 14  2  0  0  0  0
 15 16  2  0  0  0  0
 15 20  1  0  0  0  0
 16 17  1  0  0  0  0
 17 18  2  0  0  0  0
 18 19  1  0  0  0  0
 19 20  2  0  0  0  0
 19 21  1  0  0  0  0
 20 24  1  0  0  0  0
 21 22  2  0  0  0  0
 22 23  1  0  0  0  0
 23 25  2  0  0  0  0
 24 28  2  0  0  0  0
 24 23  1  0  0  0  0
 25 26  1  0  0  0  0
 26 27  2  0  0  0  0
 27 28  1  0  0  0  0
 27 30  1  0  0  0  0
 29 11  1  0  0  0  0
 29 15  1  0  0  0  0
 29 28  1  0  0  0  0
 30 53  2  0  0  0  0
 30 31  1  0  0  0  0
 31 50  2  0  0  0  0
 32 42  2  0  0  0  0
 33 16  1  0  0  0  0
 33 45  2  0  0  0  0
 33 32  1  0  0  0  0
 34 41  2  0  0  0  0
 34 35  1  0  0  0  0
 35  4  1  0  0  0  0
 35 38  2  0  0  0  0
 36 46  2  0  0  0  0
 37 49  2  0  0  0  0
 37 36  1  0  0  0  0
 38 39  1  0  0  0  0
 39 40  2  0  0  0  0
 40 41  1  0  0  0  0
 40 54  1  0  0  0  0
 42 43  1  0  0  0  0
 43 44  2  0  0  0  0
 43 55  1  0  0  0  0
 44 45  1  0  0  0  0
 46 47  1  0  0  0  0
 47 48  2  0  0  0  0
 48 49  1  0  0  0  0
 48 56  1  0  0  0  0
 50 51  1  0  0  0  0
 51 52  2  0  0  0  0
 51 57  1  0  0  0  0
 52 53  1  0  0  0  0
 54 60  1  0  0  0  0
 55 61  1  0  0  0  0
 56 58  1  0  0  0  0
 57 59  1  0  0  0  0
M  END
71
 

116141  0  0  0  0  0  0  0  0999 V2000
    8.5147  -13.8848    0.0000 C   0  0  0  0  0  0  0  0  0  0  0  0
    9.3013  -13.8779    0.0000 C   0  0  0  0  0  0  0  0  0  0  0  0
    9.5425  -13.0477    0.0000 C   0  0  0  0  0  0  0  0  0  0  0  0
    8.9175  -12.5976    0.0000 N   0  0  0  0  0  0  0  0  0  0  0  0
    8.2385  -13.0797    0.0000 C   0  0  0  0  0  0  0  0  0  0  0  0
    6.4397  -10.9836    0.0000 C   0  0  0  0  0  0  0  0  0  0  0  0
    6.4469  -11.8118    0.0000 C   0  0  0  0  0  0  0  0  0  0  0  0
    7.1944  -12.0536    0.0000 C   0  0  0  0  0  0  0  0  0  0  0  0
    7.6441  -11.3873    0.0000 N   0  0  0  0  0  0  0  0  0  0  0  0
    7.2033  -10.7079    0.0000 C   0  0  0  0  0  0  0  0  0  0  0  0
    7.4705  -12.8587    0.0000 C   0  0  0  0  0  0  0  0  0  0  0  0
    9.2576   -8.8680    0.0000 C   0  0  0  0  0  0  0  0  0  0  0  0
    8.4710   -8.8749    0.0000 C   0  0  0  0  0  0  0  0  0  0  0  0
    8.2088   -9.6846    0.0000 C   0  0  0  0  0  0  0  0  0  0  0  0
    8.8962  -10.1548    0.0000 N   0  0  0  0  0  0  0  0  0  0  0  0
    9.5133   -9.6940    0.0000 C   0  0  0  0  0  0  0  0  0  0  0  0
    7.4449   -9.9191    0.0000 C   0  0  0  0  0  0  0  0  0  0  0  0
   11.3946  -11.7479    0.0000 C   0  0  0  0  0  0  0  0  0  0  0  0
   11.3876  -10.9612    0.0000 C   0  0  0  0  0  0  0  0  0  0  0  0
   10.5571  -10.6786    0.0000 C   0  0  0  0  0  0  0  0  0  0  0  0
   10.1078  -11.3864    0.0000 N   0  0  0  0  0  0  0  0  0  0  0  0
   10.5690  -12.0449    0.0000 C   0  0  0  0  0  0  0  0  0  0  0  0
   10.3479  -12.8129    0.0000 C   0  0  0  0  0  0  0  0  0  0  0  0
   10.3226   -9.9146    0.0000 C   0  0  0  0  0  0  0  0  0  0  0  0
    8.8413  -11.2930    0.0000 Zn  0  0  0  0  0  0  0  0  0  0  0  0
    6.9020  -13.4566    0.0000 C   0  0  0  0  0  0  0  0  0  0  0  0
    6.1000  -13.2632    0.0000 C   0  0  0  0  0  0  0  0  0  0  0  0
    5.5315  -13.8611    0.0000 C   0  0  0  0  0  0  0  0  0  0  0  0
    5.7650  -14.6523    0.0000 C   0  0  0  0  0  0  0  0  0  0  0  0
    6.5670  -14.8457    0.0000 C   0  0  0  0  0  0  0  0  0  0  0  0
    7.1355  -14.2479    0.0000 C   0  0  0  0  0  0  0  0  0  0  0  0
    6.8614   -9.3359    0.0000 C   0  0  0  0  0  0  0  0  0  0  0  0
    7.0747   -8.5389    0.0000 C   0  0  0  0  0  0  0  0  0  0  0  0
    6.4911   -7.9557    0.0000 C   0  0  0  0  0  0  0  0  0  0  0  0
    5.6943   -8.1695    0.0000 C   0  0  0  0  0  0  0  0  0  0  0  0
    5.4810   -8.9664    0.0000 C   0  0  0  0  0  0  0  0  0  0  0  0
    6.0645   -9.5496    0.0000 C   0  0  0  0  0  0  0  0  0  0  0  0
   10.8967   -9.3221    0.0000 C   0  0  0  0  0  0  0  0  0  0  0  0
   11.6968   -9.5230    0.0000 C   0  0  0  0  0  0  0  0  0  0  0  0
   12.2709   -8.9305    0.0000 C   0  0  0  0  0  0  0  0  0  0  0  0
   12.0449   -8.1371    0.0000 C   0  0  0  0  0  0  0  0  0  0  0  0
   11.2447   -7.9362    0.0000 C   0  0  0  0  0  0  0  0  0  0  0  0
   10.6706   -8.5287    0.0000 C   0  0  0  0  0  0  0  0  0  0  0  0
   10.9322  -13.3953    0.0000 C   0  0  0  0  0  0  0  0  0  0  0  0
   10.7200  -14.1926    0.0000 C   0  0  0  0  0  0  0  0  0  0  0  0
   11.3044  -14.7750    0.0000 C   0  0  0  0  0  0  0  0  0  0  0  0
   12.1009  -14.5602    0.0000 C   0  0  0  0  0  0  0  0  0  0  0  0
   12.3131  -13.7629    0.0000 C   0  0  0  0  0  0  0  0  0  0  0  0
   11.7288  -13.1805    0.0000 C   0  0  0  0  0  0  0  0  0  0  0  0
   19.4201   -8.7838    0.0000 C   0  0  0  0  0  0  0  0  0  0  0  0
   18.6334   -8.7907    0.0000 C   0  0  0  0  0  0  0  0  0  0  0  0
   18.3922   -9.6209    0.0000 C   0  0  0  0  0  0  0  0  0  0  0  0
   19.0172  -10.0710    0.0000 N   0  0  0  0  0  0  0  0  0  0  0  0
   19.6962   -9.5888    0.0000 C   0  0  0  0  0  0  0  0  0  0  0  0
   21.4950  -11.6849    0.0000 C   0  0  0  0  0  0  0  0  0  0  0  0
   21.4878  -10.8568    0.0000 C   0  0  0  0  0  0  0  0  0  0  0  0
   20.7404  -10.6149    0.0000 C   0  0  0  0  0  0  0  0  0  0  0  0
   20.2907  -11.2813    0.0000 N   0  0  0  0  0  0  0  0  0  0  0  0
   20.7315  -11.9607    0.0000 C   0  0  0  0  0  0  0  0  0  0  0  0
   20.4642   -9.8098    0.0000 C   0  0  0  0  0  0  0  0  0  0  0  0
   18.6771  -13.8005    0.0000 C   0  0  0  0  0  0  0  0  0  0  0  0
   19.4638  -13.7937    0.0000 C   0  0  0  0  0  0  0  0  0  0  0  0
   19.7259  -12.9839    0.0000 C   0  0  0  0  0  0  0  0  0  0  0  0
   19.0385  -12.5138    0.0000 N   0  0  0  0  0  0  0  0  0  0  0  0
   18.4214  -12.9746    0.0000 C   0  0  0  0  0  0  0  0  0  0  0  0
   20.4898  -12.7495    0.0000 C   0  0  0  0  0  0  0  0  0  0  0  0
   16.5402  -10.9207    0.0000 C   0  0  0  0  0  0  0  0  0  0  0  0
   16.5471  -11.7074    0.0000 C   0  0  0  0  0  0  0  0  0  0  0  0
   17.3777  -11.9900    0.0000 C   0  0  0  0  0  0  0  0  0  0  0  0
   17.8270  -11.2822    0.0000 N   0  0  0  0  0  0  0  0  0  0  0  0
   17.3657  -10.6236    0.0000 C   0  0  0  0  0  0  0  0  0  0  0  0
   17.5868   -9.8556    0.0000 C   0  0  0  0  0  0  0  0  0  0  0  0
   17.6121  -12.7539    0.0000 C   0  0  0  0  0  0  0  0  0  0  0  0
   19.0934  -11.3755    0.0000 Zn  0  0  0  0  0  0  0  0  0  0  0  0
   21.0327   -9.2120    0.0000 C   0  0  0  0  0  0  0  0  0  0  0  0
   21.8347   -9.4054    0.0000 C   0  0  0  0  0  0  0  0  0  0  0  0
   22.4032   -8.8075    0.0000 C   0  0  0  0  0  0  0  0  0  0  0  0
   22.1697   -8.0162    0.0000 C   0  0  0  0  0  0  0  0  0  0  0  0
   21.3677   -7.8228    0.0000 C   0  0  0  0  0  0  0  0  0  0  0  0
   20.7992   -8.4207    0.0000 C   0  0  0  0  0  0  0  0  0  0  0  0
   21.0734  -13.3327    0.0000 C   0  0  0  0  0  0  0  0  0  0  0  0
   20.8601  -14.1296    0.0000 C   0  0  0  0  0  0  0  0  0  0  0  0
   21.4436  -14.7128    0.0000 C   0  0  0  0  0  0  0  0  0  0  0  0
   22.2404  -14.4991    0.0000 C   0  0  0  0  0  0  0  0  0  0  0  0
   22.4537  -13.7022    0.0000 C   0  0  0  0  0  0  0  0  0  0  0  0
   21.8702  -13.1189    0.0000 C   0  0  0  0  0  0  0  0  0  0  0  0
   17.0381  -13.3464    0.0000 C   0  0  0  0  0  0  0  0  0  0  0  0
   16.2379  -13.1455    0.0000 C   0  0  0  0  0  0  0  0  0  0  0  0
   15.6638  -13.7380    0.0000 C   0  0  0  0  0  0  0  0  0  0  0  0
   15.8899  -14.5315    0.0000 C   0  0  0  0  0  0  0  0  0  0  0  0
   16.6900  -14.7324    0.0000 C   0  0  0  0  0  0  0  0  0  0  0  0
   17.2641  -14.1398    0.0000 C   0  0  0  0  0  0  0  0  0  0  0  0
   17.0025   -9.2732    0.0000 C   0  0  0  0  0  0  0  0  0  0  0  0
   17.2147   -8.4760    0.0000 C   0  0  0  0  0  0  0  0  0  0  0  0
   16.6304   -7.8936    0.0000 C   0  0  0  0  0  0  0  0  0  0  0  0
   15.8338   -8.1084    0.0000 C   0  0  0  0  0  0  0  0  0  0  0  0
   15.6216   -8.9057    0.0000 C   0  0  0  0  0  0  0  0  0  0  0  0
   16.2060   -9.4881    0.0000 C   0  0  0  0  0  0  0  0  0  0  0  0
   13.5929   -4.4786    0.0000 C   0  0  0  0  0  0  0  0  0  0  0  0
   14.4179   -4.4786    0.0000 C   0  0  0  0  0  0  0  0  0  0  0  0
   13.1804   -5.1930    0.0000 C   0  0  0  0  0  0  0  0  0  0  0  0
   14.8304   -5.1930    0.0000 C   0  0  0  0  0  0  0  0  0  0  0  0
   15.6554   -5.1930    0.0000 C   0  0  0  0  0  0  0  0  0  0  0  0
   12.3554   -5.1930    0.0000 C   0  0  0  0  0  0  0  0  0  0  0  0
   16.0679   -5.9075    0.0000 C   0  0  3  0  0  0  0  0  0  0  0  0
   11.9429   -5.9075    0.0000 C   0  0  3  0  0  0  0  0  0  0  0  0
   11.1179   -5.9075    0.0000 C   0  0  0  0  0  0  0  0  0  0  0  0
   10.7053   -6.6220    0.0000 C   0  0  0  0  0  0  0  0  0  0  0  0
   11.1178   -7.3365    0.0000 N   0  0  3  0  0  0  0  0  0  0  0  0
   11.9428   -7.3365    0.0000 C   0  0  0  0  0  0  0  0  0  0  0  0
   12.3553   -6.6220    0.0000 C   0  0  0  0  0  0  0  0  0  0  0  0
   15.6554   -6.6220    0.0000 C   0  0  0  0  0  0  0  0  0  0  0  0
   16.0679   -7.3365    0.0000 C   0  0  0  0  0  0  0  0  0  0  0  0
   16.8929   -7.3365    0.0000 N   0  0  3  0  0  0  0  0  0  0  0  0
   17.3054   -6.6220    0.0000 C   0  0  0  0  0  0  0  0  0  0  0  0
   16.8929   -5.9075    0.0000 C   0  0  0  0  0  0  0  0  0  0  0  0
  1  2  2  0  0  0  0
  1  5  1  0  0  0  0
  2  3  1  0  0  0  0
  3  4  2  0  0  0  0
  3 23  1  0  0  0  0
  4  5  1  0  0  0  0
  5 11  2  0  0  0  0
  6  7  1  0  0  0  0
  6 10  2  0  0  0  0
  7  8  2  0  0  0  0
  8  9  1  0  0  0  0
  8 11  1  0  0  0  0
  9 10  1  0  0  0  0
  9 25  1  0  0  0  0
 10 17  1  0  0  0  0
 11 26  1  0  0  0  0
 12 13  2  0  0  0  0
 12 16  1  0  0  0  0
 13 14  1  0  0  0  0
 14 15  1  0  0  0  0
 14 17  2  0  0  0  0
 15 16  2  0  0  0  0
 16 24  1  0  0  0  0
 17 32  1  0  0  0  0
 18 19  2  0  0  0  0
 18 22  1  0  0  0  0
 19 20  1  0  0  0  0
 20 21  1  0  0  0  0
 20 24  2  0  0  0  0
 21 22  1  0  0  0  0
 22 23  2  0  0  0  0
 23 44  1  0  0  0  0
 24 38  1  0  0  0  0
 25 15  1  0  0  0  0
 25 21  1  0  0  0  0
 25  4  1  0  0  0  0
 25109  1  0  0  0  0
 26 27  2  0  0  0  0
 26 31  1  0  0  0  0
 27 28  1  0  0  0  0
 28 29  2  0  0  0  0
 29 30  1  0  0  0  0
 30 31  2  0  0  0  0
 32 33  2  0  0  0  0
 32 37  1  0  0  0  0
 33 34  1  0  0  0  0
 34 35  2  0  0  0  0
 35 36  1  0  0  0  0
 36 37  2  0  0  0  0
 38 39  2  0  0  0  0
 38 43  1  0  0  0  0
 39 40  1  0  0  0  0
 40 41  2  0  0  0  0
 41 42  1  0  0  0  0
 42 43  2  0  0  0  0
 44 45  2  0  0  0  0
 44 49  1  0  0  0  0
 45 46  1  0  0  0  0
 46 47  2  0  0  0  0
 47 48  1  0  0  0  0
 48 49  2  0  0  0  0
 50 51  2  0  0  0  0
 50 54  1  0  0  0  0
 51 52  1  0  0  0  0
 52 53  2  0  0  0  0
 52 72  1  0  0  0  0
 53 54  1  0  0  0  0
 54 60  2  0  0  0  0
 55 56  1  0  0  0  0
 55 59  2  0  0  0  0
 56 57  2  0  0  0  0
 57 58  1  0  0  0  0
 57 60  1  0  0  0  0
 58 59  1  0  0  0  0
 58 74  1  0  0  0  0
 59 66  1  0  0  0  0
 60 75  1  0  0  0  0
 61 62  2  0  0  0  0
 61 65  1  0  0  0  0
 62 63  1  0  0  0  0
 63 64  1  0  0  0  0
 63 66  2  0  0  0  0
 64 65  2  0  0  0  0
 65 73  1  0  0  0  0
 66 81  1  0  0  0  0
 67 68  2  0  0  0  0
 67 71  1  0  0  0  0
 68 69  1  0  0  0  0
 69 70  1  0  0  0  0
 69 73  2  0  0  0  0
 70 71  1  0  0  0  0
 71 72  2  0  0  0  0
 72 93  1  0  0  0  0
 73 87  1  0  0  0  0
 74 64  1  0  0  0  0
 74 70  1  0  0  0  0
 74 53  1  0  0  0  0
 75 76  2  0  0  0  0
 75 80  1  0  0  0  0
 76 77  1  0  0  0  0
 77 78  2  0  0  0  0
 78 79  1  0  0  0  0
 79 80  2  0  0  0  0
 81 82  2  0  0  0  0
 81 86  1  0  0  0  0
 82 83  1  0  0  0  0
 83 84  2  0  0  0  0
 84 85  1  0  0  0  0
 85 86  2  0  0  0  0
 87 88  2  0  0  0  0
 87 92  1  0  0  0  0
 88 89  1  0  0  0  0
 89 90  2  0  0  0  0
 90 91  1  0  0  0  0
 91 92  2  0  0  0  0
 93 94  2  0  0  0  0
 93 98  1  0  0  0  0
 94 95  1  0  0  0  0
 95 96  2  0  0  0  0
 96 97  1  0  0  0  0
 97 98  2  0  0  0  0
 99100  1  0  0  0  0
 99101  1  0  0  0  0
100102  1  0  0  0  0
101104  2  0  0  0  0
102103  2  0  0  0  0
103105  1  0  0  0  0
104106  1  0  0  0  0
105112  1  0  0  0  0
105116  1  0  0  0  0
106107  1  0  0  0  0
106111  1  0  0  0  0
107108  1  0  0  0  0
108109  1  0  0  0  0
109110  1  0  0  0  0
110111  1  0  0  0  0
112113  1  0  0  0  0
113114  1  0  0  0  0
114115  1  0  0  0  0
114 74  1  0  0  0  0
115116  1  0  0  0  0
M  END
72
 

 69 75  0  0  0  0  0  0  0  0999 V2000
    6.5630   -0.8731    0.0000 C   0  0  3  0  0  0  0  0  0  0  0  0
    5.9170   -1.4610    0.0000 C   0  0  0  0  0  0  0  0  0  0  0  0
    5.1217   -1.1944    0.0000 C   0  0  0  0  0  0  0  0  0  0  0  0
    2.3031   -0.2826    0.0000 Fe  0  0  0  0  0  0  0  0  0  0  0  0
    2.6372    1.5885    0.0000 N   0  0  0  0  0  0  0  0  0  0  0  0
    4.2717    3.1764    0.0000 C   0  0  0  0  0  0  0  0  0  0  0  0
    5.1593    3.1851    0.0000 C   0  0  3  0  0  0  0  0  0  0  0  0
    5.5469    3.9053    0.0000 N   0  0  0  0  0  0  0  0  0  0  0  0
    5.4512    2.4367    0.0000 C   0  0  0  0  0  0  0  0  0  0  0  0
    4.7792    1.8699    0.0000 O   0  0  0  0  0  0  0  0  0  0  0  0
    6.1935    2.0576    0.0000 N   0  0  0  0  0  0  0  0  0  0  0  0
    6.1715    1.2372    0.0000 C   0  0  3  0  0  0  0  0  0  0  0  0
    5.4640    0.9879    0.0000 C   0  0  0  0  0  0  0  0  0  0  0  0
    6.7594    0.6244    0.0000 C   0  0  0  0  0  0  0  0  0  0  0  0
    7.5395    0.7366    0.0000 O   0  0  0  0  0  0  0  0  0  0  0  0
    6.3633   -0.1191    0.0000 N   0  0  0  0  0  0  0  0  0  0  0  0
   12.2214    4.9872    0.0000 C   0  0  0  0  0  0  0  0  0  0  0  0
   11.5070    4.5747    0.0000 C   0  0  0  0  0  0  0  0  0  0  0  0
   11.5070    3.7497    0.0000 C   0  0  0  0  0  0  0  0  0  0  0  0
   12.2214    3.3372    0.0000 N   0  0  0  0  0  0  0  0  0  0  0  0
   12.9359    3.7497    0.0000 C   0  0  0  0  0  0  0  0  0  0  0  0
   12.9359    4.5747    0.0000 N   0  0  0  0  0  0  0  0  0  0  0  0
   12.2214    5.8122    0.0000 N   0  0  0  0  0  0  0  0  0  0  0  0
   12.9359    6.2247    0.0000 C   0  0  0  0  0  0  0  0  0  0  0  0
   12.9359    7.0497    0.0000 N   0  0  0  0  0  0  0  0  0  0  0  0
   13.6504    5.8122    0.0000 O   0  0  0  0  0  0  0  0  0  0  0  0
   13.6504    4.9872    0.0000 C   0  0  0  0  0  0  0  0  0  0  0  0
   13.6504    3.3372    0.0000 O   0  0  0  0  0  0  0  0  0  0  0  0
   12.2214    2.5122    0.0000 C   0  0  3  0  0  0  0  0  0  0  0  0
   11.5540    2.0272    0.0000 S   0  0  0  0  0  0  0  0  0  0  0  0
   11.8089    1.2427    0.0000 C   0  0  3  0  0  0  0  0  0  0  0  0
   12.6339    1.2427    0.0000 C   0  0  3  0  0  0  0  0  0  0  0  0
   12.8889    2.0272    0.0000 C   0  0  3  0  0  0  0  0  0  0  0  0
   13.6735    2.2822    0.0000 O   0  0  0  0  0  0  0  0  0  0  0  0
   13.1189    0.5752    0.0000 O   0  0  0  0  0  0  0  0  0  0  0  0
   11.3240    0.5752    0.0000 C   0  0  3  0  0  0  0  0  0  0  0  0
   11.6596   -0.1784    0.0000 O   0  0  0  0  0  0  0  0  0  0  0  0
   10.5035    0.6615    0.0000 C   0  0  3  0  0  0  0  0  0  0  0  0
   10.0186   -0.0060    0.0000 N   0  0  0  0  0  0  0  0  0  0  0  0
   10.1680    1.4151    0.0000 C   0  0  0  0  0  0  0  0  0  0  0  0
    9.3475    1.5014    0.0000 O   0  0  0  0  0  0  0  0  0  0  0  0
   10.6529    2.0826    0.0000 O   0  0  0  0  0  0  0  0  0  0  0  0
    9.1981    0.0803    0.0000 C   0  0  0  0  0  0  0  0  0  0  0  0
    8.7132   -0.5872    0.0000 C   0  0  3  0  0  0  0  0  0  0  0  0
    7.8927   -0.5009    0.0000 N   0  0  0  0  0  0  0  0  0  0  0  0
    7.4078   -1.1684    0.0000 C   0  0  0  0  0  0  0  0  0  0  0  0
    8.8626    0.8339    0.0000 O   0  0  0  0  0  0  0  0  0  0  0  0
    9.0488   -1.3409    0.0000 C   0  0  0  0  0  0  0  0  0  0  0  0
    9.8692   -1.4271    0.0000 O   0  0  0  0  0  0  0  0  0  0  0  0
    7.7434   -1.9221    0.0000 O   0  0  0  0  0  0  0  0  0  0  0  0
    3.8662    2.4579    0.0000 C   0  0  0  0  0  0  0  0  0  0  0  0
    3.0413    2.4499    0.0000 C   0  0  0  0  0  0  0  0  0  0  0  0
    1.8122    1.5885    0.0000 C   0  0  0  0  0  0  0  0  0  0  0  0
    1.3997    2.3030    0.0000 C   0  0  0  0  0  0  0  0  0  0  0  0
    1.3997    0.8741    0.0000 O   0  0  0  0  0  0  0  0  0  0  0  0
    4.5035   -1.7408    0.0000 C   0  0  0  0  0  0  0  0  0  0  0  0
    3.7213   -1.4786    0.0000 N   0  0  0  0  0  0  0  0  0  0  0  0
    3.1031   -2.0249    0.0000 C   0  0  0  0  0  0  0  0  0  0  0  0
    2.3209   -1.7628    0.0000 O   0  0  0  0  0  0  0  0  0  0  0  0
    3.2672   -2.8334    0.0000 C   0  0  0  0  0  0  0  0  0  0  0  0
    2.8047    0.8726    0.0000 O   0  0  0  0  0  0  0  0  0  0  0  0
    3.4197   -0.8665    0.0000 O   0  0  0  0  0  0  0  0  0  0  0  0
    5.2090   -0.2502    0.0000 C   0  0  0  0  0  0  0  0  0  0  0  0
    4.9132    1.5240    0.0000 C   0  0  0  0  0  0  0  0  0  0  0  0
    4.1467    1.3720    0.0000 C   0  0  0  0  0  0  0  0  0  0  0  0
    3.9506    0.5858    0.0000 N   0  0  0  0  0  0  0  0  0  0  0  0
    3.1252    0.5517    0.0000 O   0  0  0  0  0  0  0  0  0  0  0  0
    4.3835   -0.1075    0.0000 C   0  0  0  0  0  0  0  0  0  0  0  0
    3.7160   -0.5991    0.0000 O   0  0  0  0  0  0  0  0  0  0  0  0
  1 16  1  0  0  0  0
  1 46  1  0  0  0  0
  2  1  1  0  0  0  0
  3  2  1  0  0  0  0
  3 56  1  0  0  0  0
  5 53  1  0  0  0  0
  5 61  1  0  0  0  0
  6 51  1  0  0  0  0
  7  6  1  0  0  0  0
  8  7  1  0  0  0  0
  9  7  1  0  0  0  0
 10  9  2  0  0  0  0
 11  9  1  0  0  0  0
 12 11  1  0  0  0  0
 13 12  1  0  0  0  0
 13 64  1  0  0  0  0
 14 12  1  0  0  0  0
 15 14  2  0  0  0  0
 16 14  1  0  0  0  0
 17 18  1  0  0  0  0
 17 22  1  0  0  0  0
 17 23  2  0  0  0  0
 18 19  2  0  0  0  0
 19 20  1  0  0  0  0
 20 21  1  0  0  0  0
 20 29  1  0  0  0  0
 21 22  1  0  0  0  0
 21 28  2  0  0  0  0
 22 27  1  0  0  0  0
 23 24  1  0  0  0  0
 24 25  1  0  0  0  0
 24 26  2  0  0  0  0
 29 30  1  0  0  0  0
 29 33  1  0  0  0  0
 30 31  1  0  0  0  0
 31 32  1  0  0  0  0
 31 36  1  0  0  0  0
 32 33  1  0  0  0  0
 32 35  1  0  0  0  0
 33 34  1  0  0  0  0
 36 37  1  0  0  0  0
 36 38  1  0  0  0  0
 38 39  1  0  0  0  0
 38 40  1  0  0  0  0
 39 43  1  0  0  0  0
 40 41  1  0  0  0  0
 40 42  2  0  0  0  0
 43 44  1  0  0  0  0
 43 47  2  0  0  0  0
 44 45  1  0  0  0  0
 44 48  1  0  0  0  0
 45 46  1  0  0  0  0
 46 50  2  0  0  0  0
 48 49  1  0  0  0  0
 51 52  1  0  0  0  0
 52  5  1  0  0  0  0
 53 54  1  0  0  0  0
 53 55  2  0  0  0  0
 55  4  1  0  0  0  0
 56 57  1  0  0  0  0
 57 58  1  0  0  0  0
 57 62  1  0  0  0  0
 58 59  2  0  0  0  0
 58 60  1  0  0  0  0
 59  4  1  0  0  0  0
 61  4  1  0  0  0  0
 62  4  1  0  0  0  0
 64 65  1  0  0  0  0
 65 66  1  0  0  0  0
 66 67  1  0  0  0  0
 66 68  1  0  0  0  0
 67  4  1  0  0  0  0
 68 69  2  0  0  0  0
 68 63  1  0  0  0  0
 69  4  1  0  0  0  0
M  END
73
 

 49 54  0  0  0  0  0  0  0  0999 V2000
    3.9777    1.0018    0.0000 N   0  0  0  0  0  0  0  0  0  0  0  0
    3.2632    0.5893    0.0000 C   0  0  3  0  0  0  0  0  0  0  0  0
    3.2632   -0.2357    0.0000 C   0  0  0  0  0  0  0  0  0  0  0  0
    2.5487   -0.6482    0.0000 O   0  0  0  0  0  0  0  0  0  0  0  0
    2.5487    1.0018    0.0000 C   0  0  0  0  0  0  0  0  0  0  0  0
    1.8343    0.5893    0.0000 C   0  0  0  0  0  0  0  0  0  0  0  0
    1.1198    1.0018    0.0000 C   0  0  0  0  0  0  0  0  0  0  0  0
    0.4053    0.5893    0.0000 N   0  0  0  0  0  0  0  0  0  0  0  0
   -0.3091    1.0018    0.0000 C   0  0  0  0  0  0  0  0  0  0  0  0
    4.7746    0.7883    0.0000 C   0  0  0  0  0  0  0  0  0  0  0  0
    5.3579    1.3717    0.0000 O   0  0  0  0  0  0  0  0  0  0  0  0
    0.4053   -0.2357    0.0000 O   0  0  0  0  0  0  0  0  0  0  0  0
   -1.0236    0.5893    0.0000 O   0  0  0  0  0  0  0  0  0  0  0  0
   -0.3091    1.8268    0.0000 C   0  0  0  0  0  0  0  0  0  0  0  0
    3.6713   -0.9311    0.0000 N   0  0  0  0  0  0  0  0  0  0  0  0
    2.5443   -4.3120    0.0000 C   0  0  0  0  0  0  0  0  0  0  0  0
    3.2588   -3.8995    0.0000 C   0  0  3  0  0  0  0  0  0  0  0  0
    1.8298   -3.8995    0.0000 C   0  0  0  0  0  0  0  0  0  0  0  0
    1.1153   -4.3120    0.0000 C   0  0  0  0  0  0  0  0  0  0  0  0
    0.4009   -3.8995    0.0000 N   0  0  0  0  0  0  0  0  0  0  0  0
   -0.3136   -4.3120    0.0000 C   0  0  0  0  0  0  0  0  0  0  0  0
    0.4009   -3.0745    0.0000 O   0  0  0  0  0  0  0  0  0  0  0  0
   -1.0281   -3.8995    0.0000 O   0  0  0  0  0  0  0  0  0  0  0  0
   -0.3136   -5.1370    0.0000 C   0  0  0  0  0  0  0  0  0  0  0  0
    3.9732   -4.3120    0.0000 C   0  0  0  0  0  0  0  0  0  0  0  0
    3.9732   -5.1370    0.0000 O   0  0  0  0  0  0  0  0  0  0  0  0
    3.2588   -3.0745    0.0000 N   0  0  0  0  0  0  0  0  0  0  0  0
    3.6713   -2.3600    0.0000 C   0  0  0  0  0  0  0  0  0  0  0  0
    3.2588   -1.6456    0.0000 C   0  0  3  0  0  0  0  0  0  0  0  0
    4.4963   -2.3600    0.0000 O   0  0  0  0  0  0  0  0  0  0  0  0
   -1.0371   -1.6500    0.0000 Fe  0  0  0  0  0  0  0  0  0  0  0  0
    2.5280   -1.9048    0.0000 C   0  0  0  0  0  0  0  0  0  0  0  0
    2.3513   -1.1668    0.0000 C   0  0  0  0  0  0  0  0  0  0  0  0
    1.6913   -0.7661    0.0000 C   0  0  0  0  0  0  0  0  0  0  0  0
    0.9959   -1.1977    0.0000 N   0  0  0  0  0  0  0  0  0  0  0  0
    0.2814   -0.7852    0.0000 O   0  0  0  0  0  0  0  0  0  0  0  0
    0.9959   -2.0227    0.0000 C   0  0  0  0  0  0  0  0  0  0  0  0
    0.2814   -2.4352    0.0000 O   0  0  0  0  0  0  0  0  0  0  0  0
    1.7104   -2.4352    0.0000 C   0  0  0  0  0  0  0  0  0  0  0  0
    4.6877   -3.8995    0.0000 N   0  0  0  0  0  0  0  0  0  0  0  0
    4.9881   -0.0086    0.0000 C   0  0  0  0  0  0  0  0  0  0  0  0
    4.9012   -3.1026    0.0000 C   0  0  0  0  0  0  0  0  0  0  0  0
    5.6981   -2.8891    0.0000 C   0  0  0  0  0  0  0  0  0  0  0  0
    5.9116   -2.0922    0.0000 N   0  0  0  0  0  0  0  0  0  0  0  0
    6.2815   -3.4724    0.0000 O   0  0  0  0  0  0  0  0  0  0  0  0
    5.7850   -0.2221    0.0000 N   0  0  0  0  0  0  0  0  0  0  0  0
    6.4728   -1.4779    0.0000 C   0  0  0  0  0  0  0  0  0  0  0  0
    6.4728   -0.6529    0.0000 C   0  0  0  0  0  0  0  0  0  0  0  0
    7.1571   -0.1922    0.0000 O   0  0  0  0  0  0  0  0  0  0  0  0
  1  2  1  0  0  0  0
  1 10  1  0  0  0  0
  2  3  1  0  0  0  0
  2  5  1  0  0  0  0
  3  4  2  0  0  0  0
  3 15  1  0  0  0  0
  5  6  1  0  0  0  0
  6  7  1  0  0  0  0
  7  8  1  0  0  0  0
  8  9  1  0  0  0  0
  8 12  1  0  0  0  0
  9 13  2  0  0  0  0
  9 14  1  0  0  0  0
 10 11  2  0  0  0  0
 10 41  1  0  0  0  0
 16 17  1  0  0  0  0
 16 18  1  0  0  0  0
 17 25  1  0  0  0  0
 17 27  1  0  0  0  0
 18 19  1  0  0  0  0
 19 20  1  0  0  0  0
 20 21  1  0  0  0  0
 20 22  1  0  0  0  0
 21 23  2  0  0  0  0
 21 24  1  0  0  0  0
 25 26  2  0  0  0  0
 25 40  1  0  0  0  0
 27 28  1  0  0  0  0
 28 29  1  0  0  0  0
 28 30  2  0  0  0  0
 29 15  1  0  0  0  0
 29 32  1  0  0  0  0
 31 12  1  0  0  0  0
 31 13  1  0  0  0  0
 31 22  1  0  0  0  0
 31 23  1  0  0  0  0
 32 33  1  0  0  0  0
 33 34  1  0  0  0  0
 34 35  1  0  0  0  0
 35 36  1  0  0  0  0
 35 37  1  0  0  0  0
 36 31  1  0  0  0  0
 37 38  2  0  0  0  0
 37 39  1  0  0  0  0
 38 31  1  0  0  0  0
 40 42  1  0  0  0  0
 41 46  1  0  0  0  0
 42 43  1  0  0  0  0
 43 44  1  0  0  0  0
 43 45  2  0  0  0  0
 44 47  1  0  0  0  0
 47 48  1  0  0  0  0
 48 49  2  0  0  0  0
 48 46  1  0  0  0  0
M  END
74
 

 49 57  0  0  0  0  0  0  0  0999 V2000
   -0.2121   -2.1371    0.0000 O   0  0  0  0  0  0  0  0  0  0  0  0
   -0.8847   -2.5894    0.0000 C   0  0  0  0  0  0  0  0  0  0  0  0
   -1.0683   -3.3936    0.0000 C   0  0  3  0  0  0  0  0  0  0  0  0
   -0.5539   -4.0387    0.0000 C   0  0  0  0  0  0  0  0  0  0  0  0
    0.2711   -4.0387    0.0000 O   0  0  0  0  0  0  0  0  0  0  0  0
    0.7855   -3.3936    0.0000 C   0  0  0  0  0  0  0  0  0  0  0  0
    0.7669   -2.6130    0.0000 C   0  0  3  0  0  0  0  0  0  0  0  0
   -0.3250   -1.2858    0.0000 C   0  0  0  0  0  0  0  0  0  0  0  0
    0.1894   -0.7821    0.0000 C   0  0  3  0  0  0  0  0  0  0  0  0
    1.0144   -0.7821    0.0000 C   0  0  0  0  0  0  0  0  0  0  0  0
    1.5288   -1.4272    0.0000 O   0  0  0  0  0  0  0  0  0  0  0  0
    1.3923   -2.2079    0.0000 C   0  0  0  0  0  0  0  0  0  0  0  0
    1.3723   -0.0388    0.0000 O   0  0  0  0  0  0  0  0  0  0  0  0
    1.5898   -3.6950    0.0000 O   0  0  0  0  0  0  0  0  0  0  0  0
   -2.4428   -3.4997    0.0000 N   0  0  0  0  0  0  0  0  0  0  0  0
   -3.2678   -3.4997    0.0000 C   0  0  0  0  0  0  0  0  0  0  0  0
   -3.9823   -3.0872    0.0000 C   0  0  0  0  0  0  0  0  0  0  0  0
   -4.1958   -2.2903    0.0000 C   0  0  0  0  0  0  0  0  0  0  0  0
   -4.9927   -2.0768    0.0000 C   0  0  0  0  0  0  0  0  0  0  0  0
   -5.5761   -2.6601    0.0000 C   0  0  0  0  0  0  0  0  0  0  0  0
   -5.3625   -3.4570    0.0000 C   0  0  0  0  0  0  0  0  0  0  0  0
   -4.5656   -3.6706    0.0000 C   0  0  0  0  0  0  0  0  0  0  0  0
   -0.8831    0.2388    0.0000 N   0  0  0  0  0  0  0  0  0  0  0  0
   -1.7081    0.2388    0.0000 C   0  0  0  0  0  0  0  0  0  0  0  0
   -2.1206    0.9532    0.0000 C   0  0  0  0  0  0  0  0  0  0  0  0
   -2.1206   -0.4757    0.0000 O   0  0  0  0  0  0  0  0  0  0  0  0
   -1.7081    1.6677    0.0000 C   0  0  0  0  0  0  0  0  0  0  0  0
   -2.1206    2.3822    0.0000 C   0  0  0  0  0  0  0  0  0  0  0  0
   -2.9456    2.3822    0.0000 C   0  0  0  0  0  0  0  0  0  0  0  0
   -3.3581    1.6677    0.0000 C   0  0  0  0  0  0  0  0  0  0  0  0
   -2.9456    0.9533    0.0000 C   0  0  0  0  0  0  0  0  0  0  0  0
   -3.4813   -4.2966    0.0000 O   0  0  0  0  0  0  0  0  0  0  0  0
   -3.7362   -1.5523    0.0000 O   0  0  0  0  0  0  0  0  0  0  0  0
   -5.2062   -1.2799    0.0000 O   0  0  0  0  0  0  0  0  0  0  0  0
   -4.1831    1.6677    0.0000 O   0  0  0  0  0  0  0  0  0  0  0  0
   -3.3581    0.2388    0.0000 O   0  0  0  0  0  0  0  0  0  0  0  0
   -4.3024   -0.0720    0.0000 Fe  0  0  0  0  0  0  0  0  0  0  0  0
   -2.6400   -1.1786    0.0000 C   0  0  0  0  0  0  0  0  0  0  0  0
   -3.3545   -1.5911    0.0000 C   0  0  0  0  0  0  0  0  0  0  0  0
   -3.3545   -2.4161    0.0000 C   0  0  0  0  0  0  0  0  0  0  0  0
   -2.6400   -2.8286    0.0000 C   0  0  0  0  0  0  0  0  0  0  0  0
   -1.9255   -2.4161    0.0000 C   0  0  0  0  0  0  0  0  0  0  0  0
   -1.9255   -1.5911    0.0000 C   0  0  0  0  0  0  0  0  0  0  0  0
   -1.6345   -2.1665    0.0000 O   0  0  0  0  0  0  0  0  0  0  0  0
   -2.6400   -0.3536    0.0000 O   0  0  0  0  0  0  0  0  0  0  0  0
   -3.5504   -0.8486    0.0000 O   0  0  0  0  0  0  0  0  0  0  0  0
   -1.0932   -1.3436    0.0000 C   0  0  0  0  0  0  0  0  0  0  0  0
    0.3544   -1.8985    0.0000 N   0  0  0  0  0  0  0  0  0  0  0  0
   -1.1155   -0.5533    0.0000 O   0  0  0  0  0  0  0  0  0  0  0  0
  1  2  1  0  0  0  0
  1  8  1  0  0  0  0
  2  3  1  0  0  0  0
  2 44  2  0  0  0  0
  3  4  1  0  0  0  0
  3 15  1  0  0  0  0
  4  5  1  0  0  0  0
  5  6  1  0  0  0  0
  6  7  1  0  0  0  0
  6 14  2  0  0  0  0
  7 48  1  0  0  0  0
  8  9  1  0  0  0  0
  9 10  1  0  0  0  0
  9 23  1  0  0  0  0
 10 11  1  0  0  0  0
 10 13  2  0  0  0  0
 11 12  1  0  0  0  0
 12  7  1  0  0  0  0
 15 16  1  0  0  0  0
 16 17  1  0  0  0  0
 16 32  2  0  0  0  0
 17 18  2  0  0  0  0
 17 22  1  0  0  0  0
 18 19  1  0  0  0  0
 18 33  1  0  0  0  0
 19 20  2  0  0  0  0
 19 34  1  0  0  0  0
 20 21  1  0  0  0  0
 21 22  2  0  0  0  0
 23 24  1  0  0  0  0
 24 25  1  0  0  0  0
 24 26  2  0  0  0  0
 25 27  2  0  0  0  0
 25 31  1  0  0  0  0
 27 28  1  0  0  0  0
 28 29  2  0  0  0  0
 29 30  1  0  0  0  0
 30 31  2  0  0  0  0
 30 35  1  0  0  0  0
 31 36  1  0  0  0  0
 33 37  1  0  0  0  0
 34 37  1  0  0  0  0
 35 37  1  0  0  0  0
 36 37  1  0  0  0  0
 38 39  2  0  0  0  0
 38 43  1  0  0  0  0
 38 45  1  0  0  0  0
 39 40  1  0  0  0  0
 39 46  1  0  0  0  0
 40 41  2  0  0  0  0
 41 42  1  0  0  0  0
 42 43  2  0  0  0  0
 43 47  1  0  0  0  0
 45 37  1  0  0  0  0
 46 37  1  0  0  0  0
 47 49  2  0  0  0  0
 48 47  1  0  0  0  0
M  END
75
 

 95106  0  0  0  0  0  0  0  0999 V2000
   -6.7347    4.2676    0.0000 C   0  0  3  0  0  0  0  0  0  0  0  0
   -6.1736    3.7162    0.0000 C   0  0  3  0  0  0  0  0  0  0  0  0
   -5.4160    4.1327    0.0000 C   0  0  0  0  0  0  0  0  0  0  0  0
   -5.5397    4.8929    0.0000 N   0  0  0  0  0  0  0  0  0  0  0  0
   -6.3607    5.0321    0.0000 C   0  0  3  0  0  0  0  0  0  0  0  0
   -6.1505    7.4719    0.0000 C   0  0  3  0  0  0  0  0  0  0  0  0
   -6.7310    6.8812    0.0000 C   0  0  3  0  0  0  0  0  0  0  0  0
   -6.3735    6.1817    0.0000 C   0  0  3  0  0  0  0  0  0  0  0  0
   -5.5843    6.3349    0.0000 N   0  0  0  0  0  0  0  0  0  0  0  0
   -5.4156    7.1270    0.0000 C   0  0  0  0  0  0  0  0  0  0  0  0
   -3.9810    7.3163    0.0000 C   0  0  0  0  0  0  0  0  0  0  0  0
   -3.8274    6.4978    0.0000 N   0  0  0  0  0  0  0  0  0  0  0  0
   -3.0063    6.3480    0.0000 C   0  0  0  0  0  0  0  0  0  0  0  0
   -4.7852    7.6907    0.0000 C   0  0  0  0  0  0  0  0  0  0  0  0
   -3.1873    3.6047    0.0000 C   0  0  3  0  0  0  0  0  0  0  0  0
   -2.6359    4.1659    0.0000 C   0  0  0  0  0  0  0  0  0  0  0  0
   -3.0234    4.9530    0.0000 C   0  0  0  0  0  0  0  0  0  0  0  0
   -3.8416    4.7702    0.0000 N   0  0  0  0  0  0  0  0  0  0  0  0
   -3.9811    3.9784    0.0000 C   0  0  0  0  0  0  0  0  0  0  0  0
   -4.7198    3.6114    0.0000 C   0  0  0  0  0  0  0  0  0  0  0  0
   -2.6490    5.6590    0.0000 C   0  0  0  0  0  0  0  0  0  0  0  0
   -2.4244    6.7690    0.0000 C   0  0  3  0  0  0  0  0  0  0  0  0
   -2.5765    7.5799    0.0000 C   0  0  0  0  0  0  0  0  0  0  0  0
   -3.3548    7.8535    0.0000 C   0  0  3  0  0  0  0  0  0  0  0  0
   -7.1985    6.1817    0.0000 C   0  0  0  0  0  0  0  0  0  0  0  0
   -4.7881    8.4872    0.0000 C   0  0  0  0  0  0  0  0  0  0  0  0
   -3.9382    8.4369    0.0000 C   0  0  0  0  0  0  0  0  0  0  0  0
   -2.9423    8.5680    0.0000 C   0  0  0  0  0  0  0  0  0  0  0  0
   -3.3548    9.2825    0.0000 C   0  0  0  0  0  0  0  0  0  0  0  0
   -2.9423    9.9969    0.0000 N   0  0  0  0  0  0  0  0  0  0  0  0
   -4.1798    9.2825    0.0000 O   0  0  0  0  0  0  0  0  0  0  0  0
   -1.6581    6.4634    0.0000 C   0  0  0  0  0  0  0  0  0  0  0  0
   -1.0102    6.9742    0.0000 C   0  0  0  0  0  0  0  0  0  0  0  0
   -0.2439    6.6686    0.0000 C   0  0  0  0  0  0  0  0  0  0  0  0
    0.4039    7.1794    0.0000 N   0  0  0  0  0  0  0  0  0  0  0  0
   -0.1255    5.8521    0.0000 O   0  0  0  0  0  0  0  0  0  0  0  0
   -1.8390    4.3795    0.0000 C   0  0  0  0  0  0  0  0  0  0  0  0
   -2.0525    3.5826    0.0000 C   0  0  0  0  0  0  0  0  0  0  0  0
   -3.0419    2.7926    0.0000 C   0  0  0  0  0  0  0  0  0  0  0  0
   -2.2660    2.5125    0.0000 C   0  0  0  0  0  0  0  0  0  0  0  0
   -4.6554    5.6768    0.0000 Co  0  0  0  0  0  0  0  0  0  0  0  0
   -4.6554    6.3643    0.0000 C   0  0  0  0  0  0  0  0  0  0  0  0
   -4.6554    7.1304    0.0000 N   0  0  0  0  0  0  0  0  0  0  0  0
   -6.2963    8.2840    0.0000 C   0  0  0  0  0  0  0  0  0  0  0  0
   -5.6660    8.8162    0.0000 C   0  0  0  0  0  0  0  0  0  0  0  0
   -5.8118    9.6282    0.0000 C   0  0  0  0  0  0  0  0  0  0  0  0
   -5.1814   10.1605    0.0000 N   0  0  0  0  0  0  0  0  0  0  0  0
   -6.5879    9.9080    0.0000 O   0  0  0  0  0  0  0  0  0  0  0  0
   -7.5268    6.8295    0.0000 C   0  0  0  0  0  0  0  0  0  0  0  0
   -7.1435    7.5957    0.0000 C   0  0  0  0  0  0  0  0  0  0  0  0
   -7.9685    7.5957    0.0000 C   0  0  0  0  0  0  0  0  0  0  0  0
   -8.3810    8.3102    0.0000 N   0  0  0  0  0  0  0  0  0  0  0  0
   -8.3810    6.8812    0.0000 O   0  0  0  0  0  0  0  0  0  0  0  0
   -4.7160    2.8094    0.0000 C   0  0  0  0  0  0  0  0  0  0  0  0
   -7.5479    4.1284    0.0000 C   0  0  0  0  0  0  0  0  0  0  0  0
   -8.0750    4.7630    0.0000 C   0  0  0  0  0  0  0  0  0  0  0  0
   -8.8882    4.6238    0.0000 N   0  0  0  0  0  0  0  0  0  0  0  0
   -7.7890    5.5369    0.0000 O   0  0  0  0  0  0  0  0  0  0  0  0
   -6.9705    3.5027    0.0000 C   0  0  0  0  0  0  0  0  0  0  0  0
   -5.9379    2.9502    0.0000 C   0  0  0  0  0  0  0  0  0  0  0  0
   -3.5360    1.9456    0.0000 C   0  0  0  0  0  0  0  0  0  0  0  0
   -4.1193    2.5289    0.0000 N   0  0  0  0  0  0  0  0  0  0  0  0
   -4.9163    2.3154    0.0000 C   0  0  0  0  0  0  0  0  0  0  0  0
   -5.1298    1.5185    0.0000 C   0  0  0  0  0  0  0  0  0  0  0  0
   -4.5464    0.9352    0.0000 N   0  0  0  0  0  0  0  0  0  0  0  0
   -3.7495    1.1487    0.0000 C   0  0  0  0  0  0  0  0  0  0  0  0
   -3.1662    0.5653    0.0000 C   0  0  0  0  0  0  0  0  0  0  0  0
   -2.3692    0.7789    0.0000 C   0  0  0  0  0  0  0  0  0  0  0  0
   -2.1557    1.5757    0.0000 C   0  0  0  0  0  0  0  0  0  0  0  0
   -2.7391    2.1591    0.0000 C   0  0  0  0  0  0  0  0  0  0  0  0
   -1.7859    0.1955    0.0000 C   0  0  0  0  0  0  0  0  0  0  0  0
   -4.7599    0.1383    0.0000 C   0  0  3  0  0  0  0  0  0  0  0  0
   -5.5301   -0.1574    0.0000 C   0  0  3  0  0  0  0  0  0  0  0  0
   -5.4869   -0.9812    0.0000 C   0  0  3  0  0  0  0  0  0  0  0  0
   -4.6901   -1.1947    0.0000 C   0  0  3  0  0  0  0  0  0  0  0  0
   -4.2407   -0.5029    0.0000 O   0  0  0  0  0  0  0  0  0  0  0  0
   -4.3944   -1.9649    0.0000 C   0  0  0  0  0  0  0  0  0  0  0  0
   -3.5796   -2.0940    0.0000 O   0  0  0  0  0  0  0  0  0  0  0  0
   -6.2220    0.2919    0.0000 O   0  0  0  0  0  0  0  0  0  0  0  0
   -1.6354    3.0444    0.0000 C   0  0  0  0  0  0  0  0  0  0  0  0
   -0.8594    2.7642    0.0000 N   0  0  0  0  0  0  0  0  0  0  0  0
   -1.7807    3.8565    0.0000 O   0  0  0  0  0  0  0  0  0  0  0  0
   -6.1281   -1.5004    0.0000 O   0  0  0  0  0  0  0  0  0  0  0  0
   -7.1840    2.7058    0.0000 C   0  0  0  0  0  0  0  0  0  0  0  0
   -7.6111    1.1120    0.0000 C   0  0  0  0  0  0  0  0  0  0  0  0
   -7.8246    0.3152    0.0000 C   0  0  3  0  0  0  0  0  0  0  0  0
   -8.6215    0.1016    0.0000 C   0  0  0  0  0  0  0  0  0  0  0  0
   -7.1626   -0.1307    0.0000 O   0  0  0  0  0  0  0  0  0  0  0  0
   -6.5930   -0.7986    0.0000 P   0  0  3  0  0  0  0  0  0  0  0  0
   -7.4061   -1.2837    0.0000 O   0  0  0  0  0  0  0  0  0  0  0  0
   -5.8580   -0.3623    0.0000 O   0  0  0  0  0  0  0  0  0  0  0  0
   -7.9809    2.4923    0.0000 C   0  0  0  0  0  0  0  0  0  0  0  0
   -8.1944    1.6954    0.0000 N   0  0  0  0  0  0  0  0  0  0  0  0
   -8.5643    3.0757    0.0000 O   0  0  0  0  0  0  0  0  0  0  0  0
   -1.3588    1.7893    0.0000 C   0  0  0  0  0  0  0  0  0  0  0  0
  1  2  1  0  0  0  0
  1  5  1  0  0  0  0
  1 55  1  0  0  0  0
  2  3  1  0  0  0  0
  2 59  1  0  0  0  0
  2 60  1  0  0  0  0
  3  4  2  0  0  0  0
  3 20  1  0  0  0  0
  4  5  1  0  0  0  0
  6  7  1  0  0  0  0
  6 10  1  0  0  0  0
  6 44  1  0  0  0  0
  7  8  1  0  0  0  0
  7 49  1  0  0  0  0
  7 50  1  0  0  0  0
  8  9  1  0  0  0  0
  8  5  1  0  0  0  0
  8 25  1  0  0  0  0
  9 10  1  0  0  0  0
  9 41  1  0  0  0  0
 10 14  2  0  0  0  0
 11 12  2  0  0  0  0
 11 14  1  0  0  0  0
 11 24  1  0  0  0  0
 12 13  1  0  0  0  0
 13 21  2  0  0  0  0
 13 22  1  0  0  0  0
 14 26  1  0  0  0  0
 15 16  1  0  0  0  0
 15 19  1  0  0  0  0
 15 39  1  0  0  0  0
 16 17  1  0  0  0  0
 16 37  1  0  0  0  0
 16 38  1  0  0  0  0
 17 18  2  0  0  0  0
 17 21  1  0  0  0  0
 18 19  1  0  0  0  0
 19 20  2  0  0  0  0
 20 54  1  0  0  0  0
 22 23  1  0  0  0  0
 22 32  1  0  0  0  0
 23 24  1  0  0  0  0
 24 27  1  0  0  0  0
 24 28  1  0  0  0  0
 28 29  1  0  0  0  0
 29 30  1  0  0  0  0
 29 31  2  0  0  0  0
 32 33  1  0  0  0  0
 33 34  1  0  0  0  0
 34 35  1  0  0  0  0
 34 36  2  0  0  0  0
 39 40  1  0  0  0  0
 40 80  1  0  0  0  0
 41 18  1  0  0  0  0
 41 12  1  0  0  0  0
 41  4  1  0  0  0  0
 41 42  1  0  0  0  0
 41 62  1  0  0  0  0
 42 43  3  0  0  0  0
 44 45  1  0  0  0  0
 45 46  1  0  0  0  0
 46 47  1  0  0  0  0
 46 48  2  0  0  0  0
 50 51  1  0  0  0  0
 51 52  1  0  0  0  0
 51 53  2  0  0  0  0
 55 56  1  0  0  0  0
 56 57  1  0  0  0  0
 56 58  2  0  0  0  0
 59 84  1  0  0  0  0
 61 62  1  0  0  0  0
 61 66  2  0  0  0  0
 61 70  1  0  0  0  0
 62 63  1  0  0  0  0
 63 64  2  0  0  0  0
 64 65  1  0  0  0  0
 65 66  1  0  0  0  0
 65 72  1  0  0  0  0
 66 67  1  0  0  0  0
 67 68  2  0  0  0  0
 68 69  1  0  0  0  0
 68 71  1  0  0  0  0
 69 70  2  0  0  0  0
 69 95  1  0  0  0  0
 72 73  1  0  0  0  0
 72 76  1  0  0  0  0
 73 74  1  0  0  0  0
 73 79  1  0  0  0  0
 74 75  1  0  0  0  0
 74 83  1  0  0  0  0
 75 76  1  0  0  0  0
 75 77  1  0  0  0  0
 77 78  1  0  0  0  0
 80 81  1  0  0  0  0
 80 82  2  0  0  0  0
 84 92  1  0  0  0  0
 85 86  1  0  0  0  0
 86 87  1  0  0  0  0
 86 88  1  0  0  0  0
 88 89  1  0  0  0  0
 89 83  1  0  0  0  0
 89 90  1  0  0  0  0
 89 91  2  0  0  0  0
 92 93  1  0  0  0  0
 92 94  2  0  0  0  0
 93 85  1  0  0  0  0
M  END
76
 

129168  0  0  0  0  0  0  0  0999 V2000
    6.5457    4.9380    0.0125 C   0  0  0  0  0  0  0  0  0  0  0  0
    2.2538    5.1531    0.0164 Cu  0  0  0  0  0  0  0  0  0  0  0  0
   -3.2720    4.7968    0.0102 C   0  0  0  0  0  0  0  0  0  0  0  0
   -4.1451    6.4239    0.0148 P   0  0  0  0  0  0  0  0  0  0  0  0
   -5.4764    4.8982    0.0223 C   0  0  0  0  0  0  0  0  0  0  0  0
   -6.0462    6.9421   -0.0085 C   0  0  0  0  0  0  0  0  0  0  0  0
   -0.4111    8.3100    0.0156 Au  0  0  0  0  0  0  0  0  0  0  0  0
    1.8480    9.6521   -0.0018 C   0  0  0  0  0  0  0  0  0  0  0  0
    4.1290    8.2709    0.0125 Au  0  0  0  0  0  0  0  0  0  0  0  0
    6.9559    6.7261    0.0068 P   0  0  0  0  0  0  0  0  0  0  0  0
    8.6568    5.6233    0.0050 C   0  0  0  0  0  0  0  0  0  0  0  0
    8.5857    7.7036    0.0044 C   0  0  0  0  0  0  0  0  0  0  0  0
    1.8644    7.1338   -0.0241 Au  0  0  0  0  0  0  0  0  0  0  0  0
    1.2983    2.1247   -0.0107 P   0  0  0  0  0  0  0  0  0  0  0  0
    3.0490    1.5075   -0.0162 C   0  0  0  0  0  0  0  0  0  0  0  0
   -0.1053    0.3750   -0.0114 C   0  0  0  0  0  0  0  0  0  0  0  0
    1.8788    0.0772   -0.0150 C   0  0  0  0  0  0  0  0  0  0  0  0
    4.0420   10.9212   -0.0132 Au  0  0  0  0  0  0  0  0  0  0  0  0
    8.1579   12.8829   -0.0105 P   0  0  0  0  0  0  0  0  0  0  0  0
    7.2877   14.4873   -0.0071 C   0  0  0  0  0  0  0  0  0  0  0  0
    1.0536   14.5505   -0.0093 Cu  0  0  0  0  0  0  0  0  0  0  0  0
    0.9616   17.7201   -0.0004 C   0  0  0  0  0  0  0  0  0  0  0  0
    2.6939   17.1401    0.0043 P   0  0  0  0  0  0  0  0  0  0  0  0
    4.1131   18.8906    0.0001 C   0  0  0  0  0  0  0  0  0  0  0  0
    2.1215   19.1813    0.0082 C   0  0  0  0  0  0  0  0  0  0  0  0
    1.9080   12.3296    0.0111 Au  0  0  0  0  0  0  0  0  0  0  0  0
   -0.4731   10.9856   -0.0118 Au  0  0  0  0  0  0  0  0  0  0  0  0
   -3.3150   12.5833   -0.0100 P   0  0  0  0  0  0  0  0  0  0  0  0
   -2.8401   14.4163   -0.0096 C   0  0  0  0  0  0  0  0  0  0  0  0
   -4.9977   13.6850   -0.0124 C   0  0  0  0  0  0  0  0  0  0  0  0
   -4.9411   11.6090    0.0109 C   0  0  0  0  0  0  0  0  0  0  0  0
    9.4656   14.4072   -0.0065 C   0  0  0  0  0  0  0  0  0  0  0  0
   10.0225   12.3564   -0.0034 C   0  0  0  0  0  0  0  0  0  0  0  0
   -6.3313   15.9950   -0.0124 C   0  0  0  0  0  0  0  0  0  0  0  0
   -7.6650   15.2250   -0.0124 C   0  0  0  0  0  0  0  0  0  0  0  0
   -7.6650   13.6850   -0.0124 C   0  0  0  0  0  0  0  0  0  0  0  0
   -6.3313   12.9150   -0.0124 C   0  0  0  0  0  0  0  0  0  0  0  0
   -4.9977   15.2250   -0.0124 C   0  0  0  0  0  0  0  0  0  0  0  0
   -6.8101    5.6682    0.0223 C   0  0  0  0  0  0  0  0  0  0  0  0
   -8.1438    4.8982    0.0223 C   0  0  0  0  0  0  0  0  0  0  0  0
   -8.1438    3.3582    0.0223 C   0  0  0  0  0  0  0  0  0  0  0  0
   -6.8101    2.5881    0.0223 C   0  0  0  0  0  0  0  0  0  0  0  0
   -5.4764    3.3582    0.0223 C   0  0  0  0  0  0  0  0  0  0  0  0
   -7.3798    9.2522   -0.0085 C   0  0  0  0  0  0  0  0  0  0  0  0
   -8.7135    8.4822   -0.0085 C   0  0  0  0  0  0  0  0  0  0  0  0
   -8.7135    6.9421   -0.0085 C   0  0  0  0  0  0  0  0  0  0  0  0
   -7.3798    6.1721   -0.0085 C   0  0  0  0  0  0  0  0  0  0  0  0
   -6.0462    8.4822   -0.0085 C   0  0  0  0  0  0  0  0  0  0  0  0
   -6.2747   12.3790    0.0109 C   0  0  0  0  0  0  0  0  0  0  0  0
   -7.6084   11.6090    0.0109 C   0  0  0  0  0  0  0  0  0  0  0  0
   -7.6084   10.0690    0.0109 C   0  0  0  0  0  0  0  0  0  0  0  0
   -6.2747    9.2989    0.0109 C   0  0  0  0  0  0  0  0  0  0  0  0
   -4.9411   10.0690    0.0109 C   0  0  0  0  0  0  0  0  0  0  0  0
   11.3562   13.1264   -0.0034 C   0  0  0  0  0  0  0  0  0  0  0  0
   10.0225   10.8164   -0.0034 C   0  0  0  0  0  0  0  0  0  0  0  0
   11.3562   10.0463   -0.0034 C   0  0  0  0  0  0  0  0  0  0  0  0
   12.6898   10.8164   -0.0034 C   0  0  0  0  0  0  0  0  0  0  0  0
   12.6898   12.3564   -0.0034 C   0  0  0  0  0  0  0  0  0  0  0  0
   10.7992   16.7173   -0.0065 C   0  0  0  0  0  0  0  0  0  0  0  0
    9.4656   15.9472   -0.0065 C   0  0  0  0  0  0  0  0  0  0  0  0
   10.7992   13.6372   -0.0065 C   0  0  0  0  0  0  0  0  0  0  0  0
   12.1329   14.4072   -0.0065 C   0  0  0  0  0  0  0  0  0  0  0  0
   12.1329   15.9472   -0.0065 C   0  0  0  0  0  0  0  0  0  0  0  0
    9.9905    6.3933    0.0050 C   0  0  0  0  0  0  0  0  0  0  0  0
    8.6568    4.0832    0.0050 C   0  0  0  0  0  0  0  0  0  0  0  0
    9.9905    3.3132    0.0050 C   0  0  0  0  0  0  0  0  0  0  0  0
   11.3241    4.0832    0.0050 C   0  0  0  0  0  0  0  0  0  0  0  0
   11.3241    5.6233    0.0050 C   0  0  0  0  0  0  0  0  0  0  0  0
    9.9194   10.0137    0.0044 C   0  0  0  0  0  0  0  0  0  0  0  0
    8.5857    9.2436    0.0044 C   0  0  0  0  0  0  0  0  0  0  0  0
    9.9194    6.9336    0.0044 C   0  0  0  0  0  0  0  0  0  0  0  0
   11.2530    7.7036    0.0044 C   0  0  0  0  0  0  0  0  0  0  0  0
   11.2530    9.2436    0.0044 C   0  0  0  0  0  0  0  0  0  0  0  0
    5.2121    4.1680    0.0125 N   0  0  0  0  0  0  0  0  0  0  0  0
    5.2121    2.6279    0.0125 C   0  0  0  0  0  0  0  0  0  0  0  0
    6.5457    1.8579    0.0125 C   0  0  0  0  0  0  0  0  0  0  0  0
    7.8794    2.6279    0.0125 C   0  0  0  0  0  0  0  0  0  0  0  0
    7.8794    4.1680    0.0125 C   0  0  0  0  0  0  0  0  0  0  0  0
    6.5457    0.3179    0.0125 C   0  0  0  0  0  0  0  0  0  0  0  0
    5.4468   21.2007    0.0001 C   0  0  0  0  0  0  0  0  0  0  0  0
    4.1131   20.4306    0.0001 C   0  0  0  0  0  0  0  0  0  0  0  0
    5.4468   18.1206    0.0001 C   0  0  0  0  0  0  0  0  0  0  0  0
    6.7804   18.8906    0.0001 C   0  0  0  0  0  0  0  0  0  0  0  0
    6.7804   20.4306    0.0001 C   0  0  0  0  0  0  0  0  0  0  0  0
   -1.4389    1.1450   -0.0114 C   0  0  0  0  0  0  0  0  0  0  0  0
   -2.7726    0.3750   -0.0114 C   0  0  0  0  0  0  0  0  0  0  0  0
   -2.7726   -1.1651   -0.0114 C   0  0  0  0  0  0  0  0  0  0  0  0
   -1.4389   -1.9351   -0.0114 C   0  0  0  0  0  0  0  0  0  0  0  0
   -0.1053   -1.1651   -0.0114 C   0  0  0  0  0  0  0  0  0  0  0  0
    0.5452   -0.6928   -0.0150 C   0  0  0  0  0  0  0  0  0  0  0  0
    0.5452   -2.2329   -0.0150 C   0  0  0  0  0  0  0  0  0  0  0  0
    1.8788   -3.0029   -0.0150 C   0  0  0  0  0  0  0  0  0  0  0  0
    3.2125   -2.2329   -0.0150 C   0  0  0  0  0  0  0  0  0  0  0  0
    3.2125   -0.6928   -0.0150 C   0  0  0  0  0  0  0  0  0  0  0  0
    2.1215   22.2614    0.0082 C   0  0  0  0  0  0  0  0  0  0  0  0
    0.7878   21.4914    0.0082 C   0  0  0  0  0  0  0  0  0  0  0  0
    0.7878   19.9513    0.0082 C   0  0  0  0  0  0  0  0  0  0  0  0
    3.4551   19.9513    0.0082 C   0  0  0  0  0  0  0  0  0  0  0  0
    3.4551   21.4914    0.0082 C   0  0  0  0  0  0  0  0  0  0  0  0
    4.3826    2.2775   -0.0162 N   0  0  0  0  0  0  0  0  0  0  0  0
    3.0490   -0.0325   -0.0162 C   0  0  0  0  0  0  0  0  0  0  0  0
    4.3826   -0.8025   -0.0162 C   0  0  0  0  0  0  0  0  0  0  0  0
    5.7163   -0.0325   -0.0162 C   0  0  0  0  0  0  0  0  0  0  0  0
    5.7163    1.5075   -0.0162 C   0  0  0  0  0  0  0  0  0  0  0  0
    7.0500   -0.8025   -0.0162 C   0  0  0  0  0  0  0  0  0  0  0  0
   -4.6057    4.0268    0.0102 C   0  0  0  0  0  0  0  0  0  0  0  0
   -4.6057    2.4867    0.0102 C   0  0  0  0  0  0  0  0  0  0  0  0
   -3.2720    1.7167    0.0102 C   0  0  0  0  0  0  0  0  0  0  0  0
   -1.9384    2.4867    0.0102 C   0  0  0  0  0  0  0  0  0  0  0  0
   -1.9384    4.0268    0.0102 N   0  0  0  0  0  0  0  0  0  0  0  0
   -3.2720    0.1767    0.0102 C   0  0  0  0  0  0  0  0  0  0  0  0
   -2.8401   17.4964   -0.0096 C   0  0  0  0  0  0  0  0  0  0  0  0
   -4.1737   16.7263   -0.0096 C   0  0  0  0  0  0  0  0  0  0  0  0
   -4.1737   15.1863   -0.0096 C   0  0  0  0  0  0  0  0  0  0  0  0
   -1.5064   15.1863   -0.0096 N   0  0  0  0  0  0  0  0  0  0  0  0
   -1.5064   16.7263   -0.0096 C   0  0  0  0  0  0  0  0  0  0  0  0
   -2.8401   19.0364   -0.0096 C   0  0  0  0  0  0  0  0  0  0  0  0
    7.2877   17.5674   -0.0071 C   0  0  0  0  0  0  0  0  0  0  0  0
    5.9541   16.7974   -0.0071 C   0  0  0  0  0  0  0  0  0  0  0  0
    5.9541   15.2573   -0.0071 N   0  0  0  0  0  0  0  0  0  0  0  0
    8.6214   15.2573   -0.0071 C   0  0  0  0  0  0  0  0  0  0  0  0
    8.6214   16.7974   -0.0071 C   0  0  0  0  0  0  0  0  0  0  0  0
   -0.3721   20.0302   -0.0004 C   0  0  0  0  0  0  0  0  0  0  0  0
   -1.7057   19.2601   -0.0004 C   0  0  0  0  0  0  0  0  0  0  0  0
   -1.7057   17.7201   -0.0004 C   0  0  0  0  0  0  0  0  0  0  0  0
   -0.3721   16.9501   -0.0004 N   0  0  0  0  0  0  0  0  0  0  0  0
    0.9616   19.2601   -0.0004 C   0  0  0  0  0  0  0  0  0  0  0  0
   -3.0394   20.0302   -0.0004 C   0  0  0  0  0  0  0  0  0  0  0  0
    7.2877   19.1074   -0.0071 C   0  0  0  0  0  0  0  0  0  0  0  0
  1 10  1  0  0  0  0
  1 74  1  0  0  0  0
  1 78  2  0  0  0  0
  2  7  1  0  0  0  0
  2  9  1  0  0  0  0
  2 13  1  0  0  0  0
  3106  1  0  0  0  0
  3110  2  0  0  0  0
  4  3  1  0  0  0  0
  5  4  1  0  0  0  0
  6  4  1  0  0  0  0
  6 48  1  0  0  0  0
  7  4  1  0  0  0  0
  7  9  1  0  0  0  0
  7 13  1  0  0  0  0
  7 26  1  0  0  0  0
  7 27  1  0  0  0  0
  8  7  1  0  0  0  0
  8 13  1  0  0  0  0
  8 18  1  0  0  0  0
  8 26  1  0  0  0  0
  8 27  1  0  0  0  0
  9  8  1  0  0  0  0
  9 18  1  0  0  0  0
  9 26  1  0  0  0  0
 10  9  1  0  0  0  0
 11 10  1  0  0  0  0
 11 65  1  0  0  0  0
 12 10  1  0  0  0  0
 12 71  1  0  0  0  0
 13  9  1  0  0  0  0
 13 27  1  0  0  0  0
 14 13  1  0  0  0  0
 15 14  1  0  0  0  0
 15101  2  0  0  0  0
 16 14  1  0  0  0  0
 17 14  1  0  0  0  0
 17 90  2  0  0  0  0
 17 94  1  0  0  0  0
 18 13  1  0  0  0  0
 18 21  1  0  0  0  0
 18 26  1  0  0  0  0
 18 27  1  0  0  0  0
 19 18  1  0  0  0  0
 20 19  1  0  0  0  0
 20121  1  0  0  0  0
 21 26  1  0  0  0  0
 21 27  1  0  0  0  0
 22127  1  0  0  0  0
 23 22  1  0  0  0  0
 24 23  1  0  0  0  0
 24 82  1  0  0  0  0
 25 23  1  0  0  0  0
 25 98  1  0  0  0  0
 26 23  1  0  0  0  0
 27 26  1  0  0  0  0
 28 27  1  0  0  0  0
 29 28  1  0  0  0  0
 29115  2  0  0  0  0
 30 28  1  0  0  0  0
 30 38  1  0  0  0  0
 31 28  1  0  0  0  0
 32 19  1  0  0  0  0
 32 61  1  0  0  0  0
 33 19  1  0  0  0  0
 33 55  1  0  0  0  0
 34 35  1  0  0  0  0
 34 38  2  0  0  0  0
 35 36  2  0  0  0  0
 36 37  1  0  0  0  0
 37 30  2  0  0  0  0
 39 40  2  0  0  0  0
 39  5  1  0  0  0  0
 40 41  1  0  0  0  0
 41 42  2  0  0  0  0
 42 43  1  0  0  0  0
 43  5  2  0  0  0  0
 44 45  1  0  0  0  0
 44 48  2  0  0  0  0
 45 46  2  0  0  0  0
 46 47  1  0  0  0  0
 47  6  2  0  0  0  0
 49 50  2  0  0  0  0
 49 31  1  0  0  0  0
 50 51  1  0  0  0  0
 51 52  2  0  0  0  0
 52 53  1  0  0  0  0
 53 31  2  0  0  0  0
 54 58  1  0  0  0  0
 54 33  2  0  0  0  0
 55 56  2  0  0  0  0
 56 57  1  0  0  0  0
 57 58  2  0  0  0  0
 59 60  1  0  0  0  0
 59 63  2  0  0  0  0
 60 32  2  0  0  0  0
 61 62  2  0  0  0  0
 62 63  1  0  0  0  0
 64 68  1  0  0  0  0
 64 11  2  0  0  0  0
 65 66  2  0  0  0  0
 66 67  1  0  0  0  0
 67 68  2  0  0  0  0
 69 70  1  0  0  0  0
 69 73  2  0  0  0  0
 70 12  2  0  0  0  0
 71 72  2  0  0  0  0
 72 73  1  0  0  0  0
 74 75  2  0  0  0  0
 74  2  1  0  0  0  0
 75 76  1  0  0  0  0
 76 77  2  0  0  0  0
 76 79  1  0  0  0  0
 77 78  1  0  0  0  0
 80 81  1  0  0  0  0
 80 84  2  0  0  0  0
 81 24  2  0  0  0  0
 82 83  2  0  0  0  0
 83 84  1  0  0  0  0
 85 86  2  0  0  0  0
 85 16  1  0  0  0  0
 86 87  1  0  0  0  0
 87 88  2  0  0  0  0
 88 89  1  0  0  0  0
 89 16  2  0  0  0  0
 90 91  1  0  0  0  0
 91 92  2  0  0  0  0
 92 93  1  0  0  0  0
 93 94  2  0  0  0  0
 95 96  2  0  0  0  0
 95 99  1  0  0  0  0
 96 97  1  0  0  0  0
 97 25  2  0  0  0  0
 98 99  2  0  0  0  0
100104  2  0  0  0  0
100 15  1  0  0  0  0
100  2  1  0  0  0  0
101102  1  0  0  0  0
102103  2  0  0  0  0
103104  1  0  0  0  0
103105  1  0  0  0  0
106107  2  0  0  0  0
107108  1  0  0  0  0
108109  2  0  0  0  0
108111  1  0  0  0  0
109110  1  0  0  0  0
110  2  1  0  0  0  0
112113  1  0  0  0  0
112116  2  0  0  0  0
112117  1  0  0  0  0
113114  2  0  0  0  0
114 29  1  0  0  0  0
115116  1  0  0  0  0
115 21  1  0  0  0  0
118119  2  0  0  0  0
118122  1  0  0  0  0
118129  1  0  0  0  0
119120  1  0  0  0  0
120 20  2  0  0  0  0
120 21  1  0  0  0  0
121122  2  0  0  0  0
123124  1  0  0  0  0
123127  2  0  0  0  0
124125  2  0  0  0  0
124128  1  0  0  0  0
125126  1  0  0  0  0
126 22  2  0  0  0  0
126 21  1  0  0  0  0
M  END
77
 

205250  0  0  0  0  0  0  0  0999 V2000
    2.3194    4.8822    0.0000 C   0  0  0  0  0  0  0  0  0  0  0  0
    3.0846    5.1883    0.0000 C   0  0  0  0  0  0  0  0  0  0  0  0
    4.6597   -0.9192    0.0000 C   0  0  0  0  0  0  0  0  0  0  0  0
    5.1796   -1.6309    0.0000 C   0  0  0  0  0  0  0  0  0  0  0  0
   -0.2225   -4.8309    0.0000 C   0  0  0  0  0  0  0  0  0  0  0  0
   -0.7597   -5.5127    0.0000 C   0  0  0  0  0  0  0  0  0  0  0  0
   -5.3563   -1.2721    0.0000 C   0  0  0  0  0  0  0  0  0  0  0  0
   -6.1900   -0.8822    0.0000 C   0  0  0  0  0  0  0  0  0  0  0  0
   -3.7886    4.7026    0.0000 C   0  0  0  0  0  0  0  0  0  0  0  0
   -4.1894    4.0158    0.0000 C   0  0  0  0  0  0  0  0  0  0  0  0
   -4.9461    3.8280    0.0000 C   0  0  0  0  0  0  0  0  0  0  0  0
   -5.3465    3.0651    0.0000 N   0  0  0  0  0  0  0  0  0  0  0  0
   -4.7816    2.4511    0.0000 C   0  0  0  0  0  0  0  0  0  0  0  0
   -3.9720    2.6019    0.0000 C   0  0  0  0  0  0  0  0  0  0  0  0
   -3.6595    3.3185    0.0000 C   0  0  0  0  0  0  0  0  0  0  0  0
   -5.0440    1.6570    0.0000 C   0  0  0  0  0  0  0  0  0  0  0  0
   -5.8525    1.4740    0.0000 N   0  0  0  0  0  0  0  0  0  0  0  0
   -6.0016    0.6154    0.0000 C   0  0  0  0  0  0  0  0  0  0  0  0
   -5.4498    0.0228    0.0000 C   0  0  0  0  0  0  0  0  0  0  0  0
   -4.6043    0.2858    0.0000 C   0  0  0  0  0  0  0  0  0  0  0  0
   -4.4576    1.0792    0.0000 C   0  0  0  0  0  0  0  0  0  0  0  0
   -5.5053   -0.7723    0.0000 C   0  0  0  0  0  0  0  0  0  0  0  0
   -6.0375   -1.3910    0.0000 C   0  0  0  0  0  0  0  0  0  0  0  0
   -3.8121    5.5273    0.0000 C   0  0  0  0  0  0  0  0  0  0  0  0
   -3.3563    6.1940    0.0000 C   0  0  0  0  0  0  0  0  0  0  0  0
   -3.8404    6.9241    0.0000 C   0  0  0  0  0  0  0  0  0  0  0  0
   -3.4379    7.6220    0.0000 C   0  0  0  0  0  0  0  0  0  0  0  0
   -2.6247    7.6965    0.0000 C   0  0  0  0  0  0  0  0  0  0  0  0
   -2.1259    7.0316    0.0000 N   0  0  0  0  0  0  0  0  0  0  0  0
   -2.5598    6.2845    0.0000 C   0  0  0  0  0  0  0  0  0  0  0  0
   -6.0414   -2.1911    0.0000 C   0  0  0  0  0  0  0  0  0  0  0  0
   -5.4583   -2.7344    0.0000 C   0  0  0  0  0  0  0  0  0  0  0  0
   -5.5260   -3.5964    0.0000 N   0  0  0  0  0  0  0  0  0  0  0  0
   -6.3286   -3.8612    0.0000 C   0  0  0  0  0  0  0  0  0  0  0  0
   -6.9561   -3.3184    0.0000 C   0  0  0  0  0  0  0  0  0  0  0  0
   -6.8588   -2.5226    0.0000 C   0  0  0  0  0  0  0  0  0  0  0  0
   -2.2732    8.4466    0.0000 C   0  0  0  0  0  0  0  0  0  0  0  0
   -6.4930   -4.6690    0.0000 C   0  0  0  0  0  0  0  0  0  0  0  0
   -4.7724   -1.8622    0.0000 C   0  0  0  0  0  0  0  0  0  0  0  0
   -4.8559   -2.6529    0.0000 C   0  0  0  0  0  0  0  0  0  0  0  0
   -4.2361   -3.2397    0.0000 N   0  0  0  0  0  0  0  0  0  0  0  0
   -3.4640   -2.8934    0.0000 C   0  0  0  0  0  0  0  0  0  0  0  0
   -3.3498   -2.0772    0.0000 C   0  0  0  0  0  0  0  0  0  0  0  0
   -3.9642   -1.5468    0.0000 C   0  0  0  0  0  0  0  0  0  0  0  0
   -2.8052   -3.3997    0.0000 C   0  0  0  0  0  0  0  0  0  0  0  0
   -2.9494   -4.2353    0.0000 N   0  0  0  0  0  0  0  0  0  0  0  0
   -2.2022   -4.6820    0.0000 C   0  0  0  0  0  0  0  0  0  0  0  0
   -1.4771   -4.3861    0.0000 C   0  0  0  0  0  0  0  0  0  0  0  0
   -1.3725   -3.5443    0.0000 C   0  0  0  0  0  0  0  0  0  0  0  0
   -2.0427   -3.0729    0.0000 C   0  0  0  0  0  0  0  0  0  0  0  0
   -0.7441   -4.8177    0.0000 C   0  0  0  0  0  0  0  0  0  0  0  0
   -0.2433   -5.5231    0.0000 C   0  0  0  0  0  0  0  0  0  0  0  0
   -6.7374   -0.2540    0.0000 C   0  0  0  0  0  0  0  0  0  0  0  0
   -7.5621   -0.5016    0.0000 C   0  0  0  0  0  0  0  0  0  0  0  0
   -8.1298    0.0817    0.0000 C   0  0  0  0  0  0  0  0  0  0  0  0
   -7.9544    0.8829    0.0000 C   0  0  0  0  0  0  0  0  0  0  0  0
   -7.1527    1.1644    0.0000 N   0  0  0  0  0  0  0  0  0  0  0  0
   -6.5676    0.5291    0.0000 C   0  0  0  0  0  0  0  0  0  0  0  0
    0.5157   -5.7431    0.0000 C   0  0  0  0  0  0  0  0  0  0  0  0
    1.2112   -5.3467    0.0000 C   0  0  0  0  0  0  0  0  0  0  0  0
    2.0164   -5.6546    0.0000 N   0  0  0  0  0  0  0  0  0  0  0  0
    2.0373   -6.5032    0.0000 C   0  0  0  0  0  0  0  0  0  0  0  0
    1.3336   -6.9389    0.0000 C   0  0  0  0  0  0  0  0  0  0  0  0
    0.6007   -6.6221    0.0000 C   0  0  0  0  0  0  0  0  0  0  0  0
   -8.5570    1.4522    0.0000 C   0  0  0  0  0  0  0  0  0  0  0  0
    2.7593   -6.8894    0.0000 C   0  0  0  0  0  0  0  0  0  0  0  0
    0.5273   -4.4385    0.0000 C   0  0  0  0  0  0  0  0  0  0  0  0
    1.2519   -4.7520    0.0000 C   0  0  0  0  0  0  0  0  0  0  0  0
    2.0148   -4.3355    0.0000 N   0  0  0  0  0  0  0  0  0  0  0  0
    1.8974   -3.4928    0.0000 C   0  0  0  0  0  0  0  0  0  0  0  0
    1.1532   -3.1460    0.0000 C   0  0  0  0  0  0  0  0  0  0  0  0
    0.4569   -3.5874    0.0000 C   0  0  0  0  0  0  0  0  0  0  0  0
    2.5697   -2.9951    0.0000 C   0  0  0  0  0  0  0  0  0  0  0  0
    3.3328   -3.3660    0.0000 N   0  0  0  0  0  0  0  0  0  0  0  0
    3.9731   -2.7822    0.0000 C   0  0  0  0  0  0  0  0  0  0  0  0
    3.8989   -2.0100    0.0000 C   0  0  0  0  0  0  0  0  0  0  0  0
    3.1103   -1.6724    0.0000 C   0  0  0  0  0  0  0  0  0  0  0  0
    2.4840   -2.1828    0.0000 C   0  0  0  0  0  0  0  0  0  0  0  0
    4.5043   -1.4169    0.0000 C   0  0  0  0  0  0  0  0  0  0  0  0
    5.3328   -1.1223    0.0000 C   0  0  0  0  0  0  0  0  0  0  0  0
   -1.5188   -5.7074    0.0000 C   0  0  0  0  0  0  0  0  0  0  0  0
   -1.6402   -6.5790    0.0000 C   0  0  0  0  0  0  0  0  0  0  0  0
   -2.3782   -6.8742    0.0000 C   0  0  0  0  0  0  0  0  0  0  0  0
   -3.0639   -6.3994    0.0000 C   0  0  0  0  0  0  0  0  0  0  0  0
   -3.0067   -5.5526    0.0000 N   0  0  0  0  0  0  0  0  0  0  0  0
   -2.1956   -5.2790    0.0000 C   0  0  0  0  0  0  0  0  0  0  0  0
    5.7402   -0.4591    0.0000 C   0  0  0  0  0  0  0  0  0  0  0  0
    5.5540    0.3135    0.0000 C   0  0  0  0  0  0  0  0  0  0  0  0
    6.0773    1.0006    0.0000 N   0  0  0  0  0  0  0  0  0  0  0  0
    6.8907    0.7898    0.0000 C   0  0  0  0  0  0  0  0  0  0  0  0
    7.1192   -0.0043    0.0000 C   0  0  0  0  0  0  0  0  0  0  0  0
    6.6174   -0.6228    0.0000 C   0  0  0  0  0  0  0  0  0  0  0  0
   -3.8053   -6.7590    0.0000 C   0  0  0  0  0  0  0  0  0  0  0  0
    7.4645    1.3788    0.0000 C   0  0  0  0  0  0  0  0  0  0  0  0
    4.4930   -0.0880    0.0000 C   0  0  0  0  0  0  0  0  0  0  0  0
    5.0000    0.5170    0.0000 C   0  0  0  0  0  0  0  0  0  0  0  0
    4.8058    1.3559    0.0000 N   0  0  0  0  0  0  0  0  0  0  0  0
    3.9691    1.4855    0.0000 C   0  0  0  0  0  0  0  0  0  0  0  0
    3.4325    0.8677    0.0000 C   0  0  0  0  0  0  0  0  0  0  0  0
    3.6500    0.0835    0.0000 C   0  0  0  0  0  0  0  0  0  0  0  0
    3.6936    2.2731    0.0000 C   0  0  0  0  0  0  0  0  0  0  0  0
    4.2761    2.8934    0.0000 N   0  0  0  0  0  0  0  0  0  0  0  0
    3.9055    3.6709    0.0000 C   0  0  0  0  0  0  0  0  0  0  0  0
    3.1295    3.8290    0.0000 C   0  0  0  0  0  0  0  0  0  0  0  0
    2.5781    3.1781    0.0000 C   0  0  0  0  0  0  0  0  0  0  0  0
    2.8895    2.4259    0.0000 C   0  0  0  0  0  0  0  0  0  0  0  0
    2.7559    4.5803    0.0000 C   0  0  0  0  0  0  0  0  0  0  0  0
    2.6457    5.4941    0.0000 C   0  0  0  0  0  0  0  0  0  0  0  0
    5.1405   -2.4031    0.0000 C   0  0  0  0  0  0  0  0  0  0  0  0
    5.9493   -2.7616    0.0000 C   0  0  0  0  0  0  0  0  0  0  0  0
    6.0228   -3.5567    0.0000 C   0  0  0  0  0  0  0  0  0  0  0  0
    5.3882   -4.0766    0.0000 C   0  0  0  0  0  0  0  0  0  0  0  0
    4.5955   -3.7923    0.0000 N   0  0  0  0  0  0  0  0  0  0  0  0
    4.5550   -2.9264    0.0000 C   0  0  0  0  0  0  0  0  0  0  0  0
    2.2213    6.2128    0.0000 C   0  0  0  0  0  0  0  0  0  0  0  0
    1.4347    6.3111    0.0000 C   0  0  0  0  0  0  0  0  0  0  0  0
    1.0096    7.0527    0.0000 N   0  0  0  0  0  0  0  0  0  0  0  0
    1.5281    7.7242    0.0000 C   0  0  0  0  0  0  0  0  0  0  0  0
    2.3433    7.6394    0.0000 C   0  0  0  0  0  0  0  0  0  0  0  0
    2.7148    6.9141    0.0000 C   0  0  0  0  0  0  0  0  0  0  0  0
    5.5285   -4.8952    0.0000 C   0  0  0  0  0  0  0  0  0  0  0  0
    1.1779    8.4766    0.0000 C   0  0  0  0  0  0  0  0  0  0  0  0
    1.5485    5.0779    0.0000 C   0  0  0  0  0  0  0  0  0  0  0  0
    1.1610    5.7692    0.0000 C   0  0  0  0  0  0  0  0  0  0  0  0
    0.3081    5.9199    0.0000 N   0  0  0  0  0  0  0  0  0  0  0  0
   -0.1283    5.1960    0.0000 C   0  0  0  0  0  0  0  0  0  0  0  0
    0.2469    4.4598    0.0000 C   0  0  0  0  0  0  0  0  0  0  0  0
    1.0352    4.3623    0.0000 C   0  0  0  0  0  0  0  0  0  0  0  0
   -0.9606    5.2129    0.0000 C   0  0  0  0  0  0  0  0  0  0  0  0
   -1.3711    5.9351    0.0000 N   0  0  0  0  0  0  0  0  0  0  0  0
   -2.2207    5.8327    0.0000 C   0  0  0  0  0  0  0  0  0  0  0  0
   -2.6347    5.1380    0.0000 C   0  0  0  0  0  0  0  0  0  0  0  0
   -2.1556    4.3966    0.0000 C   0  0  0  0  0  0  0  0  0  0  0  0
   -1.3522    4.4900    0.0000 C   0  0  0  0  0  0  0  0  0  0  0  0
   -3.4180    4.9717    0.0000 C   0  0  0  0  0  0  0  0  0  0  0  0
   -4.1926    5.2521    0.0000 C   0  0  0  0  0  0  0  0  0  0  0  0
    3.8479    4.9412    0.0000 C   0  0  0  0  0  0  0  0  0  0  0  0
    4.4107    5.6087    0.0000 C   0  0  0  0  0  0  0  0  0  0  0  0
    5.1951    5.4485    0.0000 C   0  0  0  0  0  0  0  0  0  0  0  0
    5.5147    4.6875    0.0000 C   0  0  0  0  0  0  0  0  0  0  0  0
    5.0201    4.0007    0.0000 N   0  0  0  0  0  0  0  0  0  0  0  0
    4.1729    4.2144    0.0000 C   0  0  0  0  0  0  0  0  0  0  0  0
   -4.9564    5.0323    0.0000 C   0  0  0  0  0  0  0  0  0  0  0  0
   -5.3061    4.3419    0.0000 C   0  0  0  0  0  0  0  0  0  0  0  0
   -6.1432    4.1238    0.0000 N   0  0  0  0  0  0  0  0  0  0  0  0
   -6.6175    4.8162    0.0000 C   0  0  0  0  0  0  0  0  0  0  0  0
   -6.2841    5.5735    0.0000 C   0  0  0  0  0  0  0  0  0  0  0  0
   -5.5081    5.7077    0.0000 C   0  0  0  0  0  0  0  0  0  0  0  0
    6.3340    4.5844    0.0000 C   0  0  0  0  0  0  0  0  0  0  0  0
   -7.4493    4.7139    0.0000 C   0  0  0  0  0  0  0  0  0  0  0  0
   -7.7673    3.9349    0.0000 N   0  0  0  0  0  0  0  0  0  0  0  0
   -5.8584   -5.2296    0.0000 N   0  0  0  0  0  0  0  0  0  0  0  0
   -4.5019   -6.2770    0.0000 N   0  0  0  0  0  0  0  0  0  0  0  0
   -6.6296   -8.2800    0.0000 C   0  0  0  0  0  0  0  0  0  0  0  0
   -7.2704   -7.7802    0.0000 C   0  0  0  0  0  0  0  0  0  0  0  0
   -5.8445   -8.0631    0.0000 O   0  0  0  0  0  0  0  0  0  0  0  0
   -7.2542   -6.9658    0.0000 O   0  0  0  0  0  0  0  0  0  0  0  0
   -5.5786   -7.2772    0.0000 C   0  0  0  0  0  0  0  0  0  0  0  0
   -4.7791   -7.0968    0.0000 C   0  0  0  0  0  0  0  0  0  0  0  0
   -6.5604   -6.5154    0.0000 C   0  0  0  0  0  0  0  0  0  0  0  0
   -6.5815   -5.6935    0.0000 C   0  0  0  0  0  0  0  0  0  0  0  0
   -8.3389    2.2766    0.0000 N   0  0  0  0  0  0  0  0  0  0  0  0
  -10.9062    3.6635    0.0000 C   0  0  0  0  0  0  0  0  0  0  0  0
  -10.6386    4.4285    0.0000 C   0  0  0  0  0  0  0  0  0  0  0  0
  -10.4523    2.9878    0.0000 O   0  0  0  0  0  0  0  0  0  0  0  0
   -9.8640    4.6788    0.0000 O   0  0  0  0  0  0  0  0  0  0  0  0
   -9.6240    2.9818    0.0000 C   0  0  0  0  0  0  0  0  0  0  0  0
   -9.2006    2.2781    0.0000 C   0  0  0  0  0  0  0  0  0  0  0  0
   -9.2147    4.1738    0.0000 C   0  0  0  0  0  0  0  0  0  0  0  0
   -8.4422    4.4622    0.0000 C   0  0  0  0  0  0  0  0  0  0  0  0
    4.8764   -5.4366    0.0000 N   0  0  0  0  0  0  0  0  0  0  0  0
    3.4785   -6.4439    0.0000 N   0  0  0  0  0  0  0  0  0  0  0  0
    6.1921   -8.0375    0.0000 C   0  0  0  0  0  0  0  0  0  0  0  0
    5.5334   -8.5150    0.0000 C   0  0  0  0  0  0  0  0  0  0  0  0
    6.2065   -7.2241    0.0000 O   0  0  0  0  0  0  0  0  0  0  0  0
    4.7574   -8.2715    0.0000 O   0  0  0  0  0  0  0  0  0  0  0  0
    5.5286   -6.7474    0.0000 C   0  0  0  0  0  0  0  0  0  0  0  0
    5.5826   -5.9292    0.0000 C   0  0  0  0  0  0  0  0  0  0  0  0
    4.5186   -7.4768    0.0000 C   0  0  0  0  0  0  0  0  0  0  0  0
    3.7228   -7.2743    0.0000 C   0  0  0  0  0  0  0  0  0  0  0  0
    6.6648    3.8071    0.0000 N   0  0  0  0  0  0  0  0  0  0  0  0
    7.2358    2.1962    0.0000 N   0  0  0  0  0  0  0  0  0  0  0  0
    9.5336    4.3436    0.0000 C   0  0  0  0  0  0  0  0  0  0  0  0
    9.8034    3.5772    0.0000 C   0  0  0  0  0  0  0  0  0  0  0  0
    8.7559    4.5864    0.0000 O   0  0  0  0  0  0  0  0  0  0  0  0
    9.3505    2.9009    0.0000 O   0  0  0  0  0  0  0  0  0  0  0  0
    8.1092    4.0686    0.0000 C   0  0  0  0  0  0  0  0  0  0  0  0
    7.3376    4.3493    0.0000 C   0  0  0  0  0  0  0  0  0  0  0  0
    8.5217    2.8966    0.0000 C   0  0  0  0  0  0  0  0  0  0  0  0
    8.0965    2.1954    0.0000 C   0  0  0  0  0  0  0  0  0  0  0  0
   -1.4212    8.5081    0.0000 N   0  0  0  0  0  0  0  0  0  0  0  0
    0.3282    8.5303    0.0000 N   0  0  0  0  0  0  0  0  0  0  0  0
   -0.9942   11.3925    0.0000 C   0  0  0  0  0  0  0  0  0  0  0  0
   -0.1800   11.4020    0.0000 C   0  0  0  0  0  0  0  0  0  0  0  0
   -1.4752   10.7364    0.0000 O   0  0  0  0  0  0  0  0  0  0  0  0
    0.3182   10.7584    0.0000 O   0  0  0  0  0  0  0  0  0  0  0  0
   -1.1990    9.9530    0.0000 C   0  0  0  0  0  0  0  0  0  0  0  0
   -1.7157    9.3178    0.0000 C   0  0  0  0  0  0  0  0  0  0  0  0
    0.0633    9.9703    0.0000 C   0  0  0  0  0  0  0  0  0  0  0  0
    0.5969    9.3469    0.0000 C   0  0  0  0  0  0  0  0  0  0  0  0
   -0.5296    7.3248    0.0000 Fe  0  0  0  0  0  0  0  0  0  0  0  0
   -4.4525   -4.8076    0.0000 Fe  0  0  0  0  0  0  0  0  0  0  0  0
    5.8224    2.6038    0.0000 Fe  0  0  0  0  0  0  0  0  0  0  0  0
    3.4777   -4.9682    0.0000 Fe  0  0  0  0  0  0  0  0  0  0  0  0
   -6.9156    2.7150    0.0000 Fe  0  0  0  0  0  0  0  0  0  0  0  0
  1  2  1  0  0  0  0
  1123  1  0  0  0  0
  2137  1  0  0  0  0
  3  4  1  0  0  0  0
  3 95  1  0  0  0  0
  4109  1  0  0  0  0
  5  6  1  0  0  0  0
  5 67  1  0  0  0  0
  6 81  1  0  0  0  0
  7  8  1  0  0  0  0
  7 39  1  0  0  0  0
  8 53  1  0  0  0  0
  9 10  1  0  0  0  0
  9 24  1  0  0  0  0
 10 11  2  0  0  0  0
 10 15  1  0  0  0  0
 11 12  1  0  0  0  0
 12 13  2  0  0  0  0
 12205  1  0  0  0  0
 13 14  1  0  0  0  0
 13 16  1  0  0  0  0
 14 15  2  0  0  0  0
 16 17  2  0  0  0  0
 16 21  1  0  0  0  0
 17 18  1  0  0  0  0
 17205  1  0  0  0  0
 18 19  2  0  0  0  0
 19 20  1  0  0  0  0
 19 22  1  0  0  0  0
 20 21  2  0  0  0  0
 22 23  1  0  0  0  0
 23 31  1  0  0  0  0
 24 25  1  0  0  0  0
 25 30  1  0  0  0  0
 26 25  2  0  0  0  0
 26 27  1  0  0  0  0
 28 27  2  0  0  0  0
 28 29  1  0  0  0  0
 28 37  1  0  0  0  0
 29201  1  0  0  0  0
 30 29  2  0  0  0  0
 31 36  1  0  0  0  0
 32 31  2  0  0  0  0
 32 33  1  0  0  0  0
 33202  1  0  0  0  0
 34 33  2  0  0  0  0
 34 35  1  0  0  0  0
 34 38  1  0  0  0  0
 36 35  2  0  0  0  0
 38152  2  0  0  0  0
 39 40  2  0  0  0  0
 39 44  1  0  0  0  0
 40 41  1  0  0  0  0
 41 42  2  0  0  0  0
 41202  1  0  0  0  0
 42 43  1  0  0  0  0
 42 45  1  0  0  0  0
 43 44  2  0  0  0  0
 45 46  2  0  0  0  0
 45 50  1  0  0  0  0
 46 47  1  0  0  0  0
 46202  1  0  0  0  0
 47 48  2  0  0  0  0
 48 49  1  0  0  0  0
 48 51  1  0  0  0  0
 49 50  2  0  0  0  0
 51 52  1  0  0  0  0
 52 59  1  0  0  0  0
 53 58  1  0  0  0  0
 54 53  2  0  0  0  0
 54 55  1  0  0  0  0
 56 55  2  0  0  0  0
 56 57  1  0  0  0  0
 56 65  1  0  0  0  0
 57205  1  0  0  0  0
 58 57  2  0  0  0  0
 59 64  1  0  0  0  0
 60 59  2  0  0  0  0
 60 61  1  0  0  0  0
 61204  1  0  0  0  0
 62 61  2  0  0  0  0
 62 63  1  0  0  0  0
 62 66  1  0  0  0  0
 64 63  2  0  0  0  0
 66172  2  0  0  0  0
 67 68  2  0  0  0  0
 67 72  1  0  0  0  0
 68 69  1  0  0  0  0
 69 70  2  0  0  0  0
 69204  1  0  0  0  0
 70 71  1  0  0  0  0
 70 73  1  0  0  0  0
 71 72  2  0  0  0  0
 73 74  2  0  0  0  0
 73 78  1  0  0  0  0
 74 75  1  0  0  0  0
 74204  1  0  0  0  0
 75 76  2  0  0  0  0
 76 77  1  0  0  0  0
 76 79  1  0  0  0  0
 77 78  2  0  0  0  0
 79 80  1  0  0  0  0
 80 87  1  0  0  0  0
 81 86  1  0  0  0  0
 82 81  2  0  0  0  0
 82 83  1  0  0  0  0
 84 83  2  0  0  0  0
 84 85  1  0  0  0  0
 84 93  1  0  0  0  0
 85202  1  0  0  0  0
 86 85  2  0  0  0  0
 87 92  1  0  0  0  0
 88 87  2  0  0  0  0
 88 89  1  0  0  0  0
 89203  1  0  0  0  0
 90 89  2  0  0  0  0
 90 91  1  0  0  0  0
 90 94  1  0  0  0  0
 92 91  2  0  0  0  0
 94182  2  0  0  0  0
 95 96  2  0  0  0  0
 95100  1  0  0  0  0
 96 97  1  0  0  0  0
 97 98  2  0  0  0  0
 97203  1  0  0  0  0
 98 99  1  0  0  0  0
 98101  1  0  0  0  0
 99100  2  0  0  0  0
101102  2  0  0  0  0
101106  1  0  0  0  0
102103  1  0  0  0  0
102203  1  0  0  0  0
103104  2  0  0  0  0
104105  1  0  0  0  0
104107  1  0  0  0  0
105106  2  0  0  0  0
107108  1  0  0  0  0
108115  1  0  0  0  0
109114  1  0  0  0  0
110109  2  0  0  0  0
110111  1  0  0  0  0
112111  2  0  0  0  0
112113  1  0  0  0  0
112121  1  0  0  0  0
113204  1  0  0  0  0
114113  2  0  0  0  0
115120  1  0  0  0  0
116115  2  0  0  0  0
116117  1  0  0  0  0
117201  1  0  0  0  0
118117  2  0  0  0  0
118119  1  0  0  0  0
118122  1  0  0  0  0
120119  2  0  0  0  0
122192  2  0  0  0  0
123124  2  0  0  0  0
123128  1  0  0  0  0
124125  1  0  0  0  0
125126  2  0  0  0  0
125201  1  0  0  0  0
126127  1  0  0  0  0
126129  1  0  0  0  0
127128  2  0  0  0  0
129130  2  0  0  0  0
129134  1  0  0  0  0
130131  1  0  0  0  0
130201  1  0  0  0  0
131132  2  0  0  0  0
132133  1  0  0  0  0
132135  1  0  0  0  0
133134  2  0  0  0  0
135136  1  0  0  0  0
136143  1  0  0  0  0
137142  1  0  0  0  0
138137  2  0  0  0  0
138139  1  0  0  0  0
140139  2  0  0  0  0
140141  1  0  0  0  0
140149  1  0  0  0  0
141203  1  0  0  0  0
142141  2  0  0  0  0
143148  1  0  0  0  0
144143  2  0  0  0  0
144145  1  0  0  0  0
145205  1  0  0  0  0
146145  2  0  0  0  0
146147  1  0  0  0  0
146150  1  0  0  0  0
148147  2  0  0  0  0
150151  2  0  0  0  0
151170  1  0  0  0  0
151205  1  0  0  0  0
152161  1  0  0  0  0
152202  1  0  0  0  0
153 93  2  0  0  0  0
153159  1  0  0  0  0
153202  1  0  0  0  0
154155  1  0  0  0  0
154156  1  0  0  0  0
155157  1  0  0  0  0
156158  1  0  0  0  0
157160  1  0  0  0  0
158159  1  0  0  0  0
160161  1  0  0  0  0
162 65  2  0  0  0  0
162168  1  0  0  0  0
162205  1  0  0  0  0
163164  1  0  0  0  0
163165  1  0  0  0  0
164166  1  0  0  0  0
165167  1  0  0  0  0
166169  1  0  0  0  0
167168  1  0  0  0  0
169170  1  0  0  0  0
171121  2  0  0  0  0
171178  1  0  0  0  0
171204  1  0  0  0  0
172180  1  0  0  0  0
172204  1  0  0  0  0
173174  1  0  0  0  0
173175  1  0  0  0  0
174176  1  0  0  0  0
175177  1  0  0  0  0
176179  1  0  0  0  0
177178  1  0  0  0  0
179180  1  0  0  0  0
181149  2  0  0  0  0
181188  1  0  0  0  0
181203  1  0  0  0  0
182190  1  0  0  0  0
182203  1  0  0  0  0
183184  1  0  0  0  0
183185  1  0  0  0  0
184186  1  0  0  0  0
185187  1  0  0  0  0
186189  1  0  0  0  0
187188  1  0  0  0  0
189190  1  0  0  0  0
191 37  2  0  0  0  0
191198  1  0  0  0  0
191201  1  0  0  0  0
192200  1  0  0  0  0
192201  1  0  0  0  0
193194  1  0  0  0  0
193195  1  0  0  0  0
194196  1  0  0  0  0
195197  1  0  0  0  0
196199  1  0  0  0  0
197198  1  0  0  0  0
199200  1  0  0  0  0
M  END
78
 

 89 95  0  0  0  0  0  0  0  0999 V2000
    0.2117   -0.8558    0.0000 C   0  0  0  0  0  0  0  0  0  0  0  0
   -0.6133   -0.8558    0.0000 C   0  0  0  0  0  0  0  0  0  0  0  0
   -1.0258   -1.5703    0.0000 C   0  0  0  0  0  0  0  0  0  0  0  0
   -0.6133   -2.2848    0.0000 C   0  0  3  0  0  0  0  0  0  0  0  0
    0.2117   -2.2847    0.0000 C   0  0  3  0  0  0  0  0  0  0  0  0
    0.6242   -1.5703    0.0000 C   0  0  0  0  0  0  0  0  0  0  0  0
   -1.0258   -0.1413    0.0000 C   0  0  3  0  0  0  0  0  0  0  0  0
   -1.7049   -0.3313    0.0000 C   0  0  0  0  0  0  0  0  0  0  0  0
   -2.5017   -0.5448    0.0000 C   0  0  0  0  0  0  0  0  0  0  0  0
   -3.3458   -0.7819    0.0000 C   0  0  0  0  0  0  0  0  0  0  0  0
   -3.3458   -1.6069    0.0000 C   0  0  0  0  0  0  0  0  0  0  0  0
   -2.4546   -1.8440    0.0000 C   0  0  0  0  0  0  0  0  0  0  0  0
   -1.5870   -2.0575    0.0000 C   0  0  0  0  0  0  0  0  0  0  0  0
   -1.7565   -1.5703    0.0000 C   0  0  0  0  0  0  0  0  0  0  0  0
   -2.1690   -0.8558    0.0000 C   0  0  0  0  0  0  0  0  0  0  0  0
   -2.8290   -0.9501    0.0000 S   0  0  0  0  0  0  0  0  0  0  0  0
   -3.4065   -0.1413    0.0000 S   0  0  0  0  0  0  0  0  0  0  0  0
   -4.2270   -0.2280    0.0000 S   0  0  0  0  0  0  0  0  0  0  0  0
   -4.7122    0.4392    0.0000 C   0  0  0  0  0  0  0  0  0  0  0  0
   -0.5729    0.5755    0.0000 O   0  0  0  0  0  0  0  0  0  0  0  0
    0.6242   -0.1413    0.0000 N   0  0  0  0  0  0  0  0  0  0  0  0
    1.4492   -1.5703    0.0000 O   0  0  0  0  0  0  0  0  0  0  0  0
   -0.7077   -3.1043    0.0000 C   0  0  0  0  0  0  0  0  0  0  0  0
    0.6242   -2.9992    0.0000 O   0  0  0  0  0  0  0  0  0  0  0  0
    1.4492   -2.9992    0.0000 C   0  0  3  0  0  0  0  0  0  0  0  0
    1.8617   -3.7137    0.0000 C   0  0  0  0  0  0  0  0  0  0  0  0
    2.6867   -3.7137    0.0000 C   0  0  3  0  0  0  0  0  0  0  0  0
    3.0992   -2.9992    0.0000 C   0  0  3  0  0  0  0  0  0  0  0  0
    2.6867   -2.2847    0.0000 C   0  0  3  0  0  0  0  0  0  0  0  0
    1.8617   -2.2847    0.0000 O   0  0  0  0  0  0  0  0  0  0  0  0
    3.0992   -4.4281    0.0000 O   0  0  0  0  0  0  0  0  0  0  0  0
    2.6867   -5.1426    0.0000 C   0  0  0  0  0  0  0  0  0  0  0  0
    3.0992   -5.8571    0.0000 C   0  0  0  0  0  0  0  0  0  0  0  0
    1.8617   -5.1426    0.0000 O   0  0  0  0  0  0  0  0  0  0  0  0
    2.6867   -6.5716    0.0000 C   0  0  0  0  0  0  0  0  0  0  0  0
    3.0992   -7.2860    0.0000 C   0  0  0  0  0  0  0  0  0  0  0  0
    3.9242   -7.2861    0.0000 C   0  0  0  0  0  0  0  0  0  0  0  0
    4.3367   -6.5716    0.0000 C   0  0  0  0  0  0  0  0  0  0  0  0
    3.9242   -5.8571    0.0000 C   0  0  0  0  0  0  0  0  0  0  0  0
    1.8617   -6.5716    0.0000 N   0  0  0  0  0  0  0  0  0  0  0  0
    1.4492   -7.2860    0.0000 C   0  0  0  0  0  0  0  0  0  0  0  0
    0.6242   -7.2860    0.0000 C   0  0  0  0  0  0  0  0  0  0  0  0
    0.2117   -8.0005    0.0000 O   0  0  0  0  0  0  0  0  0  0  0  0
    0.2117   -6.5716    0.0000 C   0  0  0  0  0  0  0  0  0  0  0  0
    1.8617   -8.0005    0.0000 O   0  0  0  0  0  0  0  0  0  0  0  0
   -0.6133   -8.0005    0.0000 C   0  0  0  0  0  0  0  0  0  0  0  0
    5.1617   -6.5716    0.0000 O   0  0  0  0  0  0  0  0  0  0  0  0
    5.5742   -5.8571    0.0000 C   0  0  0  0  0  0  0  0  0  0  0  0
    4.3367   -8.0005    0.0000 O   0  0  0  0  0  0  0  0  0  0  0  0
    5.1617   -8.0005    0.0000 C   0  0  0  0  0  0  0  0  0  0  0  0
    3.9242   -2.9992    0.0000 O   0  0  0  0  0  0  0  0  0  0  0  0
    3.0992   -1.5703    0.0000 C   0  0  0  0  0  0  0  0  0  0  0  0
    1.4492   -0.1413    0.0000 C   0  0  0  0  0  0  0  0  0  0  0  0
    1.8617    0.5732    0.0000 O   0  0  0  0  0  0  0  0  0  0  0  0
    1.8617   -0.8558    0.0000 O   0  0  0  0  0  0  0  0  0  0  0  0
    2.6867   -0.8558    0.0000 C   0  0  0  0  0  0  0  0  0  0  0  0
   -0.5729    1.4005    0.0000 C   0  0  3  0  0  0  0  0  0  0  0  0
    0.1416    1.8130    0.0000 O   0  0  0  0  0  0  0  0  0  0  0  0
    0.1416    2.6380    0.0000 C   0  0  3  0  0  0  0  0  0  0  0  0
   -0.5729    3.0505    0.0000 C   0  0  3  0  0  0  0  0  0  0  0  0
   -1.2873    2.6380    0.0000 C   0  0  3  0  0  0  0  0  0  0  0  0
   -1.2873    1.8130    0.0000 C   0  0  3  0  0  0  0  0  0  0  0  0
   -0.5729    3.8755    0.0000 N   0  0  0  0  0  0  0  0  0  0  0  0
   -1.2873    4.2880    0.0000 O   0  0  0  0  0  0  0  0  0  0  0  0
   -1.2873    5.1130    0.0000 C   0  0  3  0  0  0  0  0  0  0  0  0
   -0.5729    5.5255    0.0000 O   0  0  0  0  0  0  0  0  0  0  0  0
   -0.5729    6.3505    0.0000 C   0  0  3  0  0  0  0  0  0  0  0  0
   -1.2873    6.7630    0.0000 C   0  0  3  0  0  0  0  0  0  0  0  0
   -2.0018    6.3505    0.0000 C   0  0  3  0  0  0  0  0  0  0  0  0
   -2.0018    5.5255    0.0000 C   0  0  0  0  0  0  0  0  0  0  0  0
   -2.7163    6.7630    0.0000 O   0  0  0  0  0  0  0  0  0  0  0  0
   -1.2873    7.5880    0.0000 S   0  0  0  0  0  0  0  0  0  0  0  0
[truncated: 74,361 more chars]
